# Supplementary material for: Selective catalytic synthesis of α-alkylated ketones and β-alkylated secondary alcohols via hydrogen-borrowing
Source: Royal Society of Chemistry journal article supplement (doi:10.1039/d3nj02295a), 2023-01-01
Supplement: d3nj02295a1.pdf [file d3nj02295a1.pdf]

## Supporting Information

# Selective Catalytic synthesis of $\alpha$ -Alkylated Ketones and $\beta$ -Alkylated Secondary Alcohols via Hydrogen-Borrowing Strategy

Md. Bakibillah, Sahin Reja, Kaushik Sarkar, Deboshmita Mukherjee, Rajesh Kumar Das\*

*Department of Chemistry, University of North Bengal, Darjeeling, West Bengal, India. Email. rajeshnbu@gmail.com*

**\* Corresponding author:** Rajesh Kumar Das, Assistant Professor, Department of Chemistry, University of North Bengal, Darjeeling, West Bengal, 734013, India, Mob: +919434459238

***E-mail address:*** [rajeshnbu@gmail.com](mailto:rajeshnbu@gmail.com)

|          |                                                               |
|----------|---------------------------------------------------------------|
| <b>1</b> | General Information                                           |
| <b>2</b> | General Procedure for synthesis of Ir-catalyzed compounds     |
| <b>3</b> | Characterization of ligands and Ir-complexes.                 |
| <b>4</b> | Characterization of Ir-catalyzed compounds.                   |
| <b>5</b> | Characterization of controlled experiment.                    |
| <b>6</b> | Crystal structure and relevant information of Ir-complex      |
| <b>7</b> | Copies of <sup>1</sup> H NMR, <sup>13</sup> C NMR, IR Spectra |

### 1. General Information:

All the reagents were purchased commercially and used without further purification. <sup>1</sup>H NMR and <sup>13</sup>C NMR were recorded with Bruker 400 MHz. <sup>1</sup>H NMR (400MHz) and <sup>13</sup>C NMR (100MHz) spectra were recorded in CDCl<sub>3</sub>, CD<sub>3</sub>OD or DMSO-d<sub>6</sub> with tetramethylsilane as the internal standard. Multiplicities are reported using the following abbreviations: s = singlet, d = doublet, t = triplet, q = quartet, m = multiplet, sep = septet, br = broad resonance. All the NMR spectra were acquired at ambient temperature. Analytical thin layer chromatography (TLC) was performed using Silica Gel 60 Å F254 pre-coated plates (0.25 mm thickness). Visualization of I<sub>2</sub> stained TLC plate was accomplished by a UV lamp and single-crystal data were collected from a Bruker-APEX-II CCD X-ray diffractometer.

### 2. General experimental procedure for preparation of catalyzed product [7a-7w, 8a-8r and 10aa-10fm] (C):

Ketone or secondary alcohol (1 mmol), alcohol (1.2 mmol), Ir(III) complex (0.005 mmol), <sup>t</sup>BuOK (0.2 mmol) and toluene (2 ml) were placed in a 5 ml screw-capped vial and allowed to react at 110°C for 2-10 h. The progress of the reaction was monitored by TLC. After completion of starting material, the reaction mass was evaporated and the residue was purified with column chromatography over silica gel where hexane/ethyl acetate mixture was used as eluent.

### 3. Characterization data of ligands (3a-3c):

All the reactions were carried out according to the general procedure A. (All reactions were carried out in 4 m.mol scale)

*N*-(naphthalen-1-yl) picolinamide(3a): Yield 860 mg, 85%

<sup>1</sup>H NMR (400 MHz, CDCl<sub>3</sub>): δ (ppm) = 10.75 (s, 1H), 8.71 (d, *J* = 4.6 Hz, 1H), 8.40-8.35 (m, 2H), 8.1 (d, *J* = 8.1 Hz, 1H), 7.95 (t, *J* = 6.2 Hz, 1H), 7.89 (d, *J* = 7.9 Hz, 1H), 7.70 (d, *J* = 8.2 Hz, 1H), 7.60-7.52 (m, 4H); <sup>13</sup>C {<sup>1</sup>H} NMR (100 MHz, CDCl<sub>3</sub>):δ (ppm) =162.1, 149.9, 148, 137.6, 134, 132.3, 128.7, 126.4, 126.2, 126.1, 125.9, 124.9, 122.3, 120.3, 118.4.

*N*-(naphthalen-2-yl) picolinamide (3b): Yield 840 mg, 84%

<sup>1</sup>H NMR (400 MHz, CDCl<sub>3</sub>): δ (ppm) = 10.2 (s, 1H), 8.64 (d, *J* = 7.5 Hz, 1H), 8.5 (s, 1H), 8.33 (d, *J* = 7.7 Hz, 1H), 7.94 (t, *J* = 6.4 Hz, 1H), 7.86 (d, *J* = 5.2 Hz, 2H), 7.80 (d, *J* = 7.7 Hz, 1H), 7.71 (d, *J* = 6.9 Hz, 1H), 7.51-7.45 (m, 2H), 7.43-7.39 (m, 1H); <sup>13</sup>C{<sup>1</sup>H} NMR (100 MHz, CDCl<sub>3</sub>): δ (ppm) = 162, 149.7, 147.9, 137.6, 135.1, 133.9, 130.6, 128.7, 127.6, 127.5, 126.44, 126.41, 124.9, 122.3, 119.7, 116.3.

*N*-(2,5-dimethylphenyl)picolinamide (3c): Yield 742 mg, 82%

<sup>1</sup>H NMR (400 MHz, CDCl<sub>3</sub>): δ (ppm) = 10.03 (s, 1H), 8.61 (d, *J* = 4.4 Hz, 1H), 8.29 (d, *J* = 7.7 Hz, 1H), 8.11 (s, 1H), 7.9 (t, *J* = 7.7 Hz, 1H), 7.48-7.45 (m, 1H), 7.09 (d, *J* = 7.6 Hz, 1H), 6.89 (d, *J* = 7.4 Hz, 1H), 2.36 (s, 6H); <sup>13</sup>C{<sup>1</sup>H} NMR (100 MHz, CDCl<sub>3</sub>): δ (ppm) = 161.6, 150, 147.9, 137.4, 136.4, 135.5, 130, 126.2, 125.1, 124.7, 122.1, 121.7, 21.1, 17.1.

***Characterization data of Ir(III) complexes (4a-Ir-4c-Ir):***

All the reaction was carried out according to the general procedure B. (All reactions were carried out in 4 m.mol scale)

**[*N*-(naphthalen-1-yl) picolinamide] Cp\*Ir(III) chloride (4a-Ir): Yield 2.22 g, 92%**

<sup>1</sup>H NMR (400 MHz, CDCl<sub>3</sub>): δ (ppm) = 8.61 (d, *J* = 5.2 Hz, 1H), 8.21 (d, *J* = 7.5 Hz, 1H), 7.96-7.92 (m, 2H), 7.85-7.84 (m, 2H), 7.65 (d, *J* = 7.8 Hz, 1H), 7.52-7.40 (m, 4H), 1.29 (s, 15H); <sup>13</sup>C{<sup>1</sup>H} NMR (100 MHz, CDCl<sub>3</sub>): δ (ppm) = 168.8, 155.1, 149.6, 146, 138.5, 133.6, 130.2, 128.2, 127.5, 127.4, 127.2, 126.6, 126.4, 126.1, 125.8, 125.2, 125.1, 125, 124.1, 122.4, 87.8, 86.7, 86.4, 84.6, 8.7, 8.6, 8.5, 8.

**[*N*-(naphthalen-2-yl) picolinamide] Cp\*Ir(III) chloride (4b-Ir): Yield 2.1 g, 86%**

<sup>1</sup>H NMR (400 MHz, CDCl<sub>3</sub>): δ (ppm) = 8.62 (d, *J* = 5.2 Hz, 1H), 8.21 (d, *J* = 7.8 Hz, 1H), 8.13 (s, 1H), 7.96 (t, *J* = 7.1 Hz, 1H), 7.90-7.87 (m, 1H), 7.84-7.78 (m, 3H), 7.52 (t, *J* = 6.9 Hz, 1H), 7.44-7.37 (m, 2H), 1.40 (s, 15H); <sup>13</sup>C{<sup>1</sup>H} NMR (100 MHz, CDCl<sub>3</sub>): δ (ppm) = 168.7, 155.7, 149.7, 145.9, 138.7, 133.8, 131.1, 127.7, 127.5, 127.1, 126.4, 125.6, 124.6, 123.9, 86.7, 8.5.

**[*N*-(2,5-dimethylphenyl)picolinamide] Cp\*Ir(III) chloride (4c-Ir): 1.98 g, 85%**

<sup>1</sup>H NMR (400 MHz, CDCl<sub>3</sub>): δ (ppm) = 8.57 (d, *J* = 5.2 Hz, 1H), 8.17 (d, *J* = 7.7 Hz, 1H), 8.90 (t, *J* = 6.9 Hz, 1H), 7.49 (s, 1H), 7.46 (t, *J* = 6.7 Hz, 1H), 7.05 (d, *J* = 7.5 Hz, 1H), 6.84 (d, *J* = 8.1 Hz, 1H), 2.25-2.21(m, 6H), 1.41 (s, 15H); <sup>13</sup>C{<sup>1</sup>H} NMR (100 MHz, CDCl<sub>3</sub>): δ (ppm) = 167.5, 155.4, 149.1, 146.6, 138.3, 135.3, 131.4, 129, 127, 126.6, 126.5, 125.5, 86.7, 29.5, 29.2, 20.8, 18.5, 8.45, 8.15.

#### **4. Characterization data of Ir catalysed compounds (7a-7w, 8a-8r, 10ab-10fm and 14).**

All the reactions were carried out in 1 mmol scale of ketone and according to the general procedure C.

**1,3-diphenylpropan-1-one (7a)**<sup>[1]</sup>: Yield 206 mg, 98%

<sup>1</sup>H NMR (400 MHz, CDCl<sub>3</sub>): δ (ppm) = 7.95 (d, *J* = 7.6 Hz, 2H), 7.54 (t, *J* = 7.4 Hz, 1H), 7.44 (t, *J* = 7.6 Hz, 2H), 7.31-7.21 (m, 4H), 7.19-7.13 (m, 1H), 3.30 (t, *J* = 7.6 Hz, 2H), 3.06 (t, *J* = 7.6 Hz, 2H).

**1-(2-fluorophenyl)-3-phenylpropan-1-one (7b)**<sup>[2]</sup>: Yield 187 mg, 82%

<sup>1</sup>H NMR (400 MHz, CD<sub>3</sub>OD): δ (ppm) = 7.82-7.77 (m, 1H), 7.60-7.55 (m, 1H), 7.31-7.18 (m, 6H), 7.17-7.13 (m, 1H), 3.27 (m, 2H), 2.99 (t, *J* = 7.5 Hz, 2H).

**1-(3-fluorophenyl)-3-phenylpropan-1-one (7c)**<sup>[3]</sup>: Yield 184 mg, 85%

<sup>1</sup>H NMR (400 MHz, CD<sub>3</sub>OD): δ (ppm) = 7.79 (d, *J* = 7.7 Hz, 1H), 7.64 (d, *J* = 9.6 Hz, 1H), 7.49 (q, *J*<sub>1</sub> = 8.04 Hz, *J*<sub>2</sub> = 13.8 Hz, 1H), 7.34-7.30 (m, 1H), 7.25-7.23(m, 4H), 7.16-7.12(m, 1H) 3.32 (t, *J* = 7.6 Hz, 2H), 3.00 (t, *J* = 7.2 Hz, 2H).

**1-(4-fluorophenyl)-3-phenylpropan-1-one (7d)**<sup>[1]</sup>: Yield 189 mg, 83%

<sup>1</sup>H NMR (400 MHz, CDCl<sub>3</sub>): δ (ppm) = 7.98-7.95(m, 2H), 7.31-7.20 (m, 4H), 7.10 (t, *J* = 8.4 Hz, 2H) 3.26 (t, *J* = 7.6 Hz, 2H), 3.05 (t, *J* = 8.4 Hz, 2H).

**3-phenyl-1-(o-tolyl)propan-1-one (7e)**<sup>[4]</sup>: Yield 188 mg, 84%

<sup>1</sup>H NMR (400 MHz, CD<sub>3</sub>OD): δ (ppm) = 7.64 (d, *J* = 6.8 Hz, 1H), 7.37-7.31 (m, 1H), 7.26-7.16 (m, 6H), 7.14-7.12 (m, 1H), 3.23 (t, *J* = 7.4 Hz, 2H), 2.97 (t, *J* = 7.4 Hz, 2H), 2.35 (s, 3H).

***3-phenyl-1-(m-tolyl) propan-1-one (7f)*<sup>[4]</sup>: yield 197 mg, 88%**

<sup>1</sup>H NMR (400 MHz, CDCl<sub>3</sub>): δ (ppm) = 7.75-7.73 (m, 2H), 7.43-7.13 (m, 7H), 3.28 (t, *J* = 7.6 Hz, 2H), 3.05 (t, *J* = 7.7 Hz, 2H), 2.39 (s, 3H).

<sup>1</sup>H NMR (400 MHz, DMSO-d<sub>6</sub>): δ (ppm) = 7.79-7.76 (m, 2H), 7.45-7.37 (m, 2H), 7.28-7.27 (m, 4H), 7.20-7.15 (m, 1H), 3.37-3.29 (m, 2H), 2.93 (t, *J* = 7.56 Hz, 2H), 2.36 (s, 3H).

***1-(2-methoxyphenyl)-3-phenylpropan-1-one (7g)*<sup>[4]</sup>: Yield 207 mg, 86%**

<sup>1</sup>H NMR (400 MHz, CD<sub>3</sub>OD): δ (ppm) = 7.55 (d, *J* = 7.4 Hz, 1H), 7.49 (t, *J* = 8.2 Hz, 1H), 7.23-7.09 (m, 6H), 6.98 (t, *J* = 7.4 Hz, 1H), 3.98 (s, 3H), 3.29-3.144 (m, 2H), 2.94 (t, *J* = 7.6 Hz, 2H).

***1-(3-methoxyphenyl)-3-phenylpropan-1-one (7h)*<sup>[1]</sup>: Yield 214 mg, 89%**

<sup>1</sup>H NMR (400 MHz, CDCl<sub>3</sub>): δ (ppm) = 7.52 (d, *J* = 7.2 Hz, 1H), 7.47 (s, 1H), 7.36-7.19 (m, 6H), 7.13-7.7.08 (m, 1H), 3.83 (s, 3H), 3.28 (t, *J* = 7.6 Hz, 2H), 3.05 (t, *J* = 7.6 Hz, 2H).

***1-(4-methoxyphenyl)-3-phenylpropan-1-one (7i)*<sup>[1]</sup>: Yield, 216 mg, 90%**

<sup>1</sup>H NMR (400 MHz, CDCl<sub>3</sub>): δ (ppm) = 7.93 (d, *J* = 8.7 Hz, 2H), 7.28-7.19 (m, 5H), 6.91 (d, *J* = 8.7 Hz, 2H), 3.85 (s, 3H), 3.24 (t, *J* = 7.2 Hz, 2H), 3.04 (t, *J* = 7.6 Hz, 2H).

***3-phenyl-1-(pyridin-3-yl) propan-1-one (7j)*<sup>[5]</sup>: Yield, 159 mg, 75%**

<sup>1</sup>H NMR (400 MHz, CD<sub>3</sub>OD): δ (ppm) = 9.07 (s, 1H), 8.69 (d, *J* = 4.8 Hz, 1H), 8.36-8.33 (m, 1H), 7.55-7.52 (m, 1H), 7.25-7.24 (m, 4H), 7.17-7.13 (m, 1H), 3.38 (t, *J* = 7.4 Hz, 2H), 3.01 (t, *J* = 7.6 Hz, 2H).

***3-phenyl-1-(pyridin-4-yl) propan-1-one (7k)*<sup>[5]</sup>: Yield, 163 mg, 77%**

<sup>1</sup>H NMR (400 MHz, CD<sub>3</sub>OD): δ (ppm) = 8.72-8.70 (m, 2H), 7.86-7.84 (m, 2H), 7.26-7.24 (m, 4H), 7.17-7.13 (m, 1H), 3.37 (t, *J* = 7.4 Hz, 2H), 3.02 (t, *J* = 7.4 Hz, 2H).

***1-(naphthalen-1-yl)-3-phenylpropan-1-one (7l)*<sup>[1]</sup>: Yield, 242 mg, 93%**

<sup>1</sup>H NMR (400 MHz, CDCl<sub>3</sub>): δ (ppm) = 7.53 (d, *J* = 8 Hz, 1H), 7.96 (d, *J* = 8.4 Hz, 1H), 7.88 (d, *J* = 6.8 Hz, 1H), 7.81 (d, *J* = 7.2 Hz, 1H), 7.58-7.44 (m, 3H), 7.29-7.13 (m, 6H), 3.44-3.36 (m, 2H), 3.13 (t, *J* = 7.6 Hz, 2H).

<sup>1</sup>H NMR (400 MHz, CD<sub>3</sub>OD): δ (ppm) = 8.38-8.36 (m, 1H), 8.02 (d, *J* = 8.2 Hz, 1H), 7.91-7.89 (m, 2H), 7.53-7.49 (m, 3H), 7.24-7.23 (m, 4H), 7.117-7.13 (q, *J*<sub>1</sub> = 4.5 Hz, *J*<sub>2</sub> = 8.6 Hz, 1H), 3.40 (t, *J* = 7.4 Hz, 2H), 3.07 (t, *J* = 7.4 Hz, 2H).

***1-(4-(1H-imidazol-1-yl) phenyl)-3-phenylpropan-1-one (7m)*: Yield 246 mg, 89%**

<sup>1</sup>H NMR (400 MHz, CDCl<sub>3</sub>): δ (ppm) = 8.07 (d, *J* = 8.5 Hz, 2H), 7.93 (s, 1H), 7.47 (d, *J* = 8.5 Hz, 2H), 7.33-7.28 (m, 4H), 7.24-7.19 (m, 3H), 3.31 (t, *J* = 7.6 Hz, 2H), 3.08 (t, *J* = 7.8 Hz, 2H); <sup>13</sup>C {<sup>1</sup>H} NMR (100 MHz, CDCl<sub>3</sub>): δ (ppm) = 197.6, 140.9, 140.5, 135.5, 130.8, 130.0, 128.5, 128.3, 126.2, 120.7, 40.4, 29.9.

***2-benzyl-2,3-dihydro-1H-inden-1-one (7n)*<sup>[6]</sup>: Yield 182 mg, 82%**

<sup>1</sup>H NMR (400 MHz, CDCl<sub>3</sub>): δ (ppm) = 7.77 (d, *J* = 7.6 Hz, 1H), 7.56 (t, *J* = 6.8 Hz, 1H), 7.40-7.34 (m, 2H), 7.31-7.27 (m, 2H), 7.24-7.20 (m, 3H), 3.41 (m, 1H), 3.19-3.13 (m, 1H), 3.02-2.97 (m, 1H), 2.87-2.82 (m, 1H), 2.65-2.63 (m, 1H).

***2-benzyl-3,4-dihydronaphthalen-1(2H)-one (7o)*<sup>[7]</sup>: Yield 201 mg, 85%**

<sup>1</sup>H NMR (400 MHz, CDCl<sub>3</sub>): δ (ppm) = 8.06 (d, *J* = 6.9 Hz, 1H), 7.45 (t, *J* = 6 Hz, 1H), 7.31-7.21 (m, 7H), 3.51-3.46 (dd, *J*<sub>1</sub> = 3.6 Hz, *J*<sub>2</sub> = 13.5 Hz, 1H), 2.93 (m, 2H), 2.76-2.71 (m, 1H), 2.66-2.60 (m, 1H), 2.13-2.08 (m, 1H), 1.88-1.74 (m, 1H).

***1-(3,5-difluorophenyl)-3-phenylpropan-1-one (7p)*<sup>[8]</sup>: Yield 224 mg, 91%**

<sup>1</sup>H NMR (400 MHz, CDCl<sub>3</sub>): δ (ppm) = 7.44-7.41 (m, 2H), 7.31-7.27 (m, 2H), 7.25-7.18 (m, 3H), 7.02-6.97 (m, 1H), 3.24 (t, *J* = 7.3 Hz, 2H), 3.05 (t, *J* = 7.7 Hz, 2H).

***1-(2-bromophenyl)-3-phenylpropan-1-one (7q)*<sup>[9]</sup>: Yield 243 mg, 84%**

<sup>1</sup>H NMR (400 MHz, CDCl<sub>3</sub>): δ (ppm) = 7.58 (d, *J* = 7.8 Hz, 1H), 7.35-7.19 (m, 8H), 3.30-3.22 (m, 2H), 3.05 (t, *J* = 7.7 Hz, 2H).

***1-(3-bromophenyl)-3-phenylpropan-1-one (7r)*** <sup>[4]</sup>: Yield 254 mg, 88%

<sup>1</sup>H NMR (400 MHz, CDCl<sub>3</sub>): δ (ppm) = 8.06-8.03 (br, 1H), 7.86 (d, *J* = 7.7 Hz, 1H), 7.67 (d, *J* = 8.1 Hz, 1H), 7.34-7.20 (m, 6H), 3.33-3.24 (m, 2H), 3.09-3.03 (m, 2H).

***1-(4-bromophenyl)-3-phenylpropan-1-one (7s)*** <sup>[7]</sup>: Yield 249 mg, 86%

<sup>1</sup>H NMR (400 MHz, CDCl<sub>3</sub>): δ (ppm) = 7.80 (d, *J* = 8.4 Hz, 2H), 7.58 (d, *J* = 8.5 Hz, 2H), 7.30-7.19 (m, 5H), 3.25 (t, *J* = 7.2 Hz, 2H), 3.05 (t, *J* = 7.8 Hz, 2H).

***3-phenyl-1-(4-(trifluoromethyl) phenyl) propan-1-one (7t)*** <sup>[5]</sup>: Yield 256 mg, 92%

<sup>1</sup>H NMR (400 MHz, CDCl<sub>3</sub>): δ (ppm) = 8.04 (d, *J* = 8.2 Hz, 2H), 7.7 (d, *J* = 8.4 Hz, 2H), 7.31-7.27 (m, 3H), 7.22-7.20 (m, 2H), 3.31 (t, *J* = 7.4 Hz, 2H), 3.07 (t, *J* = 7.5 Hz, 2H).

***1-(2-chlorophenyl)-3-phenylpropan-1-one (7u)*** <sup>[10]</sup>: Yield 222 mg, 91%

<sup>1</sup>H NMR (400 MHz, CDCl<sub>3</sub>): δ (ppm) = 7.40-7.34 (m, 3H), 7.27-7.24 (m, 2H), 7.22-7.18 (m, 4H), 3.26 (t, *J* = 7.4 Hz, 2H), 3.04 (t, *J* = 7.8 Hz, 2H).

***4-methyl-1-phenylpentan-3-one (7v)*** <sup>[6]</sup>: Yield 162 mg, 92%

<sup>1</sup>H NMR (400 MHz, CDCl<sub>3</sub>): δ (ppm) = 7.28-7.24 (m, 2H), 7.17 (d, *J* = 6.8 Hz, 3H), 2.88 (t, *J* = 7.4 Hz, 2H), 2.75 (t, *J* = 7.3 Hz, 2H), 2.59-2.52 (m, 1H), 1.06 (d, *J* = 6.7 Hz, 6H).

***4,4-dimethyl-1-phenylpentan-3-one (7w)*** <sup>[6]</sup>: Yield 165 mg, 87%

<sup>1</sup>H NMR (400 MHz, CDCl<sub>3</sub>): δ (ppm) = 7.28-7.24 (m, 2H), 7.18-7.16 (m, 3H), 2.84 (d, *J* = 7.1 Hz, 2H), 2.78 (d, *J* = 6.8 Hz, 2H), 1.09 (s, 9H).

***4-(3-phenylpropanoyl) benzonitrile (7x)*** <sup>[31]</sup>: Yield 167 mg, 71%

<sup>1</sup>H NMR (400 MHz, DMSO-d<sub>6</sub>): δ (ppm) = 8.12 (d, *J* = 8.24 Hz, 2H), 7.99 (d, *J* = 8.16 Hz, 2H), 7.31-7.25 (m, 4H), 7.19-7.16 (m, 1H), 3.43 (t, *J* = 7.4 Hz, 2H), 2.94 (t, *J* = 7.44 Hz, 2H), 1.06 (d, *J* = 6.7 Hz, 6H); IR(ATR): ( $\tilde{\nu}_{\text{max}}$ , cm<sup>-1</sup>) = 3062, 3027, 2925, 2854, **2230**, **1689**, 1605, 1452, 1403, 1290, 1205, 980.

**1-(3-nitrophenyl)-3-phenylpropan-1-one (7y)** <sup>[32]</sup>: Yield 107 mg, 42%

<sup>1</sup>H NMR (400 MHz, DMSO-d<sub>6</sub>): δ (ppm) = 8.65 (m, 1H), 8.47-8.45 (m, 1H), 8.42 (d, *J* = 7.72 Hz, 1H), 7.82 (t, *J* = 7.96 Hz, 1H), 7.31-7.26 (m, 4H), 7.26-7.16 (m, 1H), 3.50 (t, *J* = 7.4 Hz, 2H), 2.96 (t, *J* = 7.44 Hz, 2H).

<sup>1</sup>H NMR (400 MHz, CDCl<sub>3</sub>): δ (ppm) = 8.74 (s, 1H), 8.41-8.39 (m, 1H), 8.26 (d, *J* = 7.76 Hz, 1H), 7.65 (t, *J* = 8.04 Hz, 1H), 7.32-7.28 (m, 2H), 7.25-7.24 (m, 2H), 7.21-7.19 (m, 1H), 3.33 (t, *J* = 7.24 Hz, 2H), 3.09 (t, *J* = 7.6 Hz, 2H).

**2-methyl-1,3-diphenylpropan-1-one (7z)** <sup>[33]</sup>: Yield 171 mg, 76%

<sup>1</sup>H NMR (400 MHz, MeOD): δ (ppm) = 7.91 (d, *J* = 7.4 Hz, 2H), 7.56 (t, *J* = 7.48 Hz, 1H), 7.45 (t, *J* = 7.72 Hz, 1H), 7.28-7.16 (m, 4H), 7.13-7.10 (m, 1H), 3.90-3.85 (m, 1H), 3.10-3.04 (m, 1H), 2.71-2.66 (m, 1H), 1.19-1.14 (m, 3H).

<sup>1</sup>H NMR (400 MHz, DMSO-d<sub>6</sub>): δ (ppm) = 7.96 (d, *J* = 7.28 Hz, 2H), 7.62 (t, *J* = 7.44 Hz, 1H), 7.51 (t, *J* = 7.36 Hz, 2H), 7.26-7.20 (m, 4H), 7.18-7.13 (m, 1H), 3.94-3.88 (m, 1H), 3.07-2.99 (m, 1H), 2.66-2.63 (m, 1H), 1.10-1.06 (m, 3H).

**1-(4-chlorophenyl)-2-methyl-3-phenylpropan-1-one (7za)** <sup>[34]</sup>: Yield 209 mg, 81%

<sup>1</sup>H NMR (400 MHz, DMSO-d<sub>6</sub>): δ (ppm) = 7.97 (d, *J* = 8.56 Hz, 2H), 7.57 (d, *J* = 8.56 Hz, 2H), 7.26-7.20 (m, 4H), 7.17-7.13 (m, 1H), 3.92-3.88 (m, 1H), 3.02-2.97 (m, 1H), 2.66-2.61 (m, 1H), 1.06 (d, *J* = 6.84 Hz, 3H).

**3-(3-chloro-4-methylphenyl)-1-phenylpropan-1-one (8a)**: Yield 235 mg, 91%

<sup>1</sup>H NMR (400 MHz, CDCl<sub>3</sub>): δ (ppm) = 7.94 (d, *J* = 7.4 Hz, 2H), 7.55 (t, *J* = 7.4 Hz, 1H), 7.46-7.42 (m, 2H), 7.23 (d, *J* = 7.6 Hz, 1H), 7.13 (d, *J* = 7.6 Hz, 1H), 7.03 (d, *J* = 7.5 Hz, 1H), 3.27 (t, *J* = 7.3 Hz, 2H), 3.00 (t, *J* = 7.5 Hz, 2H), 2.32 (s, 3H). <sup>13</sup>C {<sup>1</sup>H} NMR (100 MHz, CDCl<sub>3</sub>): δ (ppm) = 198.7, 140.4, 136.6, 134.1, 133.5, 133, 130, 128.8, 128.5, 128.1, 127.9, 40, 29.2, 19.5;



***3-(3,4-dimethoxyphenyl)-1-phenylpropan-1-one (8b)***<sup>[1]</sup>: Yield 246 mg, 91%

<sup>1</sup>H NMR (400 MHz, CDCl<sub>3</sub>): δ (ppm) = 7.95 (d, *J* = 7.7 Hz, 2H), 7.54 (t, *J* = 7.2 Hz, 1H), 7.44 (t, *J* = 7.6 Hz, 2H), 6.78- 6.76 (m, 3H), 3.84 (s, 6H), 3.27 (t, *J* = 7.6 Hz, 2H), 3.01 (t, *J* = 7.6 Hz, 2H).

***3-(4-methoxyphenyl)-1-phenylpropan-1-one (8c)***<sup>[1]</sup>: Yield 216 mg, 90%

<sup>1</sup>H NMR (400 MHz, CDCl<sub>3</sub>): δ (ppm) = 7.94 (d, *J* = 7.8 Hz, 2H), 7.54 (t, *J* = 7.4 Hz, 1H), 7.44 (t, *J* = 7.6 Hz, 2H), 7.16 (t, *J* = 8.4 Hz, 2H), 6.83 (d, *J* = 8.4 Hz, 2H), 3.78 (s, 3H), 3.26 (t, *J* = 7.6 Hz, 2H), 3.01 (t, *J* = 7.6 Hz, 2H).

***3-(3,4-dimethoxyphenyl)-1-(p-tolyl) propan-1-one (8d)***<sup>[11]</sup>: Yield 234 mg, 82% to be replaced

<sup>1</sup>H NMR (400 MHz, CDCl<sub>3</sub>): δ (ppm) = 7.84 (d, *J* = 8.04 Hz, 1H), 7.24-7.22 (m, 2H), 6.80-6.76 (m, 3H), 3.85-3.84 (m, 6H), 3.24 (t, *J* = 7.32 Hz, 2H), 2.99 (t, *J* = 7.84 Hz, 2H), 2.39 (s, 3H).

***1,6-diphenylhexan-1-one (8e)***<sup>[1]</sup>: Yield 229 mg, 91%

<sup>1</sup>H NMR (400 MHz, CDCl<sub>3</sub>): δ (ppm) = 7.94 (d, *J* = 7.4 Hz, 2H), 7.54 (d, *J* = 7.3 Hz, 1H), 7.44 (t, *J* = 7.6 Hz, 2H), 7.28-7.25 (m, 2H), 7.17-7.15 (m, 3H), 2.95 (t, *J* = 7.4 Hz, 2H), 2.62 (t, *J* = 7.6 Hz, 2H), 1.80-1.71 (m, 2H), 1.69-1.59 (m, 2H), 1.46-1.42 (m, 2H).

***3-(4-bromophenyl)-1-phenylpropan-1-one (8f)***<sup>[1]</sup>: Yield 260 mg, 90%

<sup>1</sup>H NMR (400 MHz, CDCl<sub>3</sub>): δ (ppm) = 7.93 (d, *J* = 7.2 Hz, 2H), 7.55-7.5 (m, 1H), 7.46-7.38 (m, 4H), 7.12 (d, *J* = 7.0 Hz, 2H), 3.27 (t, *J* = 7.4 Hz, 2H), 3.03-3.02 (m, 2H).

***1-phenyl-3-(pyridin-2-yl) propan-1-one (8g)***<sup>[12]</sup>: Yield 175 mg, 83%

<sup>1</sup>H NMR (400 MHz, CDCl<sub>3</sub>): δ (ppm) = 8.51-8.50 (m, 1H), 7.98 (d, *J* = 7.2 Hz, 2H), 7.61-7.52 (m, 2H), 7.44 (t, *J* = 7.6 Hz, 2H), 7.21-7.20 (m, 1H), 7.12-7.09 (m, 1H), 3.51 (t, *J* = 7.2 Hz, 2H), 3.23 (t, *J* = 7.2 Hz, 2H).

***3-(6-(dimethylamino) pyridin-3-yl)-1-phenylpropan-1-one (8h)***: Yield 206 mg, 81%

<sup>1</sup>H NMR (400 MHz, CDCl<sub>3</sub>): δ (ppm) = 8.05 (s, 1H), 7.93 (d, *J* = 7.2 Hz, 2H), 7.54 (t, *J* = 7.2 Hz, 1H), 7.43 (t, *J* = 7.6 Hz, 2H), 7.37-7.35 (m, 1H), 6.46 (d, *J* = 8.4 Hz, 1H), 3.22 (t, *J* = 7.4 Hz, 2H), 3.04 (s, 6H), 2.92 (t, *J* = 7.6 Hz, 2H). <sup>13</sup>C{<sup>1</sup>H} NMR (100 MHz, CDCl<sub>3</sub>): δ (ppm) = 198.6, 158.1, 147, 137.6, 136.7, 133.1, 128.6, 128.5, 127.4, 123.6, 105.7, 40.4, 38.2, 26.7;

**3-(3-bromophenyl)-1-phenylpropan-1-one (8i)** <sup>[13]</sup>: Yield 263 mg 91%

<sup>1</sup>H NMR (400 MHz, CDCl<sub>3</sub>): δ (ppm) 7.95-7.93 (m, 2H), 7.55 (t, *J* = 6.8 Hz, 1H), 7.47-7.40 (m, 3H), 7.33-7.31 (m, 1H), 7.18-7.12 (m, 2H), 3.28 (t, *J* = 7.4 Hz, 2H), 3.03 (t, *J* = 7.4 Hz, 2H).

**3-(4-methoxy-3-(trifluoromethyl) phenyl)-1-phenylpropan-1-one (8j)**: Yield 290 mg, 94%

<sup>1</sup>H NMR (400 MHz, CDCl<sub>3</sub>): δ (ppm) = 7.94 (d, *J* = 7.4 Hz, 2H), 7.55 (t, *J* = 7.2 Hz, 1H), 7.46-7.42 (m, 3H), 7.38-7.36 (m, 1H), 6.91 (d, *J* = 8.4 Hz, 1H), 3.86 (s, 3H), 3.32 (t, *J* = 4.5 Hz, 2H), 3.03 (t, *J* = 7.2 Hz, 2H); <sup>13</sup>C{<sup>1</sup>H} NMR (100 MHz, CDCl<sub>3</sub>): δ (ppm) = 198.8, 155.8, 136.7, 133.18, 133.13, 132.9, 128.6, 127.9, 126.9, 126.8, 125, 122.3, 118.7, 118.4, 112.1, 55.9, 40.2, 29.6, 28.9.

**1-phenyl-3-(5-phenylthiophen-2-yl) propan-1-one (8k)**: Yield 269 mg, 92%

<sup>1</sup>H NMR (400 MHz, CDCl<sub>3</sub>): δ (ppm) = 7.97 (d, *J* = 7.3 Hz, 2H), 7.59-7.53 (m, 4H), 7.46 (t, *J* = 7.4 Hz, 2H), 7.33 (t, *J* = 7.4 Hz, 2H), 7.11 (d, *J* = 3.5 Hz, 1H), 6.82 (d, *J* = 3.5 Hz, 1H), 3.39 (t, *J* = 6.5 Hz, 2H), 3.28 (t, *J* = 6.8 Hz, 2H); <sup>13</sup>C{<sup>1</sup>H} NMR (100 MHz, CDCl<sub>3</sub>): δ (ppm) = 198.4, 145, 143.6, 142.7, 139.9, 136.6, 134.6, 134.3, 133.1, 129.1, 128.8, 128.7, 128.5, 127.9, 127.7, 127, 125.7, 125.5, 122.7, 122.5, 40.31, 24.4

**3-(2-chlorophenyl)-1-phenylpropan-1-one (8l)** <sup>[14]</sup>: Yield 201 mg, 82%

<sup>1</sup>H NMR (400 MHz, CD<sub>3</sub>OD): δ (ppm) = 7.98-7.96 (m, 2H), 7.58 (t, *J* = 7.4 Hz, 1H), 7.47 (t, *J* = 7.6 Hz, 2H), 7.36-7.32 (m, 2H), 7.22-7.15 (m, 2H), 3.35-3.29 (m, 2H), 3.13 (t, *J* = 7.4 Hz, 2H).

**3-(2-(3-chlorophenyl) thiazol-4-yl)-1-phenylpropan-1-one (8m)**: yield 258 mg, 79%

<sup>1</sup>H NMR (400 MHz, CDCl<sub>3</sub>): δ (ppm) = 7.99 (d, *J* = 7.3 Hz, 2H), 7.92 (s, 1H), 7.76-7.74 (m, 1H), 7.55-7.53 (m, 1H), 7.45 (t, *J* = 7.8 Hz, 1H), 7.35-7.31 (m, 2H), 7.01 (s, 1H), 3.48 (t, *J* = 7.2 Hz, 2H), 3.26 (t, *J* = 7.3 Hz, 2H); <sup>13</sup>C{<sup>1</sup>H} NMR (100 MHz, CDCl<sub>3</sub>): δ (ppm) = 199, 165, 157.2, 136.8, 135.3, 134.8, 133, 130.8, 130.3, 130, 129.6, 128.5, 128, 127.2, 126.7, 126.3, 124.9, 114.4, 37.8, 25.9

**Propiophenone (8n)** <sup>[15]</sup>: Yield 114 mg, 85%,

<sup>1</sup>H NMR (400 MHz, CDCl<sub>3</sub>): δ (ppm) = 7.95 (d, *J* = 7.6 Hz, 2H), 7.54 (t, *J* = 7.2 Hz, 1H), 7.44 (t, *J* = 7.6 Hz, 1H), 3.0 (q, *J*<sub>1</sub> = 7.2 Hz, *J*<sub>2</sub> = 14.4 Hz, 2H), 1.22 (t, *J* = 7.6 Hz, 3H);

**1-phenylbutan-1-one (8o)** <sup>[16]</sup>: Yield 132 mg, 89%

<sup>1</sup>H NMR (400 MHz, CDCl<sub>3</sub>): δ (ppm) = 7.95 (d, *J* = 7.1 Hz, 2H), 7.53 (t, *J* = 7.3 Hz, 1H), 7.44 (t, *J* = 7.8 Hz, 2H), 2.94 (t, *J* = 7.3 Hz, 2H), 1.79-1.73 (m, 2H), 0.99 (t, *J* = 7.5 Hz, 3H);

**4-methyl-1-phenylpentan-1-one (8p)** <sup>[1]</sup>: Yield 149 mg, 84%

<sup>1</sup>H NMR (400 MHz, CDCl<sub>3</sub>): δ (ppm) = 7.95 (d, *J* = 7.1 Hz, 2H), 7.54 (t, *J* = 7.3 Hz, 1H), 7.44 (t, *J* = 7.8 Hz, 2H), 2.97-2.89 (m, 2H), 1.62 (t, *J* = 6.7 Hz, 3H), 0.94 (d, *J* = 6.1 Hz, 6H);

**1-phenylhexan-1-one (8q)** <sup>[1]</sup>: Yield 148 mg, 84%

<sup>1</sup>H NMR (400 MHz, CDCl<sub>3</sub>): δ (ppm) = 7.95 (d, *J* = 7.4 Hz, 2H), 7.56-7.52 (m, 1H), 7.44 (t, *J* = 7.6 Hz, 2H), 2.95 (t, *J* = 7.4 Hz, 2H), 1.73-1.71 (m, 2H), 1.36-1.35 (m, 4H), 0.90-0.83 (m, 3H);

**1-phenylheptan-1-one (8r)** <sup>[14]</sup>: Yield 167 mg, 88%

<sup>1</sup>H NMR (400 MHz, CDCl<sub>3</sub>): δ (ppm) = 7.94 (d, *J* = 7.6 Hz, 2H), 7.54 (t, *J* = 7.2 Hz, 1H), 7.44 (t, *J* = 7.5 Hz, 2H), 2.95 (t, *J* = 7.3 Hz, 2H), 1.74-1.68 (m, 2H), 1.37-1.30 (m, 6H), 0.88 (s, 3H);

**Ethyl 2-(3-oxo-3-phenylpropyl) thiazole-4-carboxylate(8s)**: Yield 148 mg, 51%

<sup>1</sup>H NMR (400 MHz, MeOD): δ (ppm) = 8.23 (s, 1H), 8.01 (d, *J* = 7.44 Hz, 2H), 7.60 (t, *J* = 7.44 Hz, 1H), 7.49 (t, *J* = 7.68 Hz, 2H), 4.36-4.32 (m, 2H), 3.62 (t, *J* = 6.88 Hz, 2H), 3.43 (t, *J* = 6.76 Hz, 2H), 1.38-1.27 (m, 3H), 2.32 (s, 3H). <sup>13</sup>C {<sup>1</sup>H} NMR (100 MHz, CDCl<sub>3</sub>): δ (ppm) = 197.76, 170.36, 161.31, 153.34, 146.71, 136.29, 133.30, 128.58, 128.54, 127.99, 127.24, 127.09, 61.29, 37.92, 27.41, 14.27.

**2-(3-oxo-3-phenylpropyl) thiazole-4-carboxylic acid(8s')**: Yield 65 mg, 25%

$^1\text{H}$  NMR (400 MHz, DMSO- $d_6$ ):  $\delta$  (ppm) = 12.93 (br, 1H), 8.27 (m, 1H), 8.01-7.99 (m, 1H), 7.65-7.63 (m, 1H), 7.55-7.53 (m, 2H), 3.59 (br, 2H), 3.31 (br, 2H).

***1,3-diphenylpropan-1-one(10aa)***<sup>[1]</sup>: Yield 195 mg, 93%

$^1\text{H}$  NMR (400 MHz, DMSO- $d_6$ ):  $\delta$  (ppm) = 7.98 (d,  $J$  = 7.6 Hz, 2H), 7.64-7.61 (m, 1H), 7.53-7.49 (m, 2H), 7.28-7.27 (m, 4H), 7.18-7.17 (m, 1H), 3.39 (m, 2H), 2.94 (t,  $J$  = 7.4, 2H);

***3-(2,4-dimethoxyphenyl)-1-phenylpropan-1-one (10ab)***<sup>[17]</sup>: Yield 238 mg, 88%

$^1\text{H}$  NMR (400 MHz,  $\text{CD}_3\text{OD}$ ):  $\delta$  (ppm) = 7.95-7.94 (m, 2H), 7.57 (m, 1H), 7.48-7.46 (m, 2H), 7.02 (d,  $J$  = 7.8 Hz, 1H), 6.47 (s, 1H), 6.41-6.39 (m, 1H), 3.77-3.74 (m, 6H), 3.21-3.18 (m, 2H), 2.91-2.89 (m, 2H);

***3-(2-bromo-4-fluorophenyl)-1-phenylpropan-1-one(10ac)***: Yield 255 mg, 83%

$^1\text{H}$  NMR (400 MHz,  $\text{CD}_3\text{OD}$ ):  $\delta$  (ppm) = 7.95 (d,  $J$  = 7.2 Hz, 2H), 7.58-7.56 (m, 1H), 7.49-7.46 (m, 2H), 7.36 (t,  $J$  = 7.4 Hz, 2H), 7.03 (t,  $J$  = 8.0 Hz, 1H), 3.32-3.29 (m, 2H), 3.12 (t,  $J$  = 7.2 Hz, 2H);  $^{13}\text{C}\{^1\text{H}\}$  NMR (100 MHz,  $\text{CDCl}_3$ ):  $\delta$  (ppm) = 198.7, 162.2, 159.7, 136.6, 136.3, 133, 131.5, 131.4, 128.6, 120, 119.7, 114.7, 114.5, 38.4, 29.8;

***3-(5-fluoro-2-methoxyphenyl)-1-phenylpropan-1-one (10ad)***: Yield 221 mg, 86%

$^1\text{H}$  NMR (400 MHz, MeOD):  $\delta$  (ppm) = 7.96 (d,  $J$  = 7.2 Hz, 2H), 7.59-7.56 (m, 1H), 7.47 (t,  $J$  = 7.8 Hz, 2H), 6.95-6.92 (m, 1H), 6.88-6.86 (m, 2H), 3.81 (s, 3H), 3.29 (m, 2H), 2.96 (t,  $J$  = 7.6 Hz, 2H);

$^1\text{H}$  NMR (400 MHz,  $\text{CDCl}_3$ ):  $\delta$  (ppm) = 7.96 (d,  $J$  = 7.4 Hz, 2H), 7.54-7.52 (m, 1H), 7.44 (t,  $J$  = 7.6 Hz, 2H), 6.93-6.90 (m, 1H), 6.86-6.83 (m, 1H), 6.76-6.73 (m, 1H), 3.79 (s, 3H), 3.24 (t,  $J$  = 7.2 Hz, 2H), 3.01 (t,  $J$  = 7.8 Hz, 2H);  $^{13}\text{C}\{^1\text{H}\}$  NMR (100 MHz,  $\text{CDCl}_3$ ):  $\delta$  (ppm) = 199.4, 157.96, 155.6, 153.5, 136.7, 132.9, 131.2, 131.1, 128.4, 128, 116.9, 116.7, 113.1, 113, 110.8, 110.7, 56.1, 55.6, 38.4, 25.4

***1-phenyl-3-(2-(trifluoromethoxy)phenyl)propan-1-one (10ae)***: Yield 232 mg, 79%

$^1\text{H}$  NMR (400 MHz, MeOD):  $\delta$  (ppm) = 7.98-7.96 (m, 2H), 7.60-7.57 (m, 1H), 7.49-7.46 (m, 2H), 7.41-7.39 (m, 1H), 7.29-7.24 (m, 3H), 3.34-3.29 (m, 2H), 3.08 (t,  $J$  = 7.6 Hz, 2H);  $^{13}\text{C}\{^1\text{H}\}$  NMR (100 MHz,  $\text{CDCl}_3$ ): $\delta$  (ppm) = 198.8, 147.7, 147.6, 136.6, 133.1, 131, 128.6, 127.6, 126.8, 121.9, 120.4, 119, 38.7, 24.7

***3-(4-methoxy-3-(trifluoromethyl)phenyl)-1-phenylpropan-1-one (10af)***: Yield 241 mg, 78%

$^1\text{H}$  NMR (400 MHz, DMSO- $d_6$ ):  $\delta$  (ppm) = 7.98 (d,  $J$  = 7.4 Hz, 2H), 7.64-7.61 (m, 1H), 7.53-7.49 (m, 4H), 7.16 (d,  $J$  = 8.4 Hz, 1H), 3.84 (s, 3H), 3.40-3.30 (m, 2H), 3.03 (t,  $J$  = 7.2 Hz, 2H);  $^{13}\text{C}\{^1\text{H}\}$  NMR (100 MHz,  $\text{CDCl}_3$ ): $\delta$  (ppm) = 198.8, 155.8, 136.7, 133.18, 133.1, 132.9, 128.6, 127.9, 126.9, 126.8, 124.9, 122.2, 118.7, 118.4, 112.1, 55.9, 40.2, 28.9;

***3-(4-chloro-2-fluorophenyl)-1-phenylpropan-1-one (10ag)***: Yield 213 mg, 81%

$^1\text{H}$  NMR (400 MHz, MeOD):  $\delta$  (ppm) = 7.96 (d,  $J$  = 7.4 Hz, 2H), 7.60-7.56 (m, 1H), 7.49-7.45 (m, 2H), 7.29 (t,  $J$  = 8.6 Hz, 1H), 7.11 (t,  $J$  = 7.8 Hz, 2H), 3.35-3.29 (m, 2H), 3.02 (t,  $J$  = 7.4 Hz, 2H);  $^{13}\text{C}\{^1\text{H}\}$  NMR (100 MHz,  $\text{CDCl}_3$ ): $\delta$  (ppm) = 198.64, 162.1, 159.6, 136.5, 133.1, 132.8, 132.5, 131.6, 131.5, 128.5, 128.3, 128.1, 128, 126.7, 124.3, 116.1, 115.8, 38.4, 23.3, 23.2;

***3-(3-bromo-5-methylphenyl)-1-phenylpropan-1-one (10ah)***: Yield 252 mg, 83%

$^1\text{H}$  NMR (400 MHz, MeOD):  $\delta$  (ppm) = 7.96 (d,  $J$  = 7.4 Hz, 2H), 7.58 (t,  $J$  = 7.4 Hz, 1H), 7.47 (t,  $J$  = 7.6 Hz, 2H), 7.21 (s, 1H), 7.15 (s, 1H), 7.04 (s, 1H), 3.34-3.30 (m, 2H), 2.95 (t,  $J$  = 7.4 Hz, 2H), 2.27 (s, 3H);  $^{13}\text{C}\{^1\text{H}\}$  NMR (100 MHz,  $\text{CDCl}_3$ ): $\delta$  (ppm) = 198.6, 143.3, 140.1, 136.6, 133.1, 129.8, 128.5, 128.3, 128.0, 127.9, 122.2, 40.0, 29.5, 21.0;

***3-(5-chloro-2-fluorophenyl)-1-phenylpropan-1-one (10ai)***: Yield 245 mg, 92%

$^1\text{H}$  NMR (400 MHz, DMSO- $d_6$ ):  $\delta$  (ppm) = 7.99 (d,  $J$  = 7.4 Hz, 2H), 7.63 (t,  $J$  = 7.2 Hz, 1H), 7.54-7.48 (m, 3H), 7.32-7.28 (m, 1H), 7.20 (t,  $J$  = 9.2 Hz, 1H), 3.40 (t,  $J$  = 7.4 Hz, 2H), 2.94 (t,  $J$  = 7.2 Hz, 2H);  $^{13}\text{C}\{^1\text{H}\}$  NMR (100 MHz,  $\text{CDCl}_3$ ): $\delta$  (ppm) = 198.3, 160.9, 158.5, 136.5, 133.1, 130.69, 130.64, 129.9, 129.8, 128.96, 128.93, 128.6, 127.9, 127.79, 127.0, 116.6, 116.4, 38.3, 23.6;

***1-phenylhexan-1-one (10aj)***<sup>[1]</sup>: Yield 148 mg, 84%

$^1\text{H}$  NMR (400 MHz, MeOD):  $\delta$  (ppm) = 7.97-7.95 (m, 2H), 7.60-7.56 (m, 1H), 7.48 (t,  $J$  = 7.8 Hz, 2H), 3.0 (t,  $J$  = 7.4 Hz, 2H), 1.73-1.66 (m, 2H), 1.39-1.32 (m, 4H), 0.94-0.90 (m, 3H);

**1-phenyl-3-(pyridin-2-yl)propan-1-one (10ak)** <sup>[12]</sup>: Yield 170 mg, 80%

<sup>1</sup>H NMR (400 MHz, DMSO-d<sub>6</sub>): δ (ppm) = 8.44-8.43 (m, 1H), 7.98 (d, *J* = 7.4 Hz, 2H), 7.70-7.68 (m, 1H), 7.63 (t, *J* = 7.2 Hz, 1H), 7.52 (t, *J* = 7.6 Hz, 2H), 7.33 (d, *J* = 7.6 Hz, 1H), 7.19-7.16 (m, 1H), 3.49 (t, *J* = 7.08 Hz, 2H), 3.11 (t, *J* = 7.08 Hz, 2H)

**3-(6-methoxy-pyridin-3-yl)-1-phenylpropan-1-one (10al)**: Yield 209 mg, 87%

<sup>1</sup>H NMR (400 MHz, MeOD): δ (ppm) = 7.99-7.95 (m, 3H), 7.62-7.56 (m, 2H), 7.47 (t, *J* = 7.6 Hz, 2H), 6.71 (d, *J* = 8.4 Hz, 1H), 3.85 (s, 3H), 3.35-3.29 (m, 2H), 2.96 (t, *J* = 7.2 Hz, 2H); <sup>13</sup>C {<sup>1</sup>H} NMR (100 MHz, CDCl<sub>3</sub>): δ (ppm) = 198.7, 162.7, 146, 139, 136.6, 133.1, 129.1, 128.5, 128.3, 128, 127.9, 127.3, 125, 110, 53.2, 40, 26.1;

**3-phenyl-1-(p-tolyl)propan-1-one (10ba)** <sup>[14]</sup>: Yield 201 mg, 89%

<sup>1</sup>H NMR (400 MHz, MeOD): δ (ppm) = 7.86 (d, *J* = 8.0 Hz, 2H), 7.29-7.23 (m, 6H), 7.16-7.14 (m, 1H), 3.29-3.27 (m, 2H), 2.99 (t, *J* = 7.6 Hz, 2H), 2.38 (s, 3H);

**1-(p-tolyl)hexan-1-one (10bj)** <sup>[18]</sup>: Yield 165 mg, 86%

<sup>1</sup>H NMR (400 MHz, MeOD): δ (ppm) = 7.86 (d, *J* = 7.8 Hz, 2H), 7.29 (d, *J* = 7.6 Hz, 2H), 2.96 (t, *J* = 7.2 Hz, 2H), 2.39 (s, 3H), 1.68-1.66 (m, 2H), 1.44-1.21 (m, 4H), 0.97-0.90 (m, 3H);

**1-(4-methoxyphenyl)-3-phenylpropan-1-one (10ca)** <sup>[14]</sup>: Yield 195 mg, 81%

<sup>1</sup>H NMR (400 MHz, MeOD): δ (ppm) = 7.95 (d, *J* = 8.8 Hz, 2H), 7.24-7.23 (m, 4H), 7.15-7.14 (m, 1H), 6.96 (d, *J* = 7.8 Hz, 1H), 3.85 (s, 2H), 3.29-3.25 (m, 2H), 2.98 (t, *J* = 7.4 Hz, 2H);

**1-(4-methoxyphenyl) hexan-1-one (10cj)** <sup>[19]</sup>: Yield 178 mg, 86%

<sup>1</sup>H NMR (400 MHz, MeOD): δ (ppm) = 7.95 (d, *J* = 8.8 Hz, 2H), 6.99 (d, *J* = 8.8 Hz, 2H), 3.86 (s, 3H), 2.94 (t, *J* = 7.4 Hz, 2H), 1.70-1.66 (m, 2H), 1.37-1.33 (m, 4H), 0.93-0.89 (m, 3H);

**3-phenyl-1-(pyridin-3-yl) propan-1-one (10da)** <sup>[5]</sup>: Yield 181 mg, 85%

<sup>1</sup>H NMR (400 MHz, DMSO-d<sub>6</sub>): δ (ppm) = 9.13 (s, 1H), 8.87-8.77 (m, 1H), 8.31 (d, *J* = 8.0 Hz, 1H), 7.56-7.53 (m, 1H), 7.29-7.28 (m, 4H), 7.18-7.17 (m, 1H), 3.43 (t, *J* = 7.4 Hz, 2H), 2.94 (t, *J* = 7.4 Hz, 2H);

**3-phenyl-1-(pyridin-4-yl)propan-1-one (10ea)** <sup>[5]</sup>: Yield 191 mg, 90%

<sup>1</sup>H NMR (400 MHz, DMSO-d<sub>6</sub>): δ (ppm) = 8.79 (d, *J* = 4.4 Hz, 2H), 7.83 (d, *J* = 4.4 Hz, 2H), 7.33-7.27 (m, 4H), 7.19-7.18 (m, 1H), 3.42 (t, *J* = 7.2 Hz, 2H), 2.94 (t, *J* = 7.2 Hz, 2H);

**1-(naphthalen-1-yl)-3-phenylpropan-1-one (10fa)** <sup>[1]</sup>: Yield 224 mg, 86%

<sup>1</sup>H NMR (400 MHz, CDCl<sub>3</sub>): δ (ppm) = 8.53 (d, *J* = 8.2 Hz, 1H), 7.96 (d, *J* = 8.2 Hz, 1H), 7.88 (d, *J* = 7.8 Hz, 1H), 7.81 (d, *J* = 7.08 Hz, 1H), 7.60-7.50 (m, 2H), 7.46 (t, *J* = 7.6 Hz, 1H), 7.31-7.24 (m, 4H), 7.21-7.18 (m, 4H), 3.42 (t, *J* = 8.4 Hz, 2H), 3.13 (t, *J* = 7.8 Hz, 2H);

**3-(3,4-dimethoxyphenyl)-1-(naphthalen-1-yl)propan-1-one (10fm)** <sup>[20]</sup>: Yield 259 mg, 81%

<sup>1</sup>H NMR (400 MHz, DMSO-d<sub>6</sub>): δ (ppm) = 8.39 (d, *J* = 7.6 Hz, 1H), 8.12 (d, *J* = 9.2 Hz, 1H), 8.07 (d, *J* = 6.8 Hz, 1H), 8.0 (s, 1H), 7.61-7.57 (m, 3H), 6.87 (s, 1H), 3.69 (s, 6H), 3.42 (t, *J* = 7.2 Hz, 2H), 2.94 (t, *J* = 7.2 Hz, 2H);

**3-phenyl-1-(pyridin-3-yl)propan-1-ol (10da')** <sup>[10]</sup>: Yield 90 mg, 42%, 2h

<sup>1</sup>H NMR (400 MHz, DMSO-d<sub>6</sub>): δ (ppm) = 8.52 (s, 1H), 8.44 (d, *J* = 3.6 Hz, 1H), 7.73 (d, *J* = 7.8 Hz, 1H), 7.36-7.33 (m, 1H), 7.28-7.24 (m, 2H), 7.19-7.14 (m, 3H), 5.44 (d, *J* = 3.6 Hz, 1H), 4.60-4.57 (m, 1H), 2.67-2.63 (m, 1H), 2.61-2.56 (m, 1H), 1.92-1.90 (m, 2H);

**3-phenyl-1-(pyridin-4-yl)propan-1-ol (10ea')** <sup>[21]</sup>: Yield 75 mg, 35%, 2h

<sup>1</sup>H NMR (400 MHz, DMSO-d<sub>6</sub>): δ (ppm) = 8.49 (d, *J* = 5.6 Hz, 2H), 7.34-7.33 (m, 2H), 7.28-7.24 (m, 2H), 7.19-7.14 (m, 3H), 5.51 (d, *J* = 4.8 Hz, 1H), 4.56-4.53 (m, 1H), 2.66-2.60 (m, 2H), 1.91-1.82 (m, 2H);

2,5-dibenzylcyclopentan-1-one (12aa) <sup>[22]</sup>: Yield 246 mg 93%

<sup>1</sup>H NMR (400 MHz, CDCl<sub>3</sub>): δ (ppm) = 7.27-7.23 (m, 2H), 7.19-7.15 (m, 2H), 7.14-7.12 (m, 6H), 3.18-3.14 (dd,  $J_1 = 4.2$  Hz,  $J_2 = 13.8$  Hz, 2H), 2.62-2.56 (m, 2H), 2.31-2.24 (m, 2H), 2.0-1.94 (m, 2H), 1.41-1.36 (m, 2H);

<sup>1</sup>H NMR (400 MHz, MeOD): δ (ppm) = 7.26-7.22 (m, 4H), 7.18-7.11 (m, 6H), 2.95-2.90 (dd,  $J_1 = 3.6$  Hz,  $J_2 = 13.6$  Hz, 2H), 2.54 (m, 2H), 2.47-2.42 (m, 2H), 1.89-1.79 (m, 2H), 1.56-1.53 (m, 2H);

2,6-dibenzylcyclohexan-1-one (12ab)<sup>[9]</sup>: *Yield 253 mg, 91%*

<sup>1</sup>H NMR (400 MHz, MeOD): δ (ppm) = 7.38-7.24 (m, 4H), 7.22-7.13 (m, 6H), 3.15-3.10 (dd,  $J_1 = 4.8$  Hz,  $J_2 = 13.8$  Hz, 2H), 2.73-2.76 (m, 2H), 2.40-2.34 (m, 2H), 2.02-2.00 (m, 2H), 1.77-1.73 (m, 1H), 1.62-1.56 (m, 1H), 1.32-1.28 (m, 2H);

2,7-dibenzylcycloheptan-1-one (12ac)<sup>[23]</sup>: *Yield 213 mg, 73%*

<sup>1</sup>H NMR (400 MHz, MeOD): δ (ppm) = 7.22-7.18 (m, 4H), 7.14 (d,  $J = 7.2$  Hz, 2H), 7.01-6.99 (m, 4H), 2.80-2.76 (m, 2H), 2.68-2.63 (m, 2H), 4.50-2.45 (m, 2H), 1.83-1.76 (m, 4H), 1.34-1.25 (m, 2H), 1.23-1.18 (m, 2H);

2-benzylcycloheptan-1-one (12ac')<sup>[24]</sup>: *Yield 27 mg, 15%*

<sup>1</sup>H NMR (400 MHz, MeOD): δ (ppm) = 7.25-7.21 (m, 2H), 7.15-7.13 (m, 3H), 3.0-2.95 (m, 1H), 2.91-2.85 (m, 1H), 2.57-2.52 (m, 1H), 2.44-2.41 (m, 2H), 1.85-1.78 (m, 4H), 1.68-1.59 (m, 1H), 1.37-1.26 (m, 3H);

2,8-dibenzylcyclooctan-1-one (12ad)<sup>[22]</sup>: *Yield 220 mg, 72%*

<sup>1</sup>H NMR (400 MHz, MeOD): δ (ppm) = 7.17-7.15 (m, 4H), 7.12-7.10 (m, 2H), 7.05-7.03 (m, 4H), 3.07-3.02 (m, 2H), 2.95-2.92 (m, 2H), 2.48-2.43 (m, 2H), 1.79 (m, 2H), 1.60 (m, 3H), 1.46 (m, 2H), 1.40-1.28 (m, 3H);

2-benzylcyclooctan-1-one (12ad')<sup>[25]</sup>: *Yield 54 mg, 25%*

<sup>1</sup>H NMR (400 MHz, MeOD): δ (ppm) = 7.24-7.20 (m, 2H), 7.15-7.11 (m, 3H), 3.03-3.01 (m, 1H), 2.91-2.86 (m, 1H), 2.64-2.59 (m, 1H), 2.31-2.24 (m, 1H), 2.14-2.11 (m, 1H), 2.09-2.01 (m, 1H), 1.89-1.84 (m, 1H), 1.76-1.74 (m, 1H), 1.71-1.58 (m, 4H), 1.51-1.45 (m, 1H), 1.44-1.39 (m, 1H), 1.20-1.18 (m, 1H);



***H-indole (14): Yield: 2.45 g, 96% (22 mmol scale reaction).***

<sup>1</sup>H NMR (400 MHz, DMSO): δ (ppm) = 11.05 (s, 1H), 7.53 (d, *J* = 7.7 Hz, 1H), 7.38 (t, *J* = 7.3 Hz, 1H), 7.32-7.31 (m, 1H), 7.06 (t, *J* = 7.2 Hz, 1H), 6.97 (t, *J* = 7.5 Hz, 1H), 6.41 (br, 1H).

## **5. Characterization data of controlled experiments (10, 10a, 10b & 7bd):**

***Benzaldehyde (10):***

<sup>1</sup>H NMR (400 MHz, CDCl<sub>3</sub>): δ (ppm) = 10.01 (s, 1H), 7.87 (d, *J* = 6.9 Hz, 2H), 7.54-7.44 (m, 3H);

***2-fluorobenzaldehyde (10b):***

<sup>1</sup>H NMR (400 MHz, CDCl<sub>3</sub>): δ (ppm) = 10.36 (s, 1H), 7.86 (t, *J* = 7.2 Hz, 1H), 7.62-7.57 (m, 1H), 7.25 (t, *J* = 7.5 Hz, 1H), 7.16 (t, *J* = 8.9 Hz, 1H);

***2-hydroxybenzaldehyde (10c):***

<sup>1</sup>H NMR (400 MHz, CDCl<sub>3</sub>): δ (ppm) = 11.0 (s, 1H), 9.89 (s, 1H), 7.56-7.50 (m, 2H), 7.03-6.97 (m, 2H).

***chalcone (7bd):***

<sup>1</sup>H NMR (400 MHz, DMSO-d<sub>6</sub>): δ (ppm) = 7.88 (d, *J* = 7.7 Hz, 1H), 7.71 (s, 1H), 7.53-7.41 (m, 3H), 7.30-7.14 (m, 7H).

<sup>1</sup>H NMR (400 MHz, CDCl<sub>3</sub>): δ (ppm) = 7.79 (m, 2H), 7.55-7.53 (m, 1H), 7.47-7.42 (m, 1H), 7.39-7.30 (m, 5H), 7.21-7.12 (m, 4H).

## **6. Crystallographic data and refinement details of 4a-Ir**

A Bruker SMART APEX-II area detector single crystal X-ray diffractometer was used to collect the X-ray diffraction data of suitable crystal of **picolinamidato complex 4a-Ir** using monochromatic Cu K $\alpha$ , ( $\lambda$  = 1.54178 Å) with the  $\omega$  and  $\phi$  scan technique. The data collection of **4a-Ir** was done by using Bruker SAINT system and the data were corrected for absorption using Bruker SADABS<sup>[26]</sup> software. The structure of **4a-Ir** was solved using olex2.solve 1.5<sup>[27]</sup> and was refined by full matrix least squares based on  $F^2$  using SHELXL-2018/3<sup>[28]</sup>. All non-hydrogen

atoms were refined anisotropically and the H atoms bonded to carbon atoms were included at calculated positions as riding atoms with C(sp<sup>2</sup>)-H distances of 0.95 Å and C(sp<sup>3</sup>)-H distances of 0.98 Å whereas the hydrogen atoms of water molecule were located from respective Q-peaks. ORTEP-plot and packing diagram were generated with ORTEP-3 for Windows [28d]. WinGX [28d] was used to prepare the material for publication. CCDC reference number **2165585** contains supplementary crystallographic data for this paper. Crystal data, data collection and structure refinement details of the complex have been summarized in **table S1**.

To prepare suitable single crystal of picolinamidato complex 4a-Ir, slow evaporation of the methanolic solution was followed. The Complex crystallizes in monoclinic space group *P2<sub>1</sub>/n*. The selected bond lengths and bond angles are presented in **table S2** while the intermolecular hydrogen bonding interactions are presented in **table S3 & figure S2**. **Figure S1** represents the ORTEP view of asymmetric unit of 4a-Ir. Crystal packing diagram of 4a-Ir has been shown in **figure S3** in the supplementary section. X-ray crystallography showed that the asymmetric unit possesses half-sandwich pseudo-octahedral “three-legged piano-stool” structures, with Cp\* as the seat and three coordination positions are occupied by neutral N,N-chelating picolinamide ligand and a terminal chloride. Each asymmetric unit experiences one intermolecular classical O-H...Cl type hydrogen bonding between uncoordinated water molecule and Cl atom bonded to the central metal ion with a bond distance 3.335(3) Å while two other intermolecular nonclassical C-H...O type hydrogen bonding interactions with the distances 3.228(4) Å, 3.488(4) Å are shown in **figure S2 & table S3**. Here in, the picolinamide ligand bind to the metal center through the amine nitrogen and the pyridine N forming a five member chelate ring with an angle of N1-Ir1-N2 76.40°, indicating a distortion from the regular octahedron, in analogy with similar Cp\*Ir(III) Complexes bearing a picolinamide ligand and Ru-arenethiosemicarbazone complexes. [29]. The dihedral angle between the naphthalene ring plane and the picoline moiety is around -176.9°. Notably, this type of ligand adopts a flat conformation [30] but owing to exceptional metal coordination sites, it's coplanarity is lost. The T-shaped edge-to-face stacking orientation of the complex is developed through intramolecular C-H...π interactions between two hydrogen atoms (H24B and H25B) of the Cp\* ring and the π electron density from the naphthalene ring Cg3 and Cg4 of the picolinamide ligand (distances from 2.74 to 2.82 Å).

Figure S1. The ORTEP diagram of 4a-Ir with ellipsoid of 50% probability.

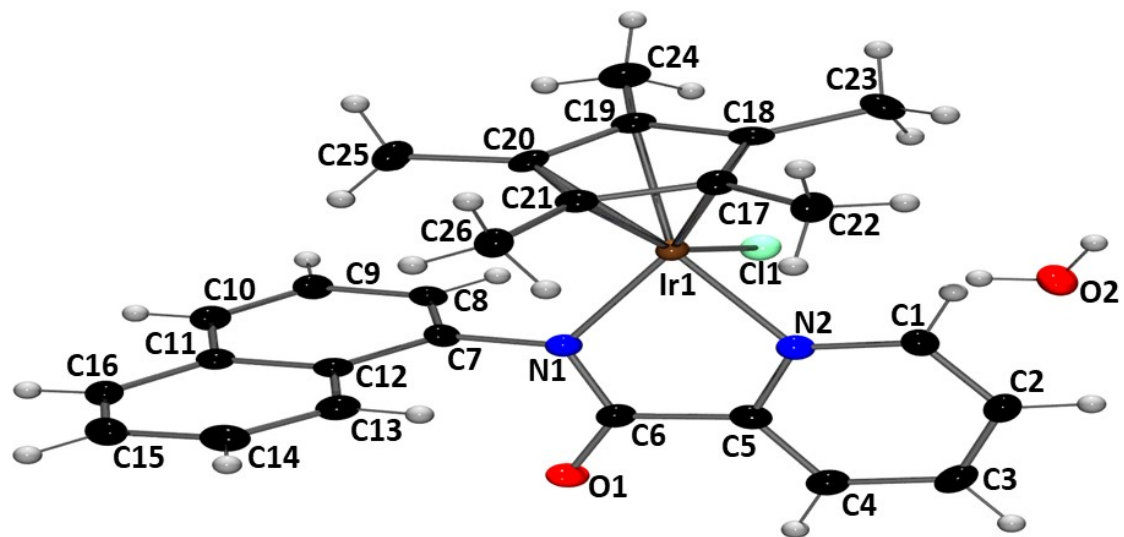

**Figure S2.** Intermolecular hydrogen bonding interactions in **4a-Ir** along *b* axis.

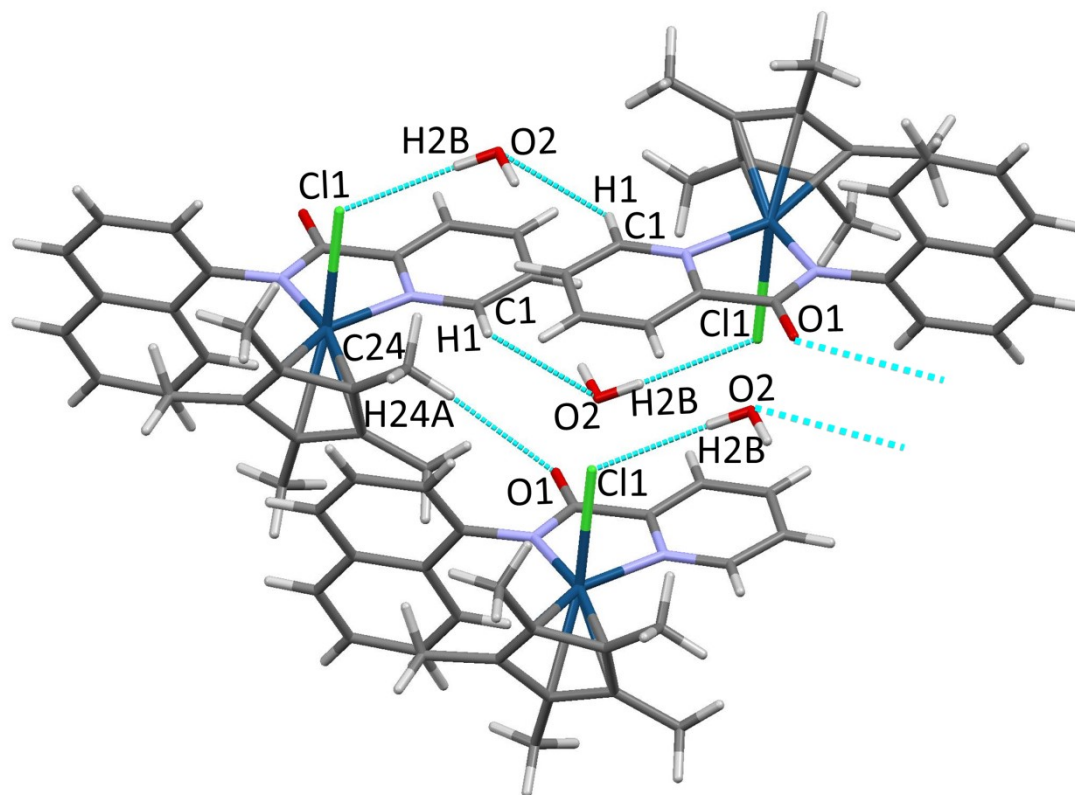

Figure S3. Molecular packing diagram of **4a-Ir** in *bc* plane.

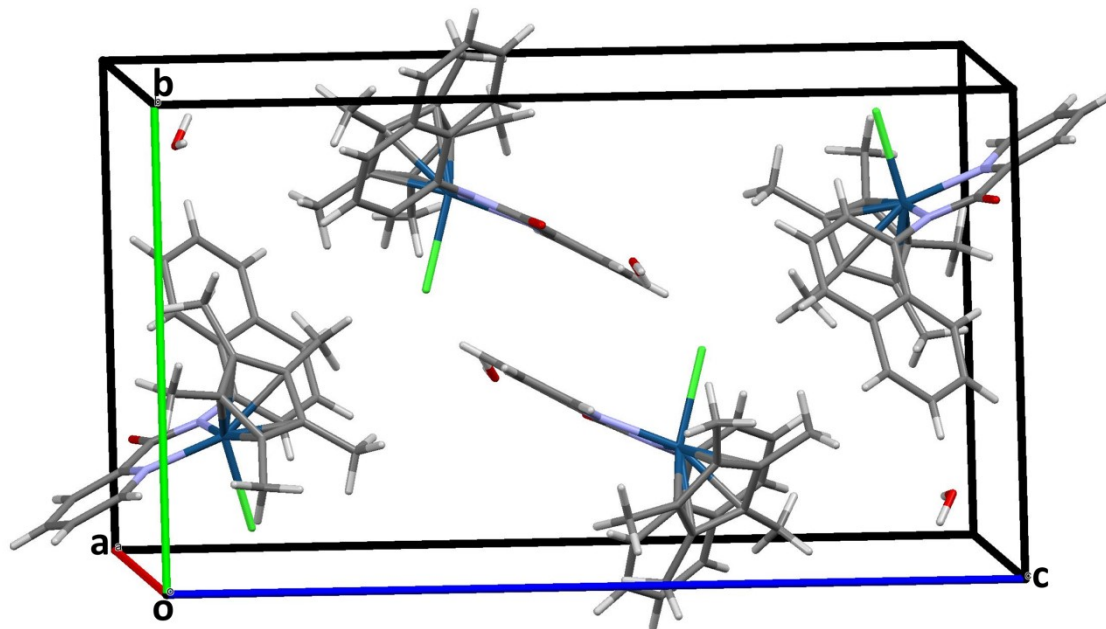

## Tables

**Table S1: Crystal data collection and structure refinement for 4a-Ir**

---

Crystal data

---

|                       |                              |
|-----------------------|------------------------------|
| CCDC reference number | <b>2165585</b>               |
| Empirical formula     | $C_{26}H_{22}ClIrN_2O_2$     |
| Moiety formula        | $C_{26}H_{26}ClIrN_2O, H_2O$ |
| Formula weight        | 622.10                       |
| Crystal system        | Monoclinic                   |
| Space group           | $P 2_1/n$                    |
| Colour, habit         | Orange red, block            |
| Size, mm              | $0.2 \times 0.12 \times 0.1$ |

Unit cell dimensions

$$a = 9.4305(7) \text{ \AA}$$

$$b = 11.9858(9) \text{ \AA}$$

$$c = 20.8802(17) \text{ \AA}$$

$$\alpha = 90^\circ$$

|                                          |                                  |
|------------------------------------------|----------------------------------|
|                                          | $\beta = 100.870(2)^\circ$       |
|                                          | $\gamma = 90^\circ$              |
| Volume $\text{\AA}^3$                    | 2317.8(3)                        |
| Z                                        | 4                                |
| Density (calculated), $\text{Mg/m}^3$    | 1.783                            |
| Absorption coefficient, $\text{mm}^{-1}$ | 12.417                           |
| F(000)                                   | 1232.0                           |
| Data collection                          |                                  |
| Temperature, K                           | 101.00                           |
| Theta range for data collection          | $8.544^\circ$ to $136.492^\circ$ |
| Index ranges                             |                                  |
|                                          | $-11 \leq h \leq 11$             |
|                                          | $-14 \leq k \leq 14$             |
|                                          | $-25 \leq l \leq 23$             |
| Reflections collected                    | 39503                            |
| Unique reflections                       | 4246                             |
| Observed reflections ( $>2\sigma(I)$ )   | 4099                             |
| $R_{\text{int}}$                         | 0.0486                           |

Completeness to  $\theta$ , %      68.246, 97.7%

Absorption correction      SADABS-2016/2  
(Bruker,2016/2)

$T_{\min} = 0.209$ ,  $T_{\max} = 0.289$

#### Refinement

Refinement method      Full-matrix least-squares on  $F^2$

Data / restraints / parameters      4146 / 0 / 298

Goodness-of-fit on  $F^2$       1.198

Final R indices [  $I > 2\sigma(I)$  ]       $R_1 = 0.0303$ ,  $wR_2 = 0.0837$

R indices (all data)       $R_1 = 0.0306$ ,  $wR_2 = 0.0839$

Largest diff. peak and hole      1.07 and -1.54 e.Å<sup>-3</sup>

---



**Table S2: Selected bond lengths (Å), bond angles (°) and torsion angles (°) for 4a-Ir**

| Compound        | Bond lengths (Å)  |            |                   |            |
|-----------------|-------------------|------------|-------------------|------------|
| 4a-Ir           | Ir(1)-N(1)        | 2.096(4)   | Ir(1)-N(2)        | 2.090(3)   |
|                 | Ir(1)-C(17)       | 2.180(3)   | Ir(1)-C(18)       | 2.177(3)   |
|                 | Ir(1)-C(19)       | 2.170(4)   | Ir(1)-C(20)       | 2.169(3)   |
|                 | Ir(1)-C(21)       | 2.156(3)   | Ir(1)-Cl(1)       | 2.4368(8)  |
| Bond angles (°) |                   |            |                   |            |
| 4a-Ir           | N(1)-Ir(1)-N(2)   | 76.40(12)  | N(1)-Ir(1)-C(17)  | 103.57(12) |
|                 | N(2)-Ir(1)-C(17)  | 156.90(11) | N(1)-Ir(1)-C(18)  | 130.71(14) |
|                 | N(2)-Ir(1)-C(18)  | 152.24(12) | N(1)-Ir(1)-C(19)  | 168.64(15) |
|                 | N(2)-Ir(1)-C(19)  | 114.43(14) | N(1)-Ir(1)-C(20)  | 139.58(11) |
|                 | N(2)-Ir(1)-C(20)  | 99.91(11)  | N(1)-Ir(1)-C(21)  | 106.78(11) |
|                 | N(2)-Ir(1)-C(21)  | 118.15(11) | N(1)-Ir(1)-Cl(1)  | 87.17(7)   |
|                 | N(2)-Ir(1)-Cl(1)  | 82.65(7)   | C(17)-Ir(1)-Cl(1) | 120.43(9)  |
|                 | C(18)-Ir(1)-Cl(1) | 91.93(10)  | C(19)-Ir(1)-Cl(1) | 97.35(9)   |
|                 | C(20)-Ir(1)-Cl(1) | 132.82(9)  | C(21)-Ir(1)-Cl(1) | 156.82(9)  |

**Table S3: Hydrogen bonded geometries in 4a-Ir**

| Compound | Bond                              | D-H(Å) | H···A(Å) | D···A(Å) | D-H···A(°) |
|----------|-----------------------------------|--------|----------|----------|------------|
| 4a-Ir    | O(2)-H(2B)···Cl(1)                | 0.87   | 2.48     | 3.335(3) | 169        |
|          | C(1)-H(1)···O(2) <sup>i</sup>     | 0.95   | 2.55     | 3.228(4) | 129        |
|          | C(24)-H(24A)···O(1) <sup>ii</sup> | 0.98   | 2.54     | 3.488(4) | 163        |

Symmetry codes: (i) 2-x, 1--y, 1-z; (ii) 1+x, y, z

## 7. Copies of $^1\text{H}$ NMR, $^{13}\text{C}$ NMR Spectra

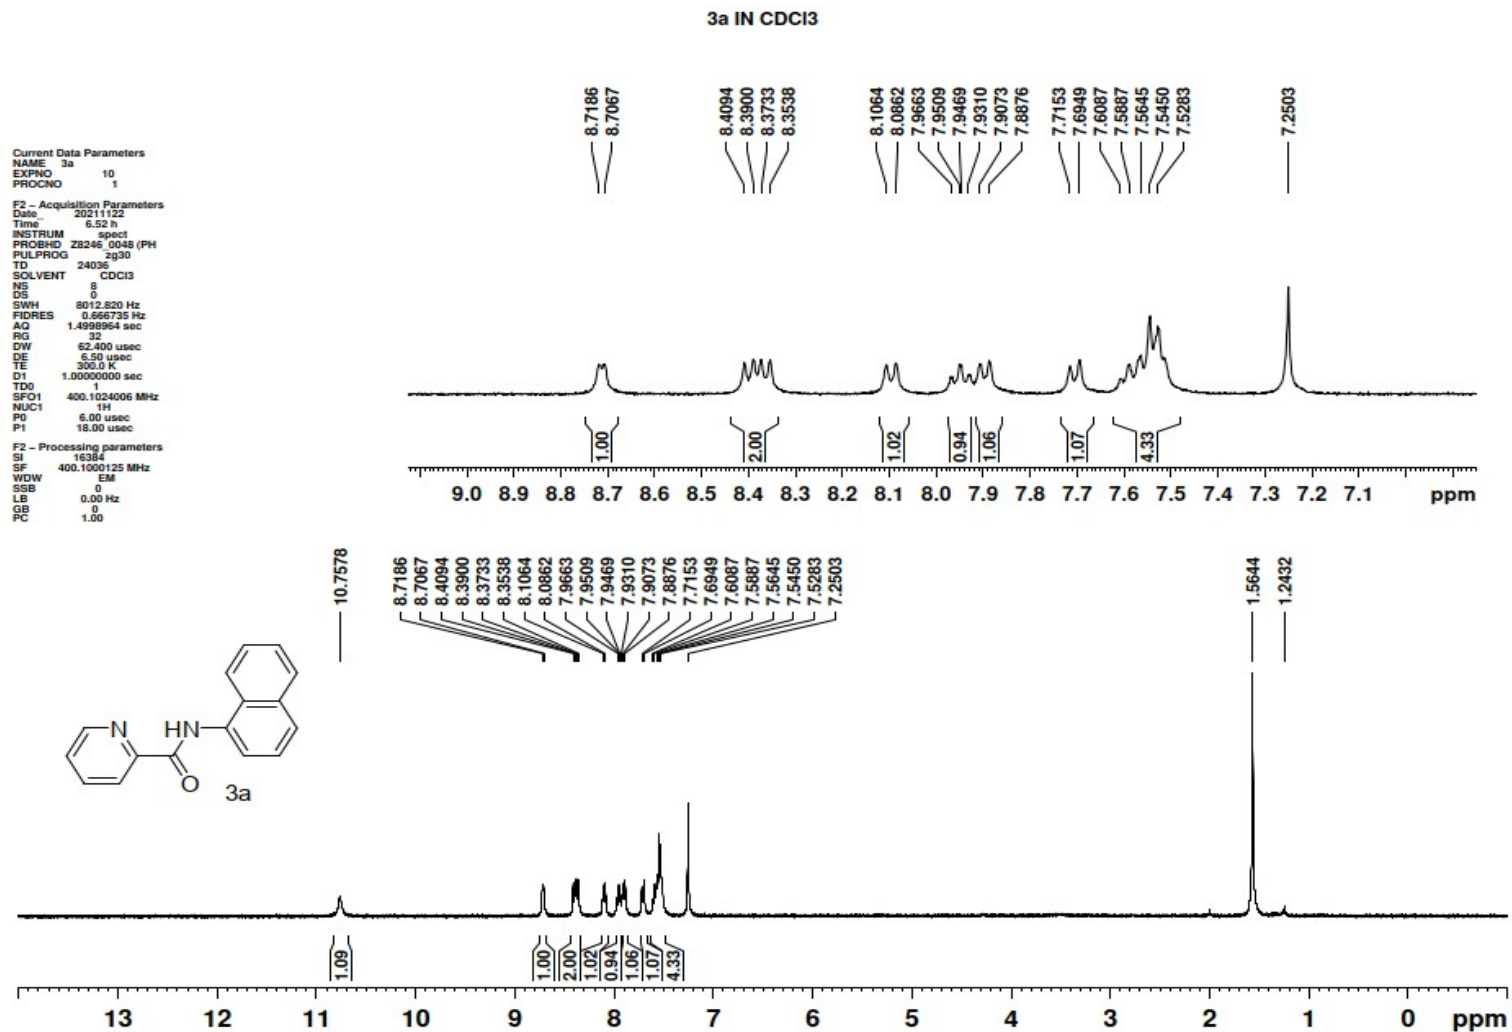

3a IN CDC13-13C

```

Current Data Parameters
NAME      3a
EXPNO    1
PROCNO   1

F2 - Acquisition Parameters
Date_    20111118
Time     15.58 h
INSTRUM  spect
PROBHD   zgpg30
PULPROG  zgpg30
TD       32768
SOLVENT  CDCl3
NS       160
DS       4
SWH      23252.325 Hz
FIDRES   1.541292 Hz
AQ       0.6488046 sec
RG       256.0
DM       19.800 usec
DE       6.50 usec
TE       300.2 K
D1       2.00000000 sec
d11      0.03000000 sec
TSD      100.6228890 MHz
SFO1     130
NUC1      13C
PC       2.47 usec
PI       8.00 usec
PLW1     80.42400360 W
SFO2     400.1714007 MHz
NUC2      1H
CPDPRG2  waltz160
PCPD2    90.00 usec
PLW2     21.70599971 W
PLW3     0.17188901 W
PLW13    0.08645400 W

F2 - Processing parameters
SI       14384
SF       100.6228892 MHz
WDW      EM
SSB      0
LB       1.00 Hz
GB       0
PC       1.40
    
```

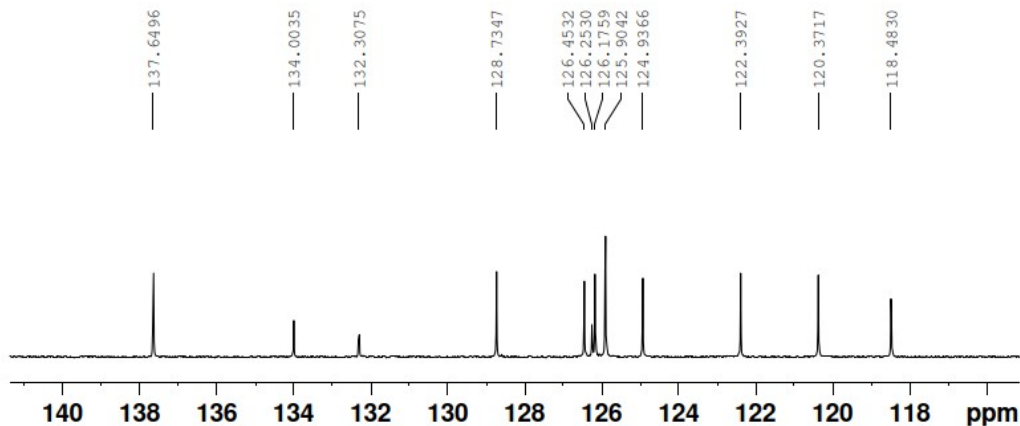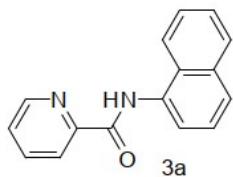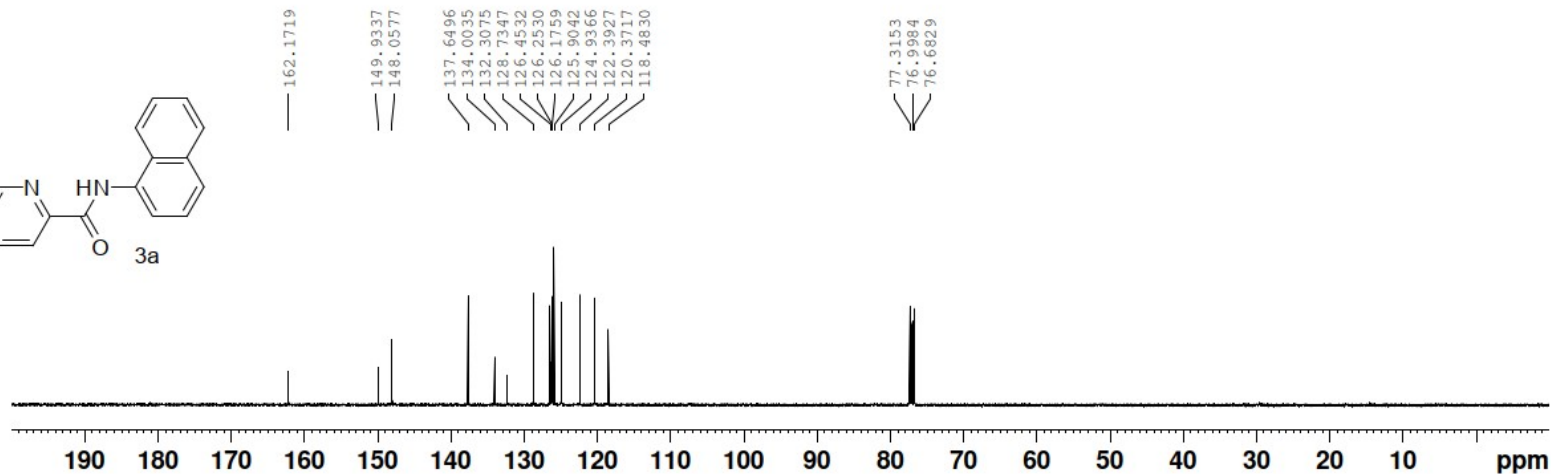

3a IN CDC13-APT

```

Current Data Parameters
NAME 3a
EXPNO 61
PROCNO 1

F2 - Acquisition Parameters
Date_ 20111216
Time 11.07 h
INSTRUM spect
PROBHD E143739.0142 (
PULPROG zgpg
TD 13746
SOLVENT CDC13
NS 183
DS 4
SWH 25232.525 Hz
FIDRES 1.541290 Hz
AQ 0.6488064 sec
RG 308.6
RW 19.800 usec
DE 6.50 usec
TE 296.1 K
CMT2 145.000000
CMT11 1.000000
D1 2.0000000 sec
D10 0.00689655 sec
TSD 1
SFO1 100.628888 MHz
NUC1 13C
P1 8.00 usec
P2 16.00 usec
PL1 80.4540360 W
PL2 400.1714007 MHz
NUC2 1H
CROSSP2 waltz16
PCPD2 90.00 usec
PL12 21.71339971 W
PL12 0.17188001 W

F2 - Processing parameters
SI 16384
SF 100.628882 MHz
WDW EM
SSB 0
LB 1.00 Hz
GB 0
PC 1.40
    
```

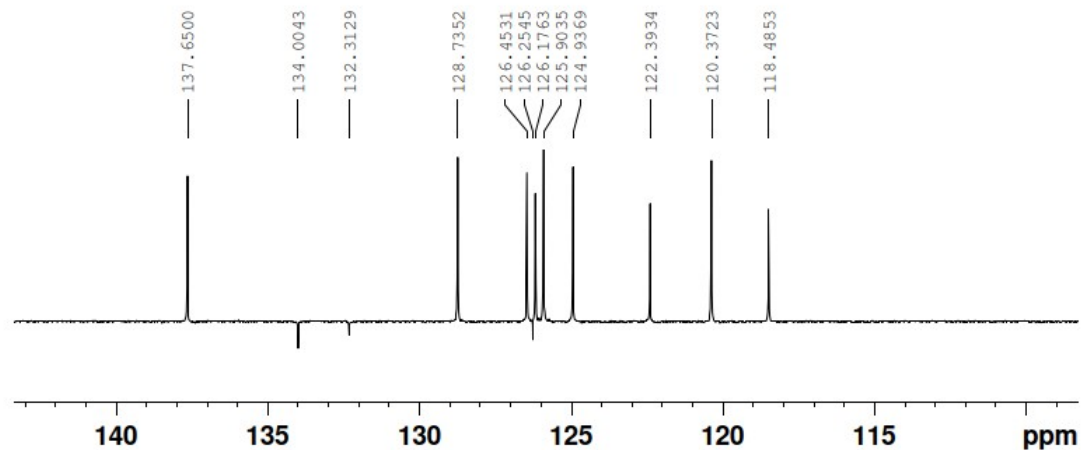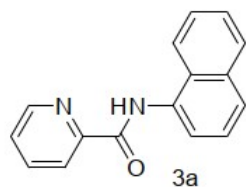

162.1726  
 149.9352  
 148.0567  
 137.6500  
 134.0043  
 132.3129  
 128.7352  
 126.4531  
 126.2545  
 126.1763  
 125.9035  
 124.9369  
 122.3934  
 120.3723  
 118.4853  
 77.3142  
 76.9949  
 76.6802

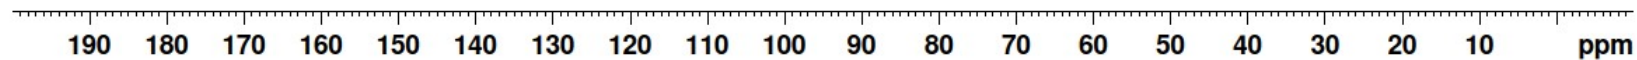

3b IN CDCI3

Current Data Parameters  
 NAME 3b  
 EXPNO 10  
 PROCNO 1

F2 - Acquisition Parameters  
 Date 20211122  
 Time 6.50 h  
 INSTRUM spect  
 PROBHD ZB246 0048 (PH)  
 PULPROG zg30  
 TD 24036  
 SOLVENT CDCl3  
 NS 8  
 DS 0  
 SWH 8012.820 Hz  
 FIDRES 0.666735 Hz  
 AQ 1.4998964 sec  
 RG 32  
 DW 62.400 usec  
 DE 6.50 usec  
 TE 300.0 K  
 D1 1.0000000 sec  
 TD0 1  
 SFO1 400.1024006 MHz  
 NUC1 1H  
 PO 6.00 usec  
 P1 18.00 usec

F2 - Processing parameters  
 SI 16384  
 SF 400.1000129 MHz  
 EM 4  
 WDW 0  
 SSB 0  
 LB 0.00 Hz  
 GB 0  
 PC 1.00

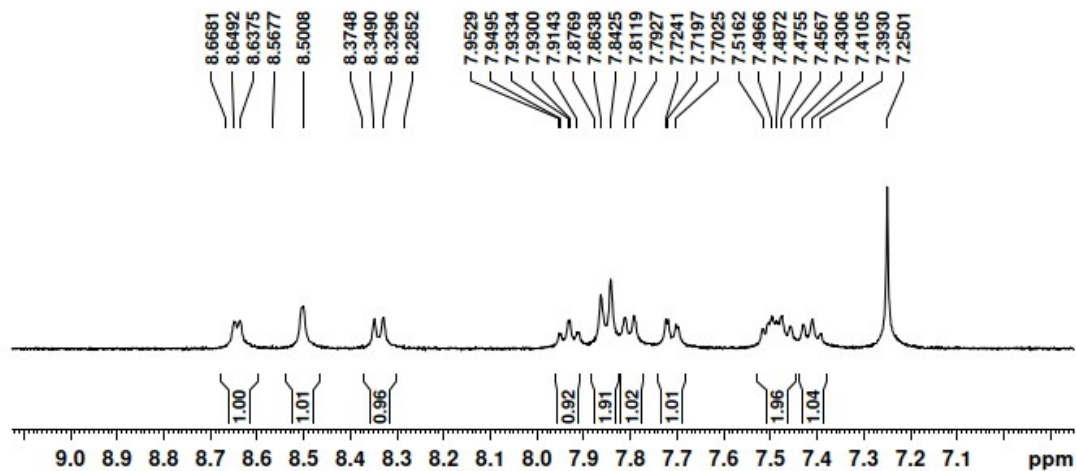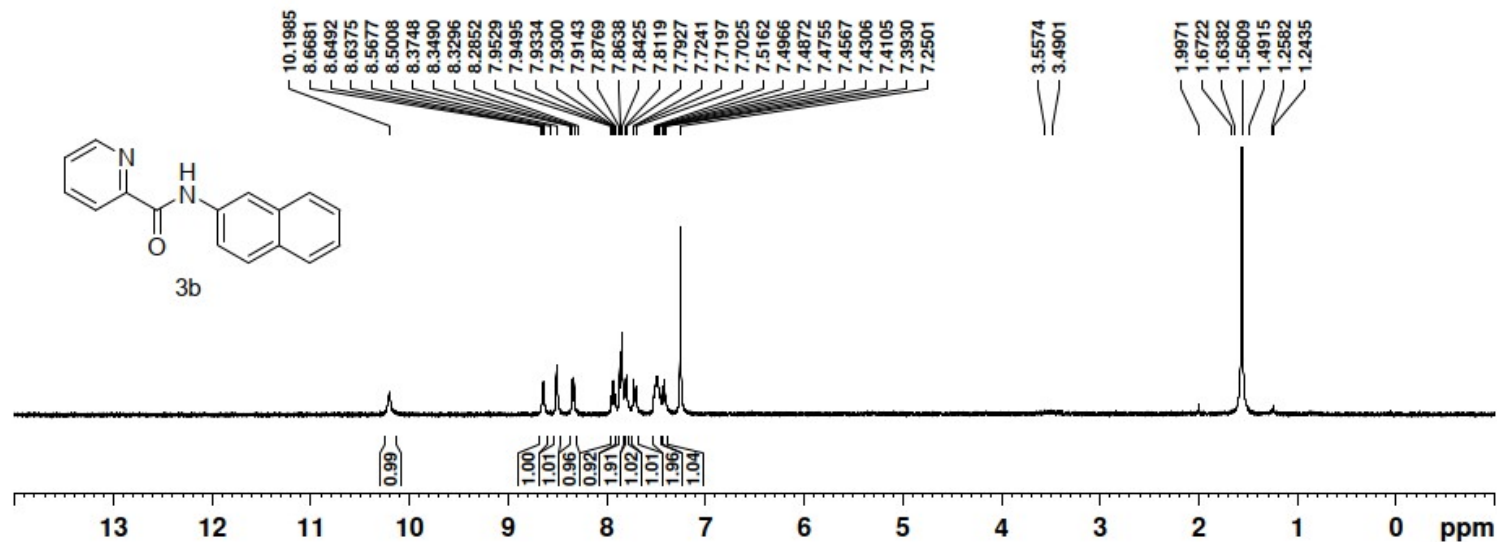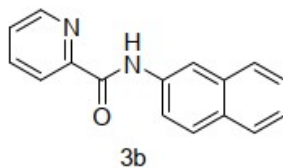

3b IN CDCl3-13C

```

NAME 3b
EXPNO 60
PROCNO 1
Date_ 20111218
Time 12.14
INSTRUM spect
PROBHD 5mm PABBO BB-
PULPROG zgpg30
TD 65536
SOLVENT CDCl3
NS 500
DS 4
SWH 25323.528 Hz
FIDRES 0.285323 Hz
AQ 1.271629 sec
RG 2050
DW 19.800 usec
DE 6.50 usec
TE 303.2 K
D1 2.50000000 sec
D11 0.33000000 sec
TD0 1
===== CHANNEL f1 =====
NUC1 13C
P1 6.75 usec
PL1 0.00 dB
SFO1 100.6261201 MHz
===== CHANNEL f2 =====
CPDPRG2 waltz16
NUC2 1H
PCPD2 80.00 usec
PL2 0.00 dB
PL12 12.40 dB
PL13 17.00 dB
SFO2 400.2010000 MHz
SI 32768
SF 100.6261201 MHz
WDW EM
SSB 0
LB 1.00 Hz
GB 0
PC 1.40
    
```

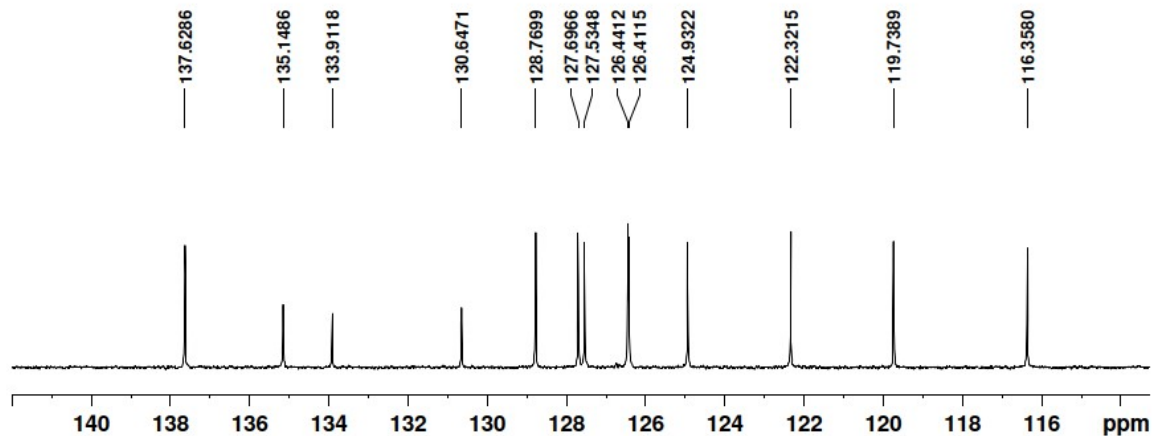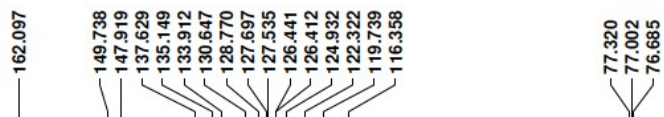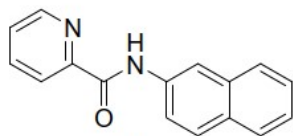

3b

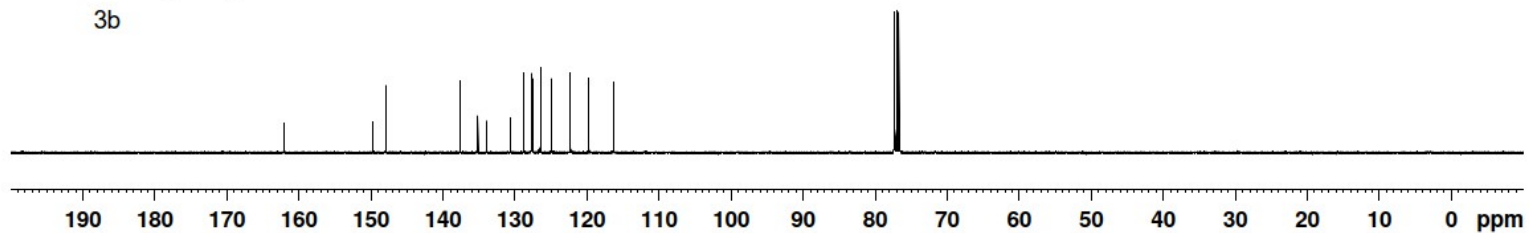

3b IN CDCl3-APT

```

NAME 3b 61
EXPNO 1
PROCNO 1
Date_ 20211218
Time 14.31
INSTRUM spect
PROBHD 5 mm PABBO BB-
PULPROG gpcpg
TD 65536
SOLVENT CDCl3
DS 4
SC 249
SWH 24028.461 Hz
FREQS 101.625786 MHz
AQ 1.2621896 sec
RG 2500
DW 20.000 usec
DE 6.50 usec
TE 300.2 K
CHST2 140.000000
CHST11 1.0000000
D1 2.0000000 sec
D2 0.0000000 sec
D3 0.0000000 sec
TD0

===== CHANNEL f1 =====
NUC1 13C
P1 6.75 usec
P2 13.50 usec
PL1 0.00 dB
SFO1 100.626125 MHz

===== CHANNEL f2 =====
CPDPRG2 waltz16
NUC2 1H
PCPD2 40.00 usec
PL2 0.00 dB
PL12 12.40 dB
SFO2 400.2019200 MHz
SF 100.626125 MHz
SF 400.2019200 MHz
WOW 0.00 Hz
SSB 0
LS 1.00 Hz
GB 0
PC 1.40
    
```

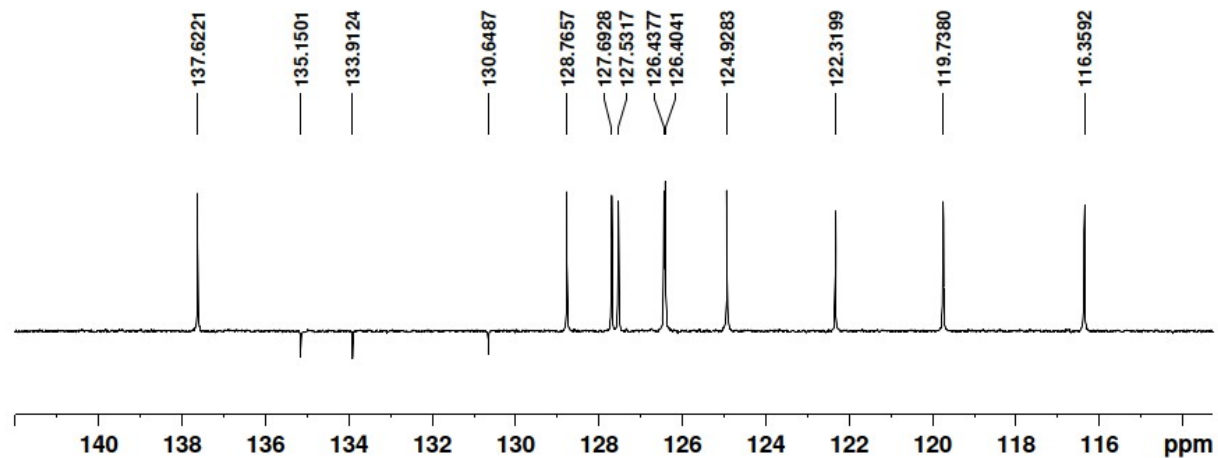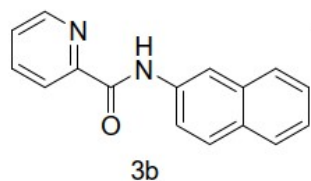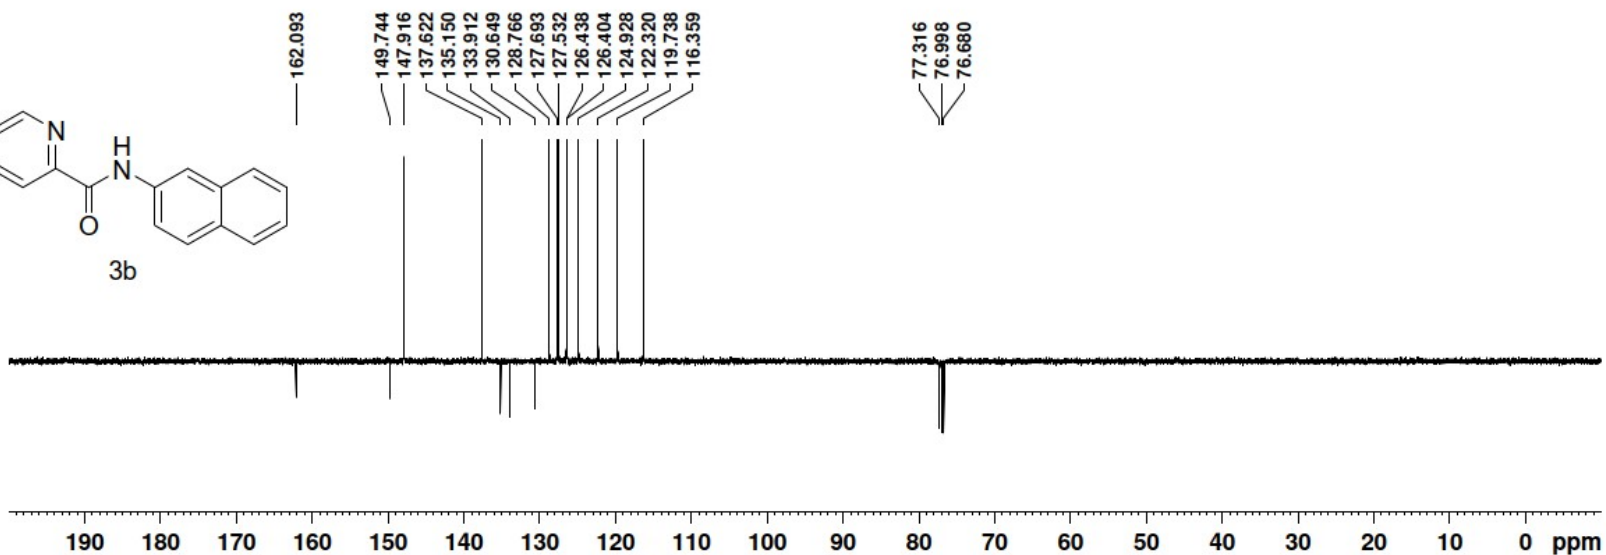

3c IN CDCl3

NAME 3c  
EXPNO 10  
PROCNO 1  
Date\_ 20211211  
Time 12.21  
INSTRUM spect  
PROBHD 5 mm PABBO BB-  
PULPROG zg30  
TD 24576  
SOLVENT CDCl3  
NS 8  
DS 0  
SWH 8012.820 Hz  
FIDRES 0.326043 Hz  
AQ 1.5339923 sec  
RG 256  
DW 62.400 usec  
DE 6.50 usec  
TE 673.2 K  
D1 1.00000000 sec  
TDO 1  
===== CHANNEL f1 =====  
NUC1 1H  
P1 17.00 usec  
PL1 0.00 dB  
SFO1 400.2024714 MHz  
SI 16384  
SF 400.2000182 MHz  
WDW EM  
SSB 0  
LB 0.30 Hz  
GB 0  
PC 1.00

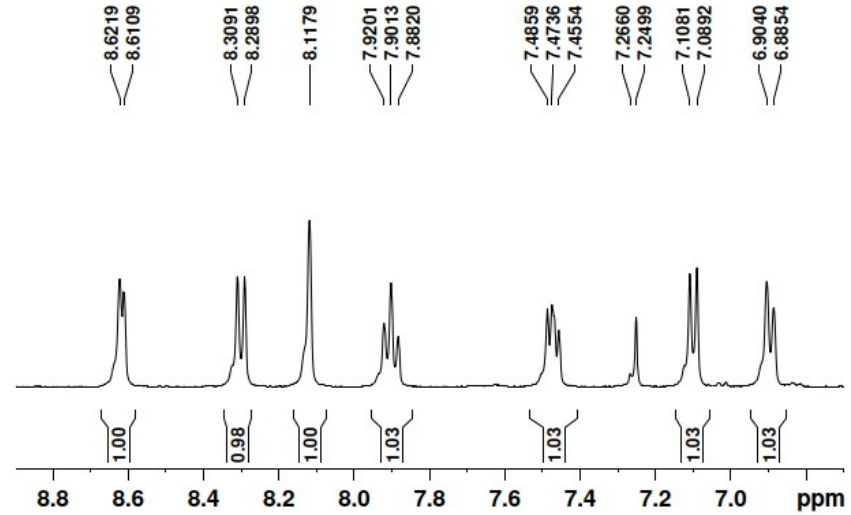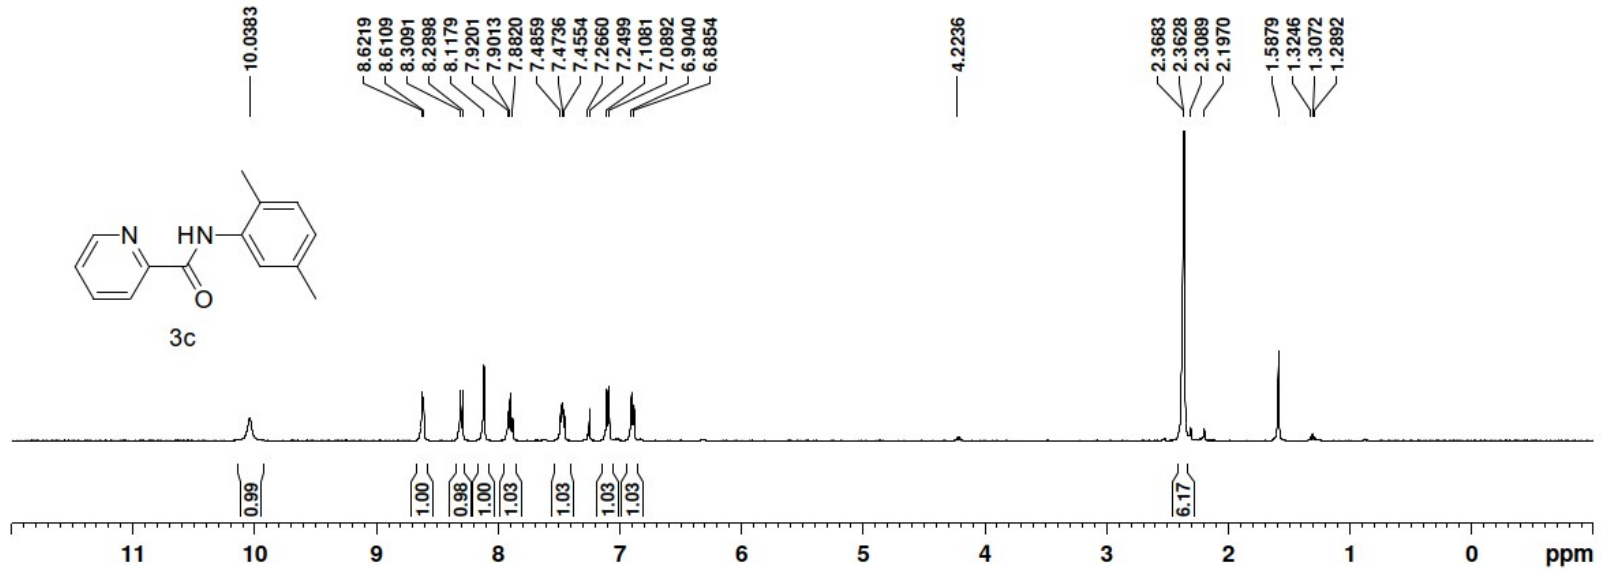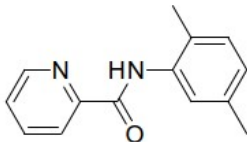

3c



3c IN CDCl3-13C

```

NAME 3c
EXPNO 80
PROCNO 1
Date_ 20211211
Time 12:28
INSTRUM spect
PROBHD 5 mm PABBO BB-
PULPROG zgpg30
TD 65536
SOLVENT CDCl3
NS 80
DS 4
SWH 2822.523 Hz
F2RES 0.28323 Hz
AQ 1.297629 sec
RG 2000
DW 19.800 usec
DE 8.50 usec
TE 273.2 K
D1 2.00000000 sec
D11 0.20000000 sec
TD0 1

===== CHANNEL f1 =====
NUC1 13C
P1 6.78 usec
PL1 0.00 dB
SFO1 100.626131 MHz

===== CHANNEL f2 =====
CPOPRG2 waltz16
NUC2 1H
PCPD2 80.00 usec
PL2 0.00 dB
PL12 13.45 dB
PL13 17.00 dB
SFO2 400.2016008 MHz
SI 32768
SF 100.6261308 MHz
WDW EM
SSB 0
LB 1.00 Hz
GB 0
PC 1.40
    
```

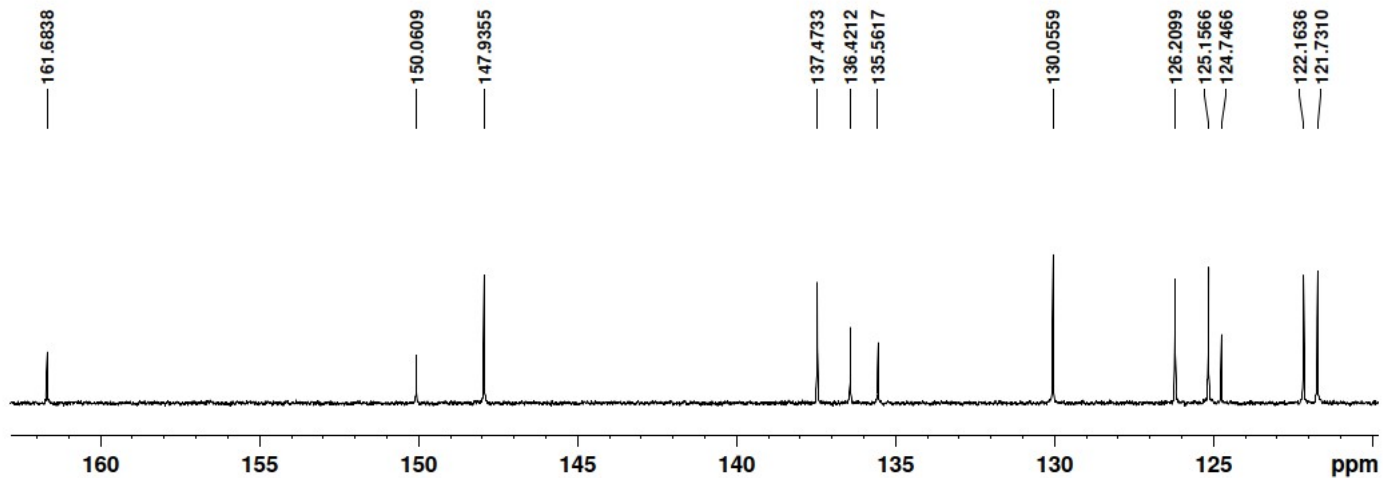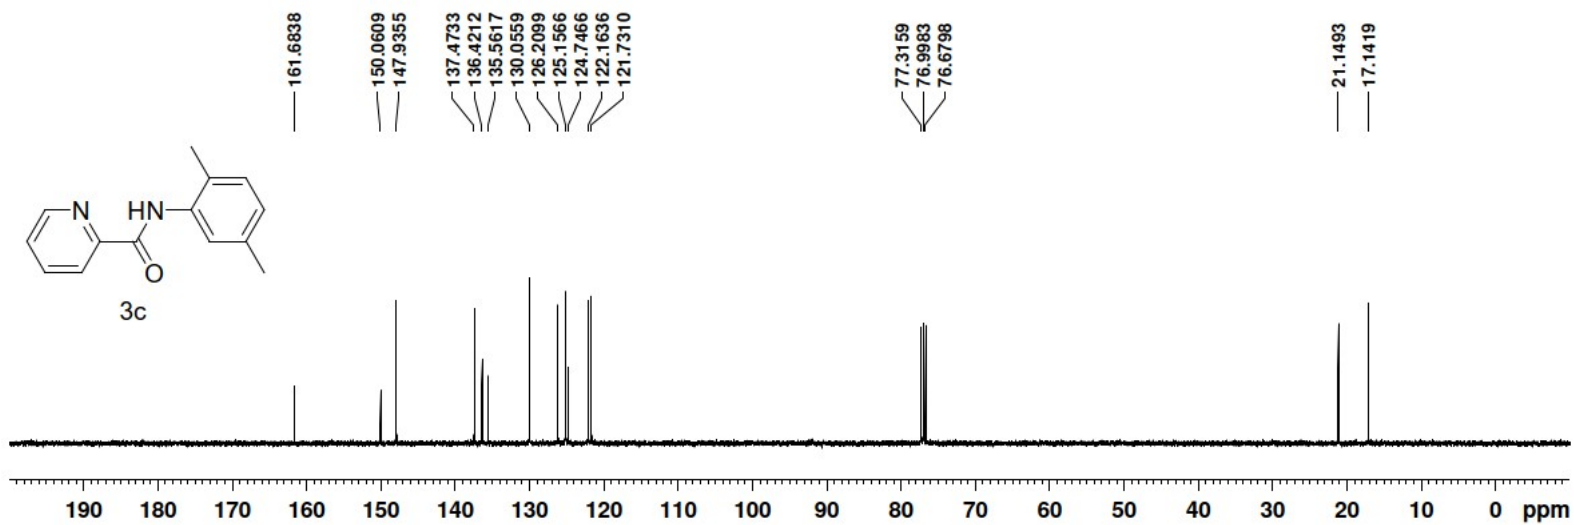

```

NAME 3c
EXPNO 51
PROCNO 1
Date_ 201211
Time 12.30
INSTRUM spect
PROBHD 5 mm PABBO BB-
PULPROG zgpg30
TD 65536
FID SOLVENT f2
SI 2
SF 282.401 MHz
AQ 0.388798 Hz
RG 1.263788 sec
RG 250
DE 6.50 umec
TE 297.2 K
CNS1 140.000000
CNS2 1.000000
CT 2.0000000 sec
DD 0.0000000 sec
TD 1
===== CHANNEL f1 =====
NUC1 13C
P1 6.70 umec
P2 13.50 umec
PL1 0.00 dB
SFO1 100.6261251 MHz
===== CHANNEL f2 =====
CPDPRG2 waltz16
NUC2 13C
PCPD2 80.00 umec
PL2 0.00 dB
PL3 13.50 dB
SFO2 400.2615003 MHz
SI 32768
SF 100.6261251 MHz
WDW EM
SSB 0
LB 1.00 Hz
GB 0
PC 1.40

```

3c IN CDCl<sub>3</sub>-APT

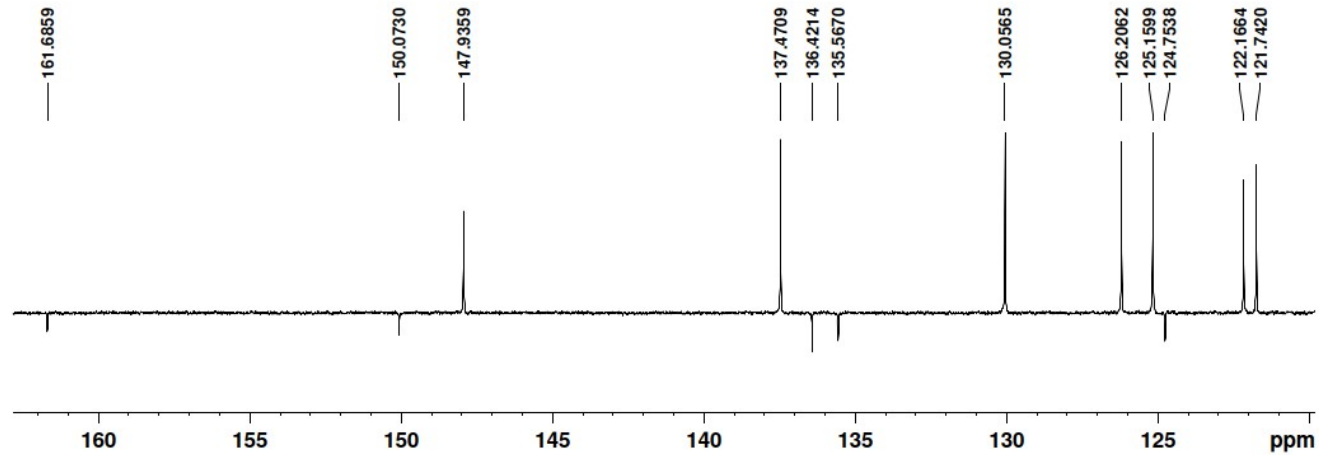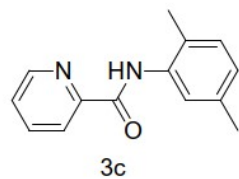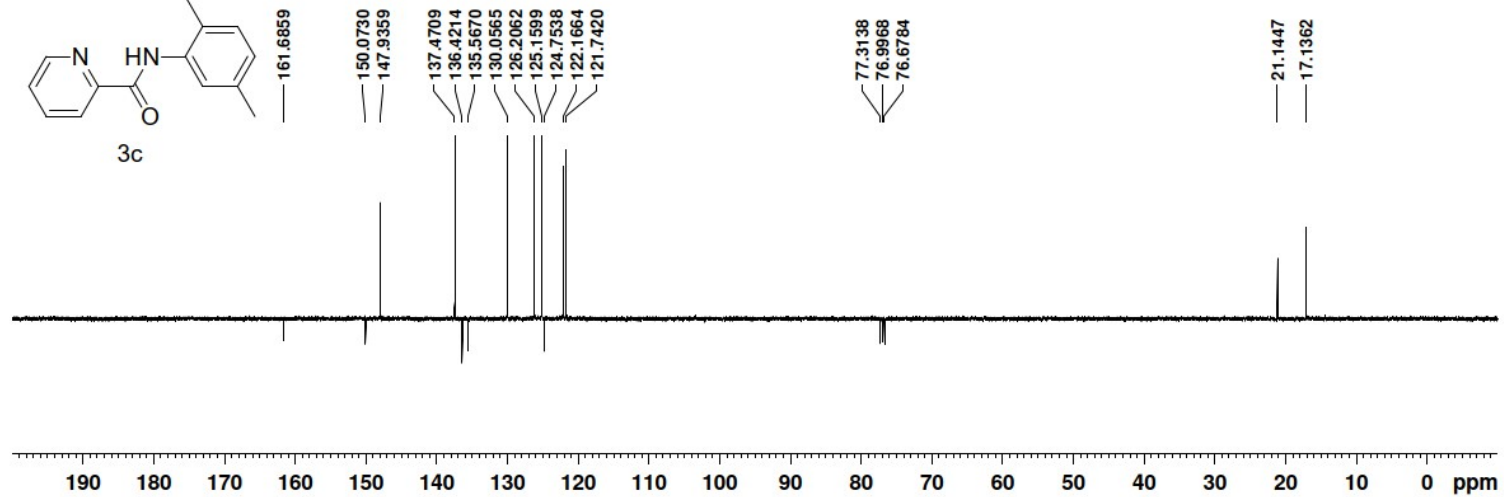

4a-Ir IN CDCl3

```

Current Data Parameters
NAME      4a-Ir
EXPNO    10
PROCNO   1
F2 - Acquisition Parameters
Date_    20220518
Time     0.09 h
INSTRUM  spect
PROCNO   28246_0048
PULPROG  zg30
TD       24036
SOLVENT  CDCl3
NS       8
DS       0
SWH      8012.820 Hz
FIDRES   0.666735 Hz
AQ       1.4998465 sec
RG       128
DM       62.400 usec
DE       6.50 usec
TE       300.2 K
D1       1.00000000 sec
TDC      400.1024004 MHz
SFO1     400.139 MHz
NUC1     1H
PC       18.00 usec
PL1      10.00000000 W
F2 - Processing parameters
SI       16384
SF       400.1000139 MHz
WDW      EM
SSB      0
LB       0 Hz
GB       0
PC       1.00
    
```

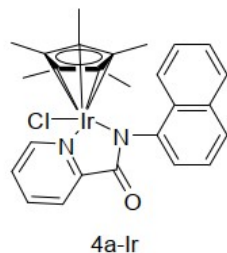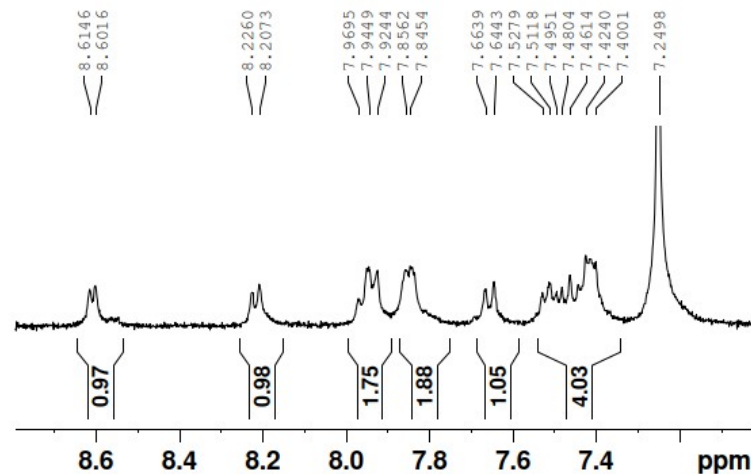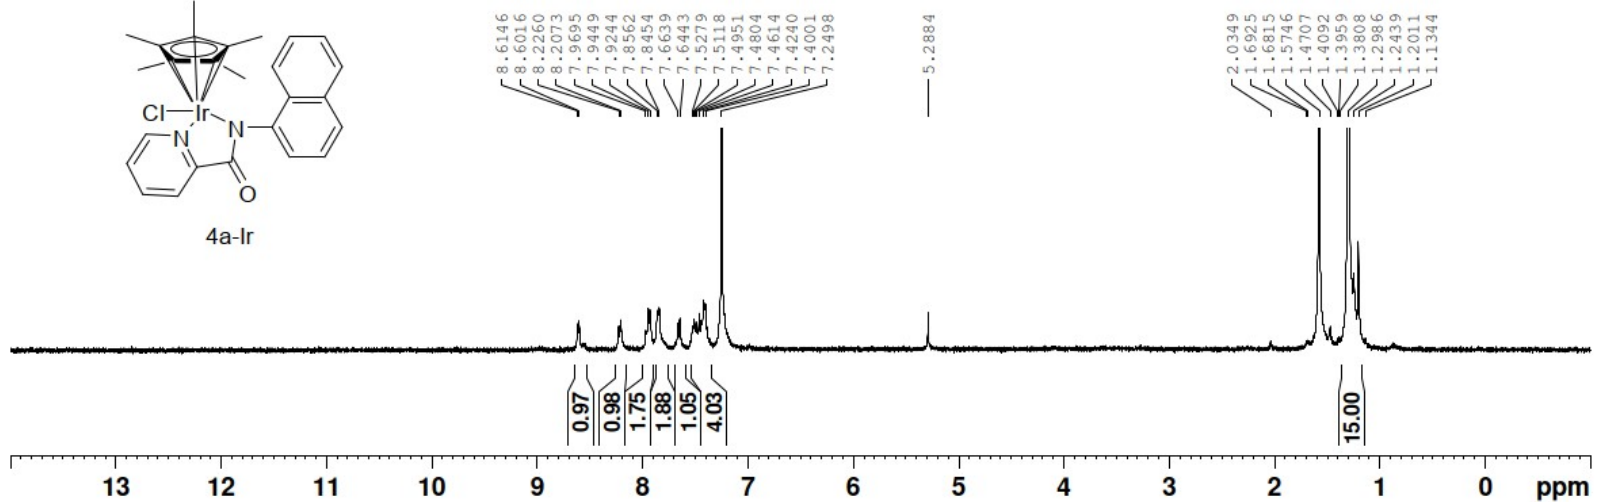

4a-Ir IN CDCl<sub>3</sub>-13C

Current Data Parameters  
 NAME 4a-Ir  
 EXPNO 60  
 PROCNO 1

F2 - Acquisition Parameters  
 Date\_ 20211127  
 Time 17.13 h  
 INSTRUM spect  
 PROBHD Z163739\_0162 (Zpgg30)  
 PULPROG zpgg30  
 TD 32768  
 SOLVENT CDCl<sub>3</sub>  
 NS 424  
 DS 4  
 SWH 25252.525 Hz  
 FIDRES 1.541292 Hz  
 AQ 0.6488564 sec  
 RG 208.6  
 DW 19.800 usec  
 DE 6.50 usec  
 TE 297.1 K  
 D1 2.00000000 sec  
 D11 0.03000000 sec  
 TD0 1  
 SFO1 100.6328888 MHz  
 NUC1 13C  
 P0 2.67 usec  
 P1 8.00 usec

F2 - Processing parameters  
 SI 16384  
 SF 100.6228359 MHz  
 WDW EM  
 SSB 0  
 LB 1.00 Hz  
 GB 0  
 PC 1.40

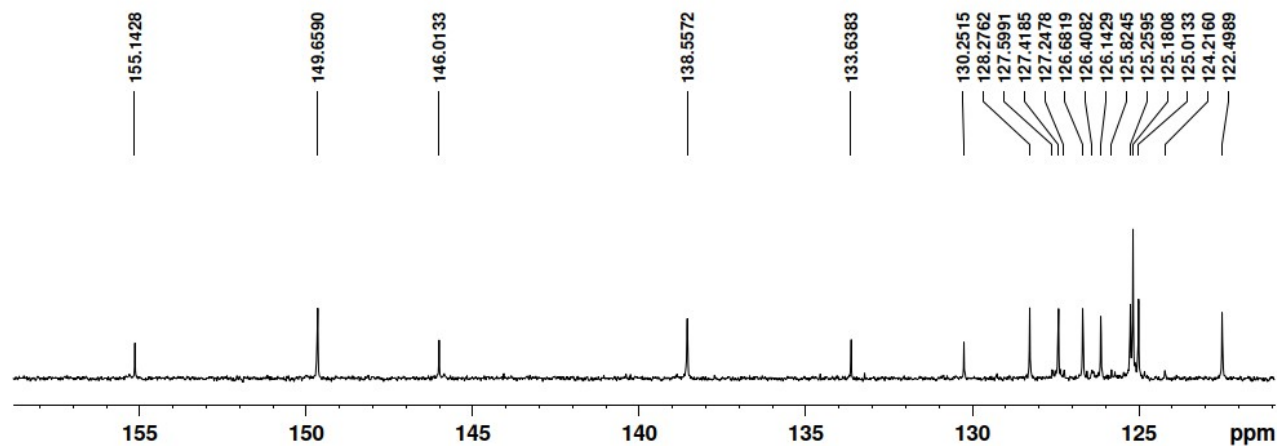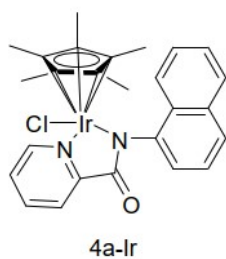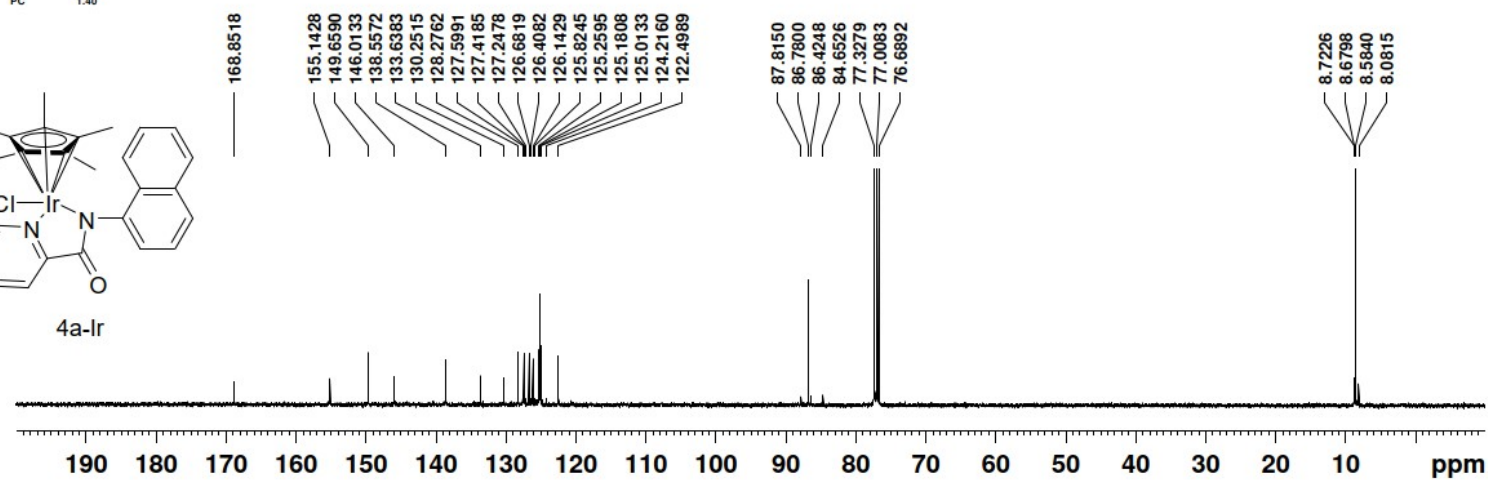

4a-Ir IN CDCl3-APT

Current Data Parameters  
 NAME 4a-Ir  
 EXPNO 61  
 PROCNO 1

F2 - Acquisition Parameters  
 Date\_ 20211127  
 Time 17.25 h  
 INSTRUM spect  
 PROBHD Z163739\_0162 ( )  
 PULPROG mod  
 TD 32768  
 SOLVENT CDCl3  
 NS 251  
 DS 4  
 SWH 25252.625 Hz  
 FIDRES 1.541292 Hz  
 AQ 0.6488954 sec  
 RG 206.6  
 DW 19.800 usec  
 DE 6.50 usec  
 TE 297.5 K  
 CNST2 145.0000000  
 CNST11 1.0000000  
 D1 2.0000000 sec  
 D20 0.00689655 sec  
 TSD 1  
 SFO1 100.6328888 MHz  
 NUC1 13C  
 P1 8.00 usec  
 P2 16.00 usec

F2 - Processing parameters  
 SI 16384  
 SF 100.6228359 MHz  
 WDW EM  
 SSB 0  
 LB 1.00 Hz  
 GB 0  
 PC 1.40

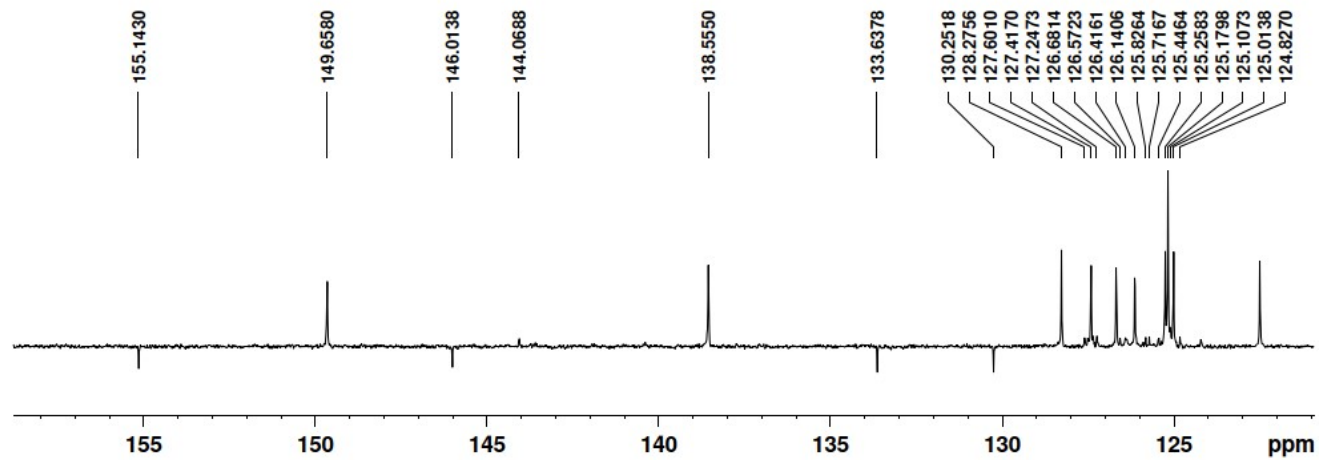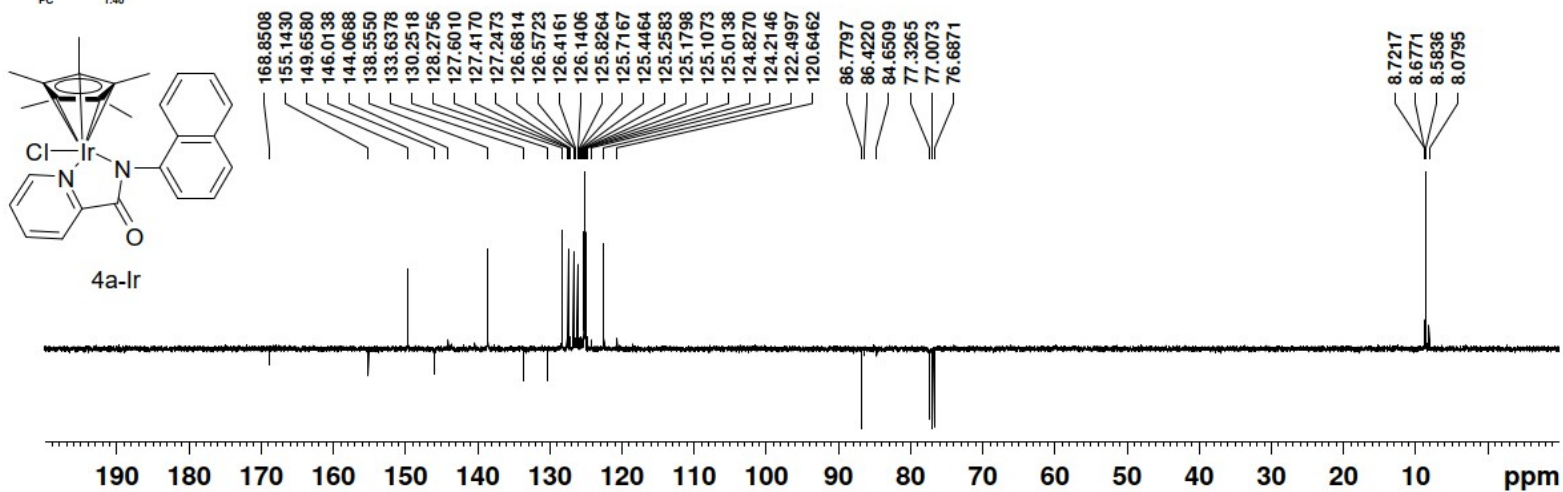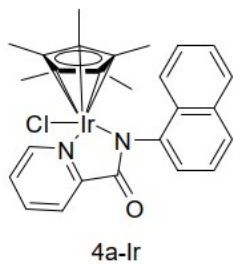

4b-Ir IN CDCl3

NAME 4b-Ir  
 EXPNO 10  
 PROCNO 1  
 Date\_ 20211127  
 Time 16.24 h  
 INSTRUM spect  
 PROGHD Z163739\_0162 ( )  
 PULPROG zg30  
 TD 24036  
 SOLVENT CDCl3  
 NS 32  
 DS 0  
 SWH 12019.230 Hz  
 FIDRES 1.000102 Hz  
 AQ 0.9999476 sec  
 RG 208.5  
 DW 41.600 usec  
 DE 11.61 usec  
 TE 296.7 K  
 D1 1.00000000 sec  
 SFO1 400.1724710 MHz  
 NUC1 1H  
 P0 2.67 usec  
 P1 8.00 usec  
 SI 16384  
 SF 400.1706034 MHz  
 WDW EM  
 SSB 0  
 LB 0.30 Hz  
 GB 0  
 PC 1.00

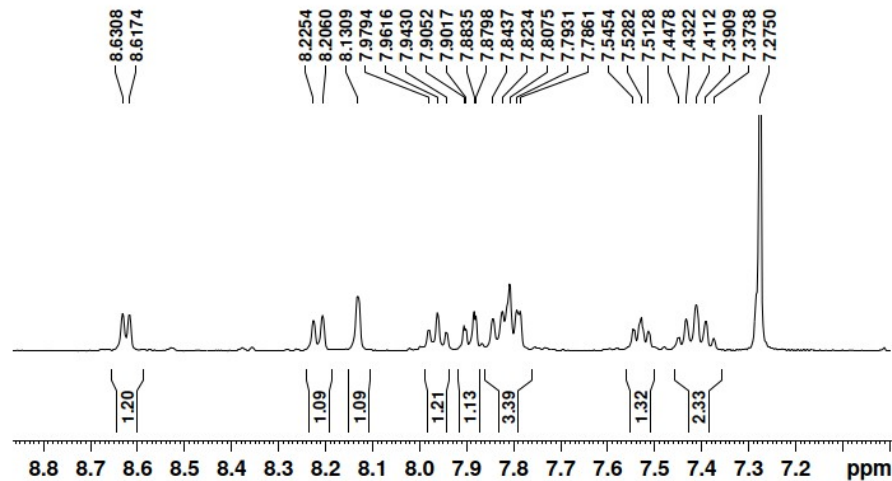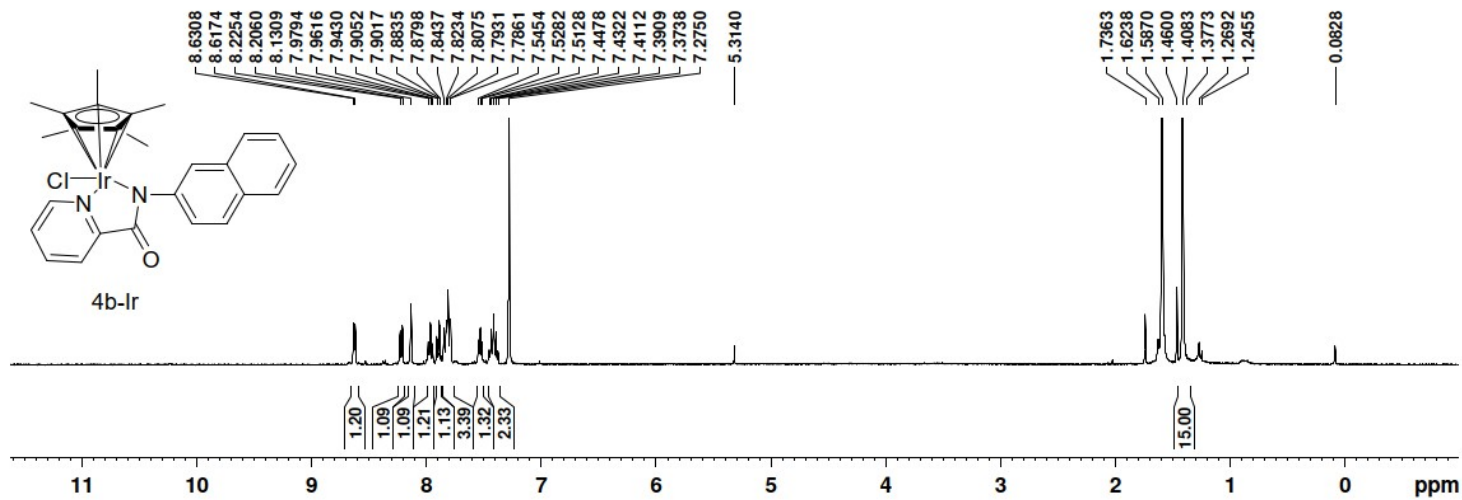

4b-Ir IN CDCl3-13C

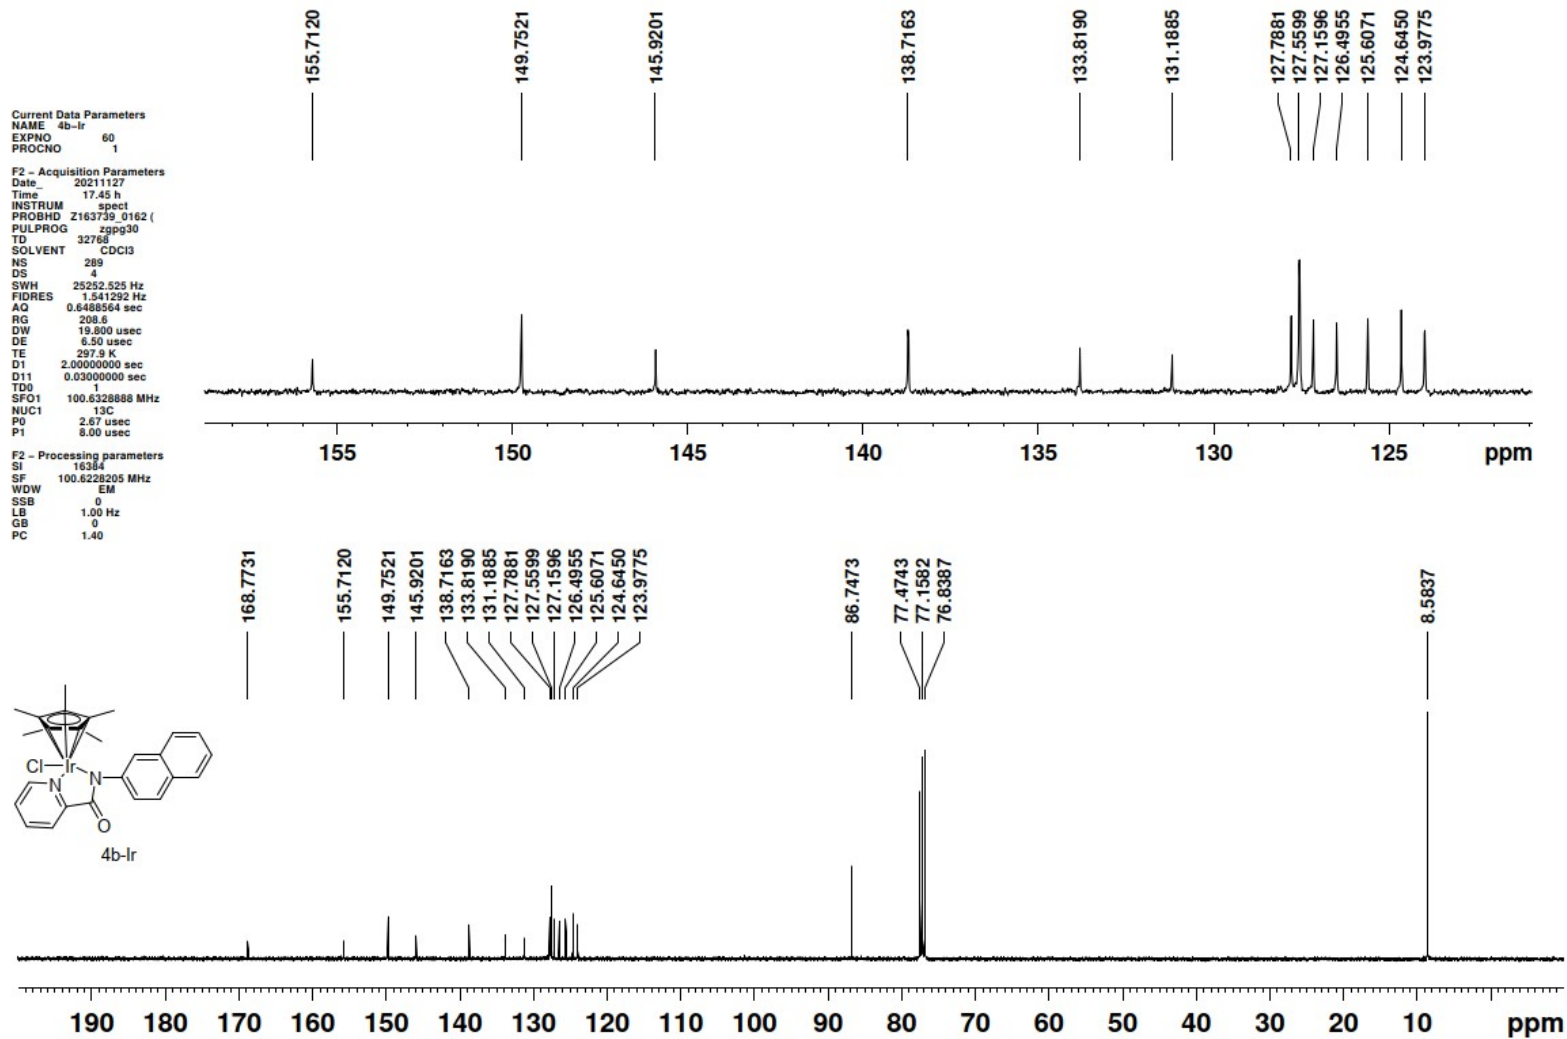

4b-Ir IN CDCI3-APT

Current Data Parameters  
 NAME 4b-Ir  
 EXPNO 61  
 PROCNO 1

F2 - Acquisition Parameters  
 Date\_ 20211127  
 Time 17:58 h  
 INSTRUM spect  
 PROBHD Z163739\_0162 ( )  
 PULPROG jmod  
 TD 32768  
 SOLVENT CDCl3  
 NS 256  
 DS 4  
 SWH 25252.525 Hz  
 FIDRES 1.241292 Hz  
 AQ 0.6489564 sec  
 RG 206.6  
 DW 19.800 usec  
 DE 6.50 usec  
 TE 298.3 K  
 CNST2 145.0000000  
 CNST11 1.0000000  
 D1 2.00000000 sec  
 D20 0.00689655 sec  
 TD0  
 SFO1 100.628888 MHz  
 NUC1 13C  
 P1 8.00 usec  
 P2 16.00 usec

F2 - Processing parameters  
 SI 16384  
 SF 100.628359 MHz  
 WDW EM  
 SSB 0  
 LB 1.00 Hz  
 GB 0  
 PC 1.40

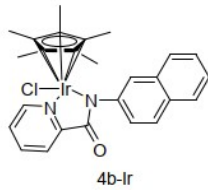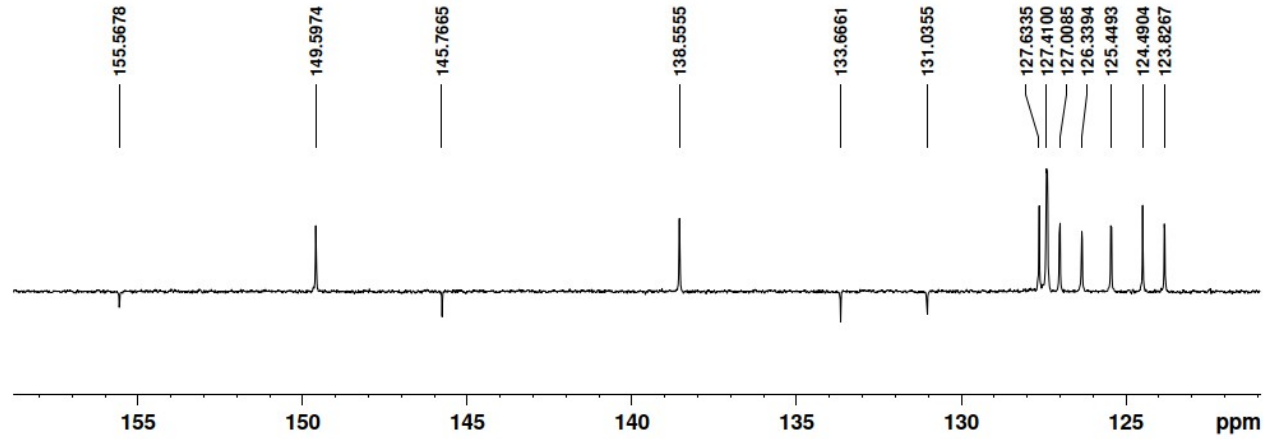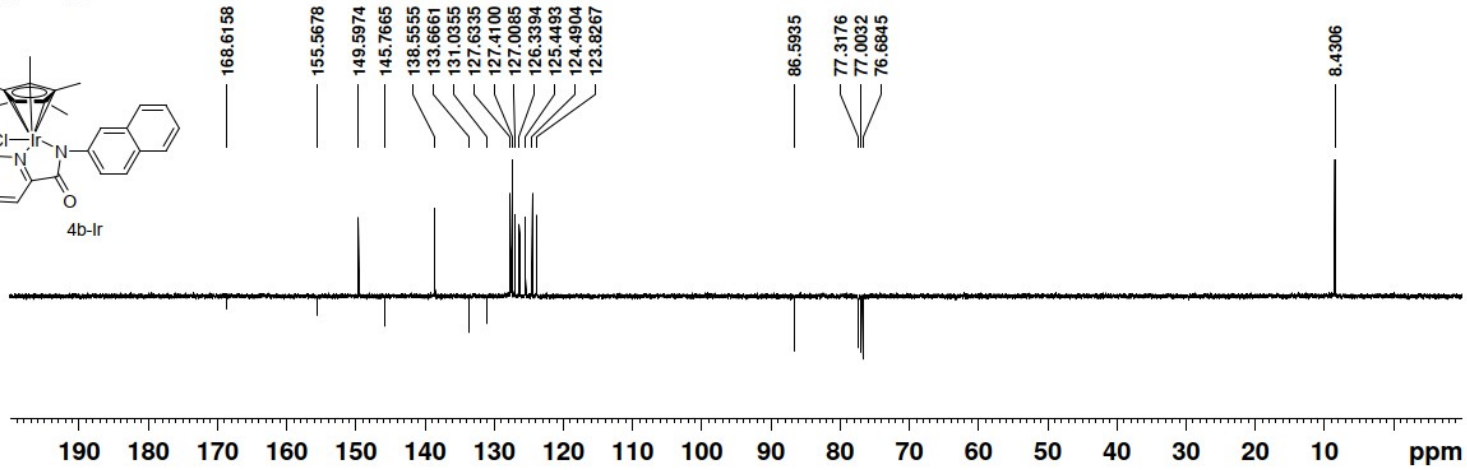



4c-Ir IN CDC13

```

Current Data Parameters
NAME 4c-Ir
EXPNO 10
PROCNO 1

F2 - Acquisition Parameters
Date_ 20240222
Time 1:00 h
INSTRUM spect
PROBHD ZB246.0048 (P)
PULPROG zg30
TD 24500
SOLVENT CDC13
NS 8
DS 0
SWH 12019.230 Hz
FIDRES 1.001603 Hz
AQ 0.2984000 sec
RG 16
SW 41.600 usac
DE 6.50 usac
TE 300.0 K
D1 0 sec
TDO 0
SFO1 400.1024006 MHz
NUC1 191
P2 6.00 usac
P1 18.00 usac
PL1 10.00000000 W

F2 - Processing parameters
SI 16384
SF 400.1000138 MHz
WDW EM
SSB 0
LB 0 Hz
GB 0
PC 1.00
    
```

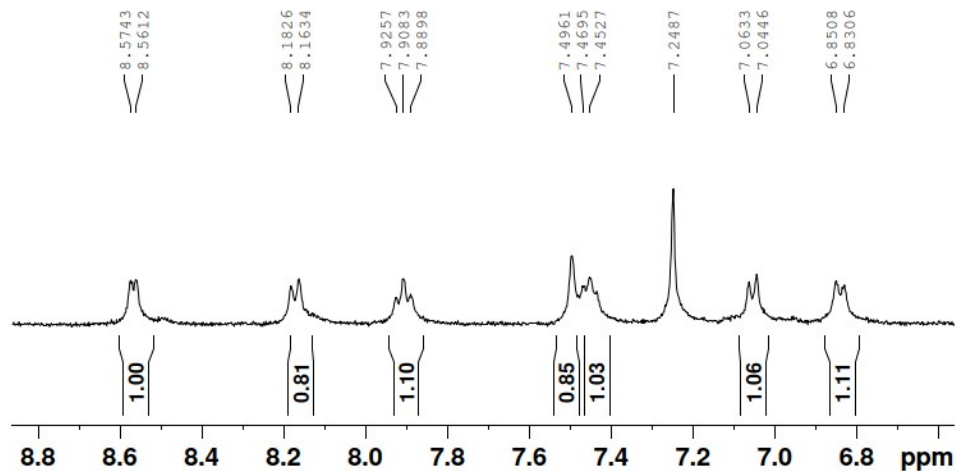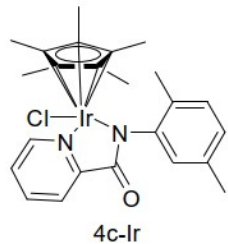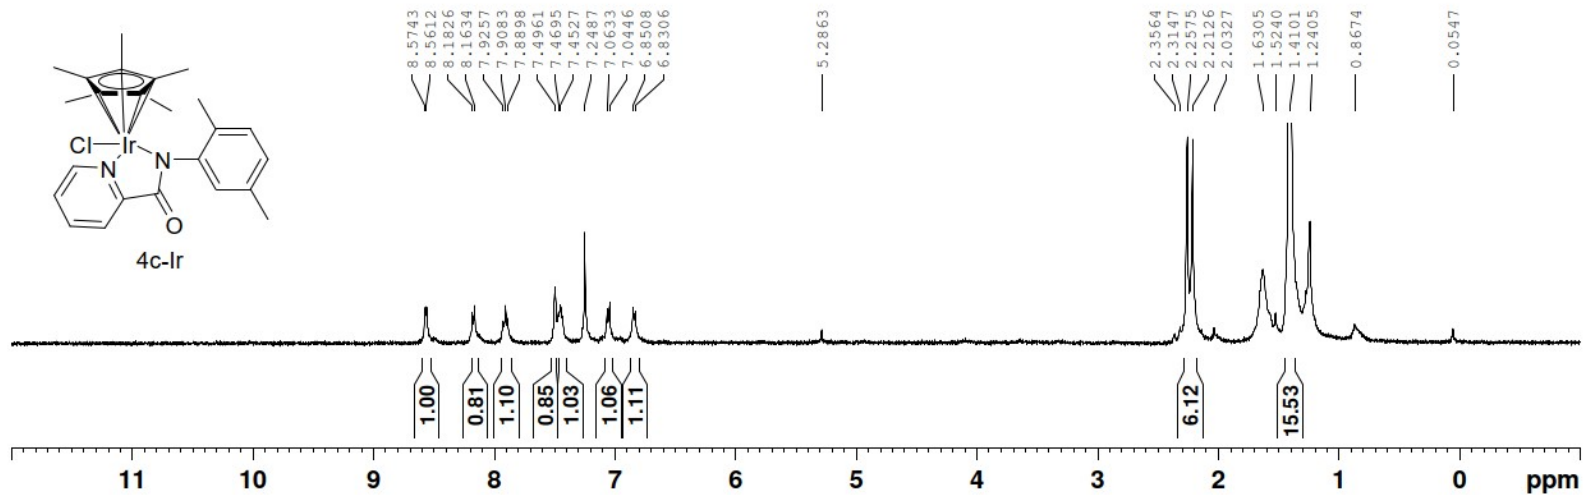

4c-Ir IN CDCl3-13C

```

Current Data Parameters
NAME      4c-Ir
EXPNO    1
PROCNO   1

F2 - Acquisition Parameters
Date_    20220211
Time     9.10 h
INSTRUM  spect
PROBHD   E143739_5142 (
PULPROG  zgpg30
SD       32748
SOLVENT  CDCl3
NS       500
DS       4
SWH       25282.522 Hz
FIDRES   0.1461295 Hz
AQ       0.6488064 sec
RG       256
SM       19.800 usec
SE       6.00 usec
SF       298.2 K
SI       2.00000000 sec
SLL      0.03000000 sec
TD       100.6328898 Mux
MPC1     126
PC       2.07 usec
SI       8.00 usec
FIR1     80.42400360 M
SFO1     400.1714007 Mux
MPC2     18
CQPC0012 waltz16
PCPD2    30.00 usec
PCPD3    21.7939977 M
PCPD4    0.17188001 M
PCPD5    0.08461400 M

F2 - Processing parameters
SI       4398
SF       100.6228387 Mux
WDW       EM
SSB       0
LB       1.00 Hz
GB       0
PC       1.40
    
```

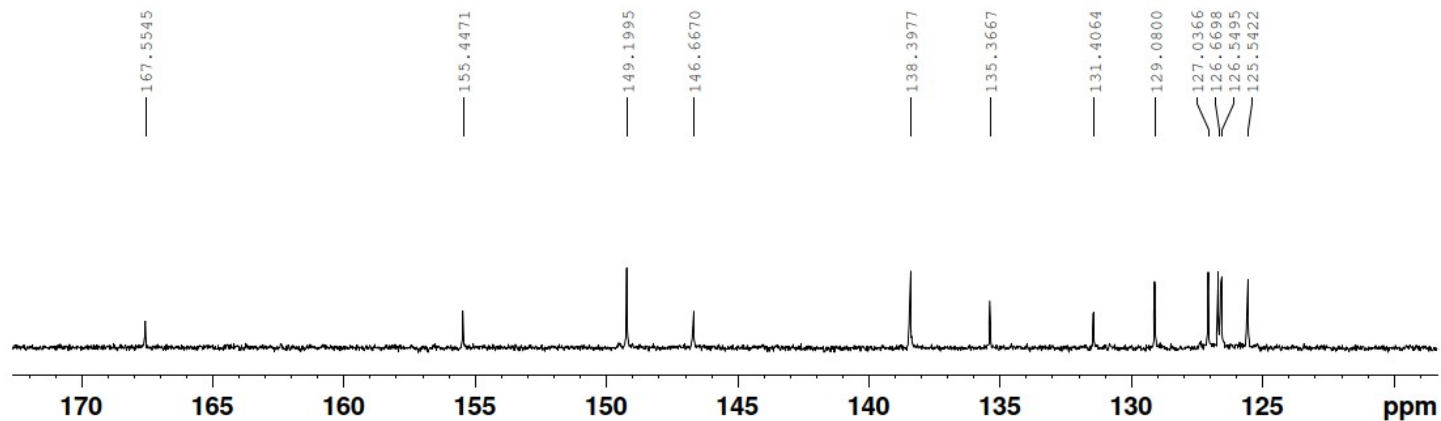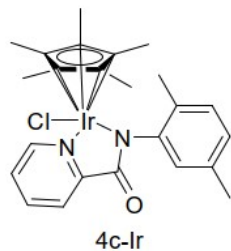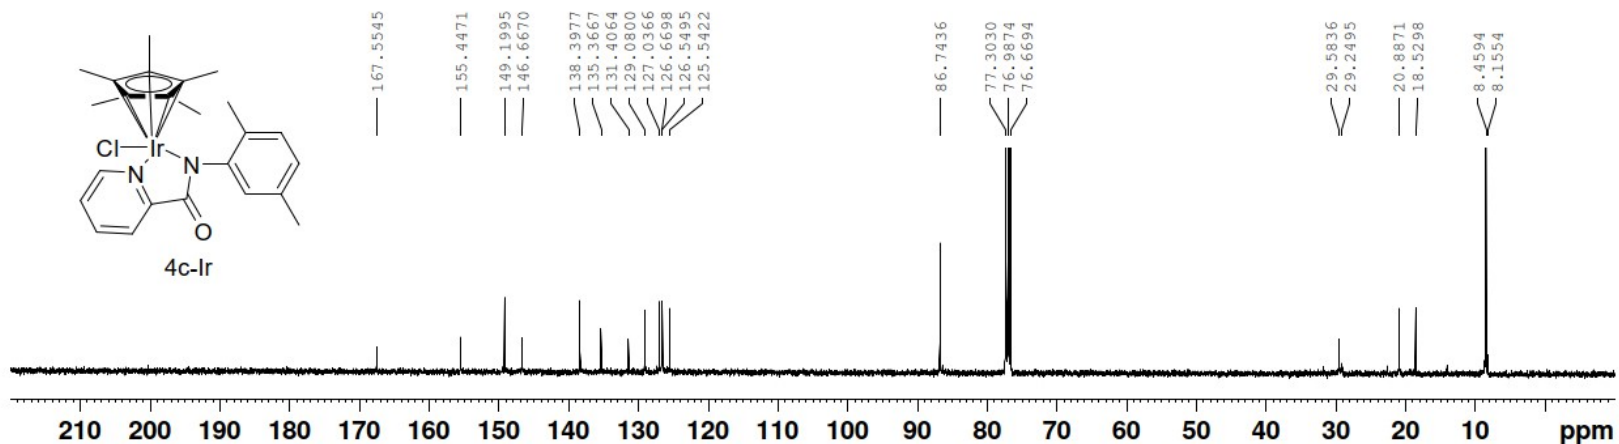

4c-Ir IN CDCl3-APT

Current Data Parameters  
NAME 4c-Ir  
SOPNO 41  
PROCNO 1  
F2 - Acquisition Parameters  
Date 202511  
Time 9:28 h  
INSTRUM spect  
PROCNO 1147739\_5142\_1  
SOLVENT DMSO  
TD 32768  
SOLVENT CHCl3  
SI 402  
RG 402  
SHE 2000.00 Hz  
FIDRES 1.561292 Hz  
AQ 0.448004 sec  
RG 208.8  
SW 19.905 usmc  
SE 6.55 usmc  
TE 299.2 K  
CNP22 145.000000  
CNP11 1.000000  
SI 2.0000000 sec  
SFO 0.0048002 sec  
YD 100.432400 MHz  
SFO2 130  
SI 8.00 usmc  
SFO 80.4240300 MHz  
SFO2 400.1714007 MHz  
SFO3 145  
CPDPRG2 waltz16  
SFO3 90.00 usmc  
SFO4 21.78398971 MHz  
SFO5 0.17140001 MHz  
F2 - Processing parameters  
SI 145.000000  
SF 100.6263504 MHz  
WDW EM  
SSB 0  
LB 1.00 Hz  
GB 0  
PC 1.40

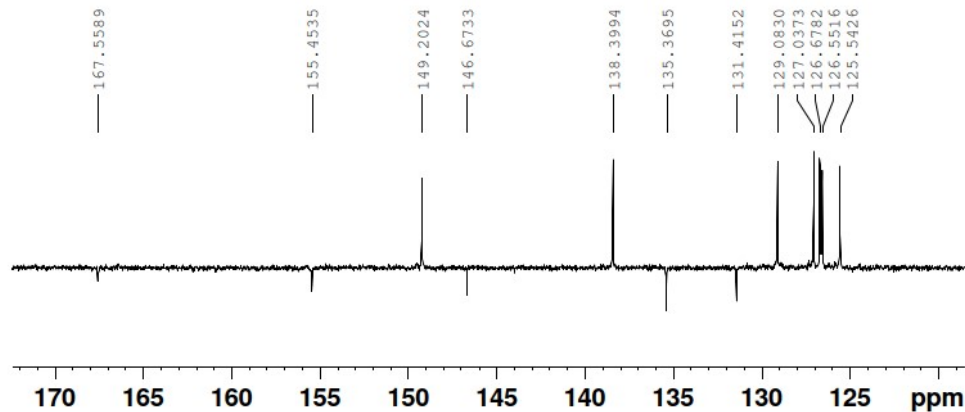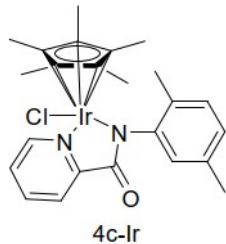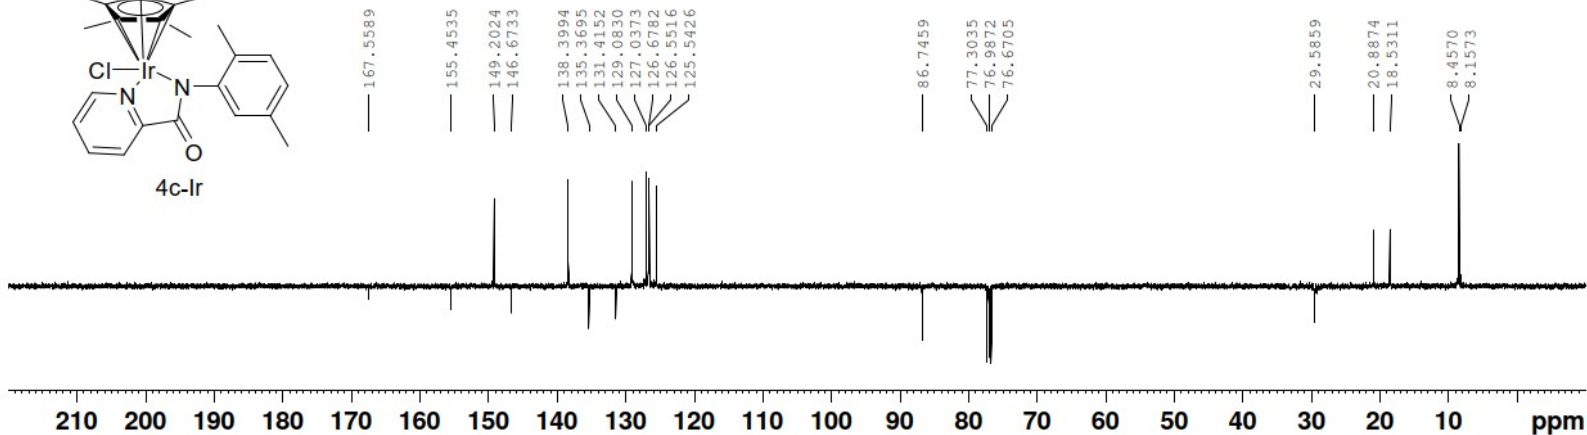

7a IN CDCl3

Current Data Parameters

NAME 7a  
 EXPNO 10  
 PROCNO 1  
 Date\_ 20211203  
 Time 18.00  
 INSTRUM spect  
 PROBHD 5 mm PABBO BB-  
 PULPROG zg30  
 TD 24576  
 SOLVENT CDCl3  
 NS 8  
 DS 0  
 SWH 8012.820 Hz  
 FIDRES 0.320040 Hz  
 AQ 1.5335923 sec  
 RG 512  
 DW 62.400 usec  
 DE 6.50 usec  
 TE 293.2 K  
 D1 1.00000000 sec  
 TDO 1

===== CHANNEL f1 =====  
 NUC1 1H  
 P1 17.00 usec  
 PL1 0.00 dB  
 SFO1 400.2024714 MHz  
 SI 16384  
 SF 400.200182 MHz  
 WDW EM  
 SSB 0  
 LB 0.30 Hz  
 GB 0  
 PC 1.00

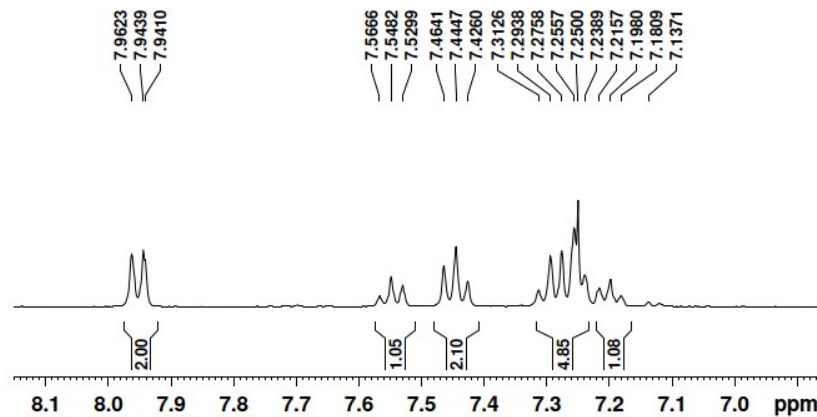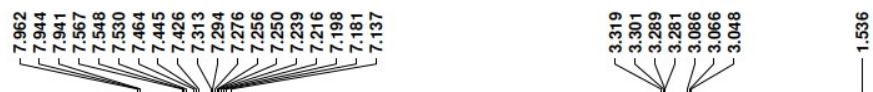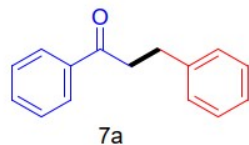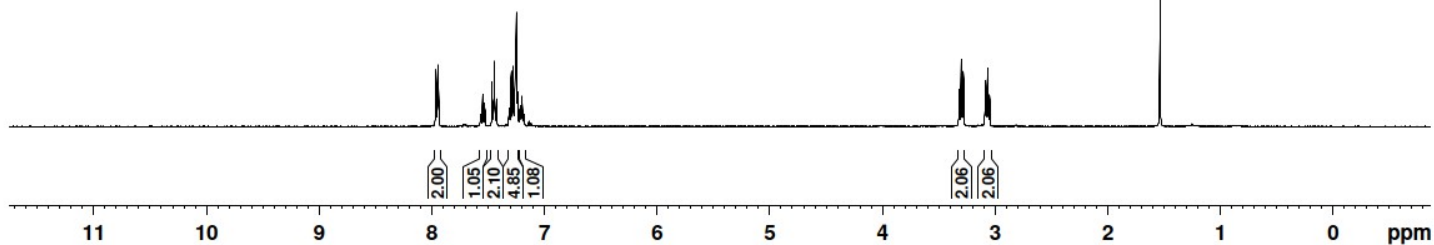

7b IN MeOD

Current Data Parameters

NAME 7b  
 EXPNO 10  
 PROCNO 1  
 Date\_ 20220127  
 Time 18.19  
 INSTRUM spect  
 PROBHD 5 mm PABBO BB-  
 PULPROG zg30  
 TD 24576  
 SOLVENT MeOD  
 NS 8  
 DS 8  
 SWH 8012.820 Hz  
 FIDRES 0.326043 Hz  
 AQ 1.533023 sec  
 RG 512  
 DW 62.400 usec  
 DE 6.50 usec  
 TE 298.2 K  
 DT 0.0000000 sec  
 TDO 1  
 ===== CHANNEL f1 =====  
 NUC1 1H  
 P1 17.00 usec  
 PL1 0.00 dB  
 SFO1 400.2024714 MHz  
 SI 16384  
 SF 400.2009158 MHz  
 WDW EM  
 SSB 0  
 LB 0.30 Hz  
 GB 0  
 PC 1.00

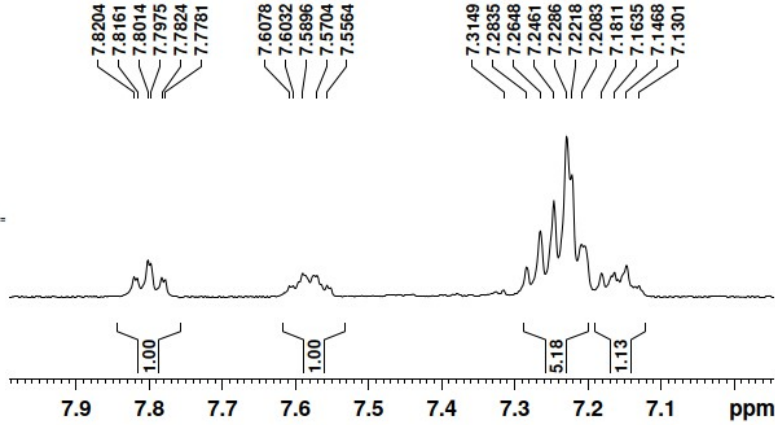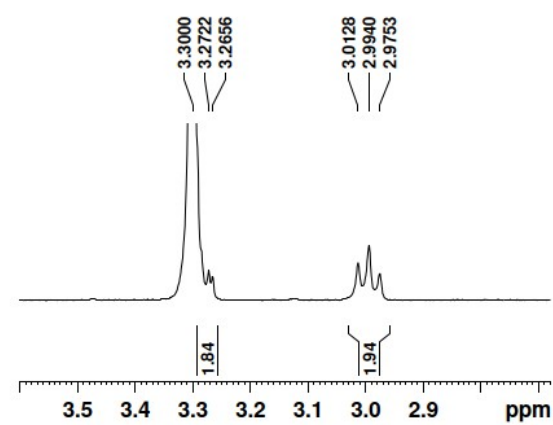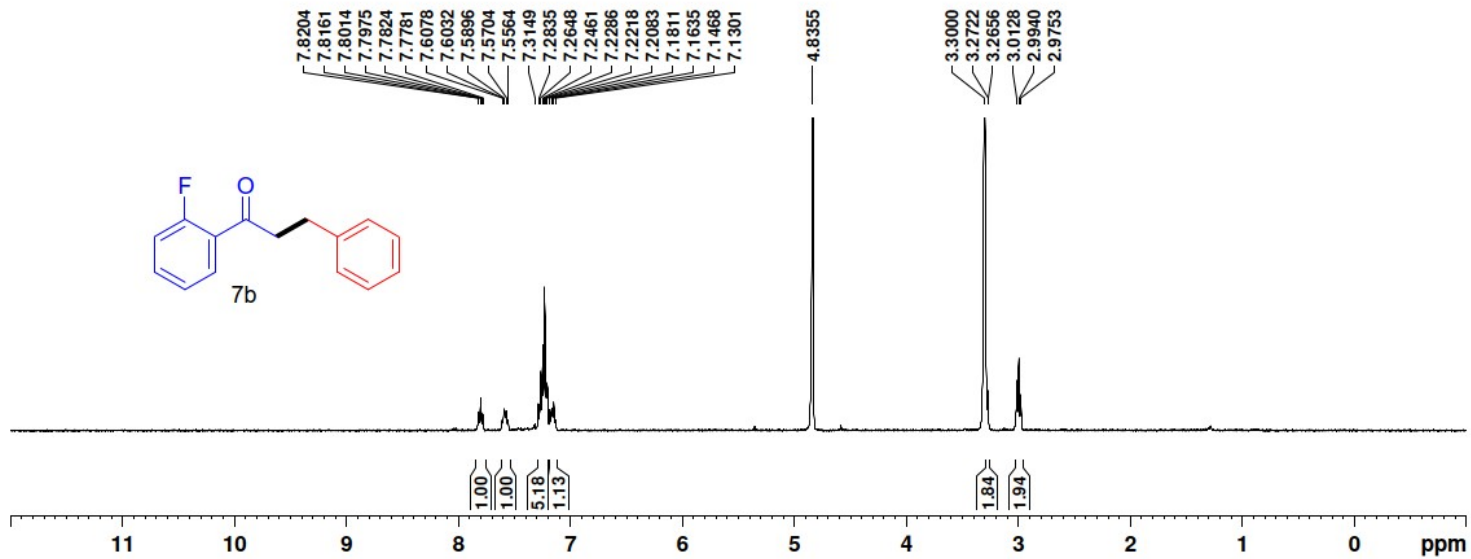

7c IN MeOD

Current Data Parameters

NAME 7c  
 EXPNO 10  
 PROCNO 1  
 Date\_ 20220122  
 Time 13.48  
 INSTRUM spect  
 PROBHD 5 mm PABBO BB-  
 PULPROG zg30  
 TD 24576  
 SOLVENT MeOD  
 NS 8  
 DS 0  
 SWH 8012.820 Hz  
 FIDRES 0.326043 Hz  
 AQ 1.5335923 sec  
 RG 101  
 DW 62.400 usec  
 DE 6.50 usec  
 TE 298.5 K  
 D1 1.0000000 sec  
 TDO 1

===== CHANNEL f1 =====  
 NUC1 1H  
 P1 17.00 usec  
 PL1 0.00 dB  
 SFO1 400.2024714 MHz  
 SI 16384  
 SF 400.2000163 MHz  
 WDW EM  
 SSB 0  
 LB 0.30 Hz  
 GB 0  
 PC 1.00

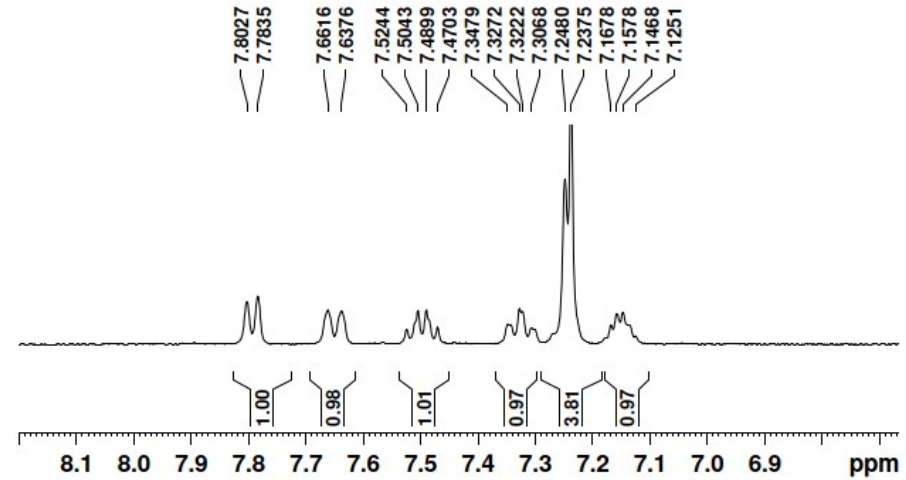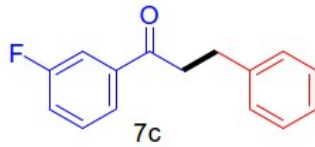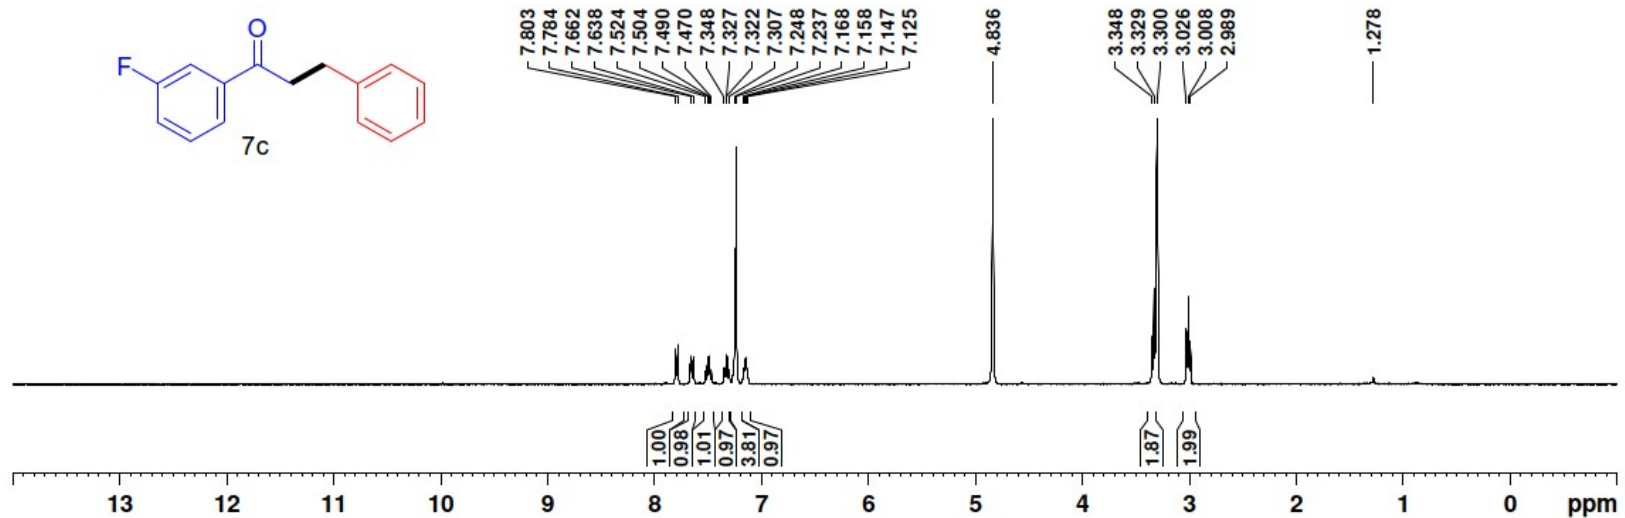

7d IN CDCl3

Current Data Parameters  
 NAME 7d  
 EXPNO 10  
 PROCNO 1  
 F2 - Acquisition Parameters  
 Date\_ 20220105  
 Time 23.40 h  
 INSTRUM spect  
 PROBHD ZS246\_0048 (PH  
 PULPROG zg30  
 TD 24036  
 SOLVENT CDCl3  
 NS 8  
 DS 0  
 SWH 8012.820 Hz  
 FIDRES 0.666735 Hz  
 AQ 1.4998465 sec  
 RG 9  
 DW 62.400 usec  
 DE 6.50 usec  
 TE 300.0 K  
 D1 0 sec  
 TDO 1  
 SFO1 400.1024006 MHz  
 NUC1 1H  
 PO 6.00 usec  
 P1 18.00 usec  
 PLW1 10.0000000 W  
 F2 - Processing parameters  
 SI 16384  
 SF 400.1000135 MHz  
 MDW EM  
 SSB 0  
 LB 0 Hz  
 GB 0  
 PC 1.00

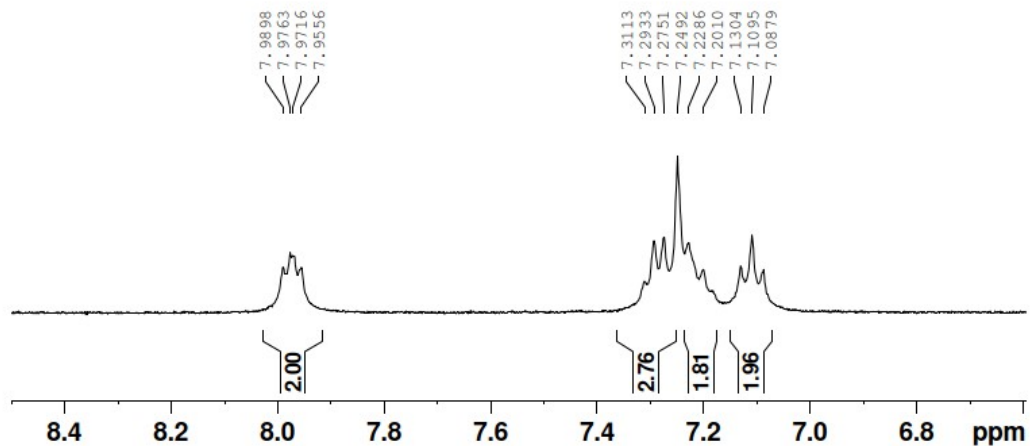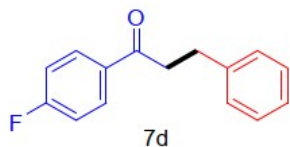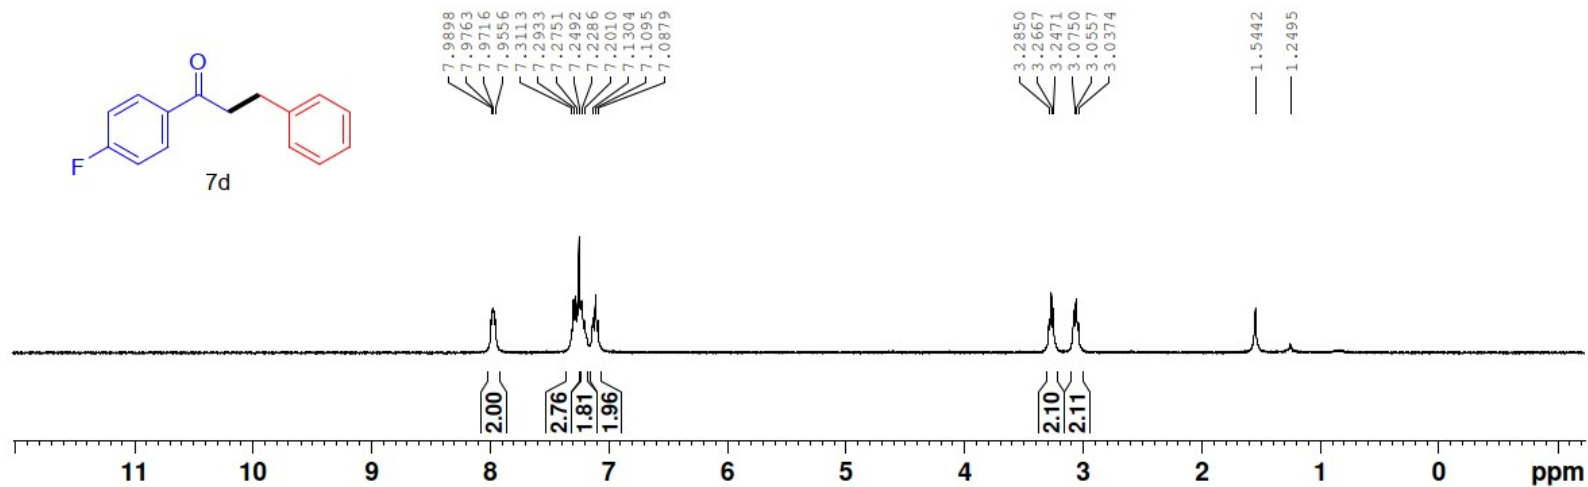

7e IN MeOD

Current Data Parameters  
 NAME 7e  
 EXPNO 10  
 PROCNO 1  
 F2 - Acquisition Parameters  
 DATE\_ 20220127  
 TIME 17:55 h  
 INSTRUM spect  
 PROCNO 2163739\_0162  
 PULPROG zgpg30  
 TD 24836  
 SOLVENT MeOD  
 NS 8  
 DS 0  
 SWH 10026.738 Hz  
 FIDRES 0.834810 Hz  
 AQ 1.1925952 sec  
 RG 185.17  
 CW 49.867 usec  
 DE 2.44 usec  
 TE 295.1 K  
 D1 1.00000000 sec  
 TSD  
 SFO1 400.174710 MHz  
 HSC1 18  
 PO 2.47 usec  
 PC 0.00 usec  
 PFL1 21.75399971 Hz  
 F2 - Processing parameters  
 SI 16384  
 SF 400.1700118 MHz  
 WDW EM  
 SSB 0  
 LB 0.30 Hz  
 GB 0  
 PC 1.00

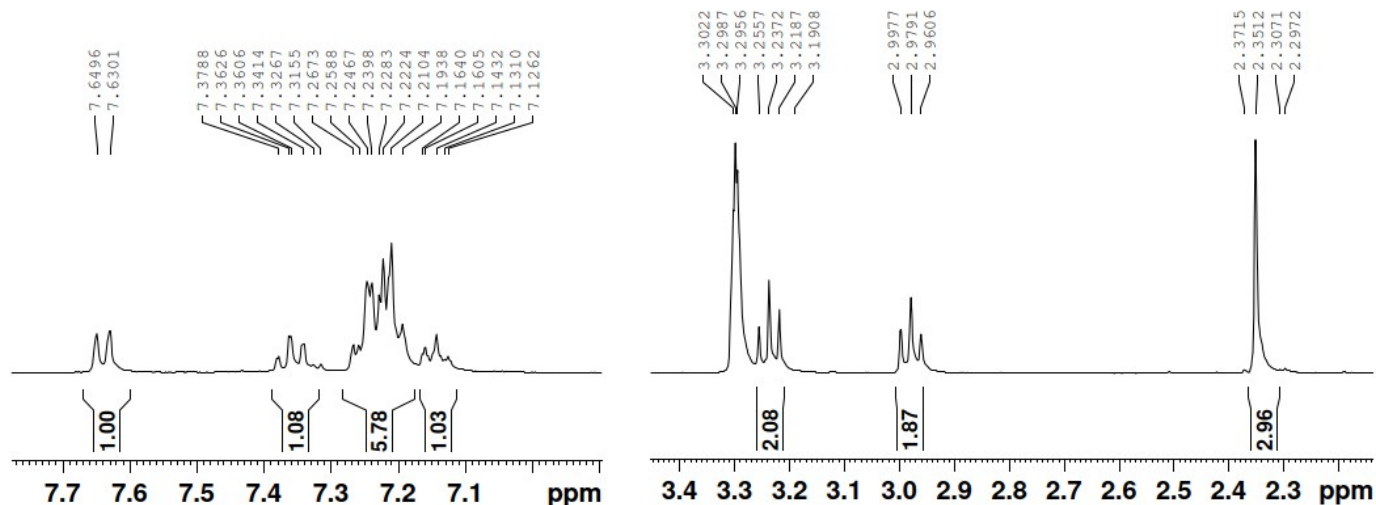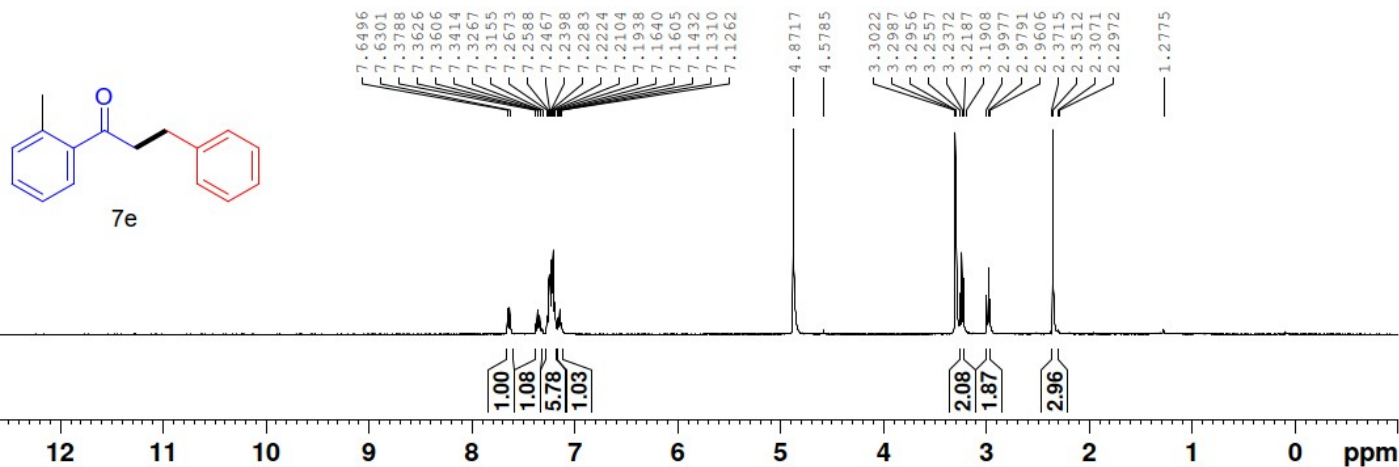



7f IN CDCl3

Current Data Parameters  
 NAME- 7f  
 EXPNO 10  
 PROCNO 1

F2 - Acquisition Parameters  
 Date\_ 20220105  
 Time 23.38 h  
 INSTRUM spect  
 PROBHD Z8246\_0048 (PH)  
 PULPROG zg30  
 TD 24536  
 SOLVENT CDCl3  
 NS 8  
 DS 0  
 SWH 8012.820 Hz  
 FIDRES 0.666735 Hz  
 AQ 1.4998465 sec  
 RG 9  
 DW 62.400 usec  
 DE 6.50 usec  
 TE 300.0 K  
 D1 0 sec  
 TDO 1  
 SFO1 400.1024006 MHz  
 NUC1 1H  
 FO 6.00 usec  
 P1 18.00 usec  
 PLW1 10.00000000 W

F2 - Processing parameters  
 SI 16384  
 SF 400.1000135 MHz  
 NW 5M  
 SSB 0  
 LB 0 Hz  
 GB 0  
 PC 1.00

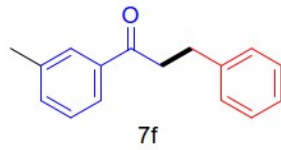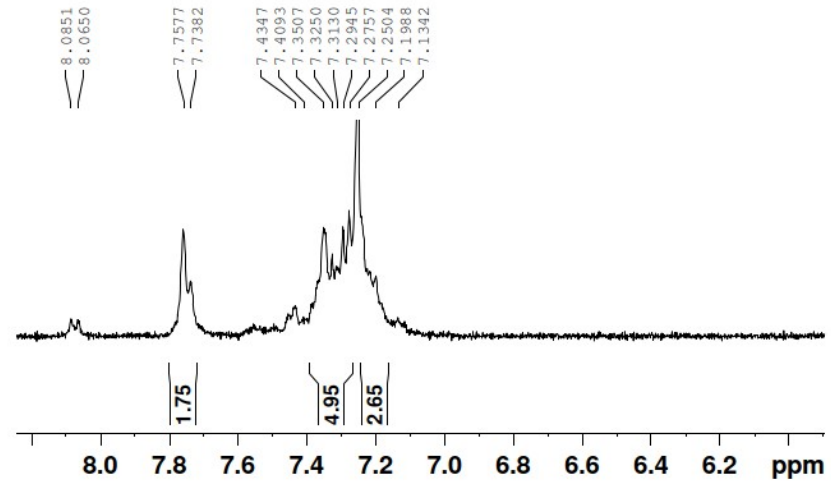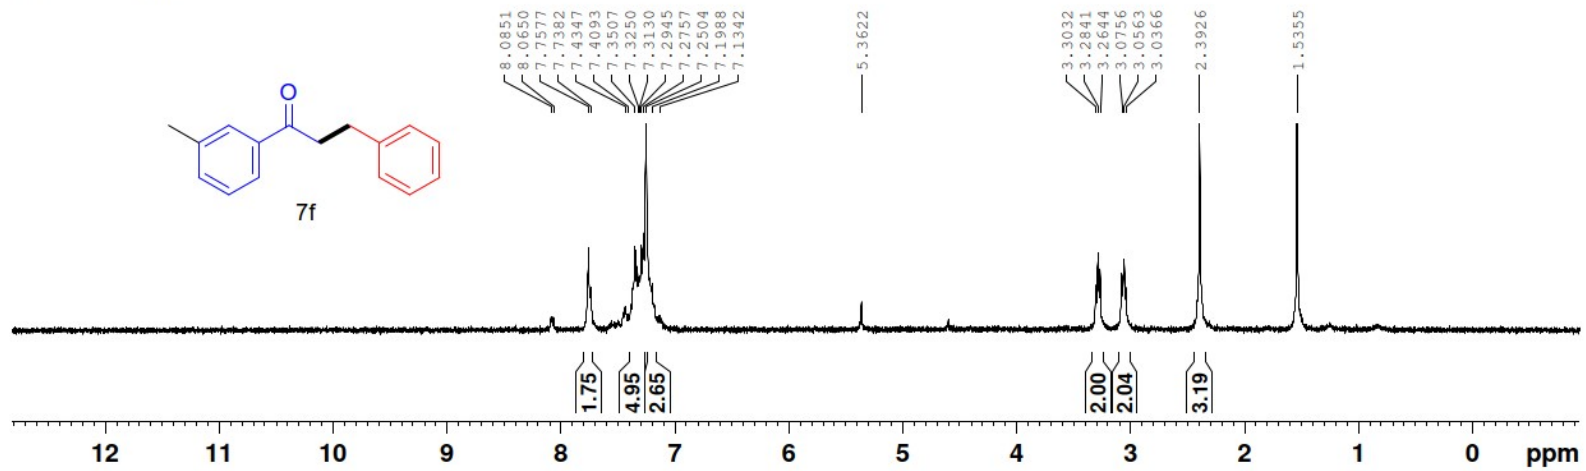

7f IN DMSO

Current Data Parameters  
 NAME 7f  
 EXPNO 10  
 PROCNO 1

F2 - Acquisition Parameters  
 Date\_ 20230506  
 Time 14.31 h  
 INSTRUM Avance  
 PROBHD Z163739.0713 (   
 PULPROG zg30  
 TD 24576  
 SOLVENT DMSO  
 NS 8  
 DS 0  
 SWH 8196.721 Hz  
 FIDRES 0.667051 Hz  
 AQ 1.4991360 sec  
 RG 101  
 DW 61.000 usec  
 DE 13.80 usec  
 TE 298.2 K  
 D1 1.00000000 sec  
 TDO  
 SFO1 400.6024737 MHz  
 NUC1 1H  
 P0 2.67 usec  
 P1 8.00 usec  
 PL1 24.03499985 W

F2 - Processing parameters  
 SI 6536  
 SF 400.6000042 MHz  
 NH 5M  
 SSB 0  
 LB 0.30 Hz  
 GB 0  
 PC 1.00

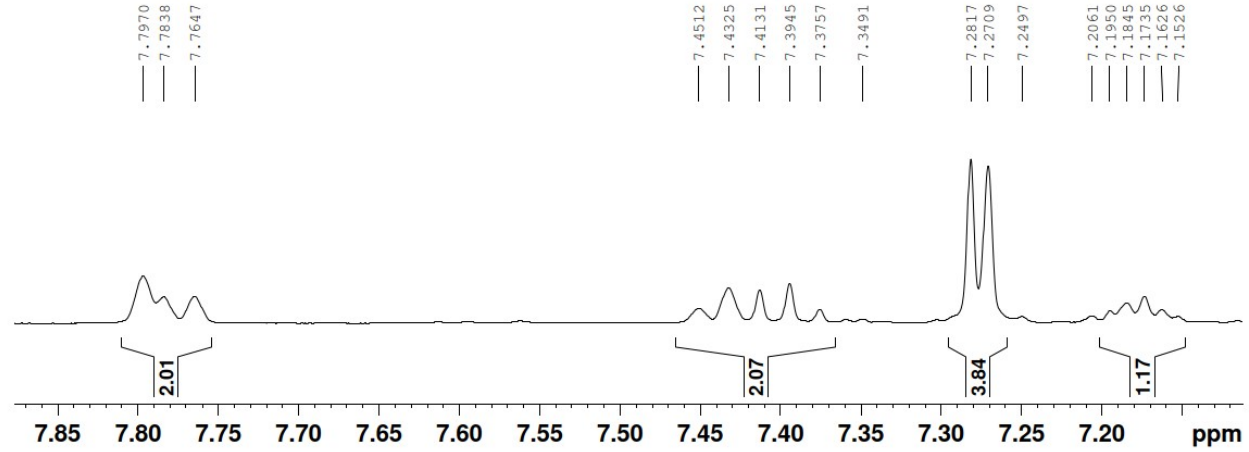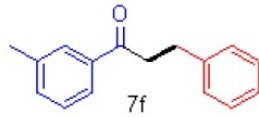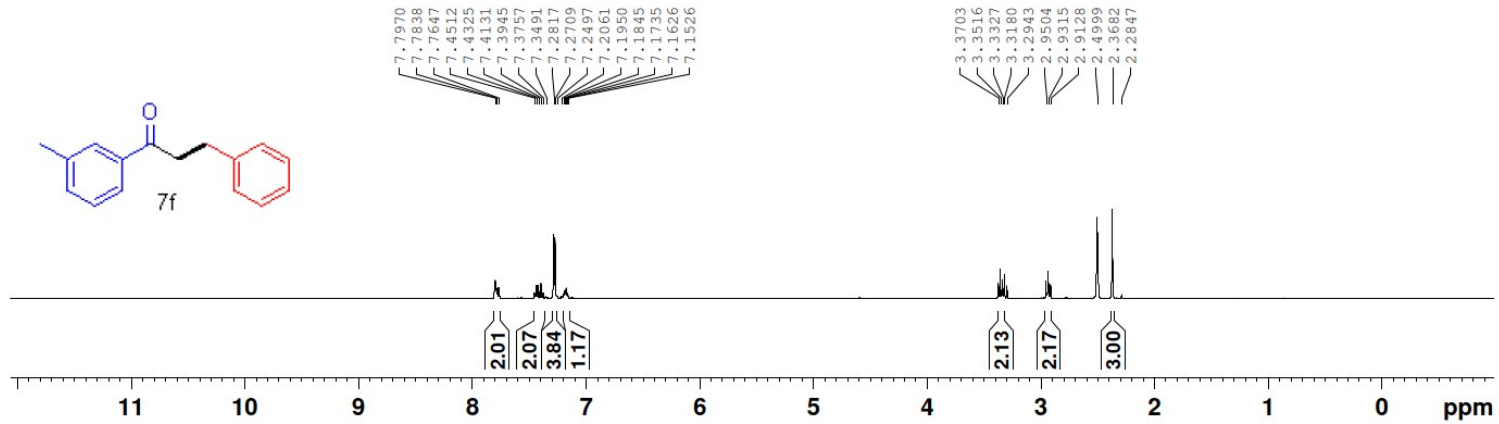

7g IN MeOD

Current Data Parameters  
 NAME 7g  
 EXPNO 10  
 PROCNO 1

F2 - Acquisition Parameters  
 Date\_ 20220121  
 Time 0.28 h  
 INSTRUM spect  
 PROBD 2S246\_0048 (9H)  
 FULPROG zg30  
 TD 24036  
 SOLVENT MeOD  
 NS 8  
 DS 0  
 SWH 8012.820 Hz  
 FIDRES 0.666735 Hz  
 AQ 1.4998465 sec  
 RG 9  
 DW 62.400 usec  
 DE 6.50 usec  
 TE 300.0 K  
 DI 1.00000000 sec  
 TDO 1  
 SFO1 400.1024006 MHz  
 NUCL1 1H  
 P0 6.00 usec  
 P1 18.00 usec  
 PLW1 10.00000000 W

F2 - Processing parameters  
 SI 16384  
 SF 400.100116 MHz  
 WDW EM  
 SSB 0  
 LB 0 Hz  
 GB 0  
 PC 1.00

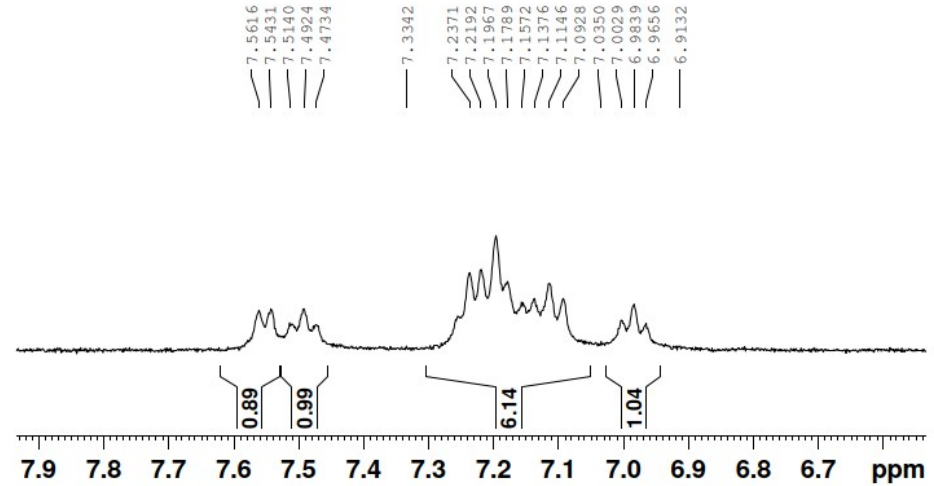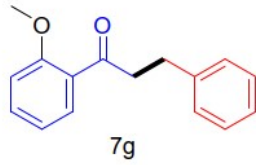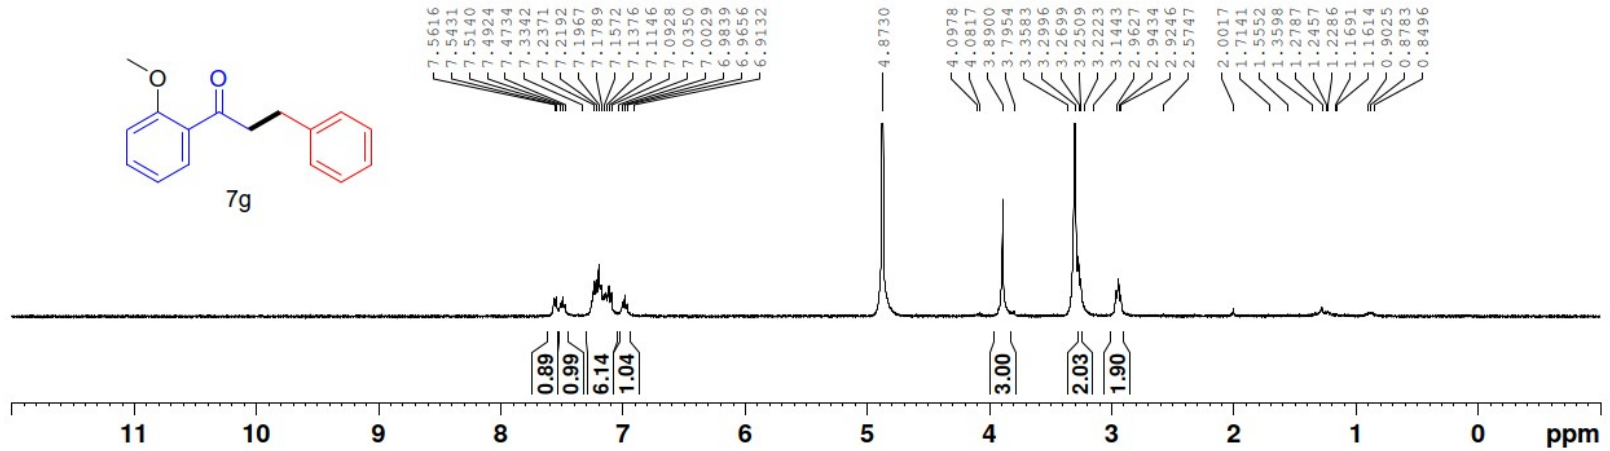

7h IN CDC13

Current Data Parameters  
 NAME 7h  
 EXPNO 10  
 PROCNO 1  
 F2 - Acquisition Parameters  
 Date\_ 20220128  
 Time 20.30 h  
 INSTRUM spect  
 FREQID 28246.0048 (ppm)  
 FULPROG zg30  
 TD 24036  
 SOLVENT cdc13  
 NS 8  
 DS 0  
 SWH 8012.820 Hz  
 FIDRES 0.666735 Hz  
 AQ 1.4998465 sec  
 RG 50.8  
 DW 62.400 usec  
 DE 6.50 usec  
 TE 300.0 K  
 D1 0 sec  
 TDO 1  
 SFO1 400.1024006 MHz  
 NUC1 1H  
 FO 6.00 usec  
 P1 18.00 usec  
 FLN1 10.00000000 M  
 F2 - Processing parameters  
 SI 16384  
 SF 400.1000136 MHz  
 KW 8M  
 SSB 0  
 LB 0 Hz  
 GB 0  
 PC 1.00

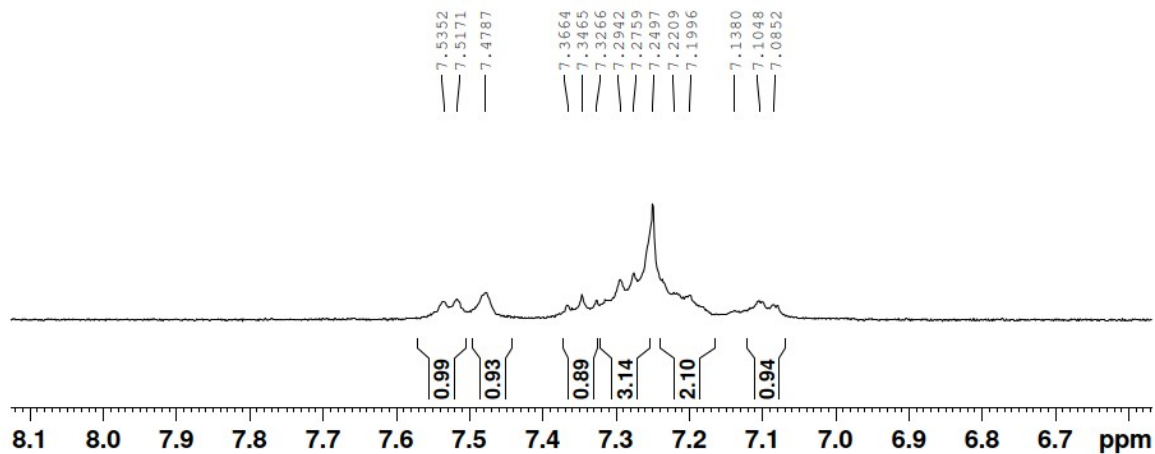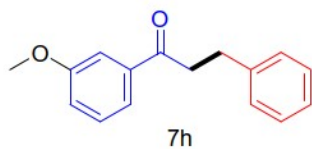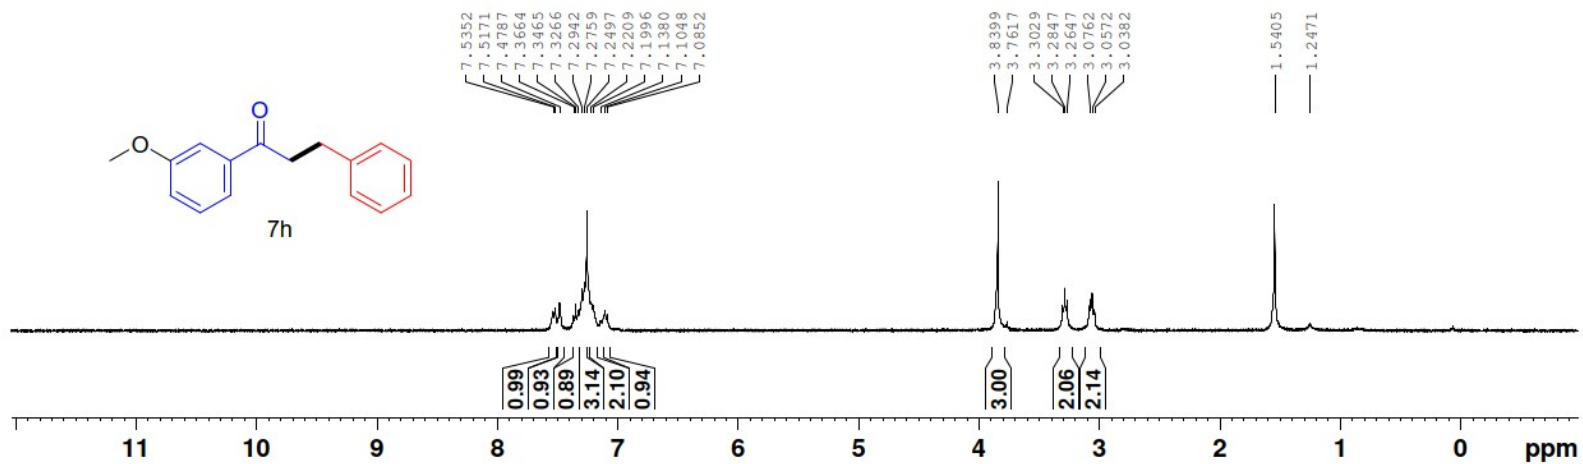

7i IN CDCl3

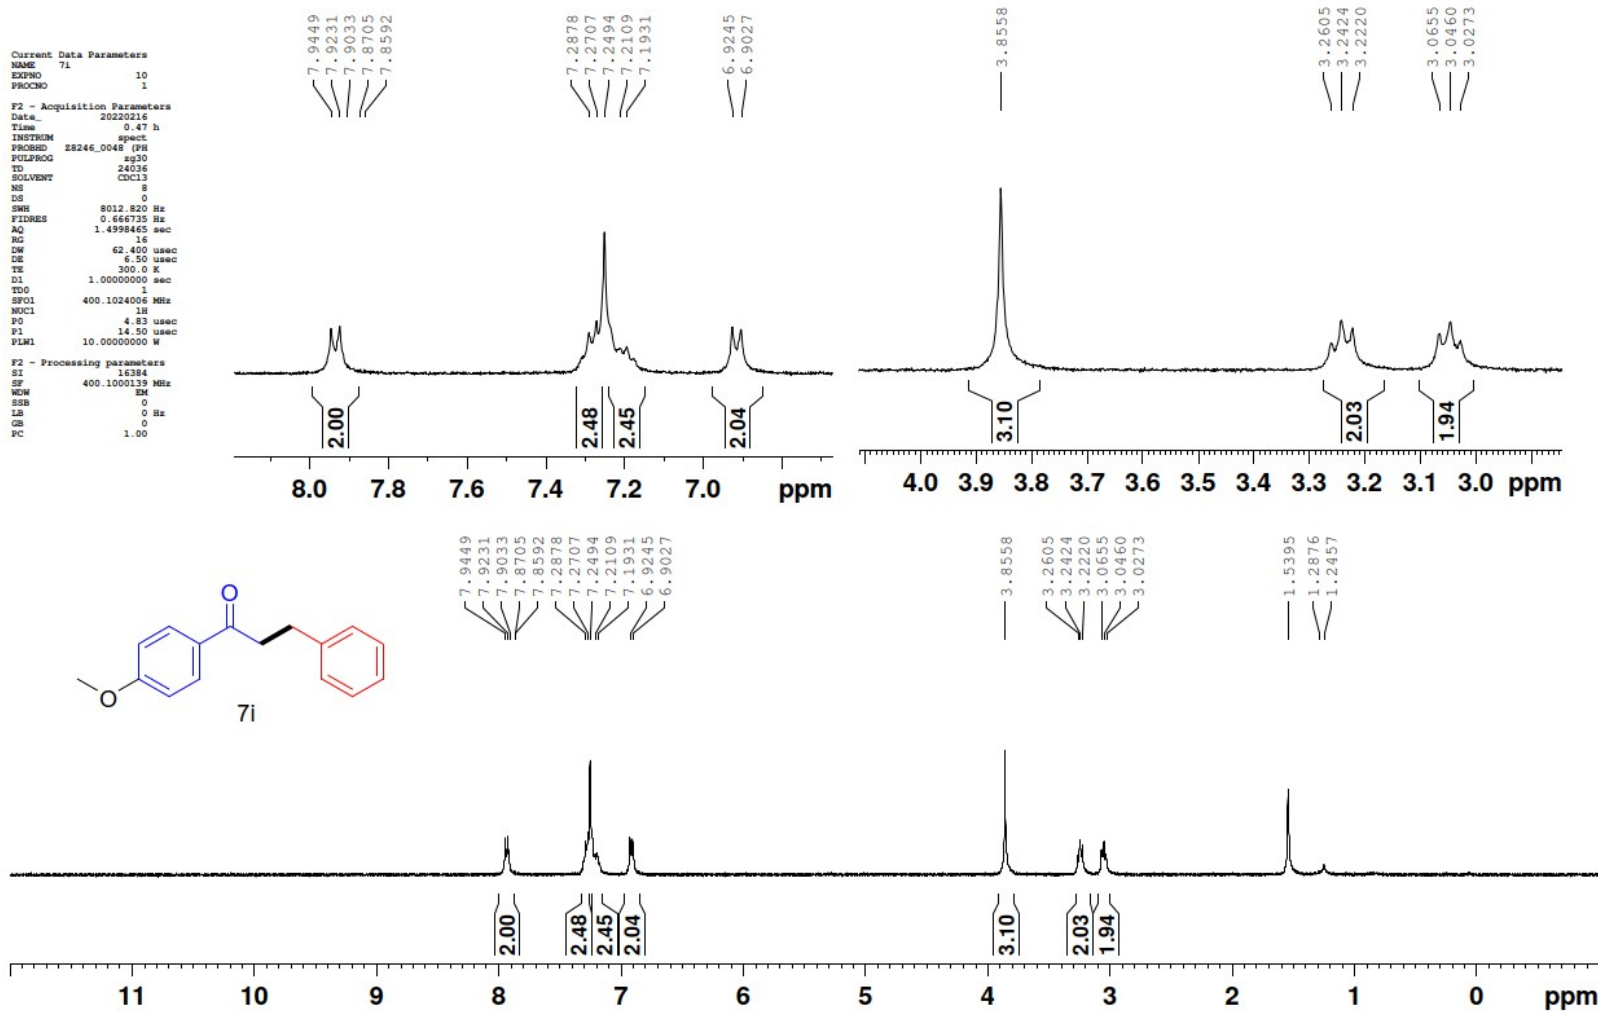

7j IN MeOD

Current Data Parameters  
 NAME 7j  
 EXPNO 10  
 PROCNO 1  
 F2 - Acquisition Parameters  
 Date\_ 20220124  
 Time 9.45 h  
 INSTRUM spect  
 PRBBDH 1163739.0162 ( Hz)  
 PULPROG zg30  
 TD 24626  
 SOLVENT MeOD  
 NS 8  
 DS 0  
 SWH 10026.738 Hz  
 FIDRES 0.824310 Hz  
 AQ 1.1985952 sec  
 RG 185.17  
 SW 49.867 usec  
 DE 8.44 usec  
 TE 298.1 K  
 TD 1.00000000 sec  
 SFO1 400.1724710 MHz  
 MUC1 18  
 PO 2.67 usec  
 P1 8.00 usec  
 PLK1 21.78399973 W  
 F2 - Processing parameters  
 SI 16384  
 SF 400.1700116 MHz  
 WCN 8M  
 SSB 0  
 LB 0.30 Hz  
 GB 0  
 PC 1.00

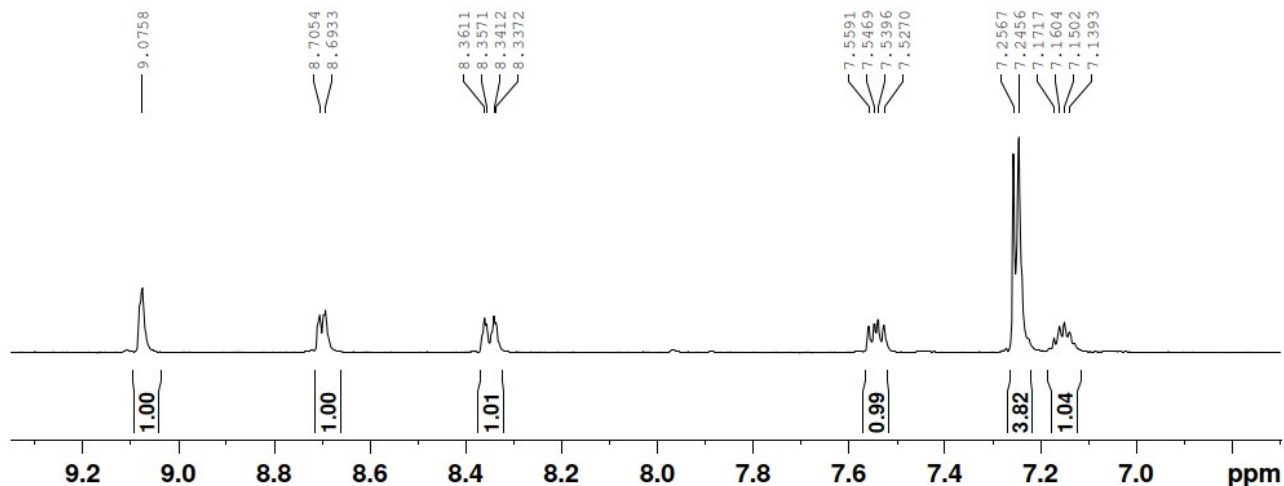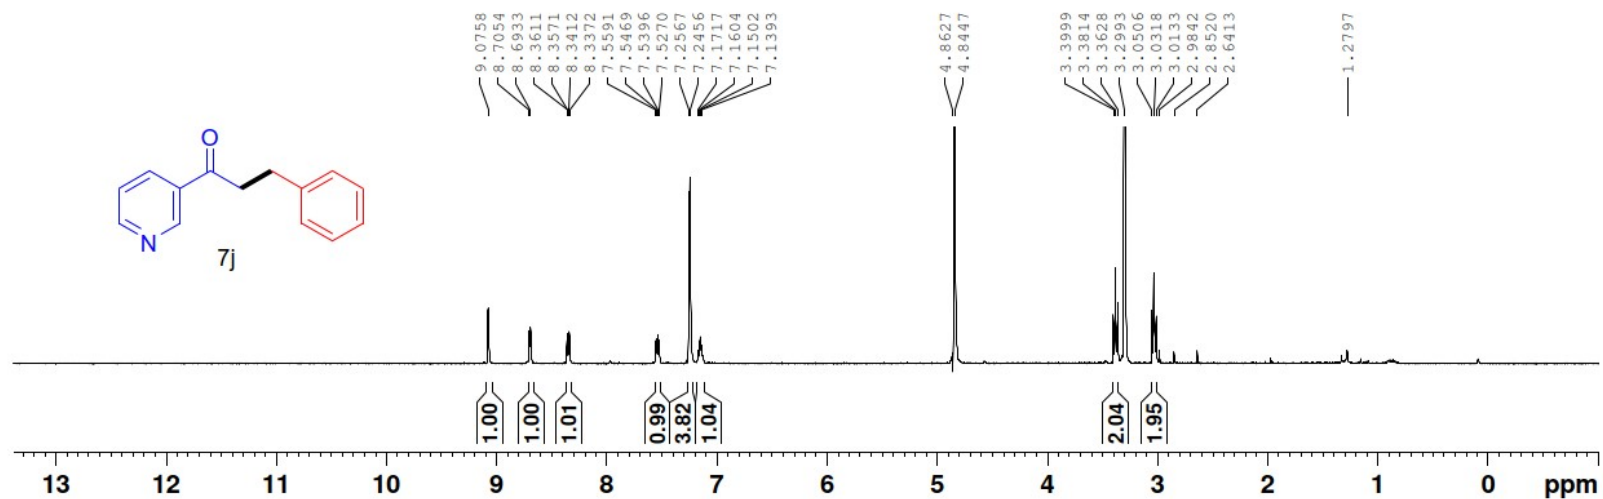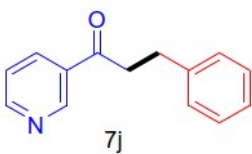

7k IN MeOD

```

Current Data Parameters
NAME      7k
EXPNO    10
PROCNO   1

F2 - Acquisition Parameters
Date_    20220124
Time     12.02 h
INSTRUM  spect
PROBHD   z163739_0162
PULPROG  zg30
TD        24036
SOLVENT  MeOD
NS        32
DS        0
SWH       10026.738 Hz
FIDRES    0.834310 Hz
AQ         1.1985952 sec
RG         185.17
DN         49.867 usec
DE         8.44 usec
TE         298.2 K
D1         1.00000000 sec
TDO        1
SFO1      400.1724710 MHz
NUC1       1H
PC         2.67 usec
P1         8.00 usec
PLW1      21.75399971 W

F2 - Processing parameters
SI         16384
SF         400.1700116 MHz
WDW        EM
SSB        0
LB         0.30 Hz
GB         0
PC         1.00
    
```

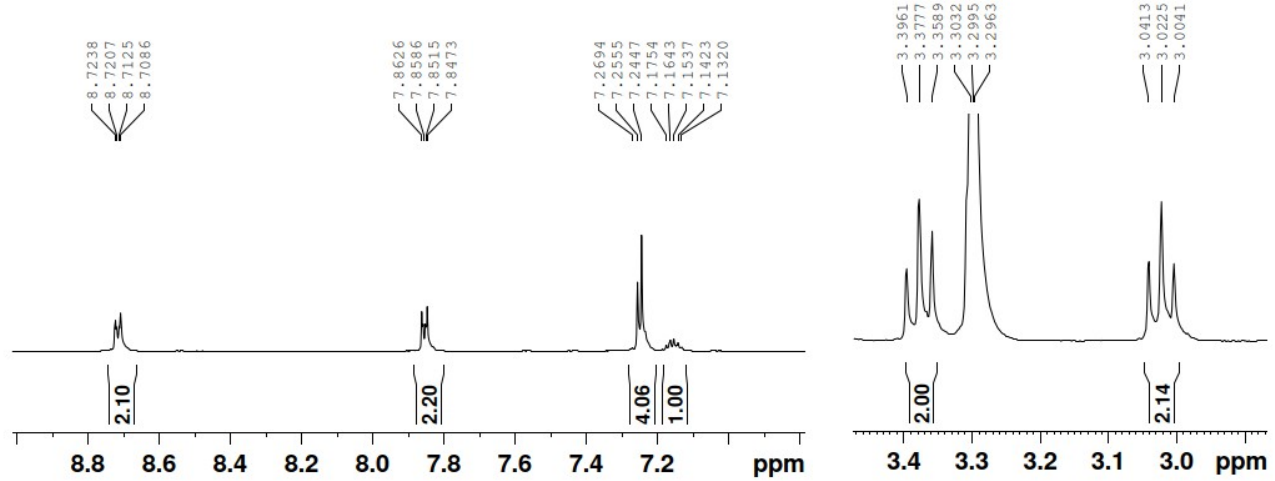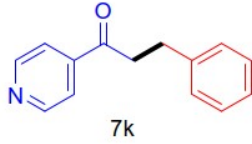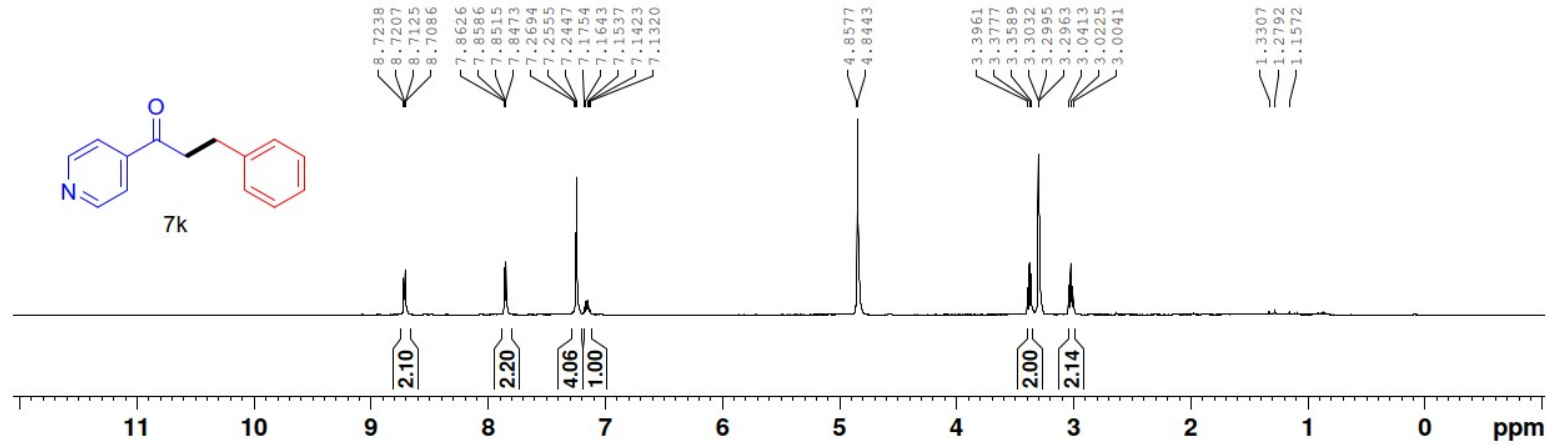

71 IN MeOD

Current Data Parameters  
 NAME 71  
 EXPNO 10  
 PROCNO 1  
 F2 - Acquisition Parameters  
 Date\_ 20220121  
 Time 8.31 h  
 INSTRUM spect  
 PROBRD Z163739\_0162 ( )  
 PULPROG zg30  
 TD 24936  
 SOLVENT MeOD  
 NS 8  
 DS 0  
 SWH 8012.820 Hz  
 FIDRES 0.666735 Hz  
 AQ 1.4998465 sec  
 RG 141.96  
 DW 62.400 usec  
 DE 18.11 usec  
 TE 296.7 K  
 D1 1.0000000 sec  
 TDD 1  
 SFO1 400.1724710 MHz  
 NUC1 1H  
 FO 2.67 usec  
 P1 8.00 usec  
 PLW1 21.75399971 W  
 F2 - Processing parameters  
 SI 16384  
 SF 400.1700118 MHz  
 WDW EM  
 SSB 0  
 LB 0.30 Hz  
 GB 0  
 PC 1.00

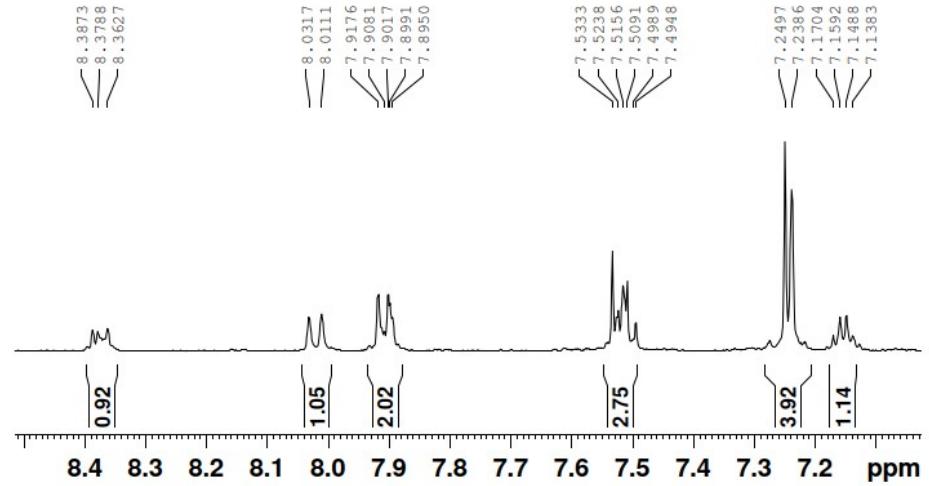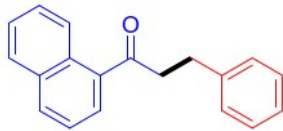

71

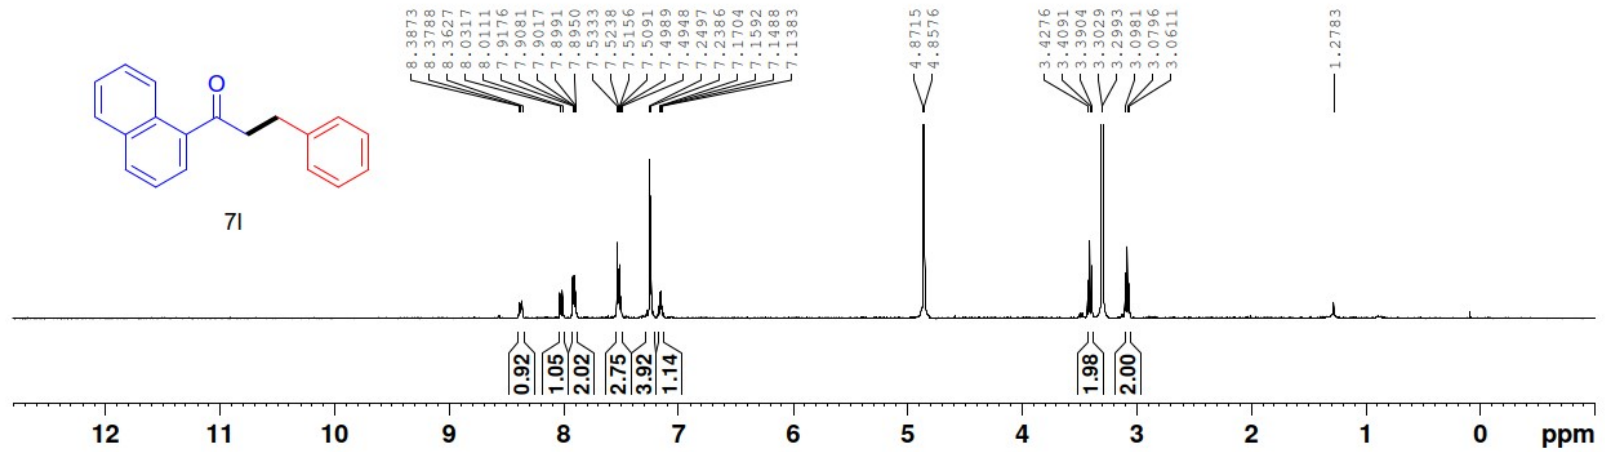



7m IN CDCl3

Current Data Parameters  
 NAME 7m  
 EXPNO 10  
 PROCNO 1

F2 - Acquisition Parameters  
 Date\_ 20220114  
 Time 18.29 h  
 INSTRUM spect  
 PROBHD Z163739\_0162 ( )  
 PULPROG zg30  
 TD 24036  
 SOLVENT CDCl3  
 NS 8  
 DS 0  
 SWH 8012.320 Hz  
 FIDRES 0.666735 Hz  
 AQ 1.4998964 sec  
 RG 202.6  
 DW 62.400 usec  
 DE 18.11 usec  
 TE 296.8 K  
 D1 0.00000000 sec  
 TDO 1  
 SFO1 400.1724710 MHz  
 NUC1 1H  
 PD 2.67 usec  
 P1 8.00 usec

F2 - Processing parameters  
 SI 16384  
 SF 400.1700139 MHz  
 EI 1  
 WDW EM  
 SSB 0  
 LB 0.30 Hz  
 GB 0  
 PC 1.00

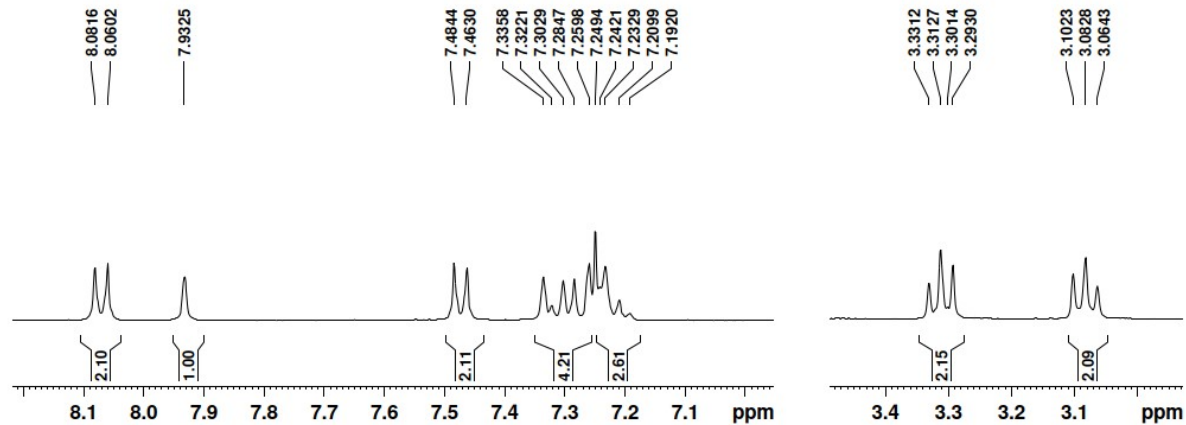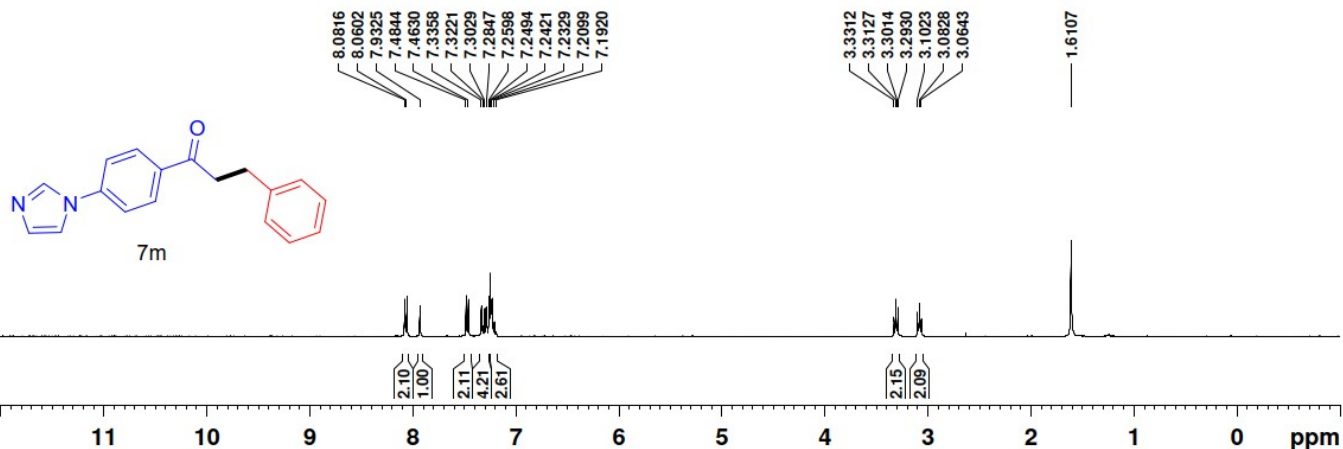

7m IN CDC13-13C

```

Current Data Parameters
NAME 7m
EXPNO 60
PROCNO 1

F2 - Acquisition Parameters
Date_ 20220226
Time 12:59 h
INSTRUM spect
PROBHD 5163739_0162 (
PULPROG zgpg30
SO 32768
SOLVENT CDC13
NS 377
DS 4
SWH 25252.525 Hz
FIDRES 1.541299 Hz
AQ 0.6488064 sec
RG 258.6
SW 19.800 usac
DE 6.50 usac
TE 298.2 K
D1 2.00000000 sec
D11 0.03000000 sec
TD 1
SFO1 100.6288880 MHz
NUC1 13C
P0 2.47 usac
P1 8.00 usac
PLW1 80.42453360 W
SFO2 400.1716007 MHz
NUC2 1H
CPDPRG12 waltz160
P02 90.00 usac
PLW2 21.79299871 W
SFO3 2.17168001 W
PLW3 0.08645400 W

F2 - Processing parameters
SI 16384
SF 100.6288880 MHz
WDW EM
SSB 0
LB 1.00 Hz
GB 0
PC 1.40
    
```

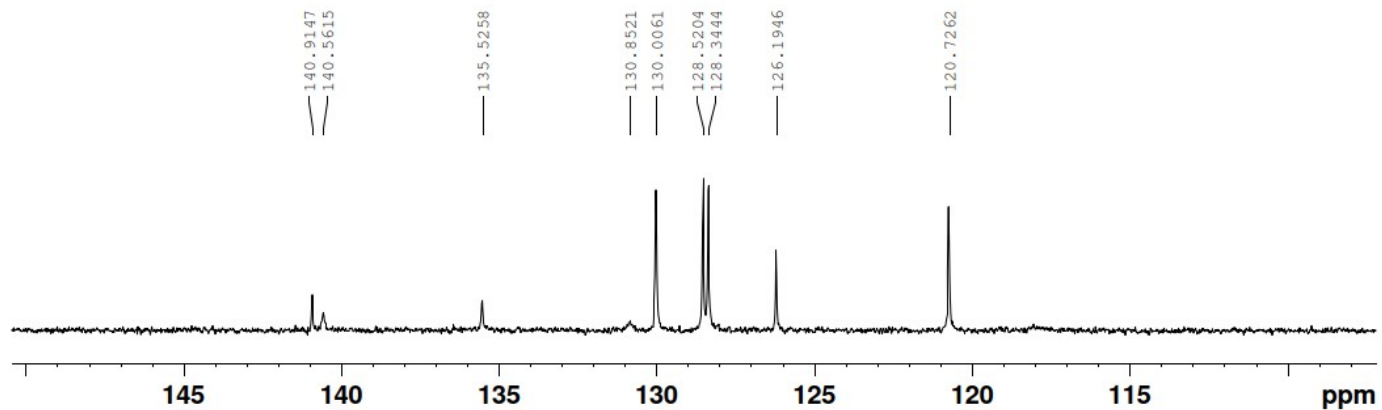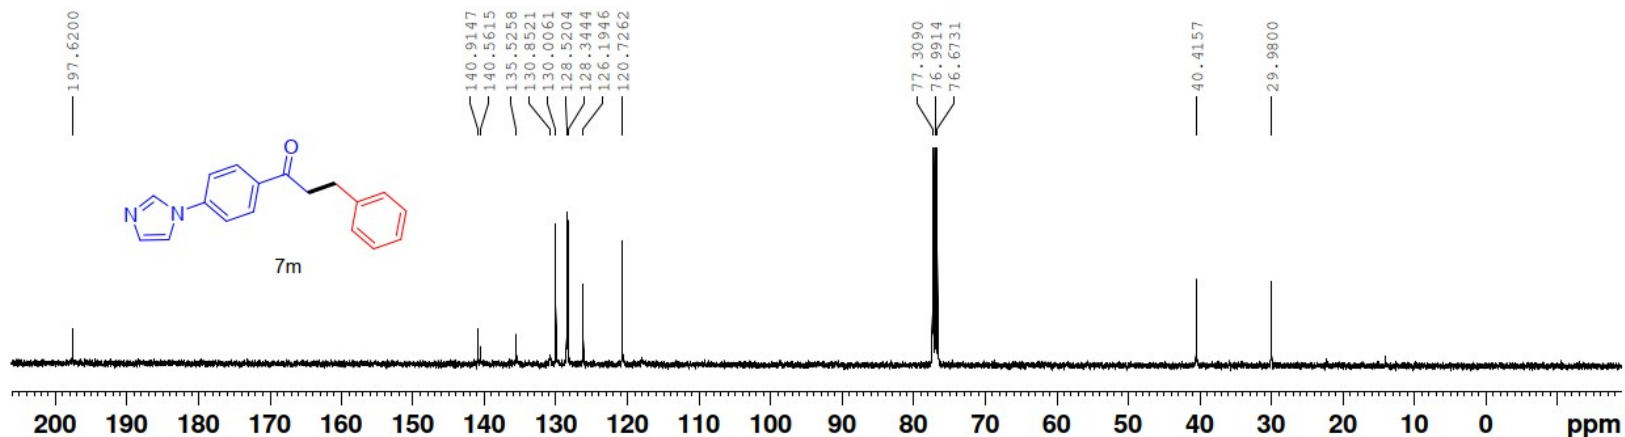

7m IN CDC13-APT

```

Current Data Parameters
NAME 7m
EXPNO 61
PROCNO 1

F2 - Acquisition Parameters
Date_ 20220226
Time 13:09 h
INSTRUM spect
PROBHD 5163739_0162 (
PULPROG zgpg30
TD 32768
SOLVENT CDC13
NS 214
DS 8
SWH 25252.525 Hz
FIDRES 1.5612392 Hz
AQ 0.6488564 sec
RG 258.6
DW 19.800 usec
DE 6.50 usec
TE 298.2 K
CNS2 145.0000000
CNS11 1.0000000
SI 2.00000000 sec
DQ 0.00689435 sec
YD0 1
SF01 100.6328898 MHz
NUC1 13C
P1 8.00 usec
P2 16.00 usec
PL1 80.42400360 W
PL2 400.1716007 W
PCPD02 wait85
PCPD 80.00 usec
PLM2 21.75399971 W
PLM3 0.17188001 W

F2 - Processing parameters
SI 14384
SF 100.6228898 MHz
WDW EM
SSB 0
LA 1.00 Hz
GB 0
PC 1.40
    
```

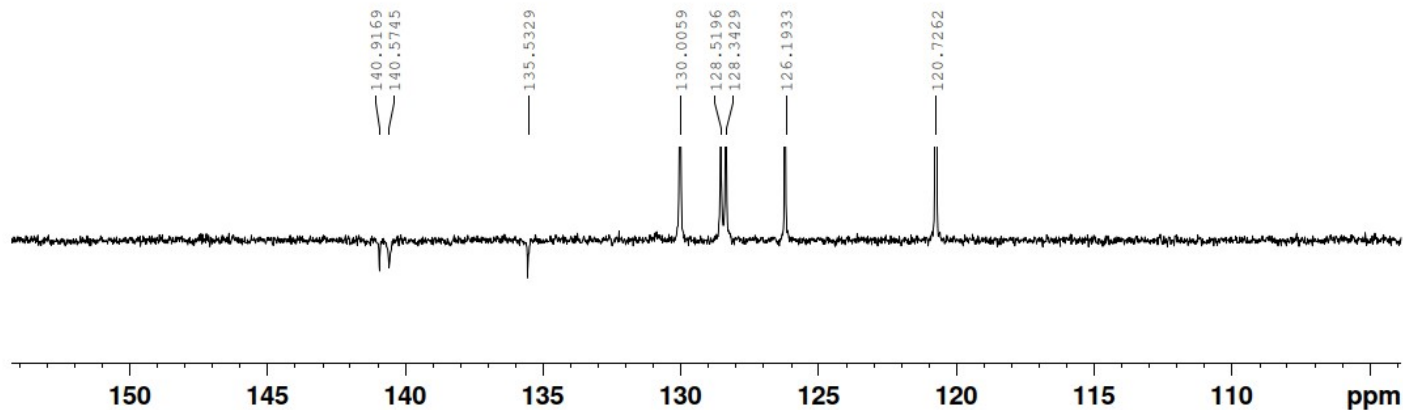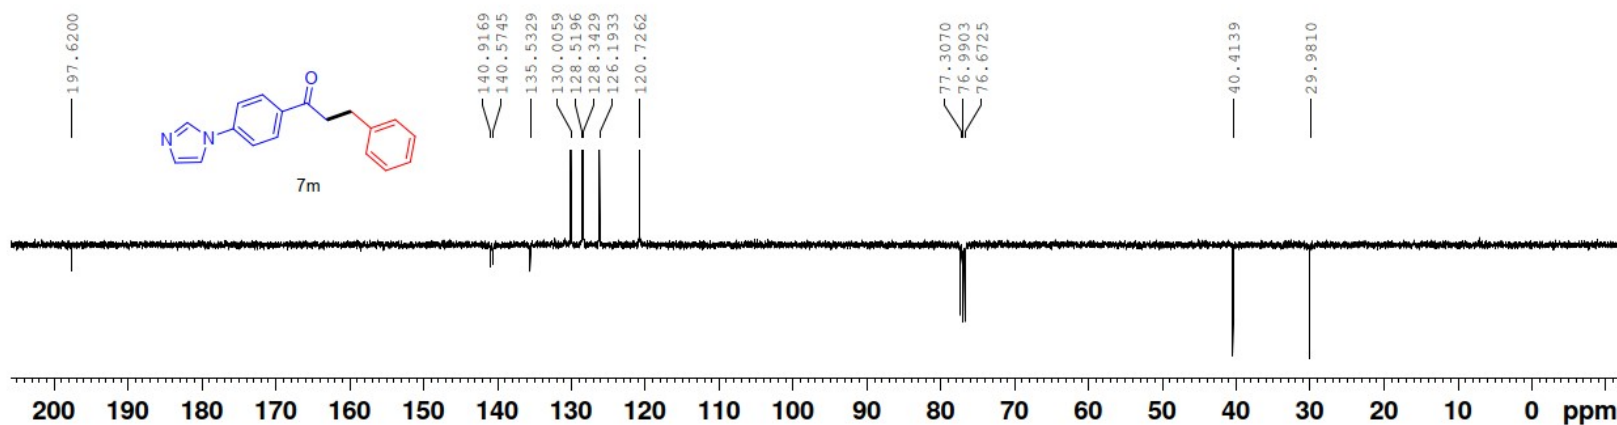

7n IN CDC13

```

Current Data Parameters
NAME      7n
EXPNO    10
PROCNO   1

F2 - Acquisition Parameters
Date_    20220202
Time     18.08 h
INSTRUM  spect
PROBHD   zg30
PULPROG  zgpg30
TD       65536
SOLVENT  CDCl3
NS       8
DS       0
SWH      8012.820 Hz
FIDRES   0.646730 Hz
AQ       1.4998465 sec
RG       16
RW       62.400 usec
DE       6.50 usec
TE       300.0 K
D1       1.00000000 sec
TD0      400.1024006 MHz
NUC1     1H
PC       6.00 usec
P1       18.00 usec
PL1     10.00000000 W

F2 - Processing parameters
SI       16384
SF       400.1000134 MHz
WDW      EM
SSB      0
LB       0 Hz
GB       0
PC       1.00
    
```

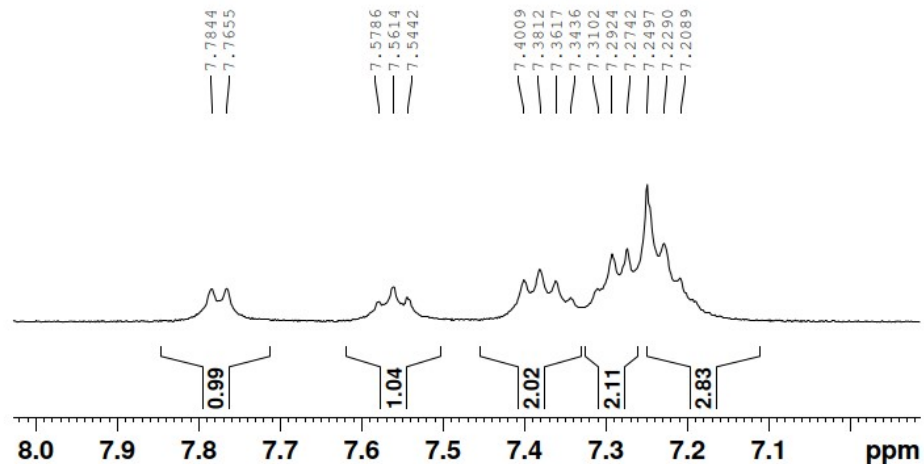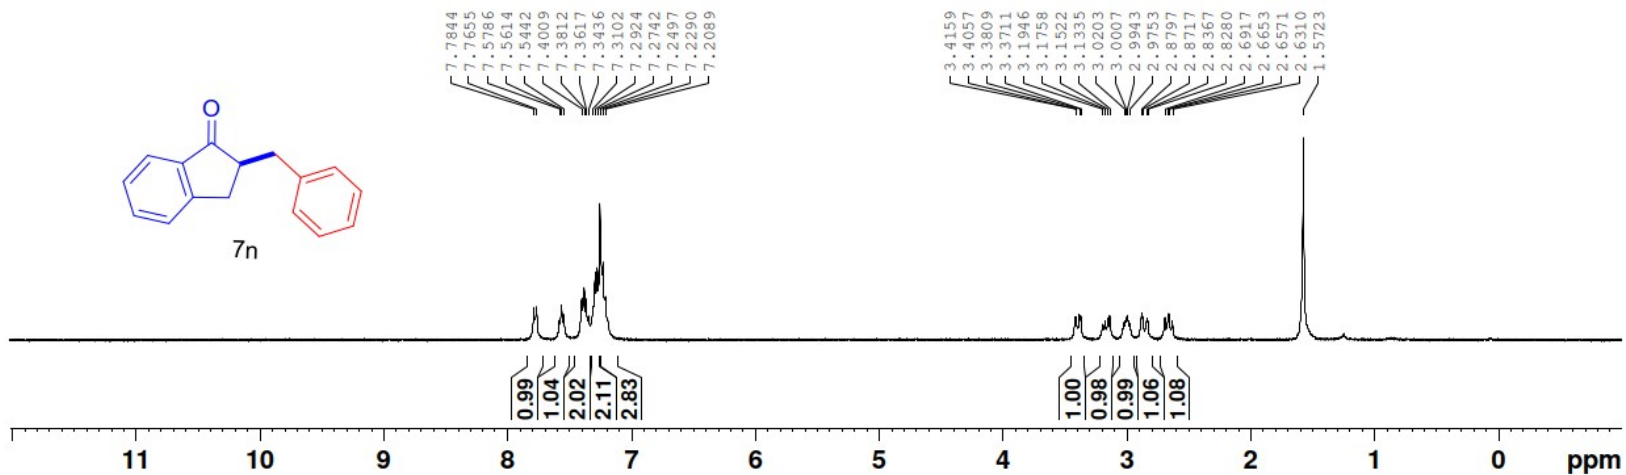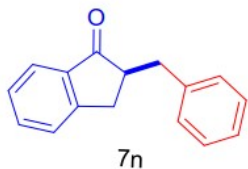

7o IN CDCl3

Current Data Parameters  
NAME 7o  
EXPNO 10  
PROCNO 1  
F2 - Acquisition Parameters  
Date\_ 20220202  
Time 18.06 h  
INSTRUM spect  
PROBHD ZS246.0048 (PS)  
PULPROG zgpg30  
TD 24536  
SOLVENT cdcl3  
NS 8  
DS 0  
SWH 8012.820 Hz  
FIDRES 0.466735 Hz  
AQ 1.4998463 sec  
RG 16  
DW 62.400 usec  
DE 6.50 usec  
TE 300.0 K  
D1 1.00000000 sec  
TDD 400.1024006 MHz  
NUC1 13  
PC 6.00 usec  
P1 15.00 usec  
PLM1 10.00000000 W  
F2 - Processing parameters  
SI 16384  
SF 400.1006134 MHz  
WDW EM  
SSB 0  
LB 0 Hz  
GB 0  
PC 1.00

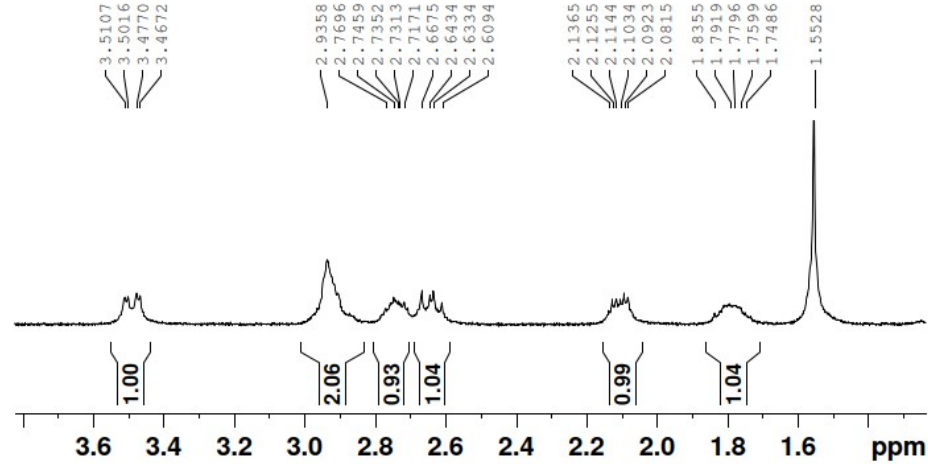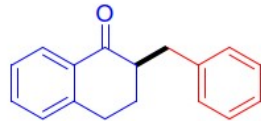

7o

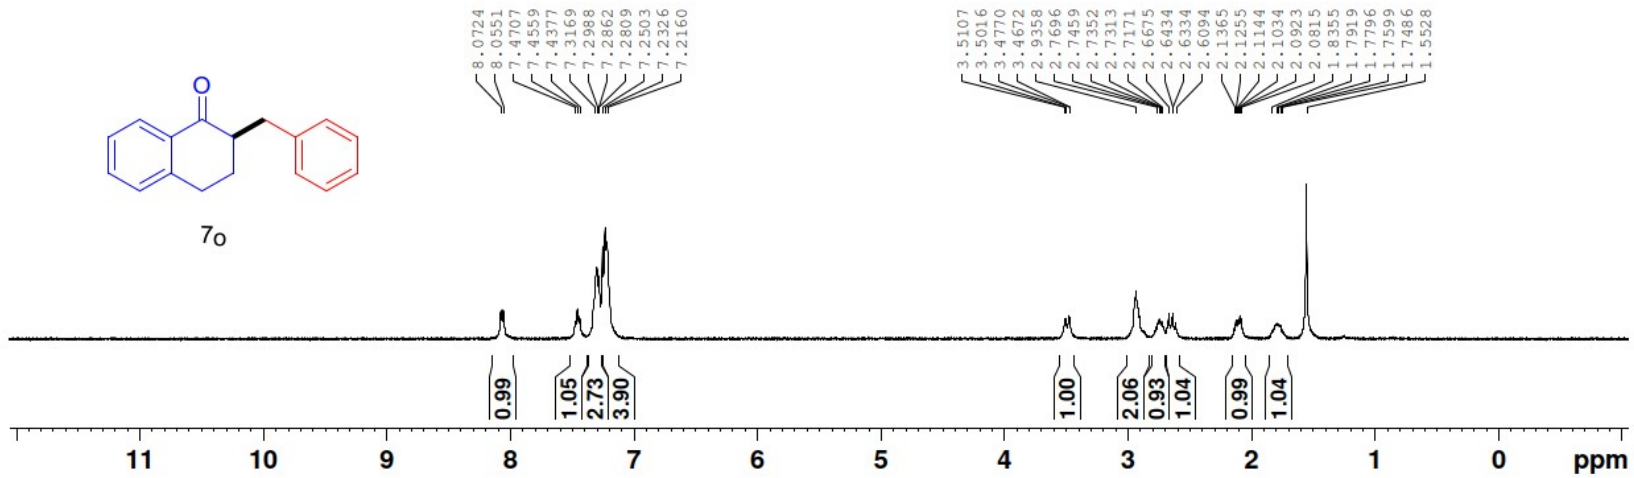

7p IN CDC13

Current Data Parameters  
NAME 7p  
EXPNO 10  
PROCNO 1  
F2 - Acquisition Parameters  
Date\_ 20220211  
Time 6:14 h  
INSTRUM spect  
PROBHD 5163739\_0163 C  
PULPROG zg30  
TD 24224  
SOLVENT CDC13  
NS 8  
DS 0  
SWH 12019.230 Hz  
FIDRES 1.000102 Hz  
AQ 0.9998776 sec  
RG 40.3  
DM 43.400 usec  
DE 11.41 usec  
TE 295.5 K  
TD 1.00000000 sec  
DQ 1  
SFO1 400.1724710 MHz  
NUC1 1H  
P0 2.67 usec  
P1 8.00 usec  
PLW1 21.75399871 W  
F2 - Processing parameters  
SI 32768  
SF 400.1705136 MHz  
WDW EM  
SSB 0  
LB 0.30 Hz  
GB 0  
PC 1.00

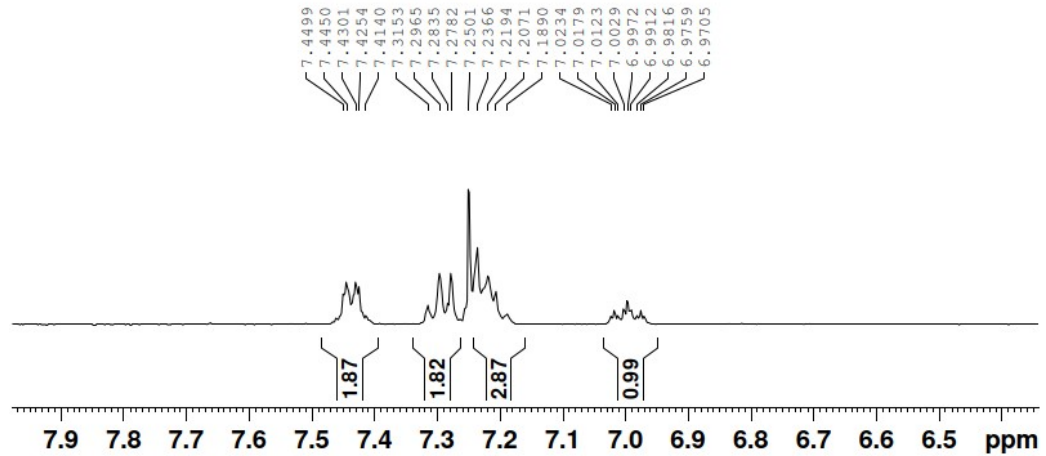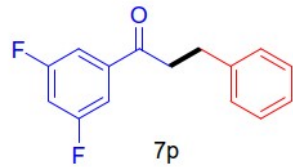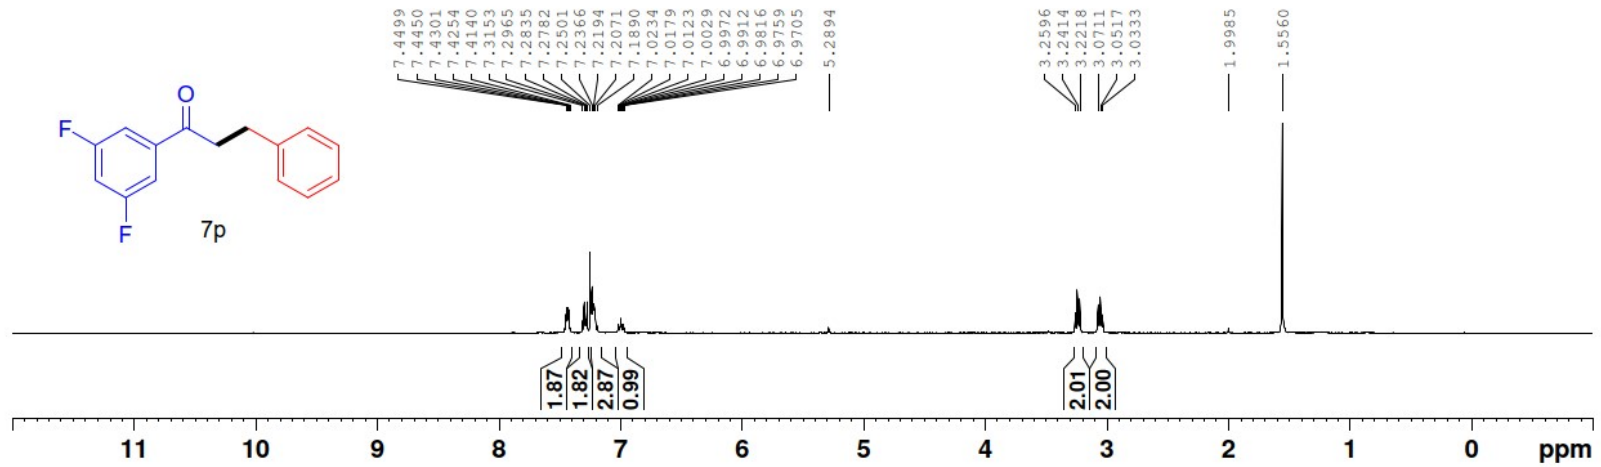

7q IN CDCl3

```

Current Data Parameters
NAME 7q
EXPNO 10
PROCNO 1

F2 - Acquisition Parameters
Date_ 20220211
Time 22.52 h
INSTRUM spect
PROBHD zgpg30
PULPROG zgpg30
TD 24576
SOLVENT CDCl3
NS 8
DS 8
SWH 8012.820 Hz
FIDRES 0.866735 Hz
AQ 1.4998465 sec
RG 50.0
SQ 42.400 usec
SE 6.50 usec
TE 300.0 K
VE 1.00000000 usec
SI 1
TOD 1
SFO1 400.1024006 MHz
NOC1 16
PO 6.00 usec
PI 18.00 usec
P1M1 10.00000000 W

F2 - Processing parameters
SI 16394
SF 400.1005134 MHz
WDW EM
SSB 0
GB 0
PC 1.00
    
```

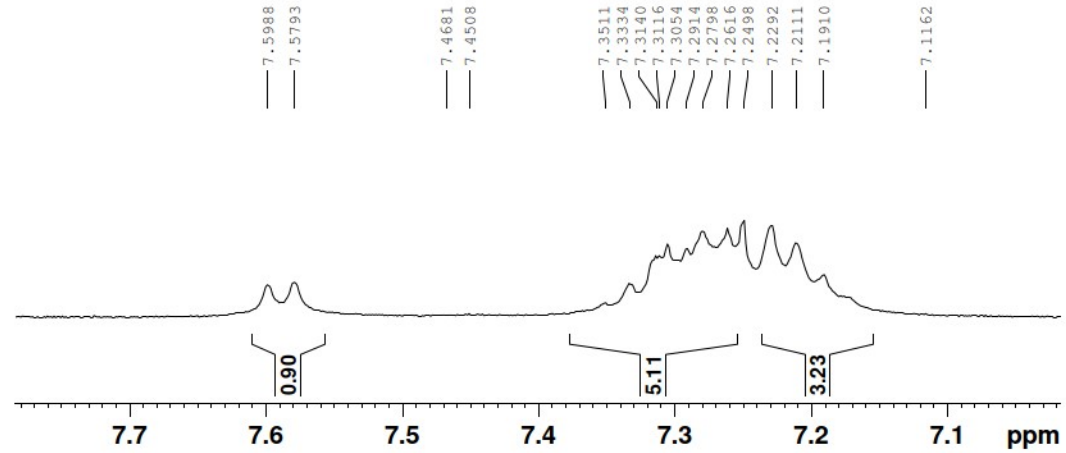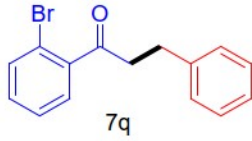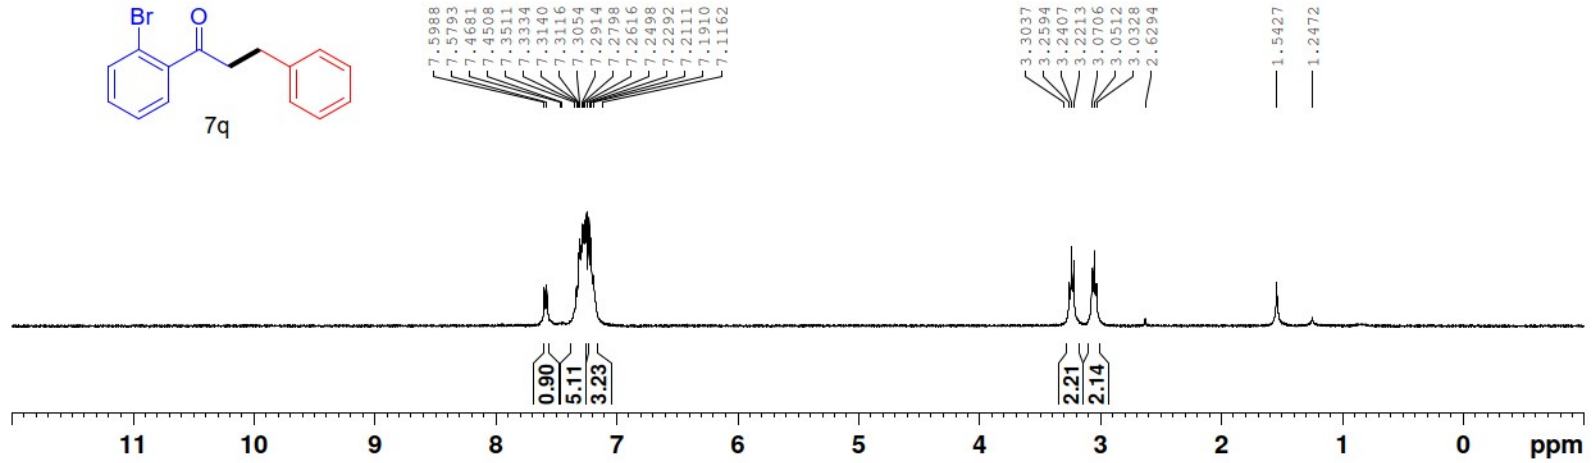

7r IN CDCl3

```

Current Data Parameters
NAME 7r
EXPNO 10
PROCNO 1
F2 - Acquisition Parameters
Date_ 20220211
Time 12:50 h
INSTRUM spect
PROBHD 5mm QNP 1H
PULPROG zgpg30
TD 65536
SOLVENT CDCl3
NS 2
DS 0
SWH 8012.800 Hz
FIDRES 0.466735 Hz
AQ 1.4998465 sec
RG 512
DM 62.400 usec
DE 6.50 usec
TE 300.2 K
D1 1.00000000 sec
TDO 1
SFO1 400.1024000 MHz
NUC1 1H
PD 6.00 usec
PI 18.00 usec
PL1 10.00000000 W
F2 - Processing parameters
SI 32768
SF 400.100124 MHz
WDW EM
SSB 0
LA 0 Hz
GB 0
PC 1.00
    
```

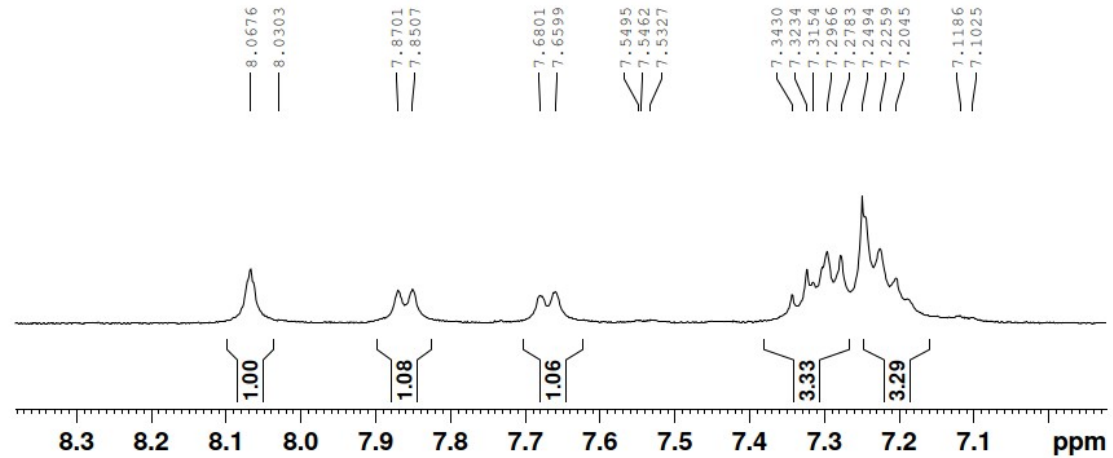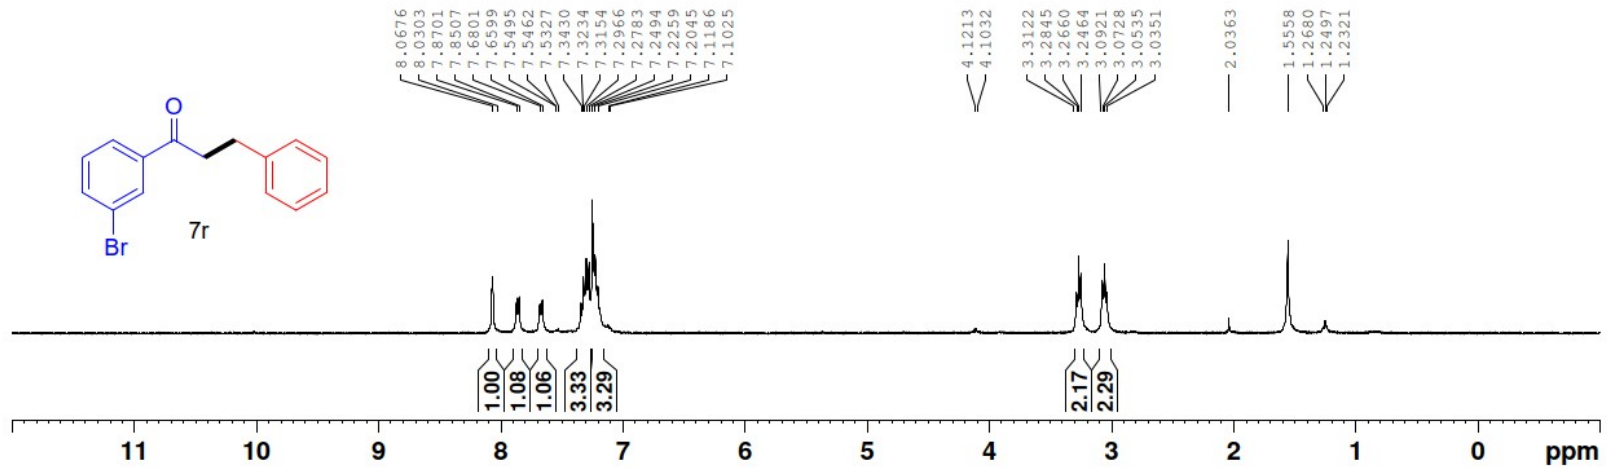



```

Current Data Parameters
NAME      7a
EXPNO    10
PROCNO   1
F2 - Acquisition Parameters
Date_    20220210
Time     20:30 h
INSTRUM  spect
PROBHD   zgpg30
PULPROG  zgpg30
TD       65536
SOLVENT  CDCl3
NS       4
DS       4
SWE      8012.820 Hz
FIDRES   0.664735 Hz
AQ        1.4998465 sec
RG         9
SW        62.400 usec
SR         6.50 usec
SE        300.0 K
TE        1.00000000 sec
YD0       1
SFO1     400.1024004 MHz
NUC1      13C
PC        6.00 usec
PI        18.00 usec
PLM1     10.00000000 W
F2 - Processing parameters
SI        32768
SF        400.1000134 MHz
WDW       EM
SSB       0
LB        0 Hz
GB        0
PC        1.00

```

7s IN CDCl3

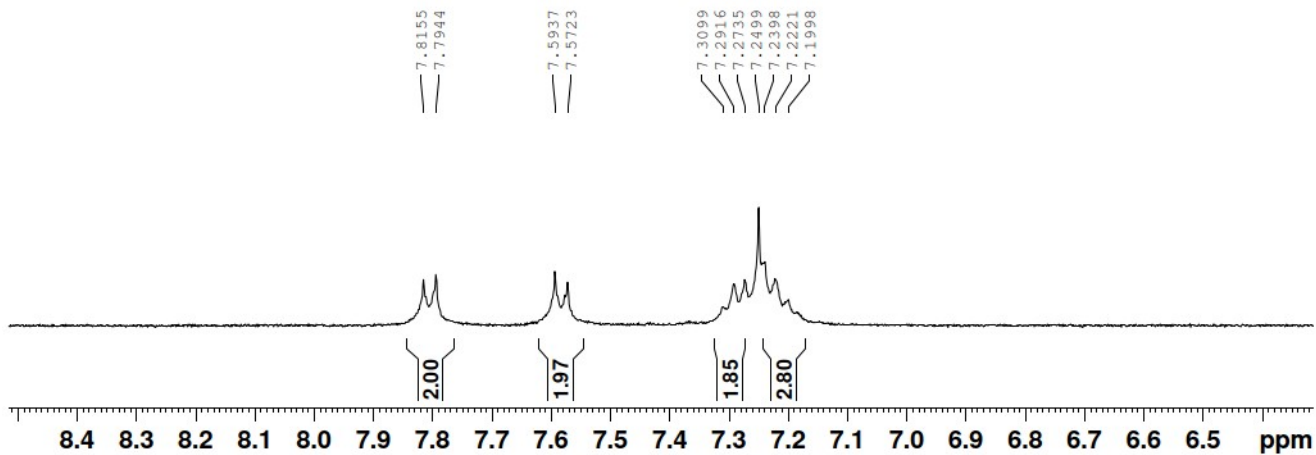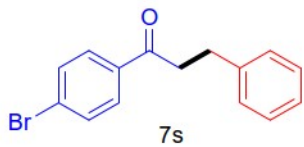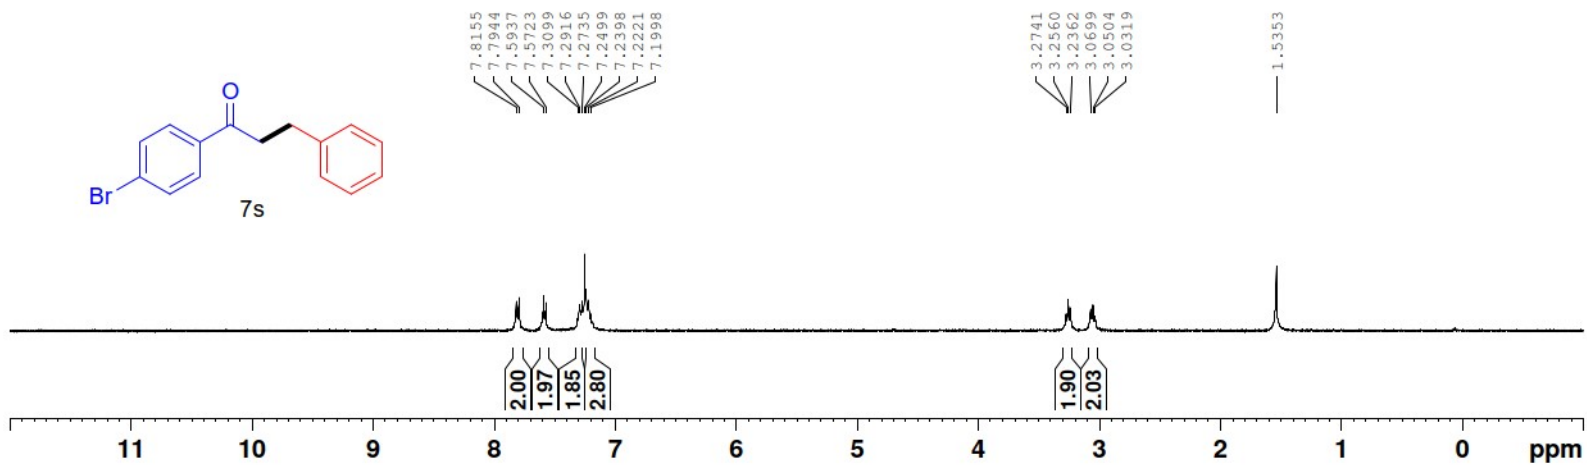

7t IN CDCl3

NAME 7t  
 EXPNO 10  
 PROCNO 1  
 Date\_ 20220217  
 Time 1.47  
 INSTRUM spect  
 PROBHD 5 mm PABBO BB-  
 PULPROG zg30  
 TD 24576  
 SOLVENT CDCl3  
 NS 8  
 DS 0  
 SWH 8012.820 Hz  
 FIDRES 0.326043 Hz  
 AQ 1.5335923 sec  
 RG 512  
 DW 62.400 usec  
 DE 6.50 usec  
 TE 298.5 K  
 DT 1.00000000 sec  
 TD0 1

===== CHANNEL f1 =====  
 NUC1 1H  
 P1 17.00 usec  
 PL1 0.00 dB  
 SFO1 400.2024714 MHz  
 SI 16384  
 SF 400.2006182 MHz  
 WDW EM  
 SSB 0  
 LB 0.30 Hz  
 GB 0  
 PC 1.00

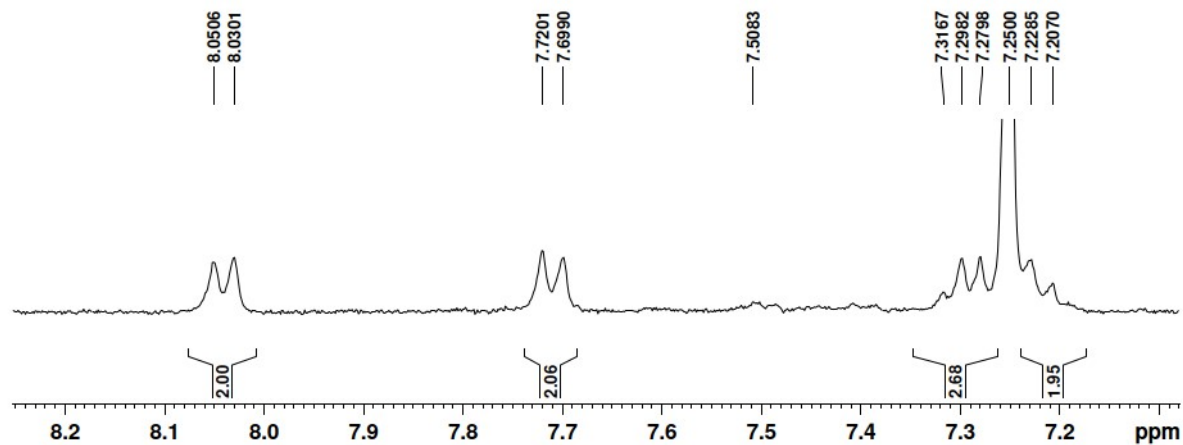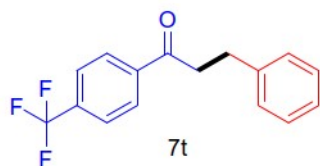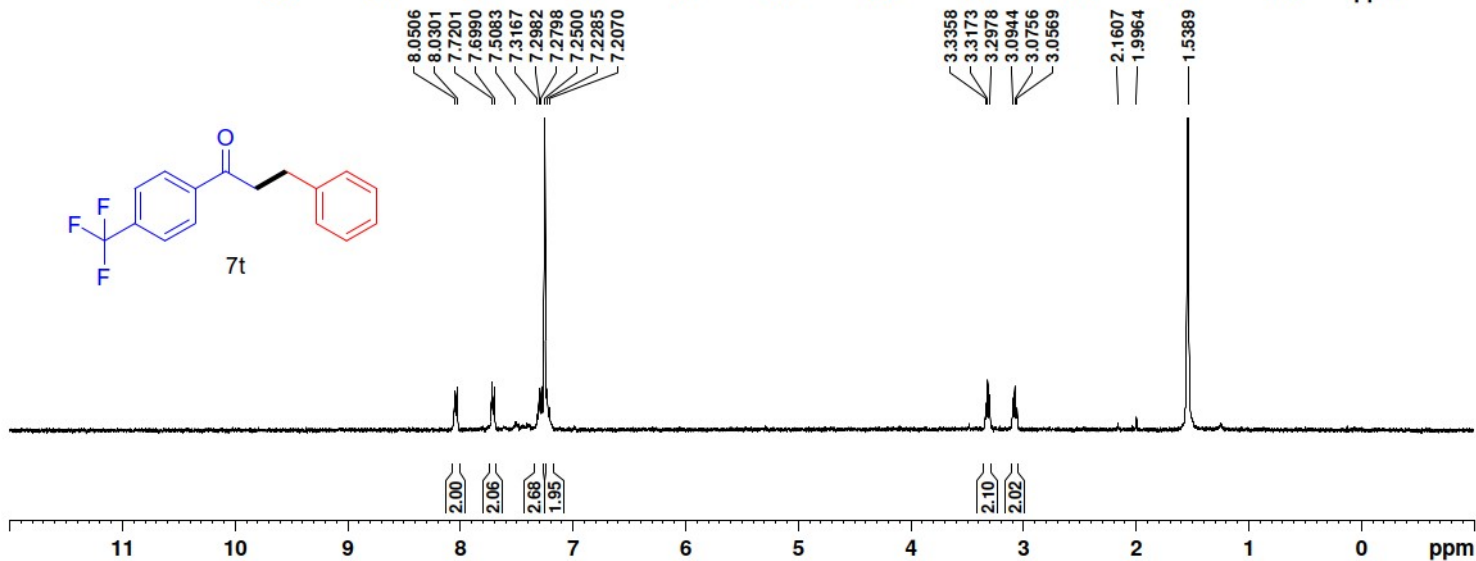

7u IN CDCl3

Current Data Parameters  
 NAME 7u  
 EXPNO 10  
 PROCNO 1

F2 - Acquisition Parameters  
 Date\_ 20220408  
 Time 23.30 h  
 INSTRUM spect  
 PROBRD 28246\_0048 (9H)  
 PULPROG zg30  
 TD 24036  
 SOLVENT CDCl3  
 NS 8  
 DS 0  
 SWH 8012.820 Hz  
 FIDRES 0.666735 Hz  
 AQ 1.4998465 sec  
 RG 293  
 DW 62.400 usec  
 DE 6.50 usec  
 TE 300.0 K  
 D1 1.00000000 sec  
 TDO 1  
 SFO1 400.1024006 MHz  
 NUC1 1H  
 PO 6.00 usec  
 P1 18.00 usec  
 PLW1 10.00000000 W

F2 - Processing parameters  
 SI 16384  
 SF 400.1000138 MHz  
 WMW 2M  
 SSB 0  
 LB 0 Hz  
 GB 0  
 PC 1.00

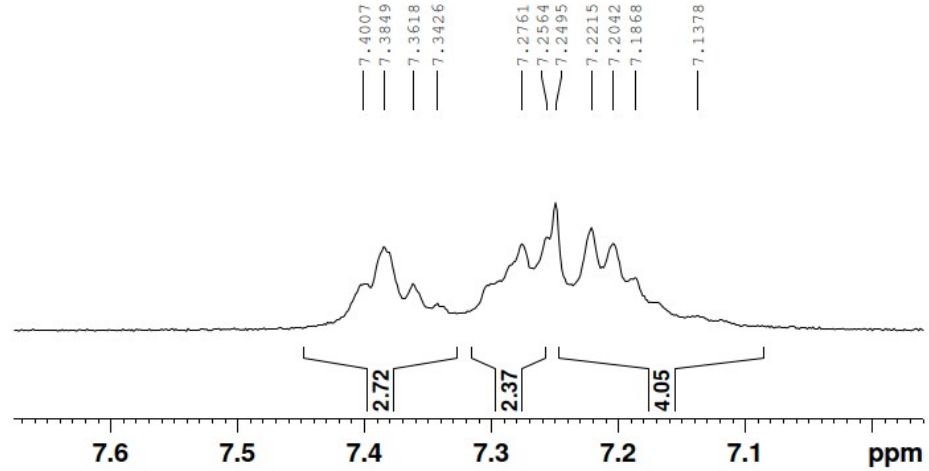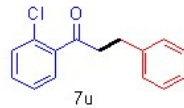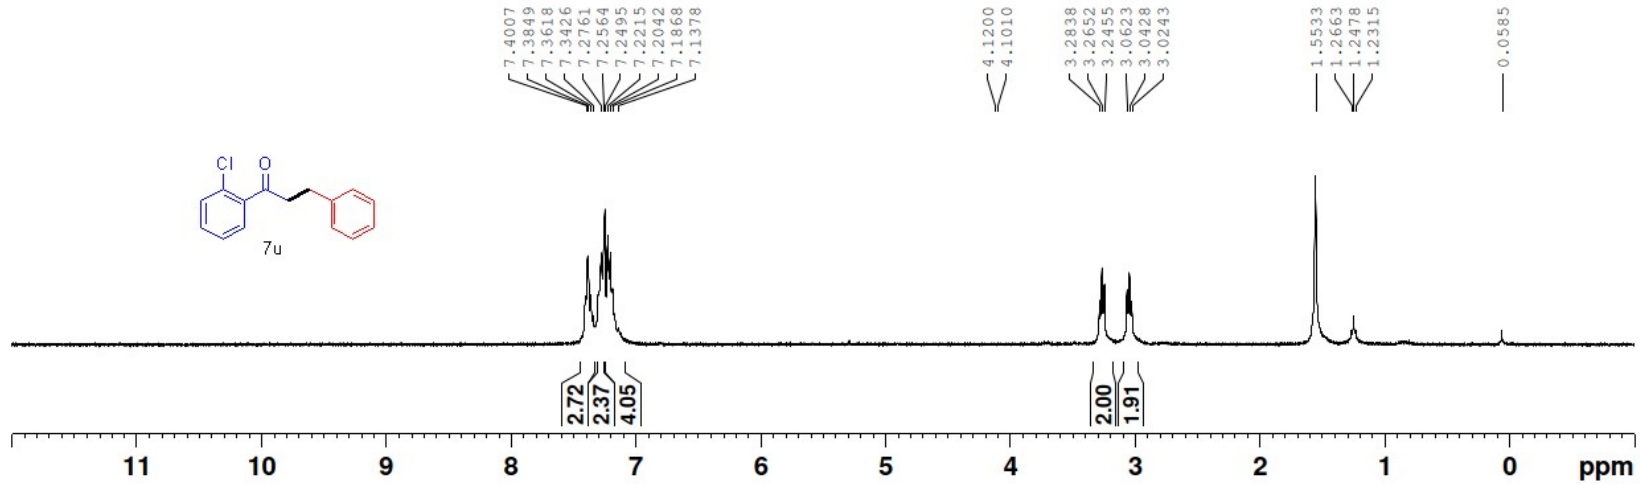

7v IN CDCl3

```

Current Data Parameters
NAME      7v
EXPNO    10
PROCNO   1

F2 - Acquisition Parameters
Date_    20220326
Time     17.02
INSTRUM  spect
PROBHD   5 mm PABBO BB-
PULPROG  zg30
TD       24036
SOLVENT  CDCl3
NS       0
DS       0
SWH      12019.230 Hz
FIDRES   0.300051 Hz
AQ       0.9998976 sec
RG       287
DW       41.600 usec
DE       6.50 usec
TE       673.2 K
D1       1.00000000 sec
TD0      1

----- CHANNEL f1 -----
NUC1     1H
P1       17.00 usec
PL1     0 dB
SFO1    400.2024714 MHz

F2 - Processing parameters
SI       16384
SF       400.2000187 MHz
WDW      EM
SSB      0
LB       0.30 Hz
GB       0
PC       1.00
    
```

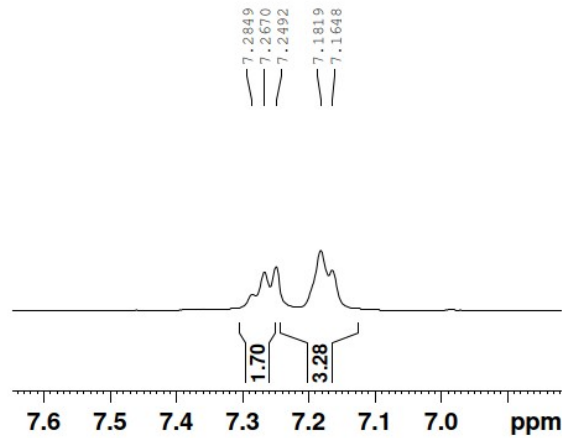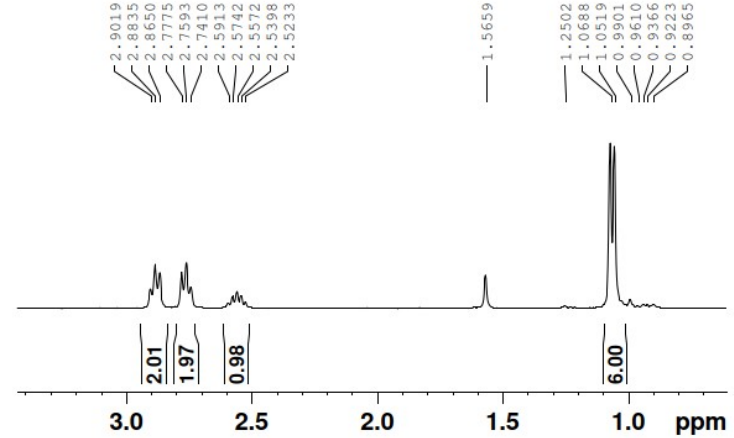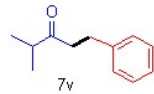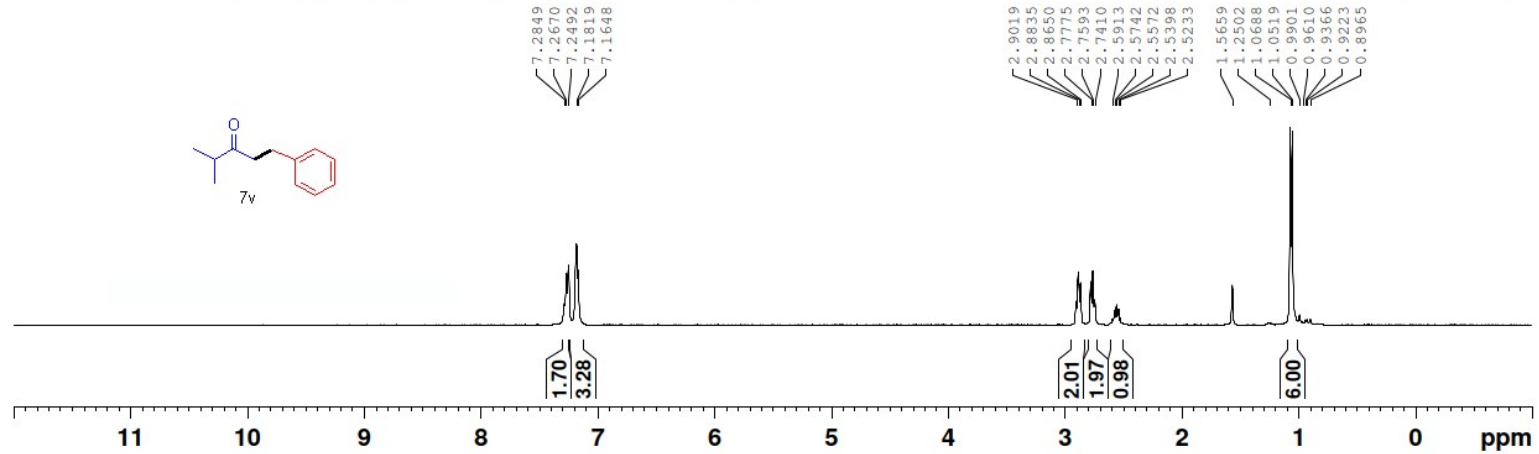

7w IN CDC13

Current Data Parameters  
NAME 7w  
EXPNO 10  
PROCNO 1  
F2 - Acquisition Parameters  
Date\_ 20220325  
Time 23.32 h  
INSTRUM spect  
PROCNO 18246.0048 (PR  
FOLPROG 8020  
TD 24036  
SOLVENT CDC13  
SI 0  
SF 8012.820 Hz  
FIDRES 0.664735 Hz  
AQ 1.4998461 sec  
RG 203  
SW 62.400 usac  
DE 6.50 usac  
TE 300.0 K  
SI 1.00000000 sec  
RO 1  
SFO1 400.1024006 MHz  
HSC1 1K  
P0 6.00 usac  
P1 18.00 usac  
P1M1 10.00000000 W  
F2 - Processing parameters  
SI 14394  
SF 400.1005134 MHz  
WDW EM  
SSB 0  
LB 0 Hz  
GB 0  
PC 1.00

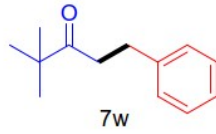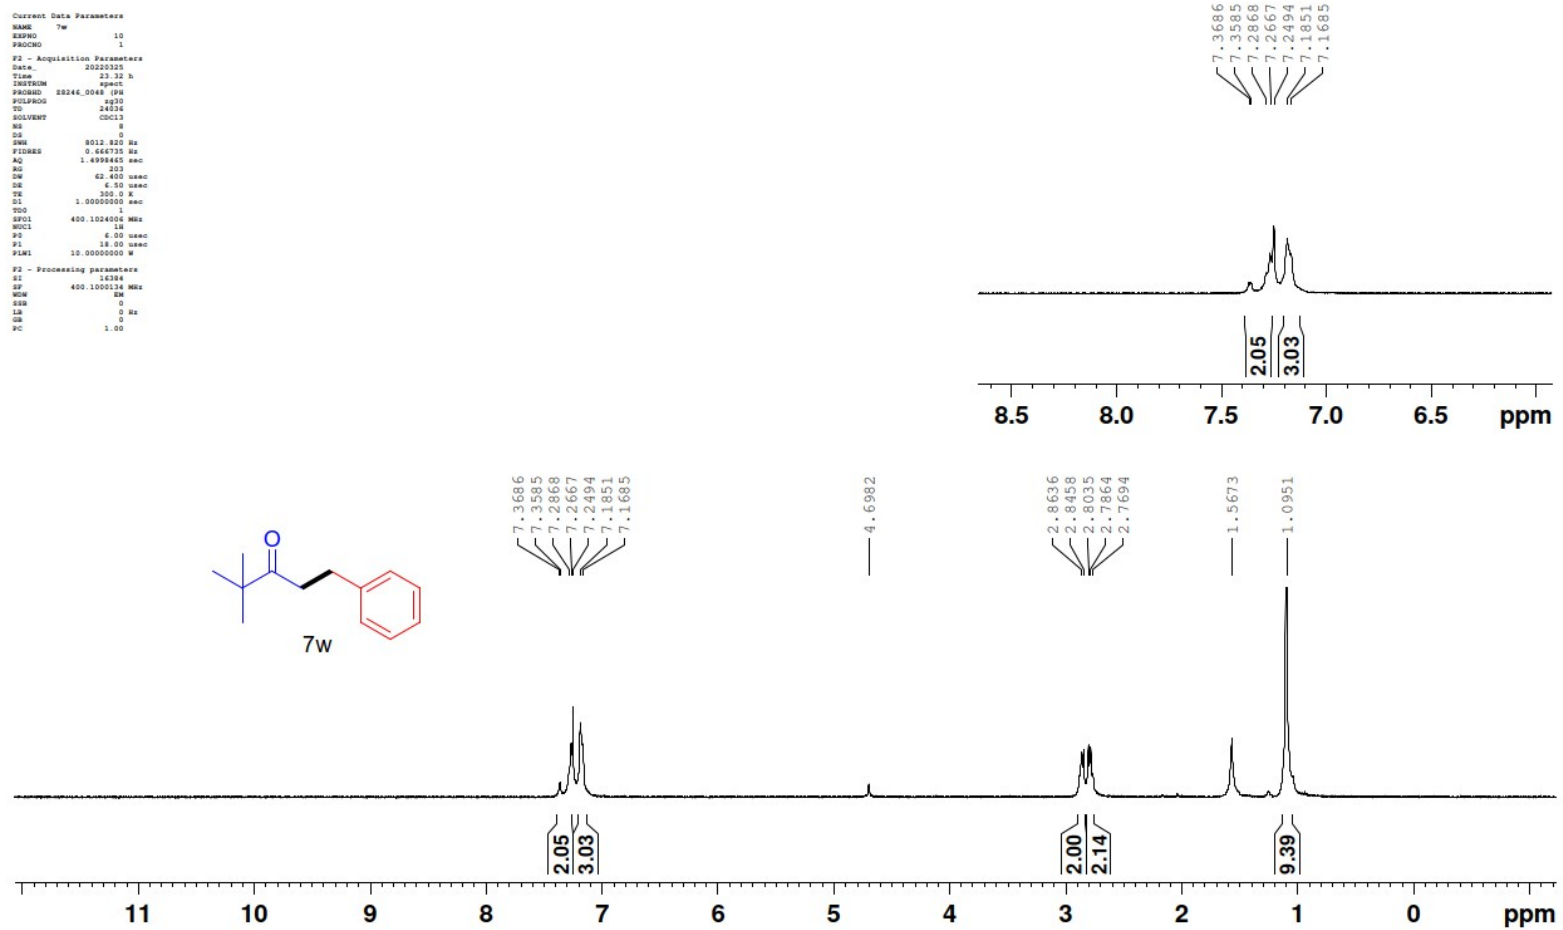

7x IN DMSO

Current Data Parameters  
 NAME 7x  
 EXPNO 10  
 PROCNO 1  
 F2 - Acquisition Parameters  
 Date\_ 20230505  
 Time 23.24 h  
 INSTRUM Avance  
 PROBRD B163739\_0713 ( f  
 PULPROG zg30  
 TD 24576  
 SOLVENT DMSO  
 NS 8  
 DS 0  
 SFR 8196.721 Hz  
 FIDRES 0.647051 Hz  
 AQ 1.4993360 sec  
 RG 101  
 CW 61.000 usec  
 DE 13.80 usec  
 TE 298.2 K  
 SI 0 sec  
 TDO 1  
 SFO1 400.6024737 MHz  
 NUC1 1H  
 P0 2.67 usec  
 P1 8.00 usec  
 P1A1 24.03499885 W  
 F2 - Processing parameters  
 SI 6536  
 SF 400.6000462 MHz  
 NH 8  
 SH 0  
 GB 0.30 Hz  
 GR 0  
 PC 1.00

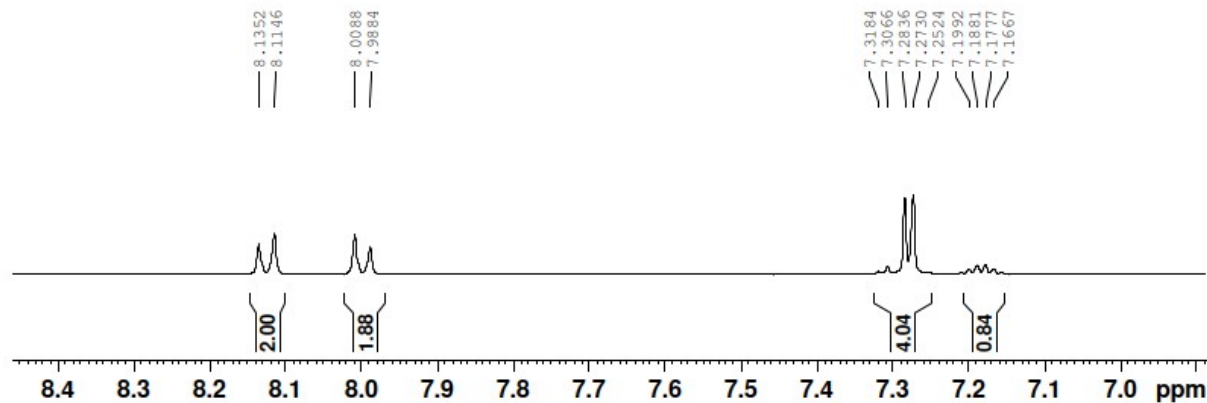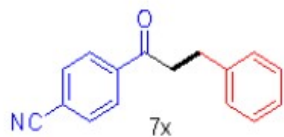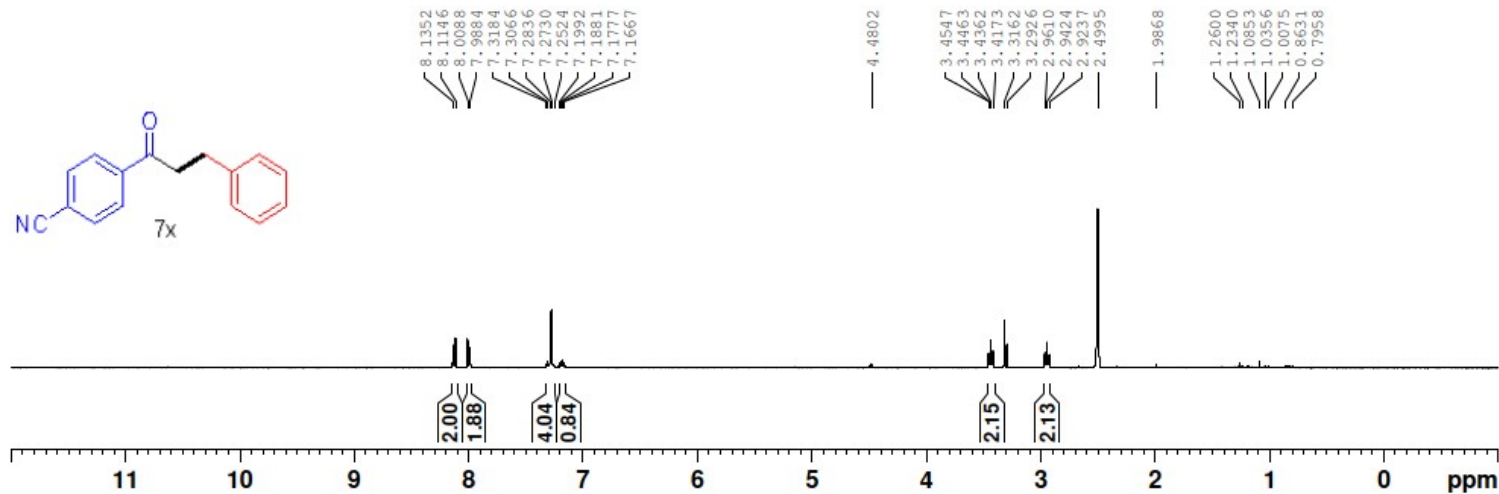

Analyst  
Date  
Md Bakibillah  
08 May 2023 17:01

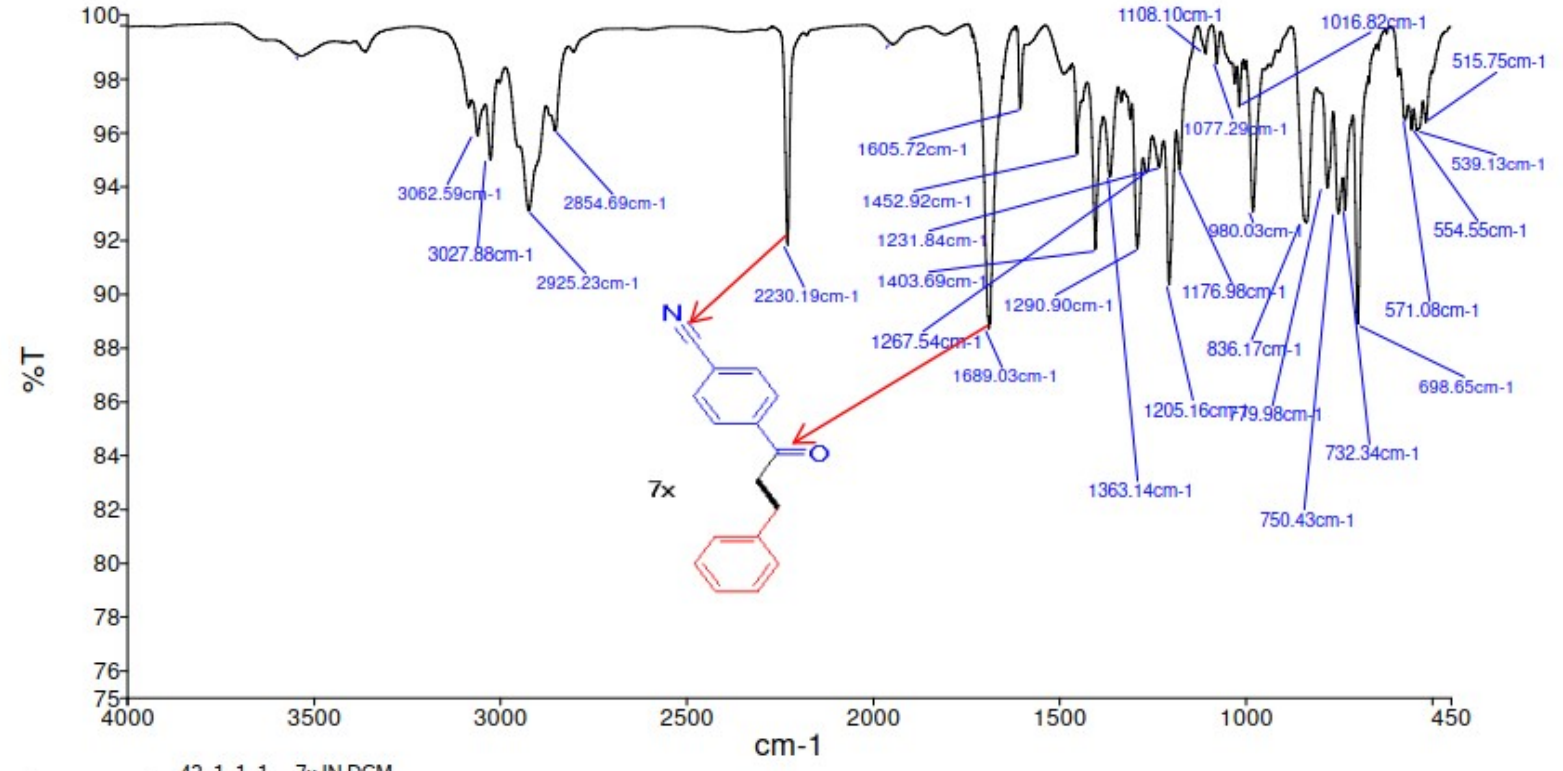

7y IN DMSO

Current Data Parameters  
 NAME 7y  
 EXPNO 10  
 PROCNO 1  
 F2 - Acquisition Parameters  
 Date\_ 20230506  
 Time 12.40 h  
 INSTRUM Avance  
 PROBRD B163739\_0713 (   
 PULPROG zg30  
 TD 24576  
 SOLVENT DMSO  
 NS 8  
 DS 0  
 SWH 8196.721 Hz  
 FIDRES 0.647051 Hz  
 AQ 1.4993360 sec  
 RG 101  
 CW 61.000 usec  
 DE 13.80 usec  
 TE 298.2 K  
 SI 1.00000000 sec  
 TQ 1  
 SFO1 400.6024737 MHz  
 NUC1 1H  
 PG 2.67 usec  
 PI 9.00 usec  
 P181 24.03499880 sec  
 F2 - Processing parameters  
 SI 6536  
 SF 400.6000042 MHz  
 WDW EM  
 SSB 0  
 LB 0.30 Hz  
 GB 0  
 PC 1.00

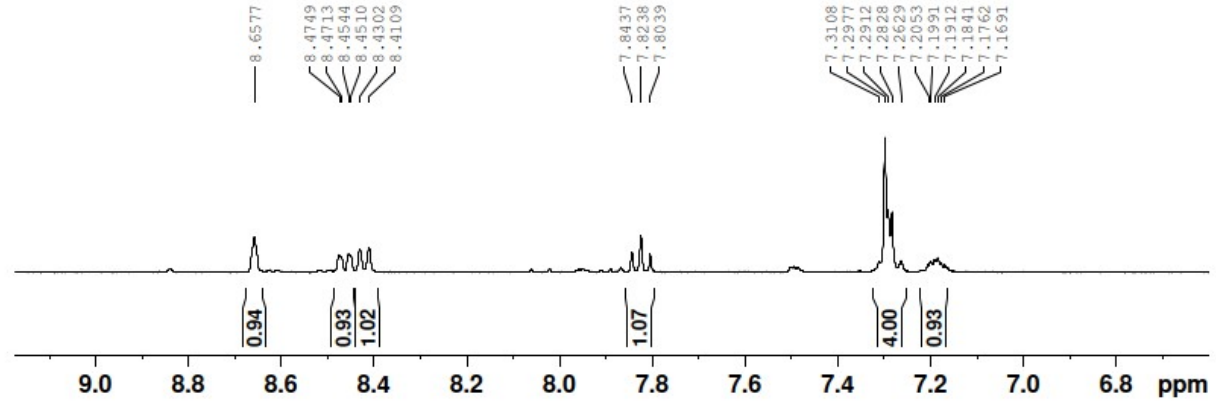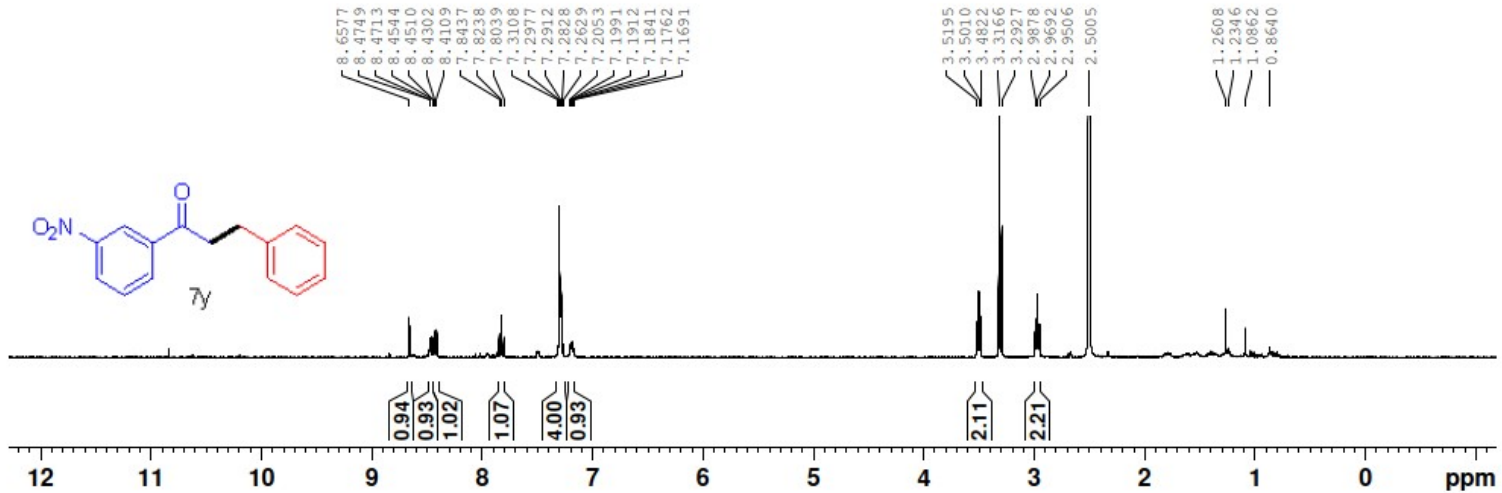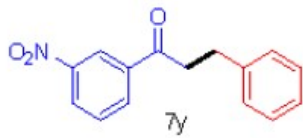



7y IN CDCl3

Current Data Parameters  
 NAME 7y  
 EXPNO 10  
 PROCNO 1  
 F2 - Acquisition Parameters  
 Date\_ 20230512  
 Time 0.49 h  
 INSTRUM Avance  
 PROBRID z163739.0713 (z  
 PULPROG zg30  
 TD 24576  
 SOLVENT CDCl3  
 NS 8  
 DS 0  
 SWS 8196.721 Hz  
 FIDRES 0.667051 Hz  
 AQ 1.4991360 sec  
 RG 101  
 CW 61.000 usec  
 DE 13.89 usec  
 TE 298.6 K  
 D1 1.00000000 sec  
 TEO 1  
 SFO1 400.6024737 MHz  
 NUC1 13  
 P2 2.87 usec  
 P1 8.00 usec  
 FLM1 24.03499985 W  
 F2 - Processing parameters  
 SI 65536  
 SF 400.6000144 MHz  
 SCW 8M  
 SGB 0  
 LB 0.30 Hz  
 GB 0  
 PC 1.00

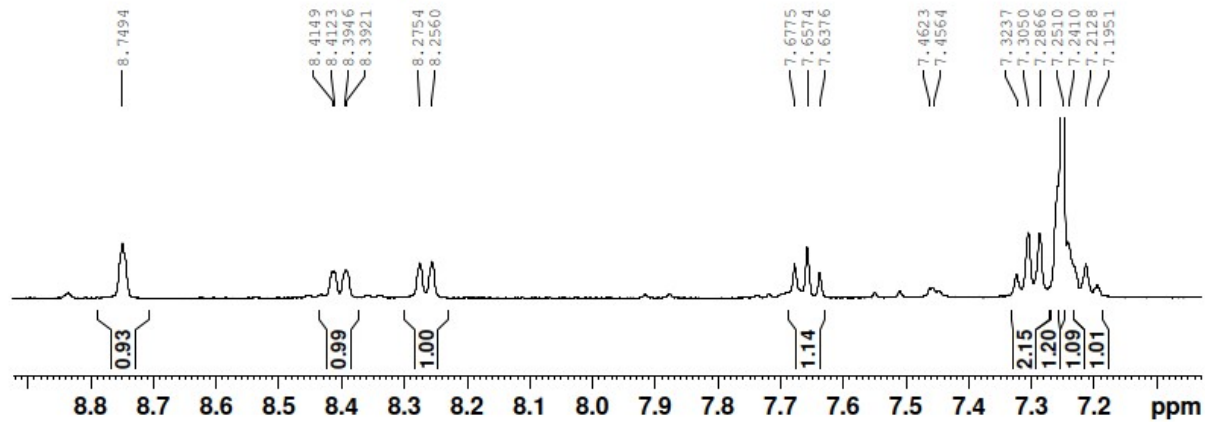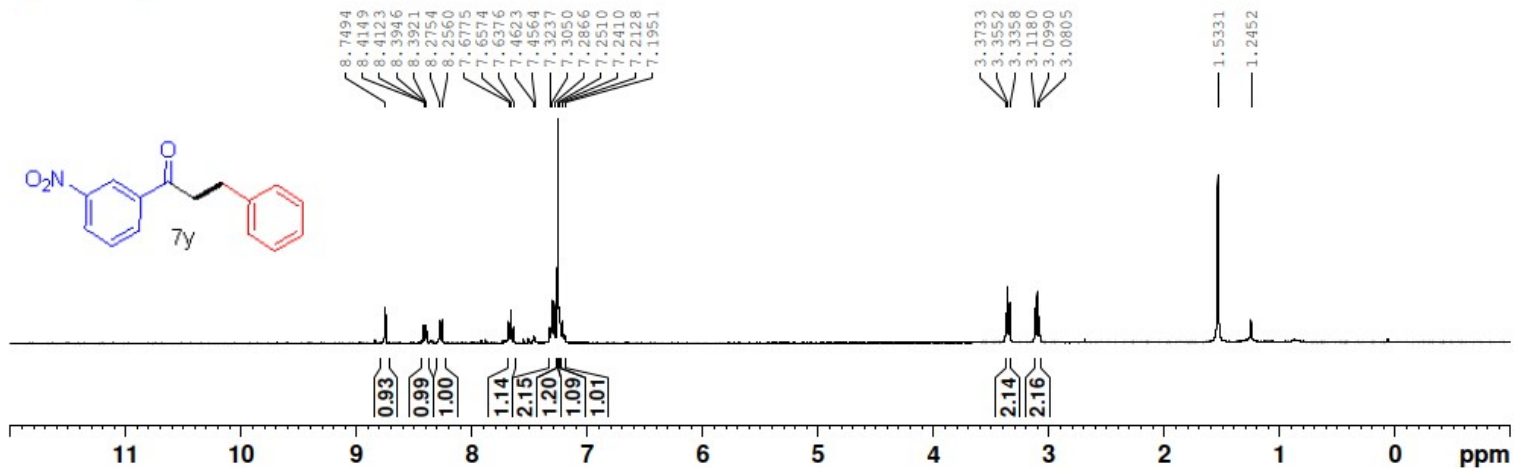

7z IN DMSO

Current Data Parameters  
 NAME 7z  
 EXPNO 10  
 PROCNO 1  
 F2 - Acquisition Parameters  
 Date\_ 20230504  
 Time 18.55 h  
 INSTRUM Avance  
 PROBRD B163739\_0713 ( f  
 PULPROG zg30  
 TD 24576  
 SOLVENT DMSO  
 NS 8  
 DS 0  
 SFR 8196.721 Hz  
 FIDRES 0.647051 Hz  
 AQ 1.4991360 sec  
 RG 101  
 CW 61.000 usec  
 DE 13.50 usec  
 TE 298.1 K  
 SI 1.00000000 sec  
 TDO 1  
 SFO1 400.6024737 MHz  
 NUC1 1H  
 PG 2.67 usec  
 PI 0.00 usec  
 P181 24.03499982 W  
 F2 - Processing parameters  
 SI 6536  
 SF 400.600042 MHz  
 WDW EM  
 SSB 0  
 LB 0.30 Hz  
 GB 0  
 PC 1.00

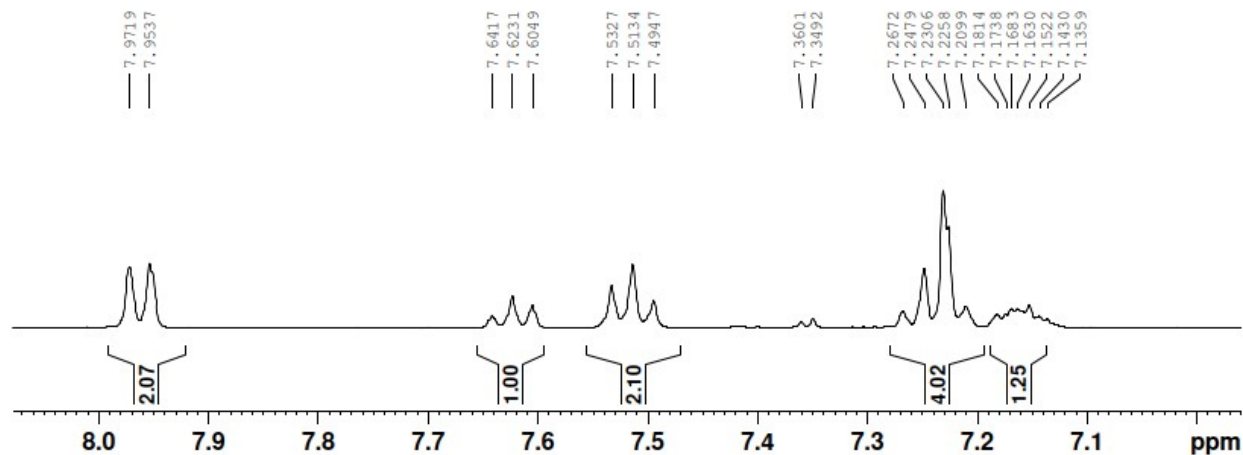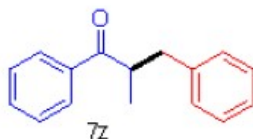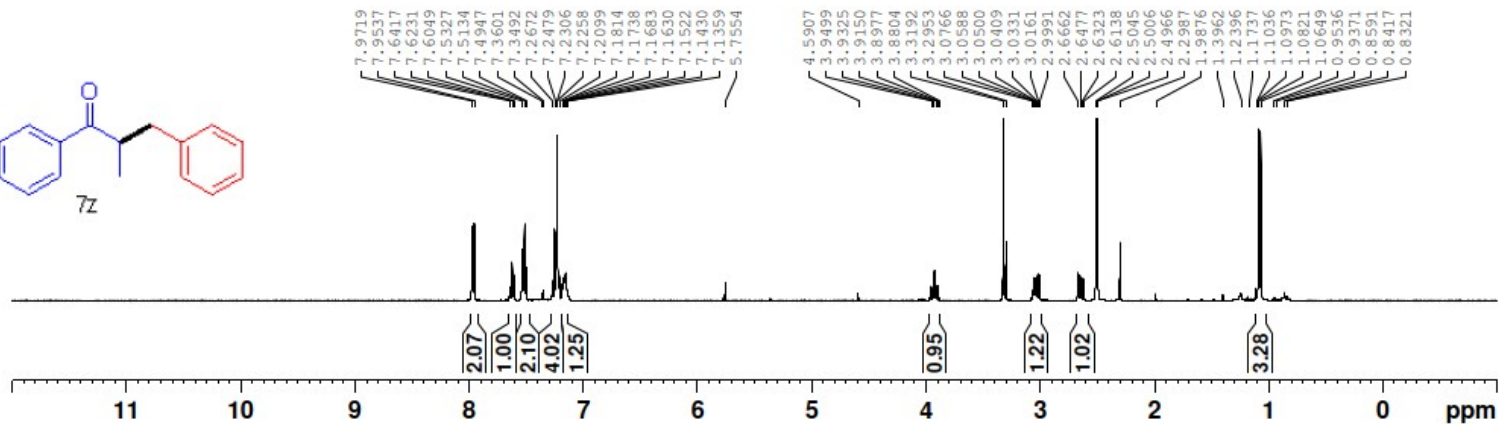

Current Data Parameters  
 NAME 7z  
 EXPR0 10  
 PROCNO 1

F2 - Acquisition Parameters  
 Date\_ 20230505  
 Time 8.09 h  
 INSTRUM Avance  
 PROBR0 0163739\_0713 (f  
 PULPROG zg30  
 TD 24576  
 SOLVENT MeOD  
 NS 8  
 DS 0  
 SWH 8196.721 Hz  
 FIDRES 0.647051 Hz  
 AQ 1.4993160 sec  
 RG 101  
 CW 41.000 usec  
 DE 13.80 usec  
 TE 298.2 K  
 SI 1.00000000 sec  
 TDO 1  
 SFO1 400.6024737 MHz  
 NUC1 1H  
 PG 2.67 usec  
 P1 8.00 usec  
 PL1 24.0349988 W

F2 - Processing parameters  
 SI 6536  
 SF 400.6000124 MHz  
 NH 1  
 SW 8K  
 SSB 0  
 LB 0.30 Hz  
 GB 0  
 PC 1.00

7z IN MeOD

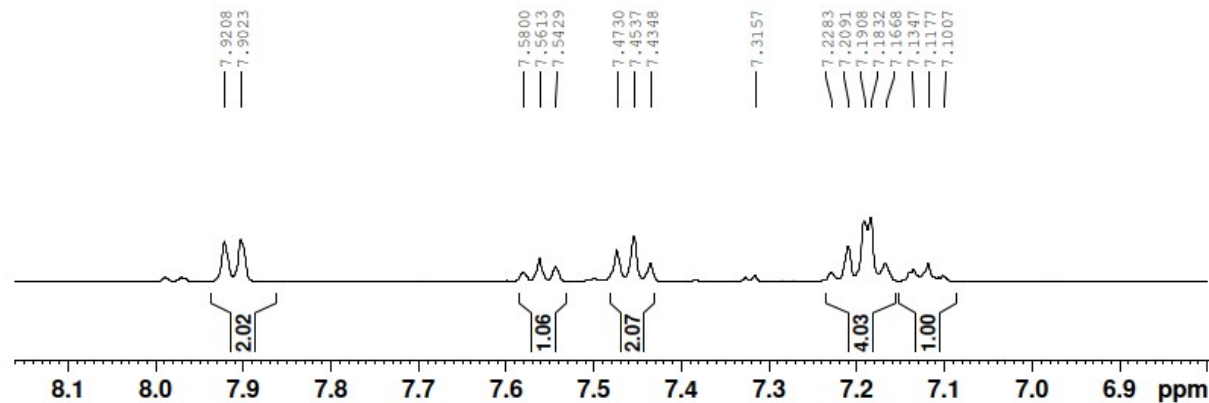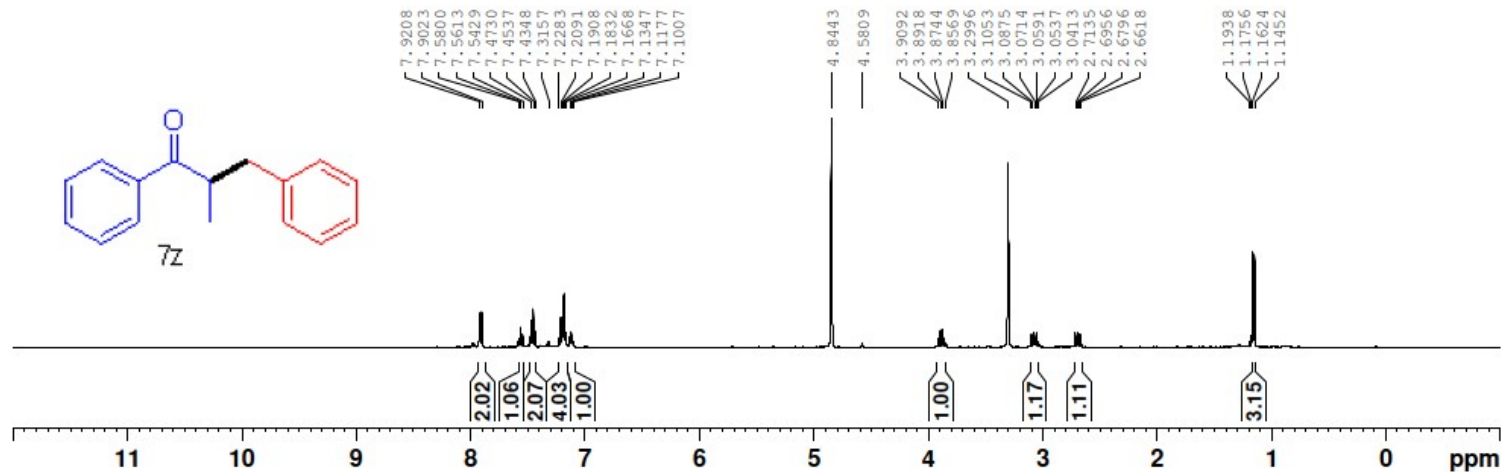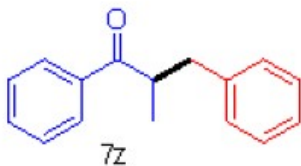

7za IN DMSO

Current Data Parameters  
NAME 7za  
EXPRO 10  
PROCNO 1

F2 - Acquisition Parameters  
Date\_ 20230504  
Time 18.53 h  
INSTRUM Avance  
PROBHD BBO13739\_0713 (1  
PULPROG zgpg30  
TD 24576  
SOLVENT DMSO  
NS 8  
DS 0  
SWH 8196.721 Hz  
FIDRES 0.647051 Hz  
AQ 1.4993360 sec  
RG 101  
CW 61.000 usec  
DE 13.50 usec  
TE 298.1 K  
SI 1.00000000 sec  
TDO 1  
SFO1 400.6024737 MHz  
NUC1 1H  
PC 2.67 usec  
PI 9.00 usec  
PL1 24.03499885 W

F2 - Processing parameters  
SI 6536  
SF 400.600042 MHz  
WDW EM  
SSB 0  
LB 0.30 Hz  
GB 0  
PC 1.00

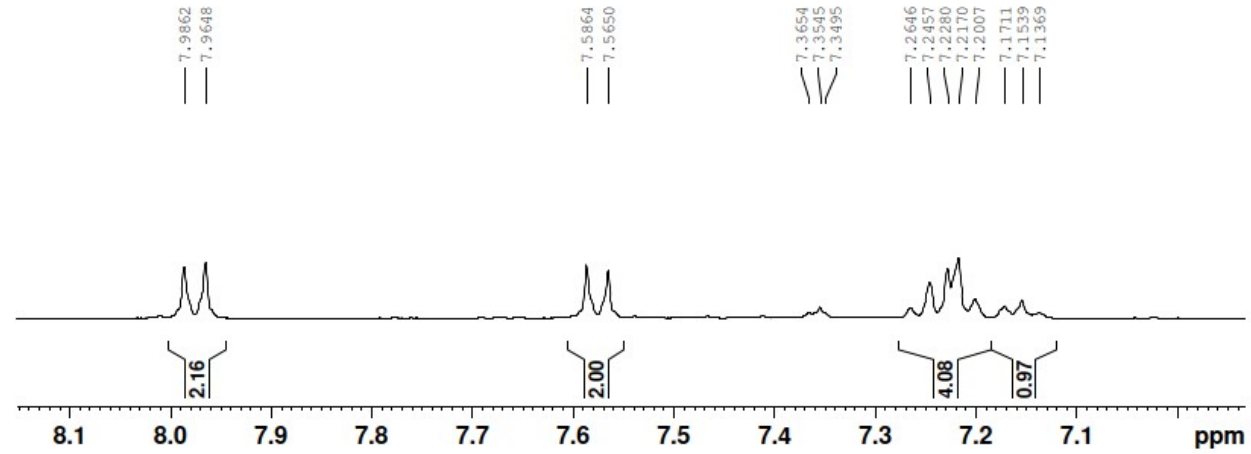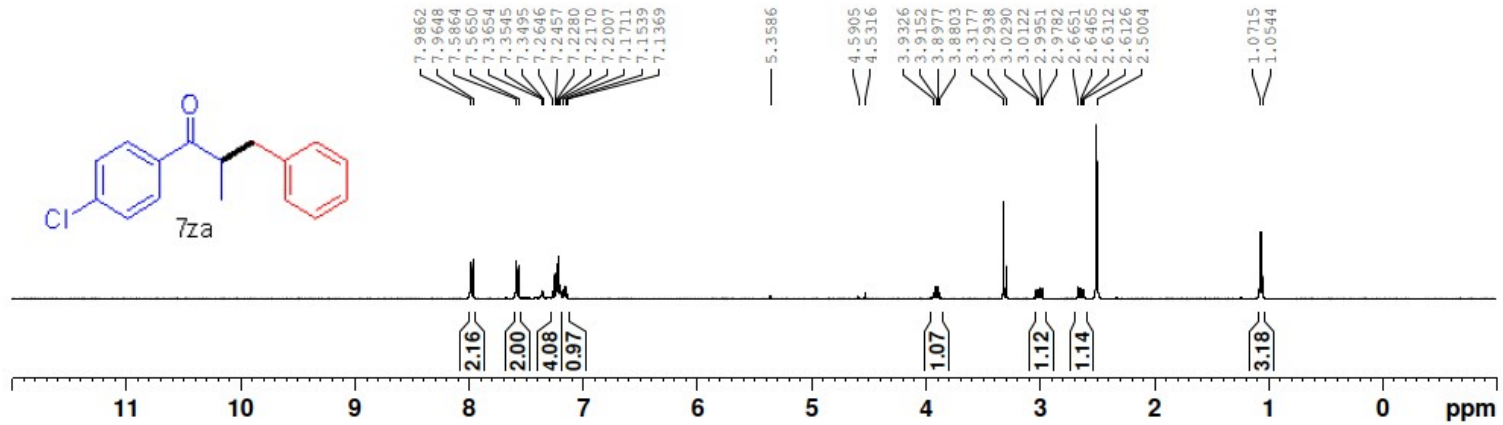

8a IN CDCl3

Current Data Parameters  
 NAME 8a  
 EXPNO 10  
 PROCNO 1  
 F2 - Acquisition Parameters  
 Date\_ 20220203  
 Time 19.24 h  
 INSTRUM spect  
 PROBNM Z8246\_0048 (PR  
 FULPROG zg30  
 TD 24036  
 SOLVENT CDCl3  
 NS 8  
 DS 0  
 SWE 8012.820 Hz  
 FIDRES 0.666735 Hz  
 AQ 1.4998465 sec  
 RG 16  
 SW 62.400 usec  
 DE 8.50 usec  
 TE 300.0 K  
 D1 0 sec  
 TDD 1  
 SFO1 400.1024056 MHz  
 NUC1 1H  
 PD 6.00 usec  
 PL 18.00 usec  
 P1M1 10.00000000 w  
 F1 - Processing parameters  
 SI 16384  
 SF 400.1000136 MHz  
 WMW SW  
 SSB 0  
 LB 0 Hz  
 GB 0  
 PC 1.00

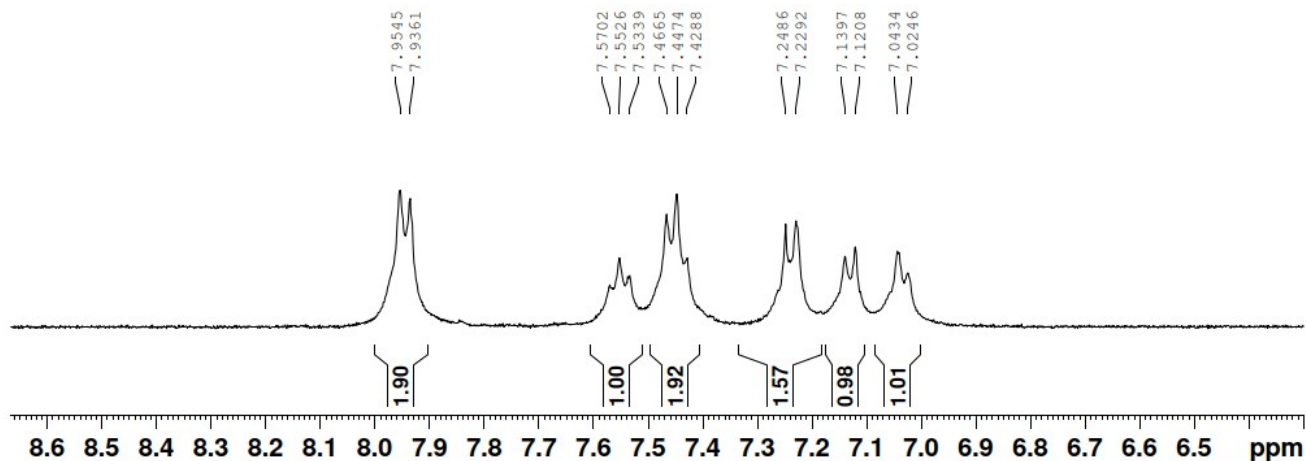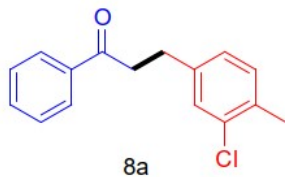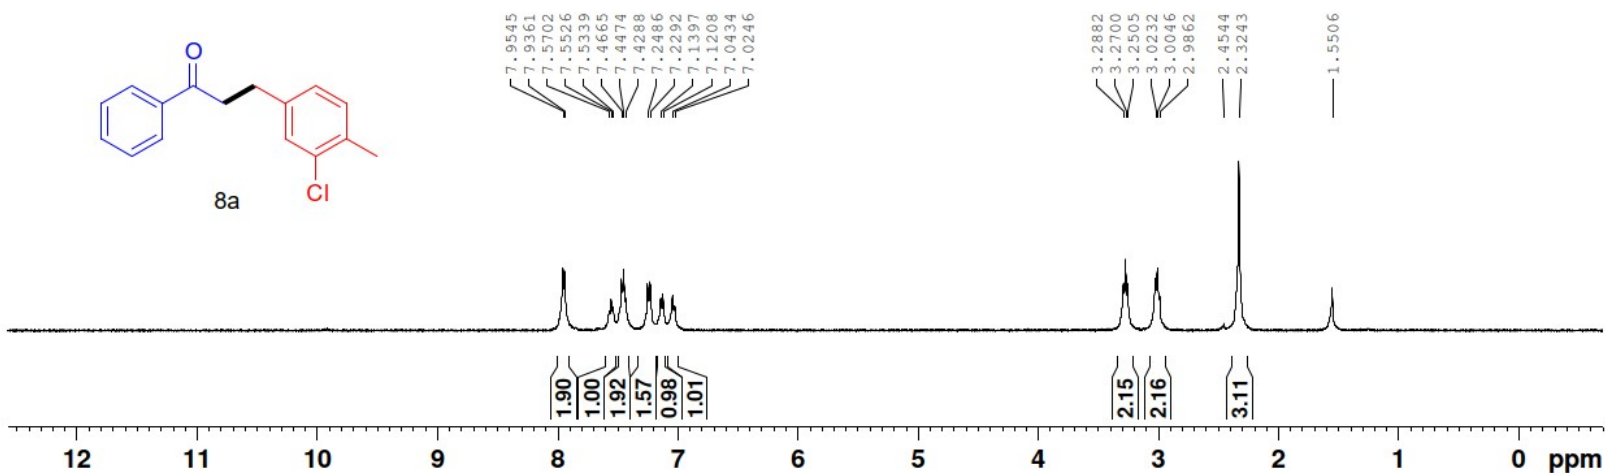

8a IN CDCl3-13C

```

Current Data Parameters
NAME: 8a
EXPNO: 40
PROCNO: 1

F2 - Acquisition Parameters
Date_: 20230229
Time: 3.22 h
INSTRUM: spect
PROBHD: zgpg30z
PULPROG: zgpg30
TD: 65536
SOLVENT: CDCl3
NS: 1500
DS: 4
SWH: 20800.024 Hz
FIDRES: 0.726609 Hz
AQ: 1.3762580 sec
RG: 101
DE: 4.50 umm
TE: 298.2 K
D1: 2.0380000 sec
d11: 2.0380000 sec
TDS: 1
SFO1: 100.626125 MHz
NUC1: 13C
PC: 2.47 umm
P1: 8.00 umm
PLM1: 98.0793807 W
SFO2: 625.6216524 MHz
NUC2: 1H
CPDPRG2: waltz16
PCPD2: 90.00 umm
PLM2: 24.0369980 W
PLM12: 0.18273070 W
PLM13: 0.09136640 W

F2 - Processing parameters
SI: 32768
SF: 100.626125 MHz
WDW: EM
SSB: 0
LB: 1.00 Hz
GB: 0
PC: 1.40
    
```

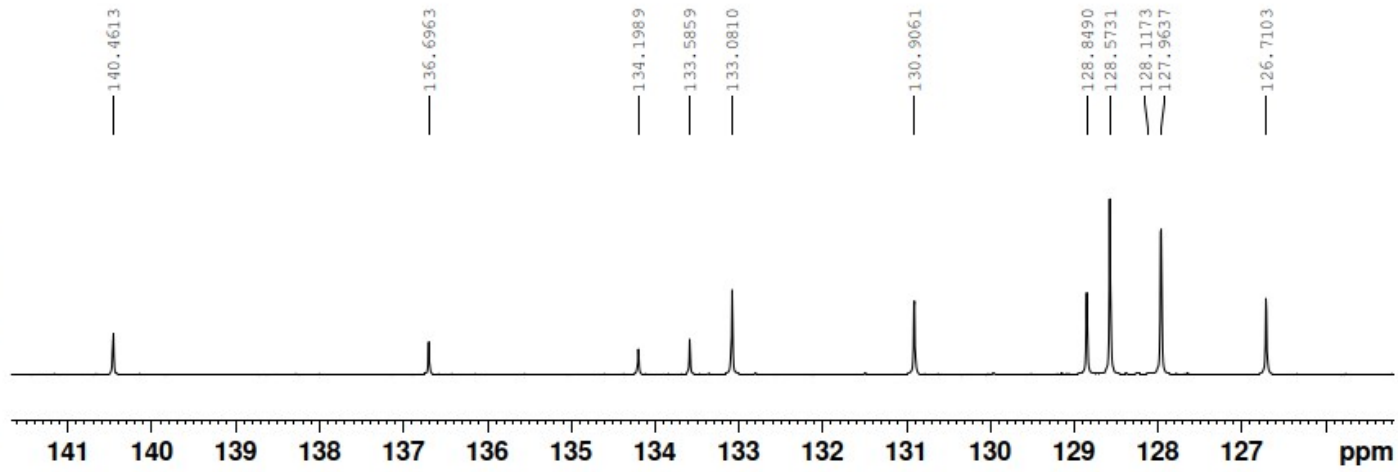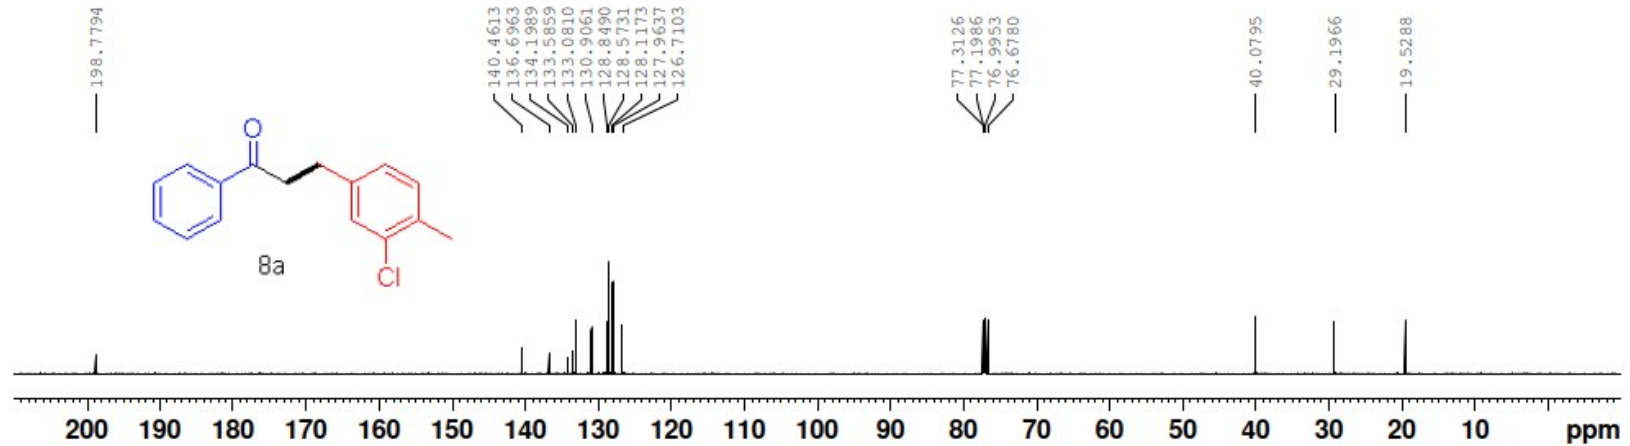

8a IN CDCl3-APT

Current Data Parameters  
 NAME 8a  
 EXPNO 1  
 PROCNO 1  
 F2 - Acquisition Parameters  
 Date\_ 20220923  
 Time 4.48 h  
 INSTRUM Bruker  
 PULPROG zgpg30  
 TO 433.64  
 SOLVENT CDCl3  
 NS 1300  
 DS 4  
 SWH 20860.524 Hz  
 FREQ0 125.760384 MHz  
 AQ 1.3762360 sec  
 RG 320  
 DW 21.000 usec  
 DE 6.00 usec  
 TE 298.2 K  
 CMT02 143.0000000  
 CMT01 1.0000000  
 D1 2.0000000 sec  
 D15 0.0000000 sec  
 TD 1  
 SFO1 100.6261212 MHz  
 WDC1 13C  
 P1 8.00 usec  
 PL1 14.00 usec  
 PLW1 95.0000000 W  
 SFO2 400.1418750 MHz  
 WDC2 1H  
 CPDPRG2 waltz16  
 PCPD2 90.00 usec  
 PLW2 24.0000000 W  
 PLW12 0.1427370 W  
 F2 - Processing parameters  
 SI 32768  
 SF 100.6261212 MHz  
 NS 1300  
 SSB 0  
 LB 1.00 Hz  
 GB 0  
 PC 1.40

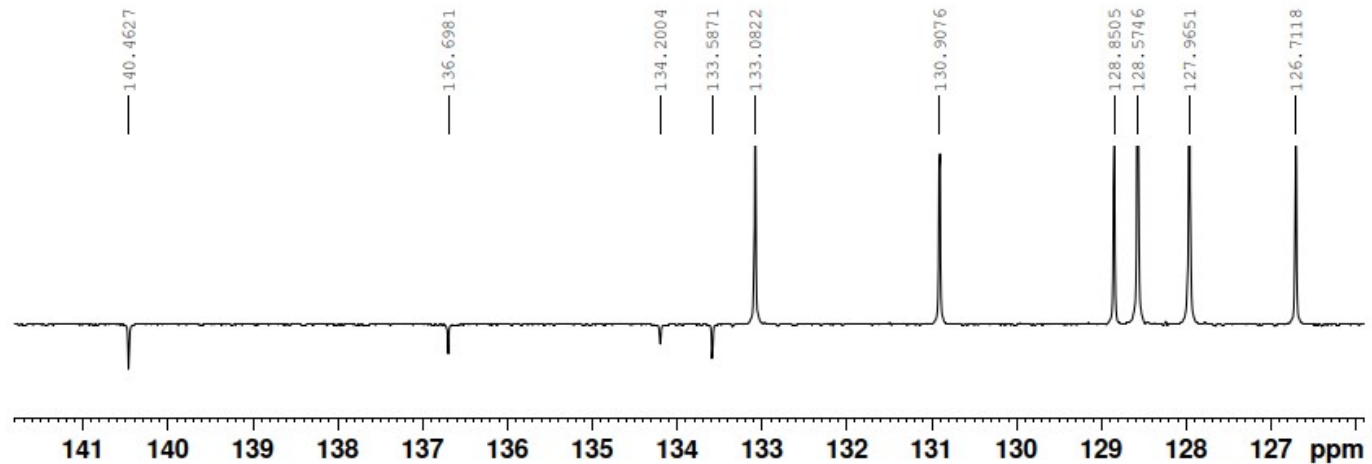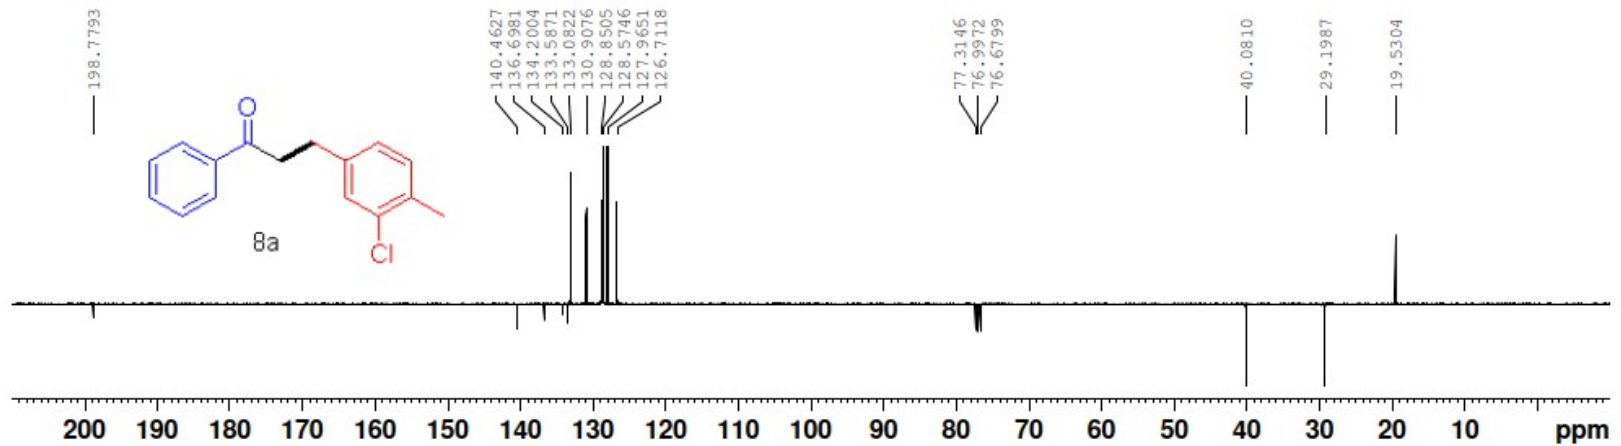

8b IN CDCl3

```

NAME 8b
EXPNO 10
PROCNO 1
Date_ 20220103
Time 12.14
INSTRUM spect
PROBHD 5 mm PABBO BB-
PULPROG zg30
TD 24576
SOLVENT s CDCl3
NS 8
DS 0
SWH 8012.820 Hz
FIDRES 0.326043 Hz
AQ 1.5335923 sec
RG 80.5
DW 62.400 usec
DE 6.50 usec
TE 273.2 K
D1 1.00000000 sec
TDO 1

===== CHANNEL f1 =====
NUC1 1H
P1 17.00 usec
PL1 0.00 dB
SFO1 400.2004714 MHz
SI 16384
SF 400.2000179 MHz
WDW EM
SSB 0
LB 0.30 Hz
GB 0
PC 1.00
    
```

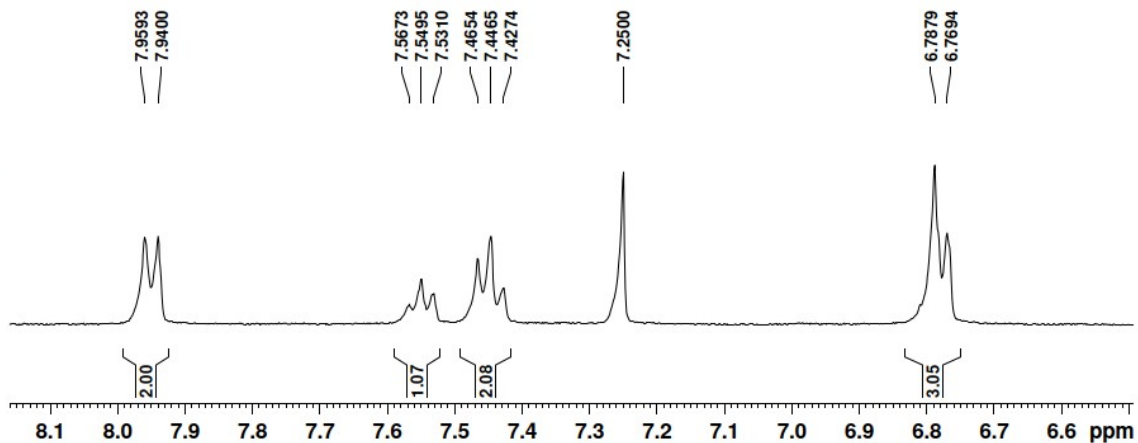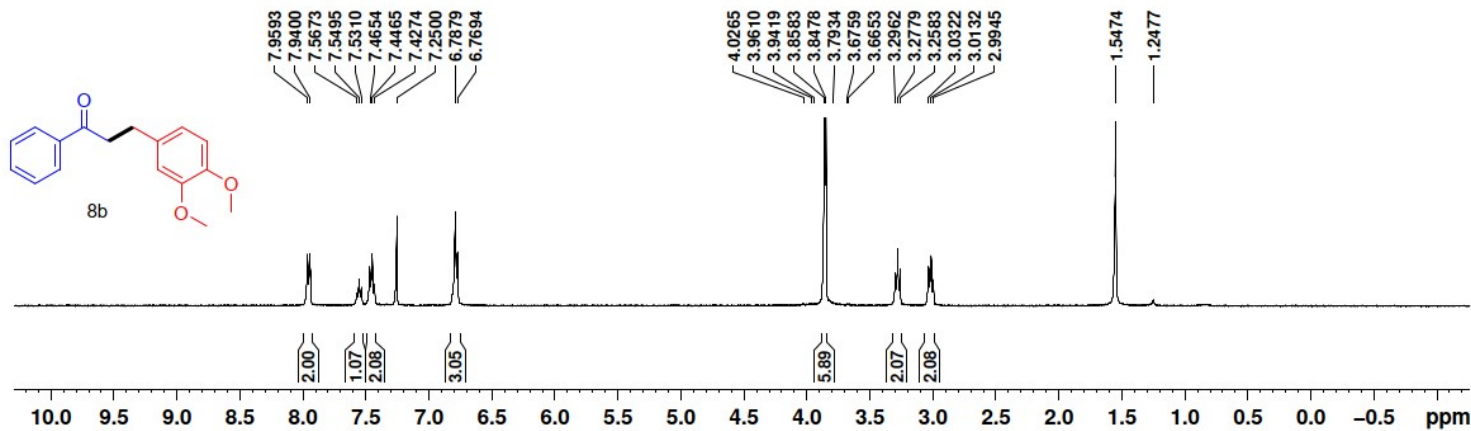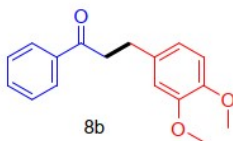



8c IN CDCl3

NAME 8c  
 EXPNO 10  
 PROCNO 1  
 Date\_ 20220214  
 Time\_ 20:39  
 INSTRUM spect  
 PROBHD 5 mm PABBO BB-  
 PULPROG zg30  
 TD 24576  
 SOLVENT CDCl3  
 NS 8  
 DS 8  
 SWH 8012.820 Hz  
 FIDRES 0.326043 Hz  
 AQ 1.5335923 sec  
 RG 322  
 DW 62.400 usec  
 DE 6.50 usec  
 TE 298.9 K  
 DT 1.00000000 sec  
 TDO 1

===== CHANNEL f1 =====  
 NUC1 1H  
 P1 17.00 usec  
 PL1 0.00 dB  
 SFO1 400.2024714 MHz  
 SI 16384  
 SF 400.2000182 MHz  
 WDW EM  
 SSB 0  
 LB 0.30 Hz  
 GB 0  
 PC 1.00

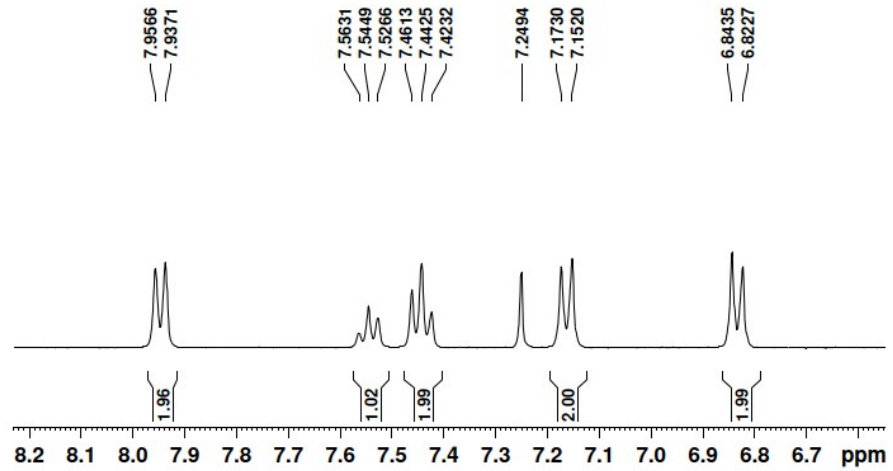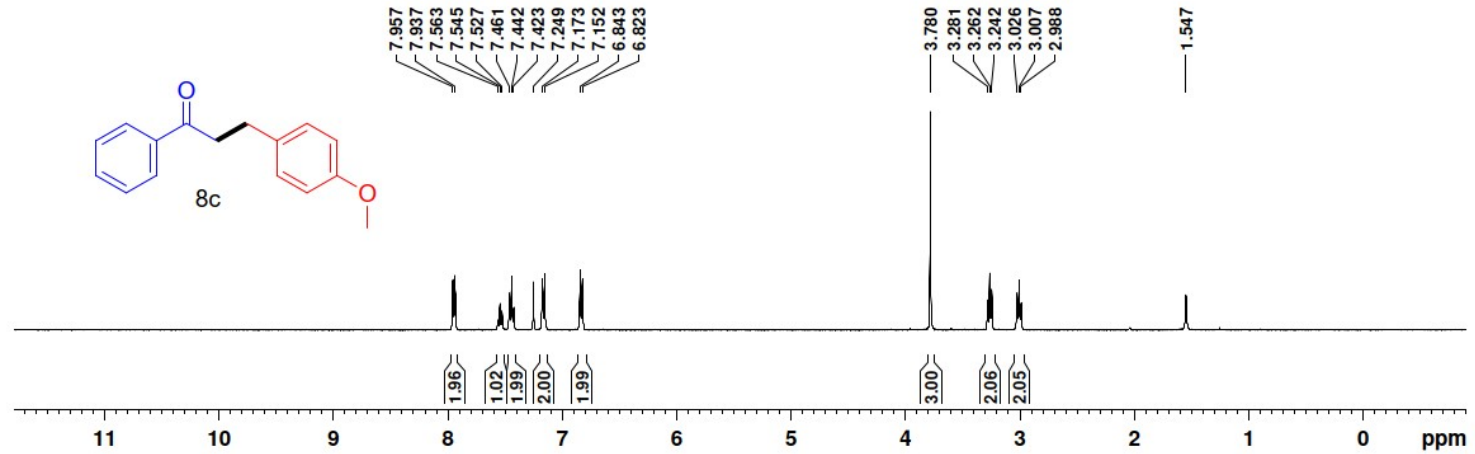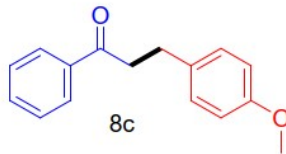

8d IN CDCl3

```

Current Data Parameters
NAME      8d
EXPNO    10
PROCNO    1

F2 - Acquisition Parameters
Date_     20230314
Time      0:02 h
INSTRUM   agvt
PROBHD    zg30
PULPROG   zg30
TD        65536
SOLVENT   CDCl3
NS        8
DS        0
SWH        8012.820 Hz
FREQZ     0.466720 Hz
AQ         1.4998485 sec
RG         28.5
DW         82.800 usec
DE         6.80 usec
TE         300.0 K
D1         0.00000000
TDS        1
SFO1      600.2326014 MHz
WDW1      HM
SSB1      0
PS         6.79 usec
PI         14.38 usec
PLW1      19.180000000 M

F2 - Processing parameters
SI         16384
SF         600.2300137 MHz
WDW        EM
SSB        0
LB         0.30 Hz
GB         0
PC         1.00
    
```

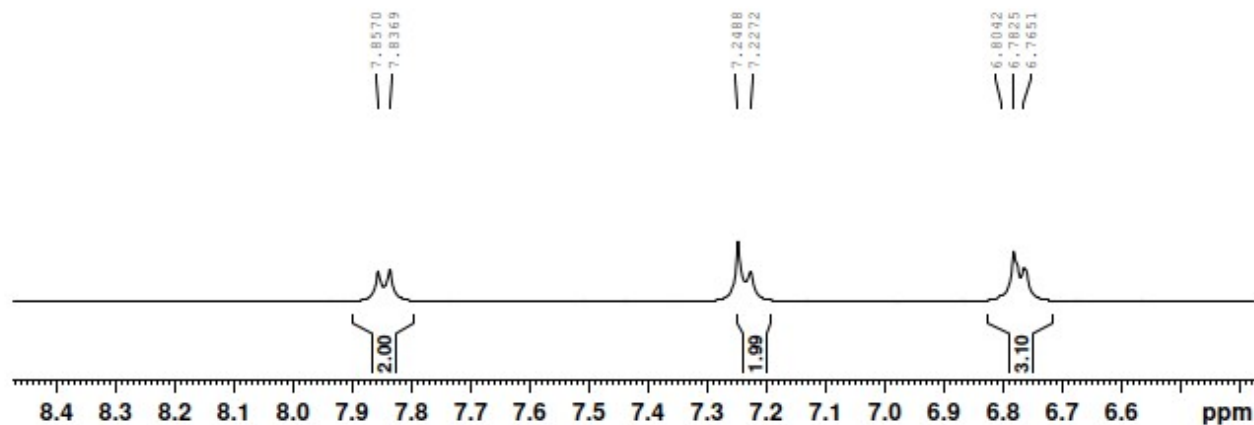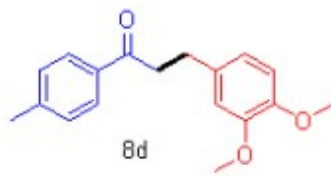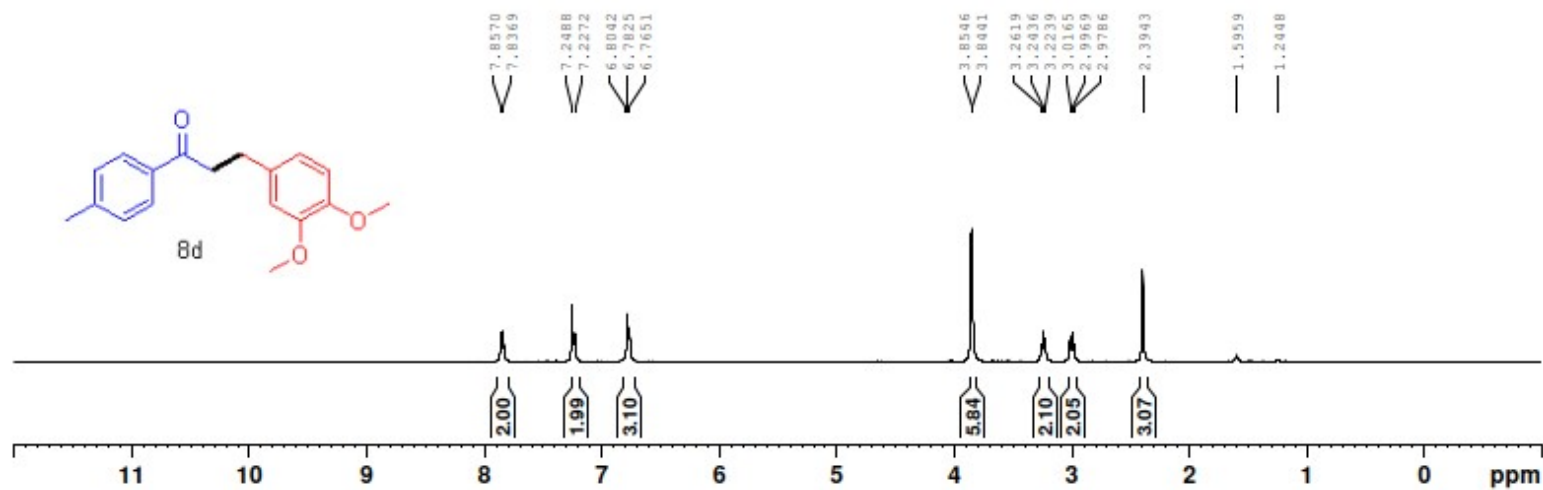

8e IN CDCl3

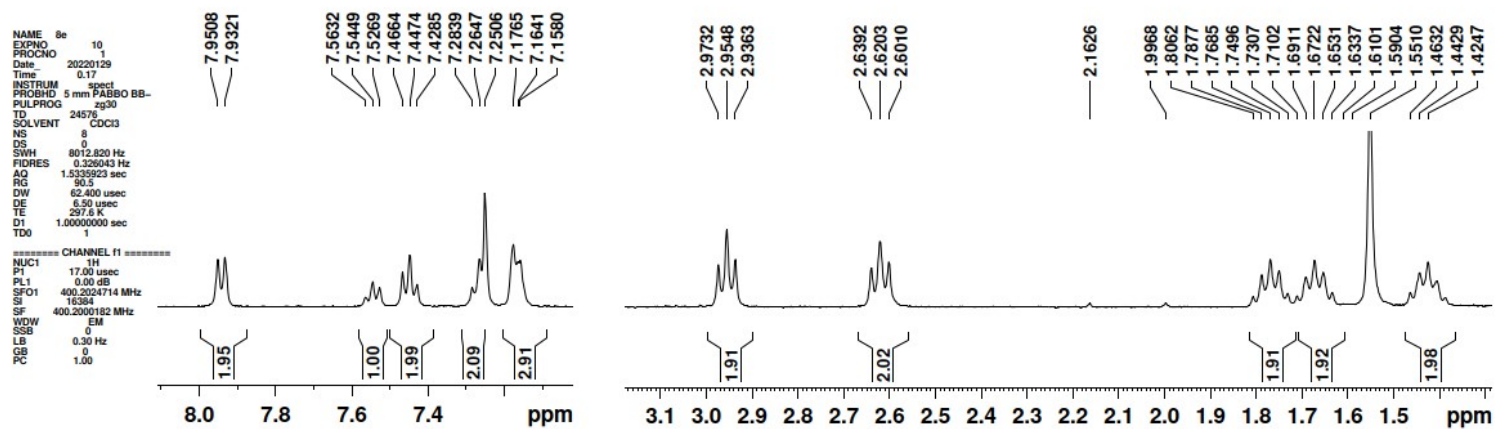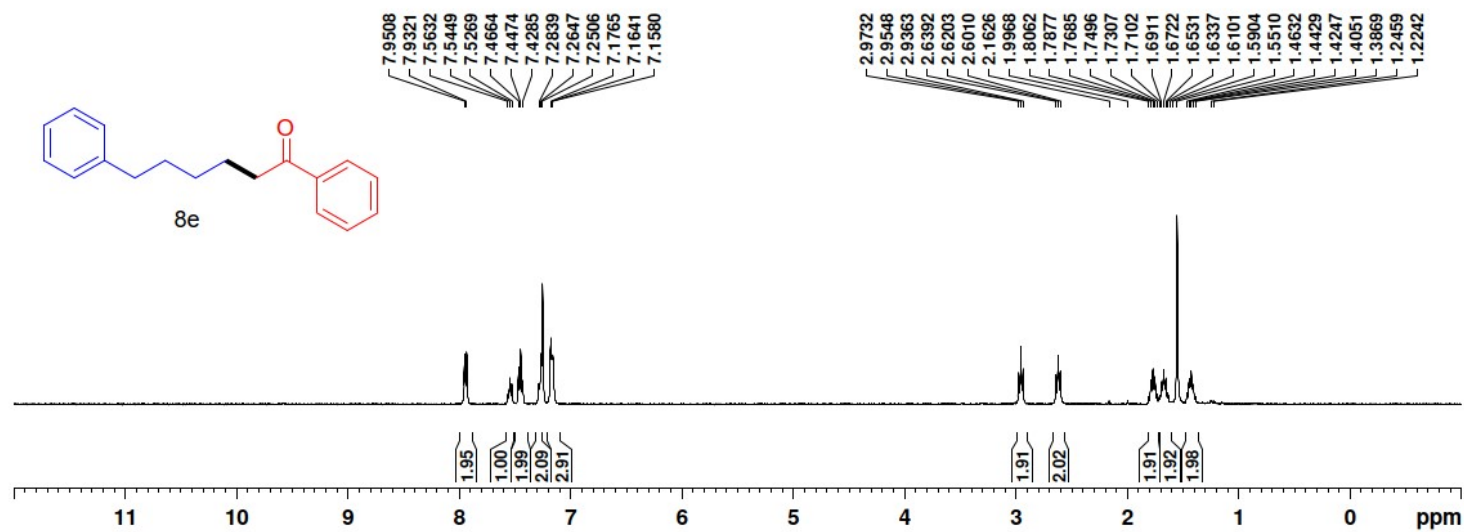

8f IN CDC13

```

Current Data Parameters
NAME      8f
EXPNO    1
PROCNO   1

F2 - Acquisition Parameters
Date_    20220225
Time     23.46 h
INSTRUM  spect
PROBHD   ZS246.0048 (pp
PULPROG  zg30
TD       24034
SOLVENT  CDCl3
NS       8
DS       0
SWH      8012.820 Hz
FIDRES   0.666735 Hz
AQ       1.4998465 sec
RG       203
CW       62.400 usec
DE       6.50 usec
TE       300.0 K
D1       0 sec
TD0      0
SFO1     400.1024006 MHz
NUC1     1H
RG       6.00 usec
P1       18.00 usec
PL1      10.00000000 W

F2 - Processing parameters
SI       16384
SF       400.1000130 MHz
WDW      EM
SSB      0
LB       0 Hz
GB       0
PC       1.00
    
```

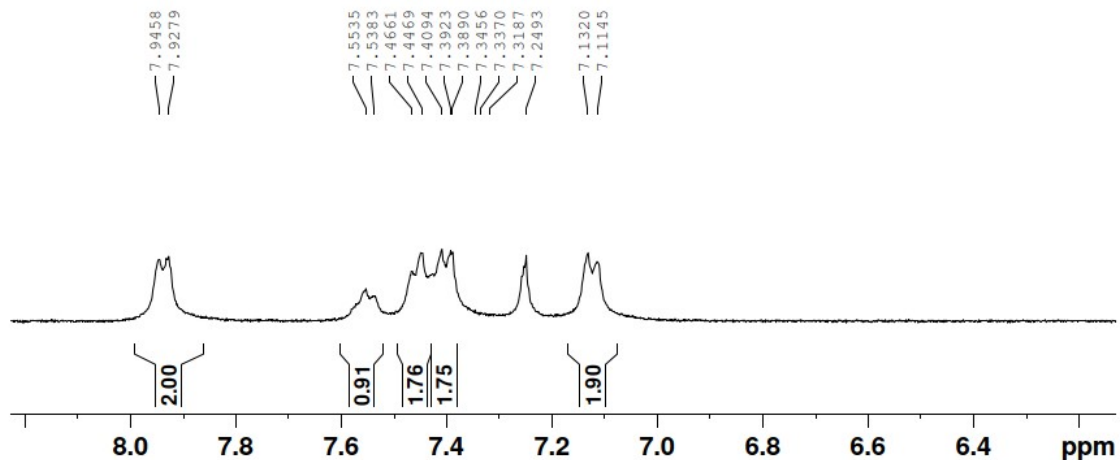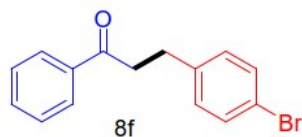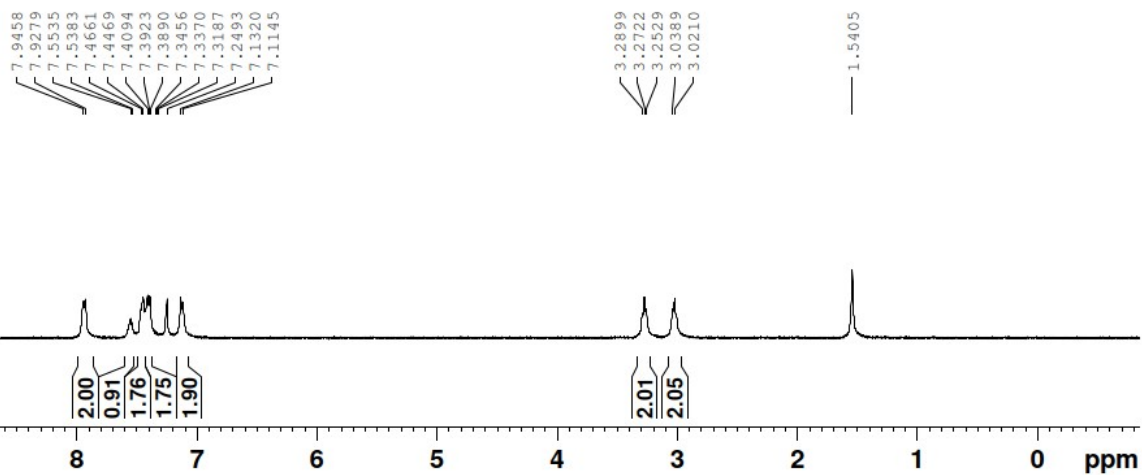

8g IN CDC13

Current Data Parameters  
NAME 8g  
EXPNO 10  
PROCNO 1  
F2 - Acquisition Parameters  
Date\_ 20220223  
Time 23:54 h  
INSTRUM spect  
PROBHD 1H246\_0048 (PS  
PULPROG zg30  
TD 246336  
SOLVENT CDC13  
NS 8  
DS 0  
SWH 8012.820 Hz  
FIDRES 0.666735 Hz  
AQ 1.4998463 sec  
RG 203  
DM 62.400 usec  
DE 6.50 usec  
TE 300.0 K  
SI 0  
TD0  
SFO1 400.1024004 MHz  
NUC1 1H  
PQ 4.00 usec  
P1 18.00 usec  
PLW1 10.00000000 W  
F2 - Processing parameters  
SI 16384  
SF 400.1000130 MHz  
WDW EM  
SSB 0  
LB 0 Hz  
GB 0  
PC 1.00

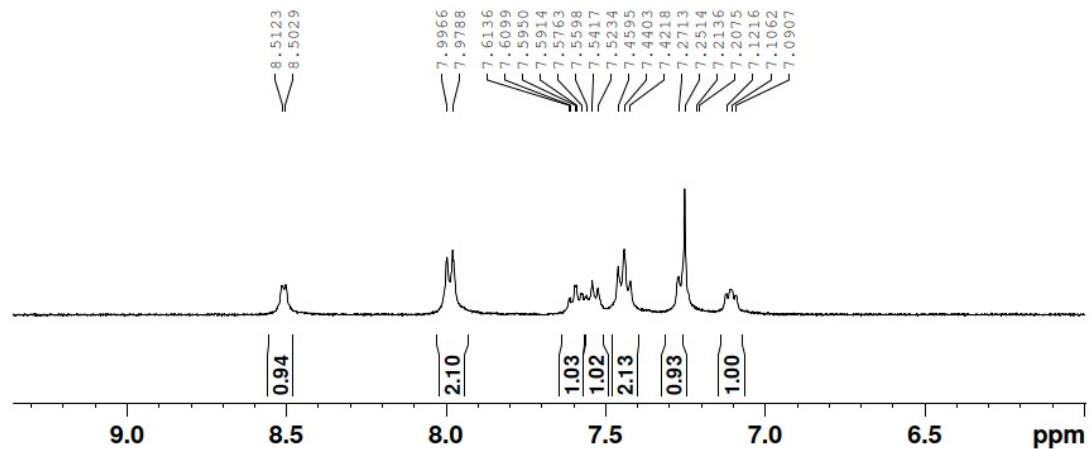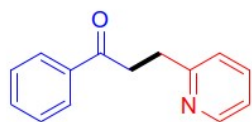

8g

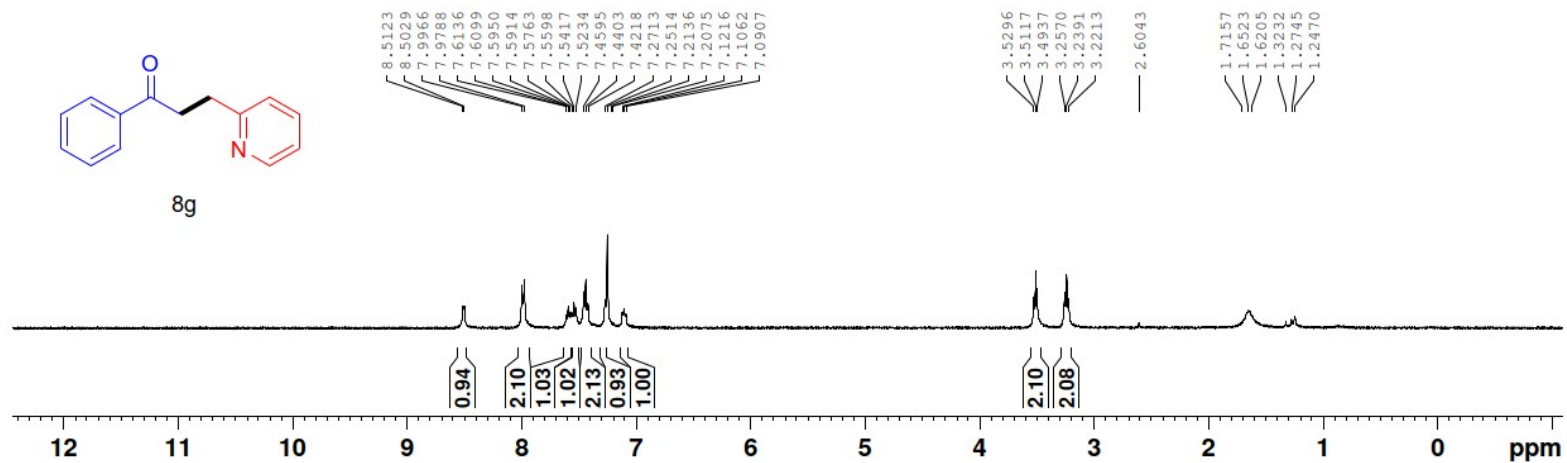

8h IN CDC13

```

Current Data Parameters
NAME      8h
EXPNO    10
PROCNO   1

F2 - Acquisition Parameters
Date_    20220308
Time     23:41 h
INSTRUM  spect
PROBHD   ZB246_0049 (9H)
PULPROG  zg30
TD        24036
SOLVENT  CDCl3
NS        8
DS        0
SWS       8012.820 Hz
FIDRES    0.666735 Hz
AQ        1.4998465 sec
RG         18
SWH        62.400 usec
DE         6.50 usec
TE        300.0 K
D1         0 sec
TDO        1
SFO1      400.1024008 MHz
NUC1       1H
PD         6.00 usec
P1        18.00 usec
PLM1      10.00000000 M

F2 - Processing parameters
SI         16384
SF         400.1000135 MHz
WDW        EM
SSB        0
LB         0 Hz
GB         0
PC         1.00
    
```

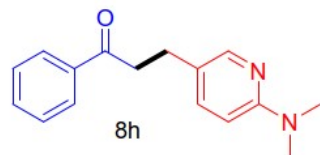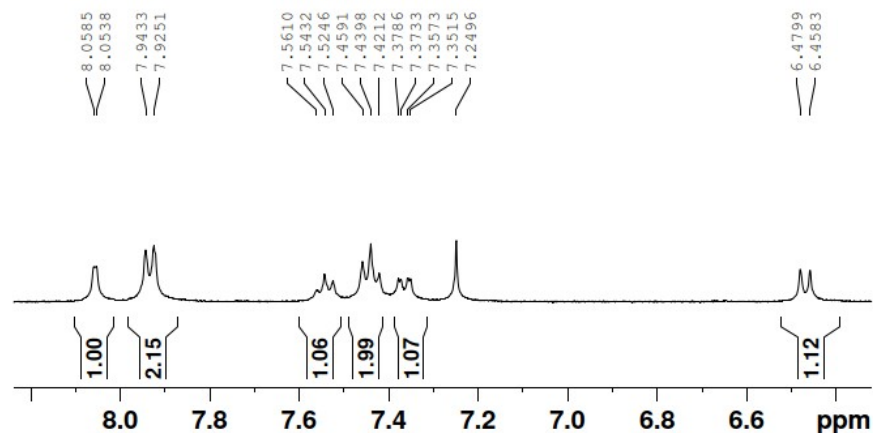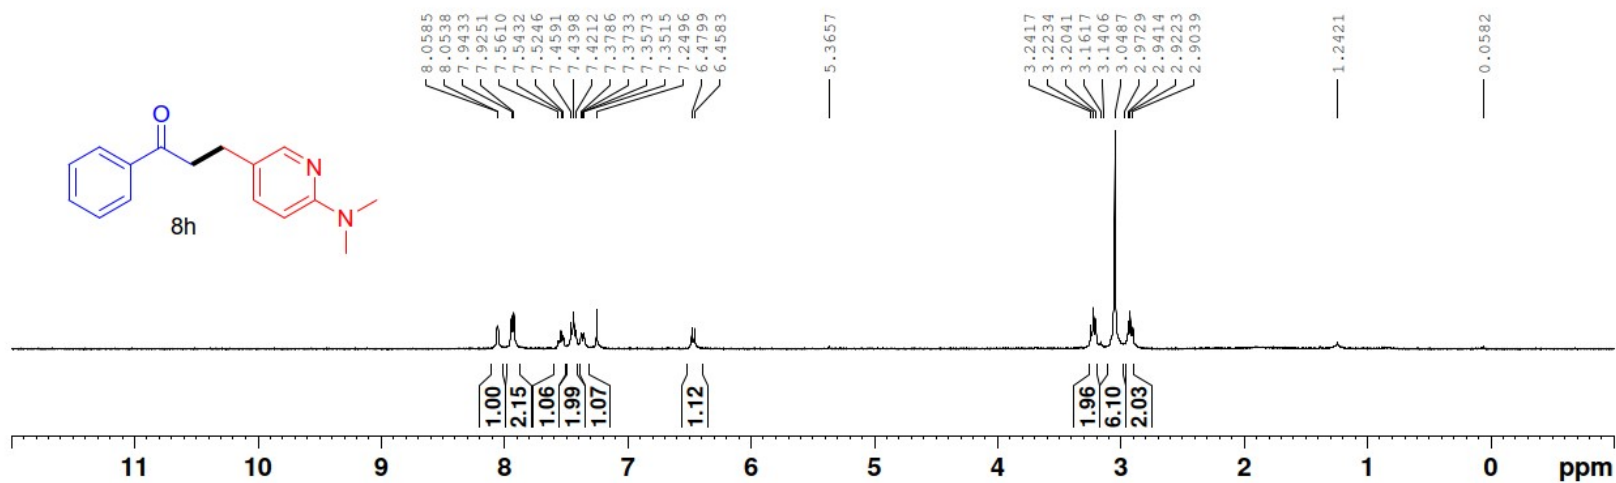

8h IN CDCl3-13C

Current Data Parameters  
 NAME 8h  
 EXPNO 40  
 PROCNO 1  
 F2 - Acquisition Parameters  
 Date\_ 20231023  
 Time 4.28 k  
 INSTRUM spect  
 PROCESSOR 20231023\_2153 L  
 FOLDER02 sggg10  
 NO 32768  
 SFO200 500.13  
 NS 2500  
 DS 4  
 ASG 25302.520 Hz  
 F2CROSS 1.561280 Hz  
 AQ 6.4665000 sec  
 RG 40  
 DS 16.0000000 sec  
 DE 6.5000000 sec  
 VE 2.0000000 Hz  
 GC 0.0000000 sec  
 DCL 0.0000000 sec  
 VSG 100.4378171 MHz  
 SFO1 125  
 DS 3.330000000  
 DE 10.000000000  
 PLAS0 40.000000000 W  
 AFM0 400.2316300 MHz  
 SFO2 10  
 F2CROSS2  
 PPGS0 80.000000000  
 PLAS0 19.140000000 W  
 PLAS2 0.688490001 W  
 SFO3 0.244900000 W  
 F2 - Processing parameters  
 AQ 32768  
 SF 100.4378171 MHz  
 NS 40  
 DS 4  
 LG 2.00 Hz  
 GC 1.40

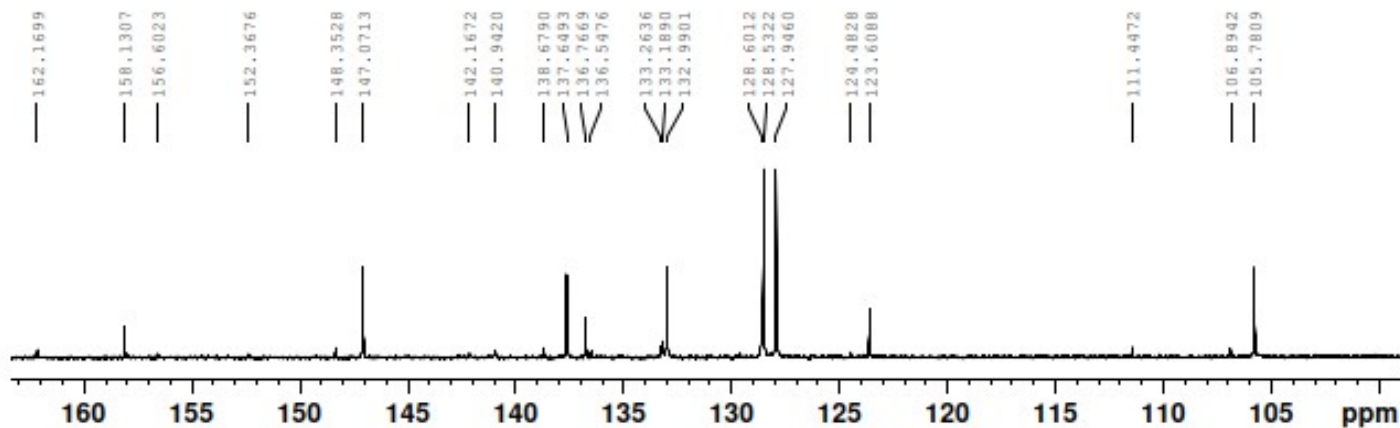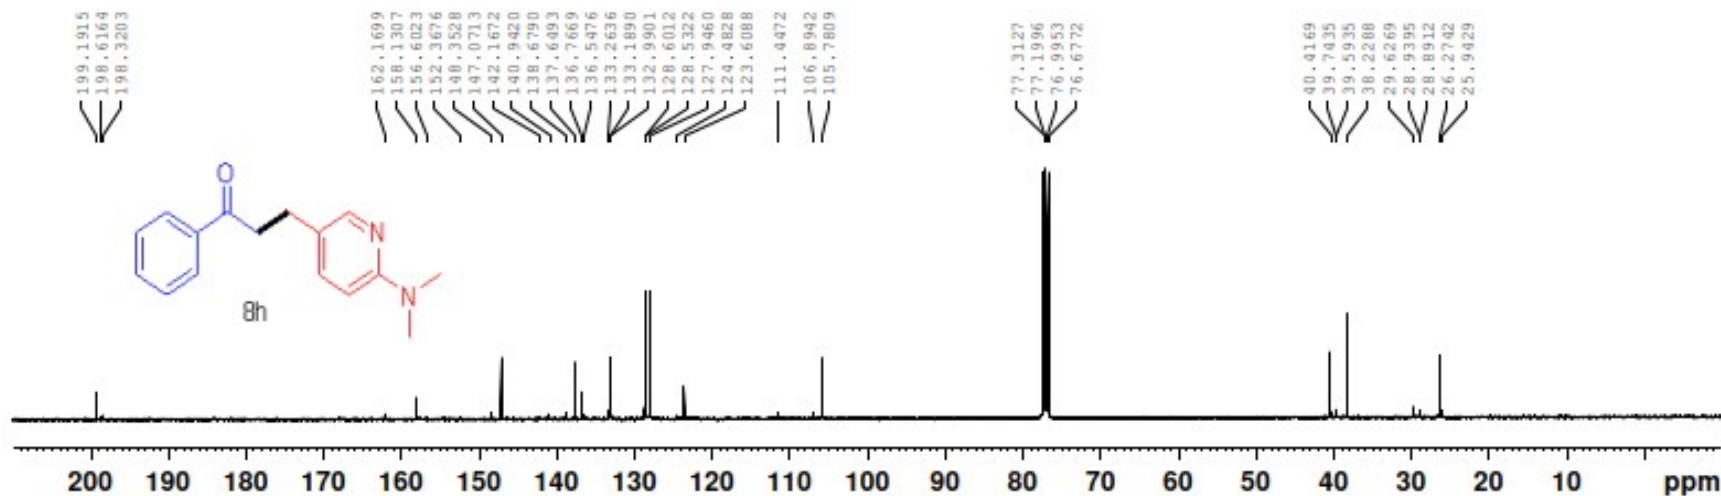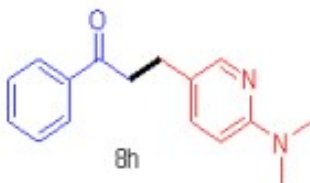

8i IN CDCl3

```

Current Data Parameters
NAME      8i
EXPNO    10
PROCNO   1

F2 - Acquisition Parameters
Date_    20200228
Time     8.23 h
INSTRUM  spect
PROBHD   ZB246.0048 (PZ)
PULPROG  zg30
TD        24236
SOLVENT  CDCl3
NS        8
DS        0
SWH       8012.820 Hz
FIDRES    0.466735 Hz
AQ        1.4998465 sec
RG         14.2
DM        62.400 usec
DE         6.50 usec
TE        300.0 K
D1        1.00000000 sec
TDO       1
SFO1     400.1024066 MHz
NUC1      13
PC        6.50 usec
P1        18.00 usec
PLW1     10.00000000 W

F2 - Processing parameters
SI        16384
SF        400.1000139 MHz
WDW       EM
SSB       0
LB        0 Hz
GB        0
PC        1.00
    
```

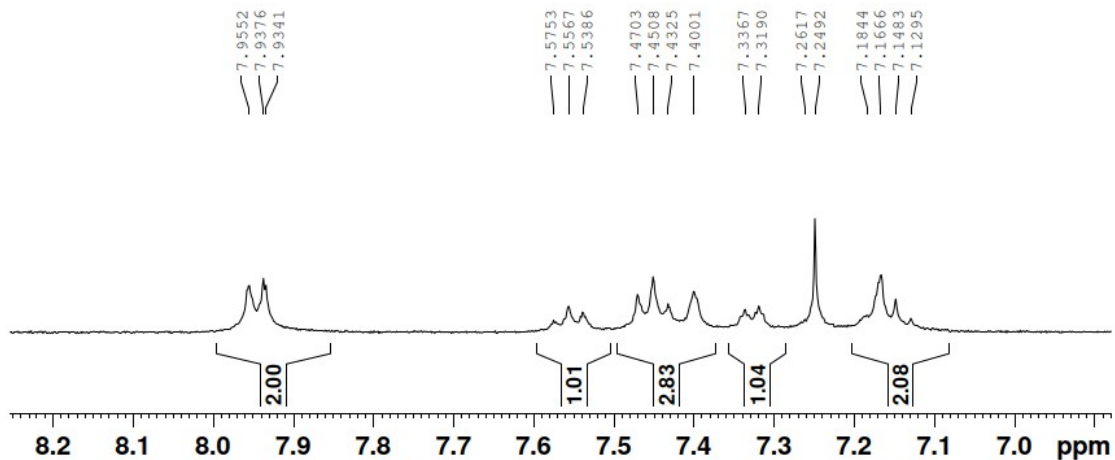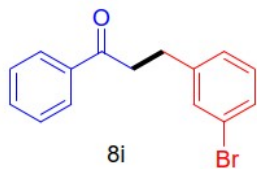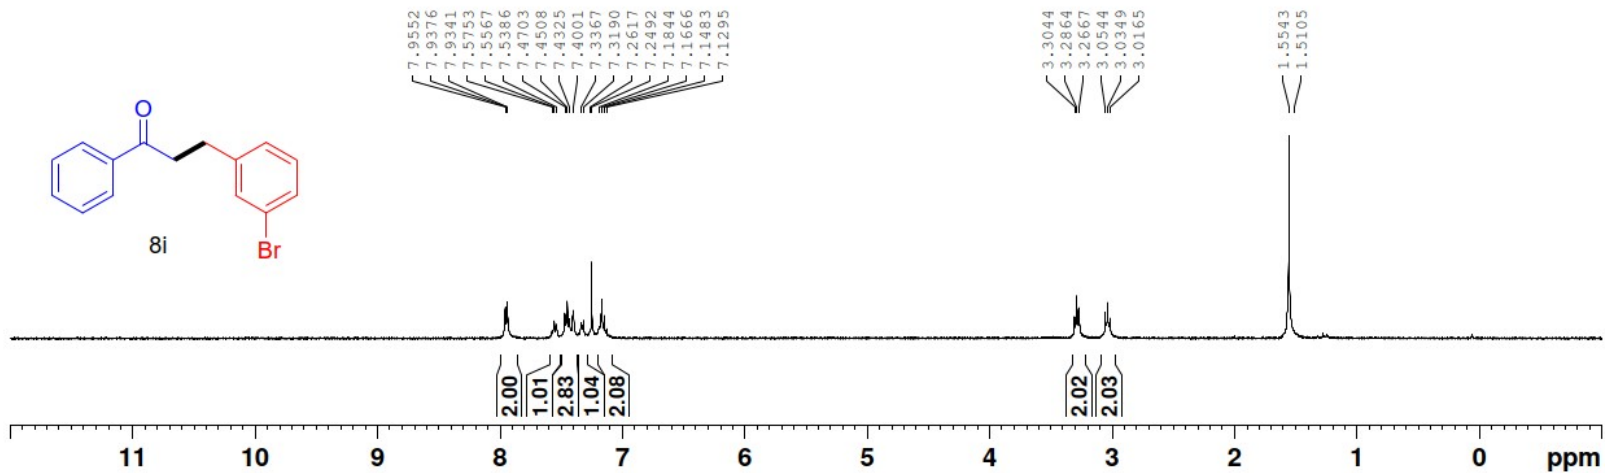



8j IN CDCl3

Current Data Parameters  
 NAME 8j  
 EXPNO 10  
 PROCNO 1  
 F2 - Acquisition Parameters  
 Date\_ 20220307  
 Time 14.13 h  
 INSTRUM spect  
 PROCNO 28246\_0048 (pp)  
 F1FREQ 300.0  
 TD 24036  
 SOLVENT CDCl3  
 NS 8  
 DS 0  
 SWH 8012.820 Hz  
 FIDRES 0.466735 Hz  
 AQ 1.4788465 sec  
 RG 203  
 DW 62.400 usec  
 DE 6.50 usec  
 TE 300.0 K  
 D1 1.00000000 sec  
 TSD 0  
 SFO1 400.1024006 MHz  
 NUC1 13  
 PU 6.00 usec  
 PL 18.00 usec  
 PWR1 10.00000000 W  
 F2 - Processing parameters  
 SI 16384  
 SF 400.1000140 MHz  
 DF 80  
 WDW EM  
 SSB 0  
 LB 0 Hz  
 GB 0  
 PC 1.00

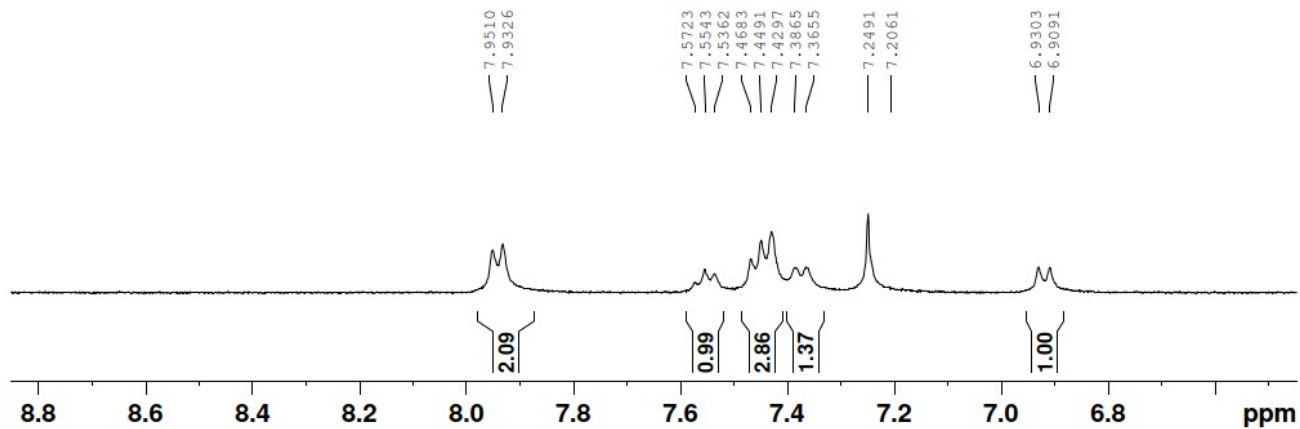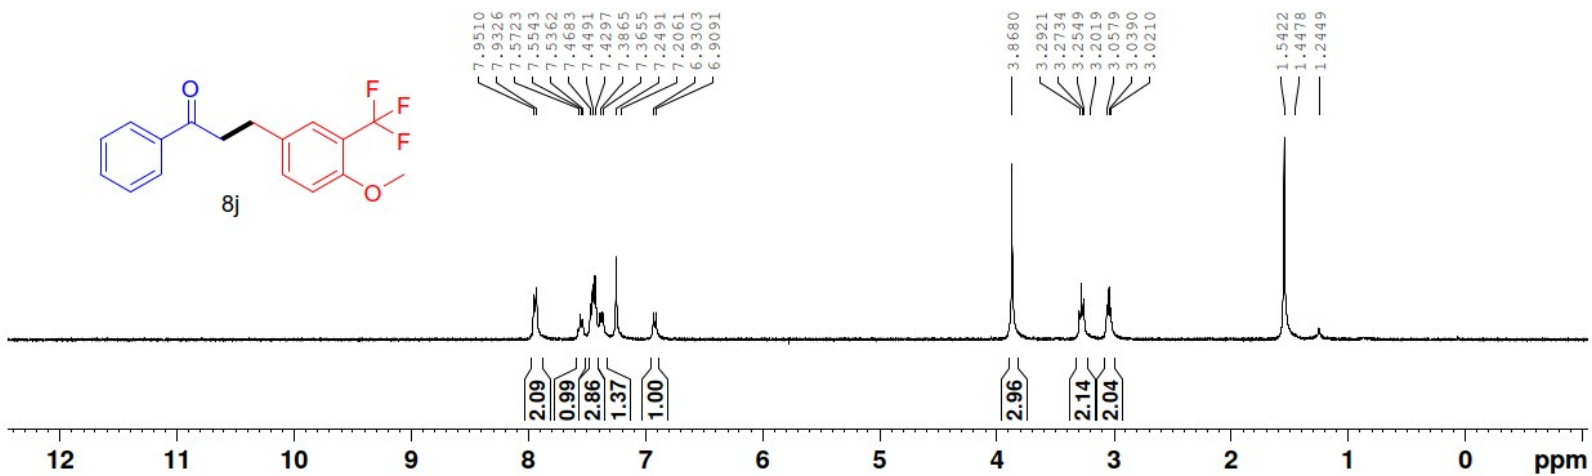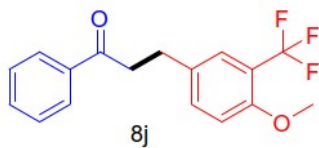

8j IN CDCl3-13C

Current Data Parameters  
 NAME 8j  
 EXPNO 60  
 PROCNO 1  
 F2 - Acquisition Parameters  
 Date\_ 20220416  
 Time 14.08  
 INSTRUM spect  
 PROBHD 5 mm PABBO BB-  
 PULPROG zgpg30  
 ID 65529930  
 SOLVENT CDCl3  
 NS 230  
 DS 4  
 SWH 25282.525 Hz  
 FWHZ 5.395323 Hz  
 AQ 1.297929 sec  
 RG 205  
 DW 19.800 usec  
 DE 4.00 usec  
 TE 67.3 K  
 D1 2.0000000 sec  
 D11 0.0300000 sec  
 T00 1  
 ===== CHANNEL f1 =====  
 NU1 13C  
 P1 6.75 usec  
 PL1 0.00 dB  
 SFO1 100.6261251 MHz  
 ===== CHANNEL C2 =====  
 CPDPRG2 waltz16  
 NUC2 1H  
 PCPD2 80.00 usec  
 PL2 0.00 dB  
 PL12 12.80 dB  
 PL13 17.00 dB  
 SFO2 400.2016000 MHz  
 F2 - Processing parameters  
 SI 32768  
 SF 100.6261251 MHz  
 WDW EM  
 SSB 0  
 LB 1.00 Hz  
 GB 0  
 PC 1.40

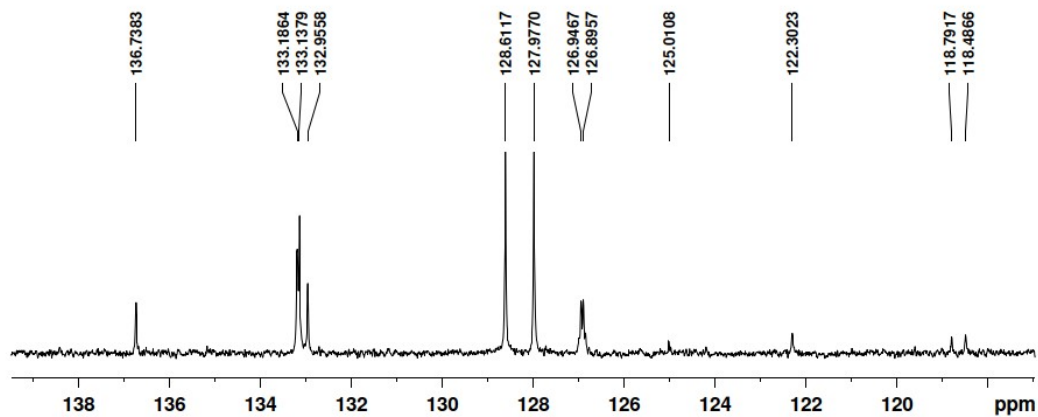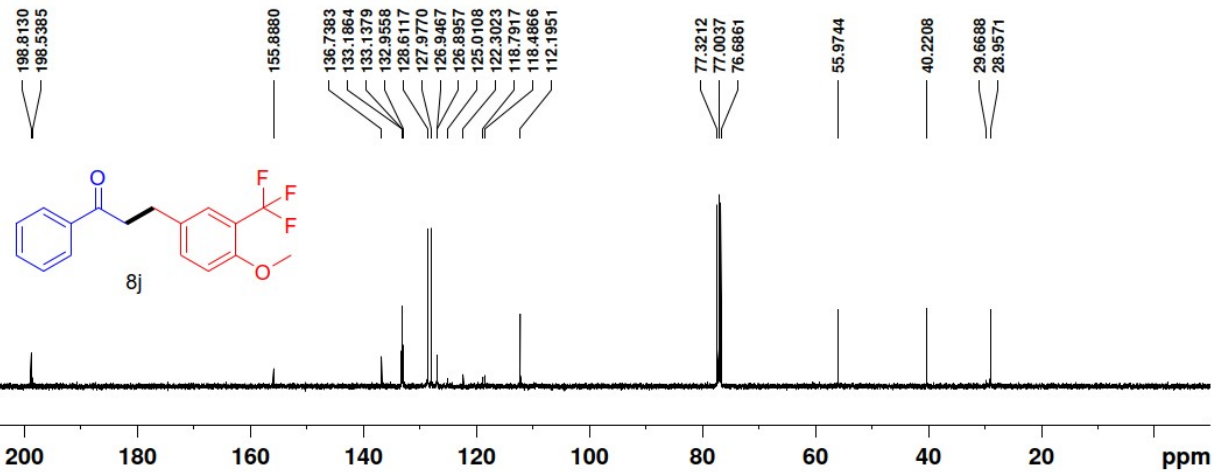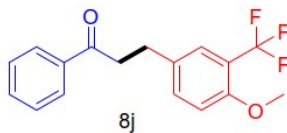

8j IN CDCl3-APT

Current Data Parameters  
 NAME: 8j  
 EXPNO: 61  
 PROCNO: 1  
 F2 - Acquisition Parameters  
 Date\_: 20220416  
 Time: 14.31  
 INSTRUM: spect  
 PROBHD: 5 mm PABBO BB-  
 PULPROG: mod  
 SI: 6532  
 SOLVENT: CDCl3  
 NS: 300  
 DS: 4  
 SWH: 24038.461 Hz  
 FIDRES: 0.366798 Hz  
 AQ: 1.3621988 sec  
 RG: 2000  
 DW: 20.000 usec  
 DE: 6.00 usec  
 TE: 672.3 K  
 CHST2: 100.000000  
 CHST11: 1.0000000  
 D1: 2.0000000 sec  
 DDB: 0.0068667 sec  
 TSD: 1  
 ===== CHANNEL f1 =====  
 NUC1: 13C  
 P1: 6.75 usec  
 PL1: 13.00 dB  
 SFO1: 100.626120 MHz  
 ===== CHANNEL f2 =====  
 CPOPRG2: waltz16  
 NUC2: 1H  
 PCPO2: 60.00 usec  
 PL2: 0.00 dB  
 PL12: 12.45 dB  
 SFO2: 400.201460 MHz  
 F2 - Processing parameters  
 SI: 32768  
 SF: 100.626120 MHz  
 WDW: EM  
 SSB: 0  
 LB: 1.00 Hz  
 GB: 0  
 CB: 0  
 PC: 1.40

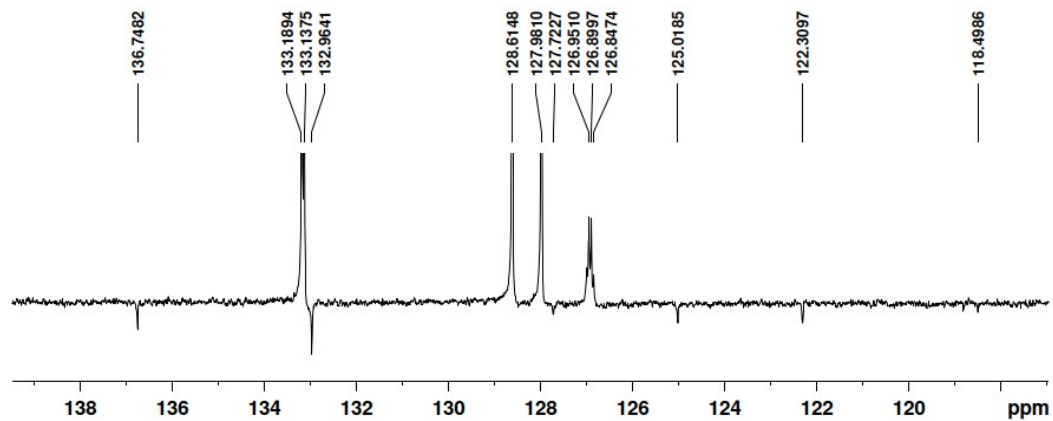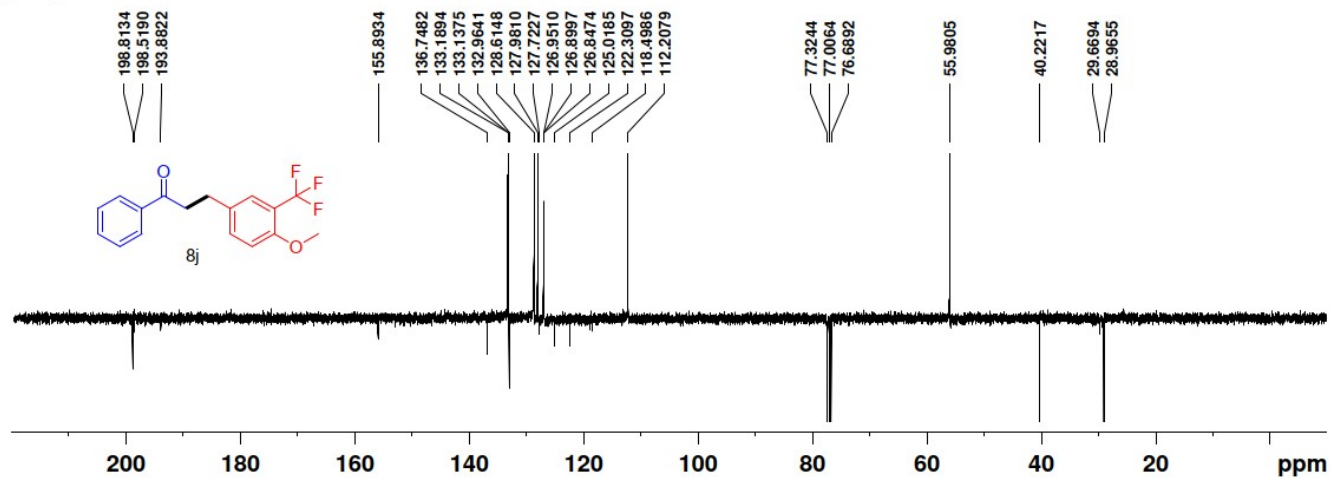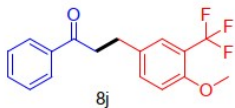

8k IN CDCl3

Current Data Parameters  
 NAME 8k  
 EXPRO 10  
 PROCNO 1

F2 - Acquisition Parameters  
 Date\_ 20220311  
 Time 23.31 h  
 INSTRUM spect  
 PROBHD 58246\_0048 (PH  
 PULPROG zg30  
 TD 24036  
 SOLVENT CDCl3  
 NS 8  
 DS 0  
 SWH 8012.820 Hz  
 FIDRES 0.666735 Hz  
 AQ 1.4998465 sec  
 RG 203  
 DW 62.400 usec  
 DE 6.50 usec  
 TE 300.0 K  
 D1 0 sec  
 TSD 1  
 SFO1 400.1024006 MHz  
 NUC1 1H  
 PU 6.00 usec  
 P1 18.00 usec  
 PLW1 10.00000000 W

F2 - Processing parameters  
 SI 16384  
 SF 400.1000138 MHz  
 WM 6K  
 SSB 0  
 LB 0 Hz  
 GB 0  
 PC 1.00

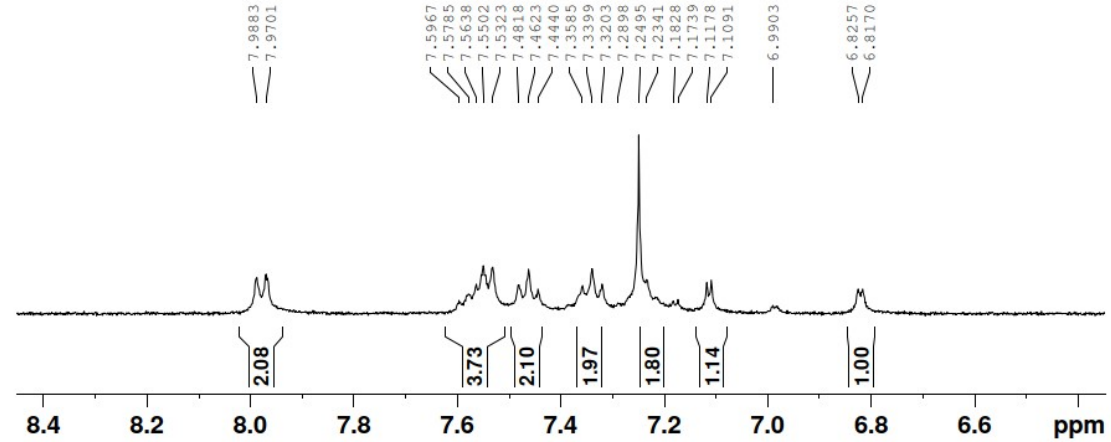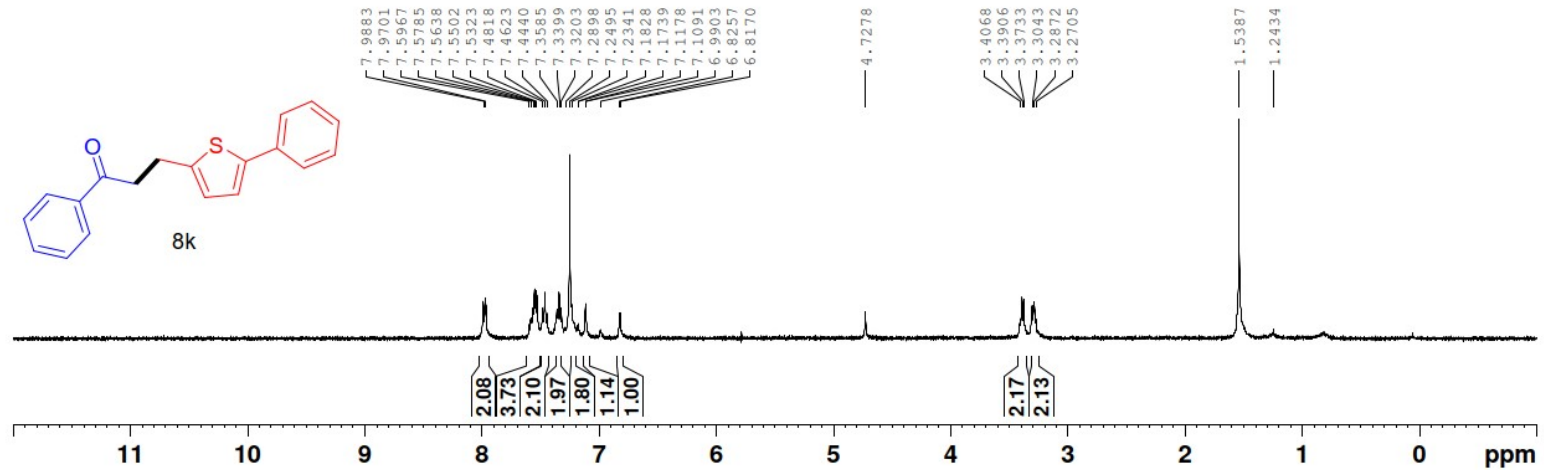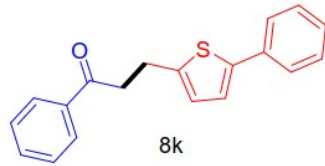

8k IN CDC13-13C

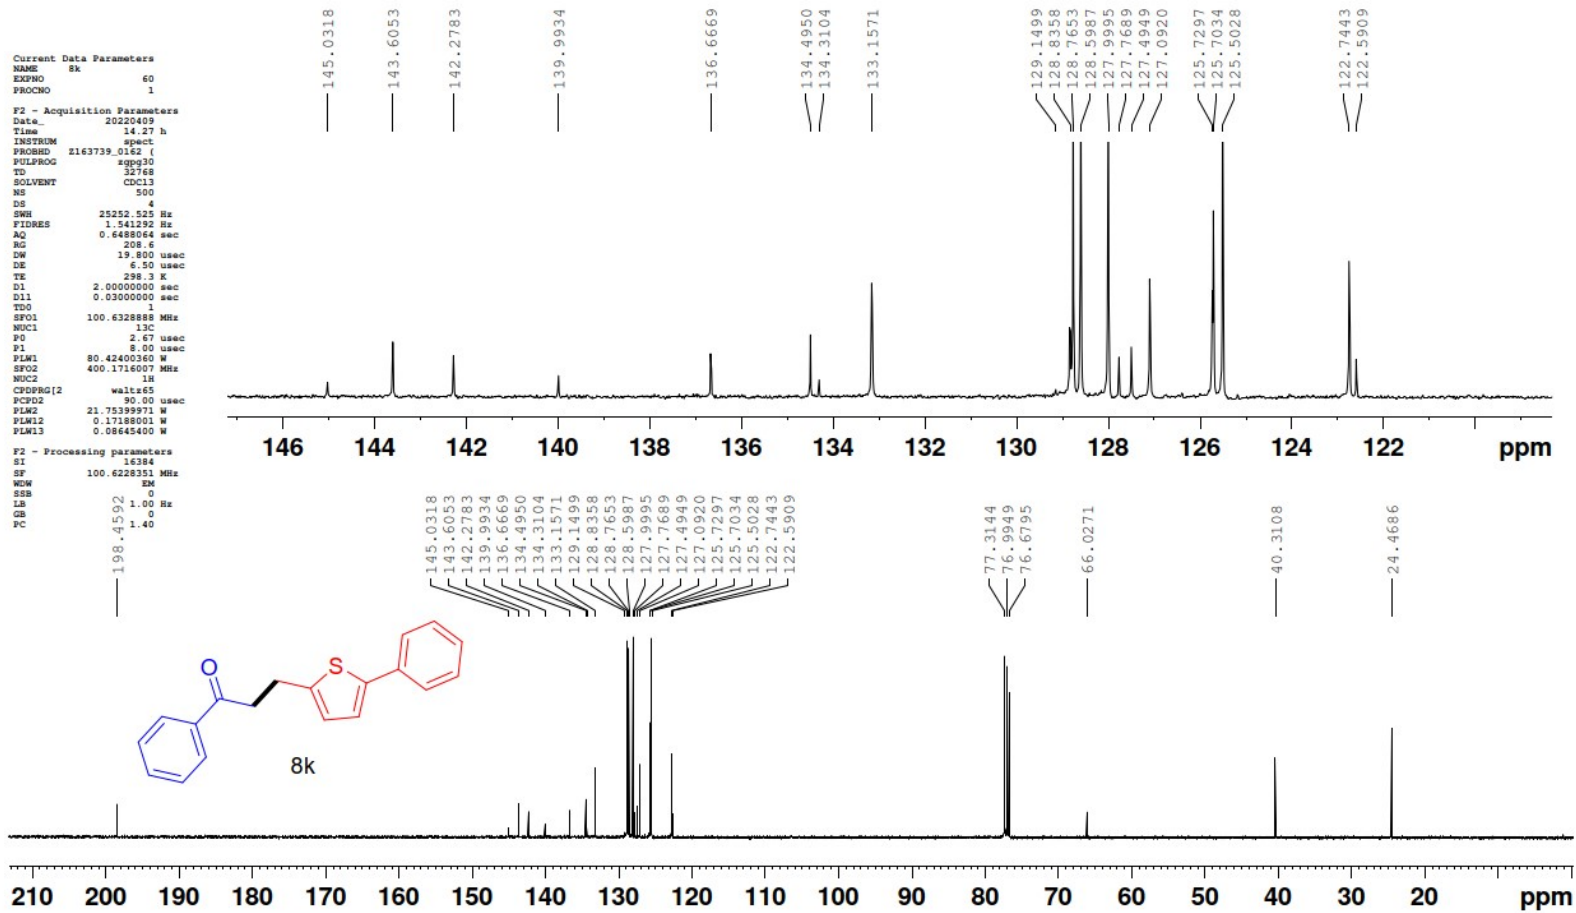

8k IN CDCL3-APT

```

Current Data Parameters
NAME      8k
EXPNO    61
PROCNO   1

F2 - Acquisition Parameters
Date_    20220409
Time     14.49 h
INSTRUM  spect
PROBHD   E163739_0152 (
PULPROG  smpt
TD       32768
SOLVENT  CDCl3
NS       500
DS       4
SWH      25252.525 Hz
FIDRES   1.541292 Hz
AQ       0.6488064 sec
RG       258.6
DW       19.800 usec
DE       6.50 usec
TE       298.7 K
CNSF2    145.0000000
CNSF11   1.0000000
D1       2.0000000 sec
D20     0.00689655 sec
TD0      1
SFO1    100.6328888 MHz
NUC1     13C
P1       8.00 usec
P2       16.00 usec
PLM1    80.42400360 W
SFO2    400.1714007 MHz
NUC2     1H
CPDPRG2  waltz165
PCPD2    90.00 usec
PLM2    21.75399971 W
PLM12   0.17188001 W

F2 - Processing parameters
SI       16384
SF       100.6228352 MHz
RG       0
WDW      EM
SSB      0
LB       1.00 Hz
GB       0
PC       1.40
    
```

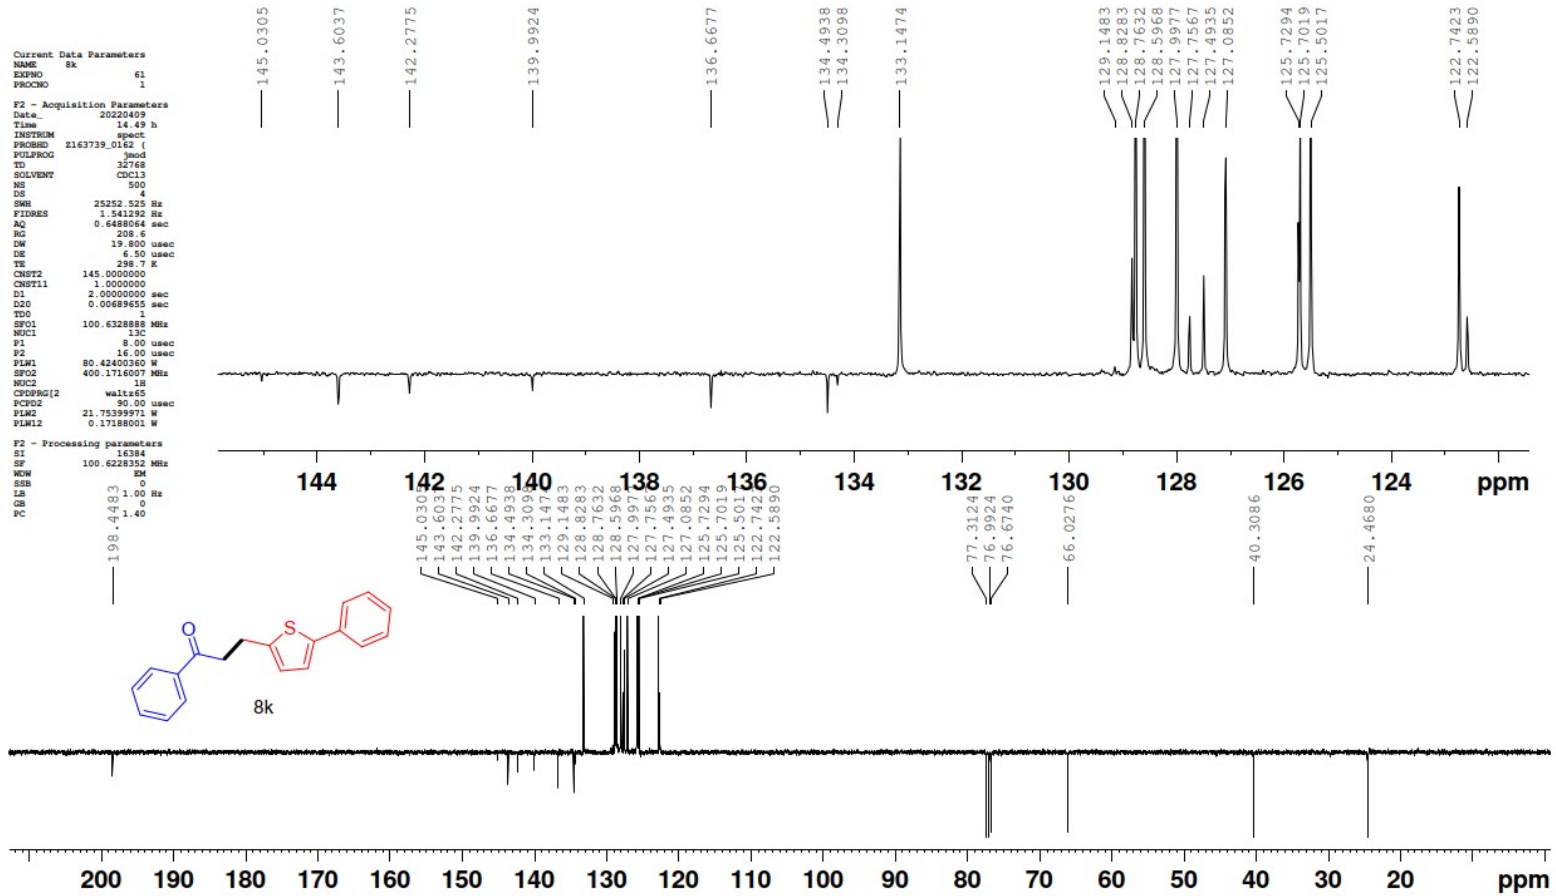

81 IN MeOD

Current Data Parameters  
 NAME 81  
 EXPNO 10  
 PROCNO 1  
 F2 - Acquisition Parameters  
 Date\_ 20220828  
 Time 13:33 h  
 INSTRUM spect  
 PROCNO 81244\_0048.DW  
 F1FREQ 400.0150  
 ID 24036  
 SOLVENT MeOD  
 NS 8  
 DS 4  
 SWH 8022.800 MHz  
 FIDRES 0.666735 Hz  
 AQ 1.4999883 sec  
 RG 24.2  
 SF 62.400 MHz  
 CB 6.50 MHz  
 TE 300.2 K  
 SI 1.00000000 sec  
 TD 400.1024000 MHz  
 SFO 400.1024000 MHz  
 SI 10.00000000 sec  
 SF 400.10000000 MHz  
 F2 - Processing parameters  
 SI 16384  
 SF 400.1000114 MHz  
 DS 4  
 SWH 8000.000 MHz  
 FIDRES 0.06250000 Hz  
 AQ 1.00000000 sec  
 RG 24.2  
 SF 62.400 MHz  
 CB 6.50 MHz  
 TE 300.2 K  
 SI 1.00000000 sec

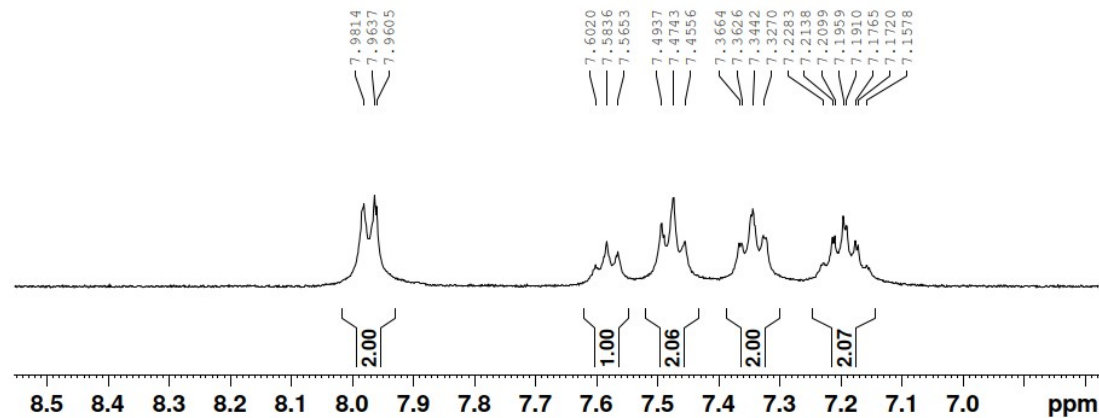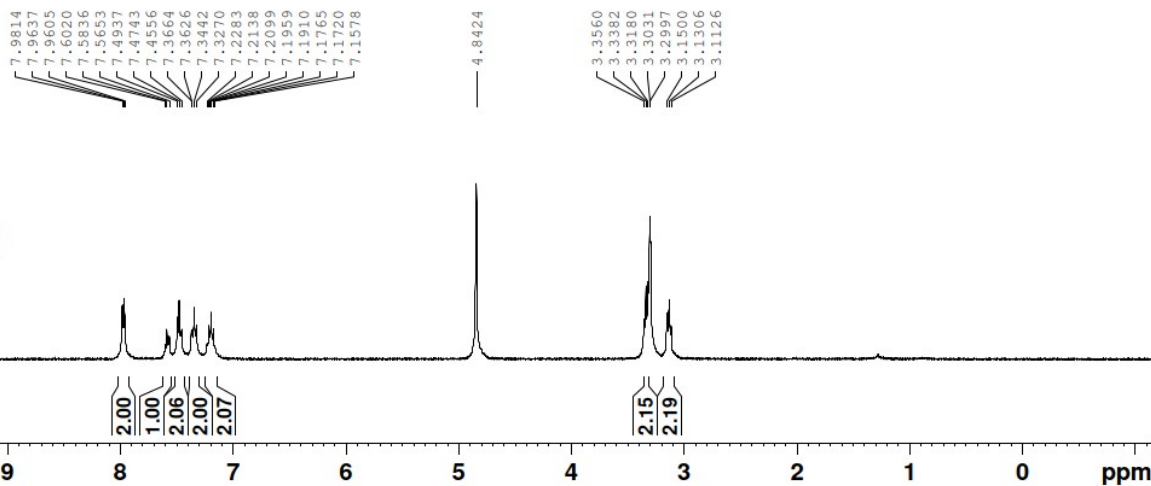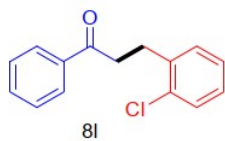

8m IN CDC13

```

Current Data Parameters
NAME      8m
EXPNO    10
PROCNO   1

F2 - Acquisition Parameters
Date_    20220224
Time     23:23 h
INSTRUM  spect
PROBHD   28246.0048 [mm]
PULPROG  zgpg30
TD        24536
SOLVENT  CDCl3
NS        8
DS        0
SWH       8012.820 Hz
FIDRES    0.466735 Hz
AQ         1.4998465 sec
RG         16
AQ         62.400 usec
DE         6.50 usec
TE         300.2 K
D1         1.00000000 sec
TD0
SFO1      400.1024006 MHz
NUC1       13
PC         4.83 usec
PI         14.50 usec
P1M1      10.00000000 sec

F2 - Processing parameters
SI         16384
SF         400.1000137 MHz
WDW        EM
SSB        0
LB         0 Hz
GB         0 Hz
PC         1.00
    
```

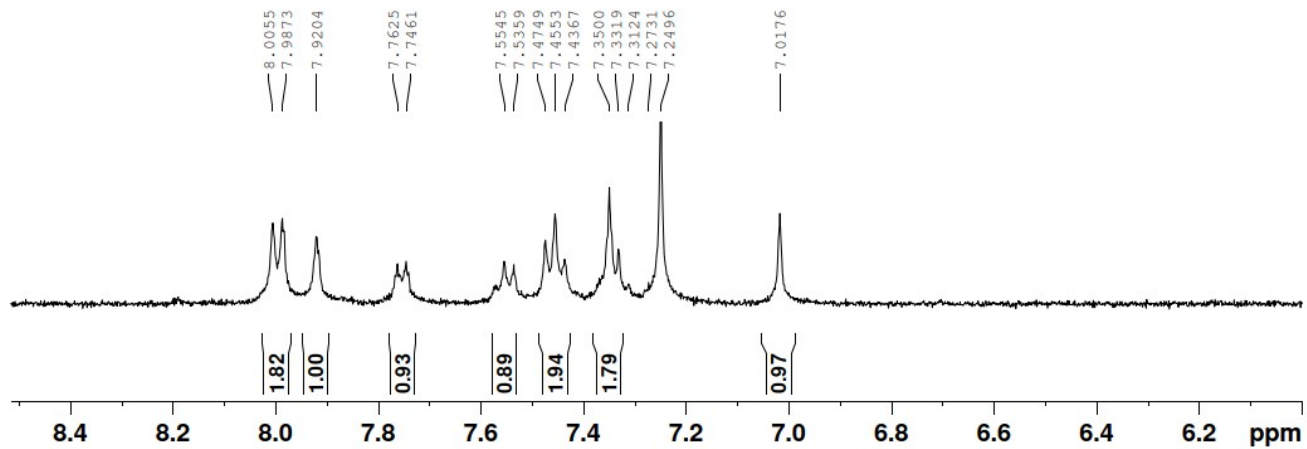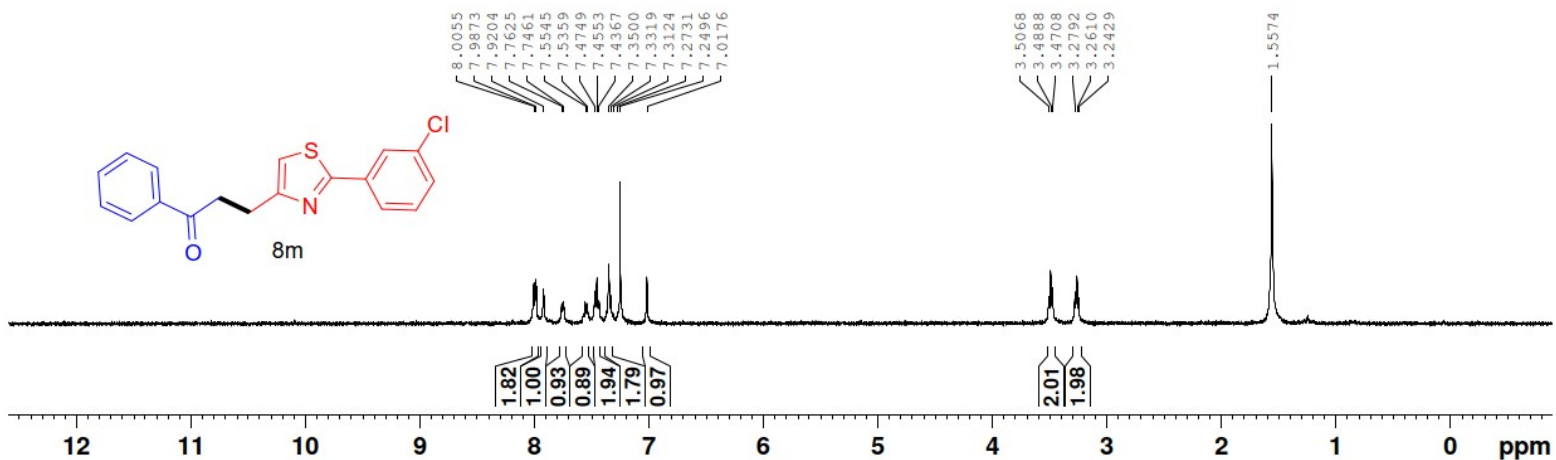



8m IN CDCl3-13C

Current Data Parameters  
 NAME 8m  
 EXPNO 60  
 PROCNO 1

F2 - Acquisition Parameters  
 Date\_ 20220404  
 Time 14.12 h  
 INSTRUM spect  
 PROBHD Z163739\_0162 ( )  
 PULPROG zgpg30  
 TD 32768  
 SOLVENT CDCl3  
 NS 386  
 DS 4  
 SWH 25252.525 Hz  
 FIDRES 1.541292 Hz  
 AQ 0.6488564 sec  
 RG 208.6  
 DW 19.890 usec  
 DE 6.50 usec  
 TE 298.6 K  
 D1 2.00000000 sec  
 D11 0.03000000 sec  
 TD0 1  
 SFO1 100.6328888 MHz  
 NUC1 13C  
 P0 2.87 usec  
 P1 8.00 usec

F2 - Processing parameters  
 SI 16384  
 SF 100.6228333 MHz  
 WDW EM  
 SSB 0  
 LB 1.00 Hz  
 GB 0  
 PC 1.40

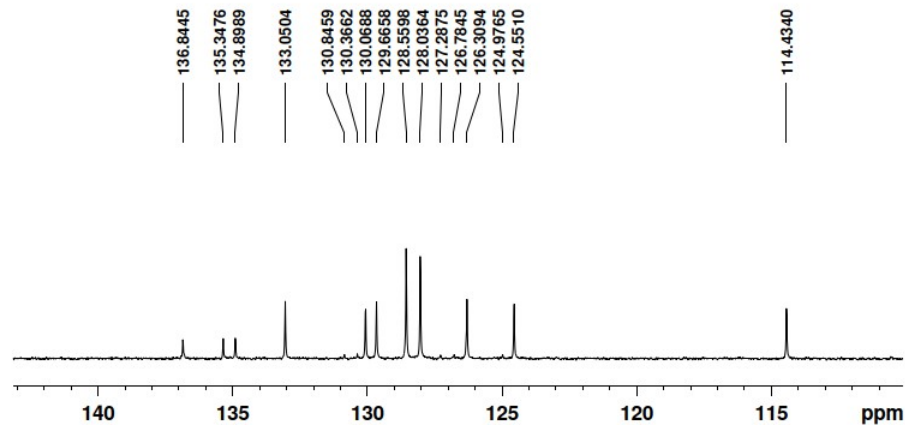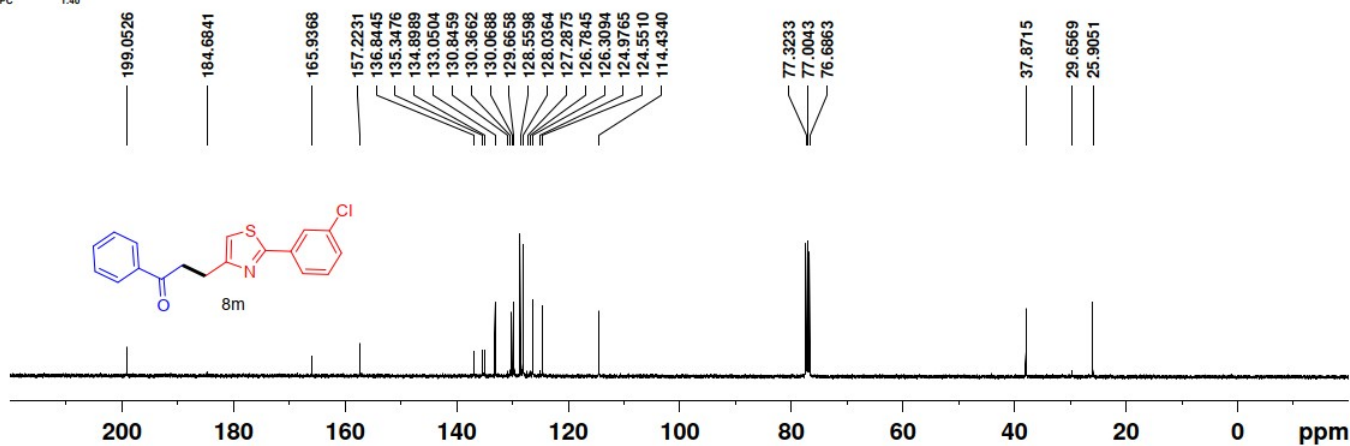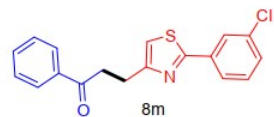

8m IN CDCl3-APT

Current Data Parameters

NAME 8m  
 EXPNO 61  
 PROCNO 1  
 F2 - Acquisition Parameters  
 Date\_ 20220404  
 Time 14.23 h  
 INSTRUM spect  
 PROBHD Z163739 D162 ( )  
 PULPROG jmod  
 TD 32768  
 SOLVENT CDCl3  
 NS 238  
 DS 4  
 SWH 25282.525 Hz  
 FIDRES 1.541292 Hz  
 AQ 0.6489564 sec  
 RG 206.6  
 DW 19.890 usec  
 DE 6.50 usec  
 TE 298.9 K  
 CNST2 145.0000000  
 CNST11 1.0000000  
 D1 2.00000000 sec  
 D20 0.0069655 sec  
 TDO 1  
 SFO1 100.6228336 MHz  
 NUC1 13C  
 P1 8.00 usec  
 P2 16.00 usec  
 F2 - Processing parameters  
 SI 16384  
 SF 100.6228336 MHz  
 WDW EM  
 SSB 0  
 LB 1.00 Hz  
 GB 0  
 PC 1.40

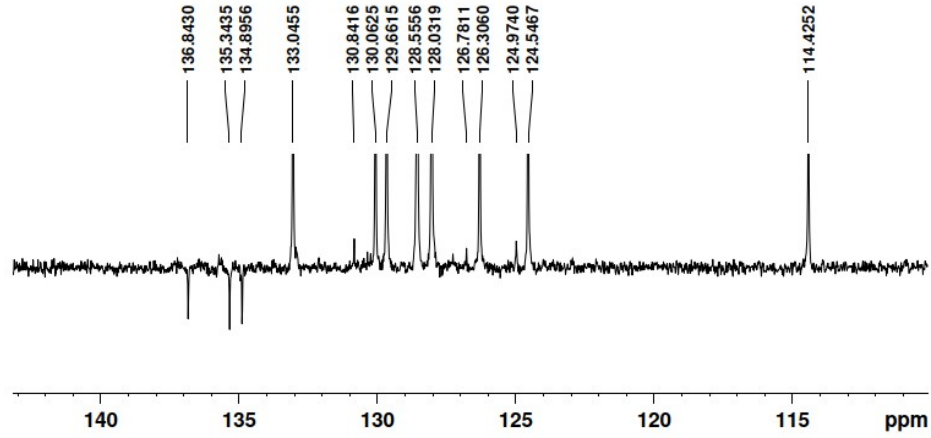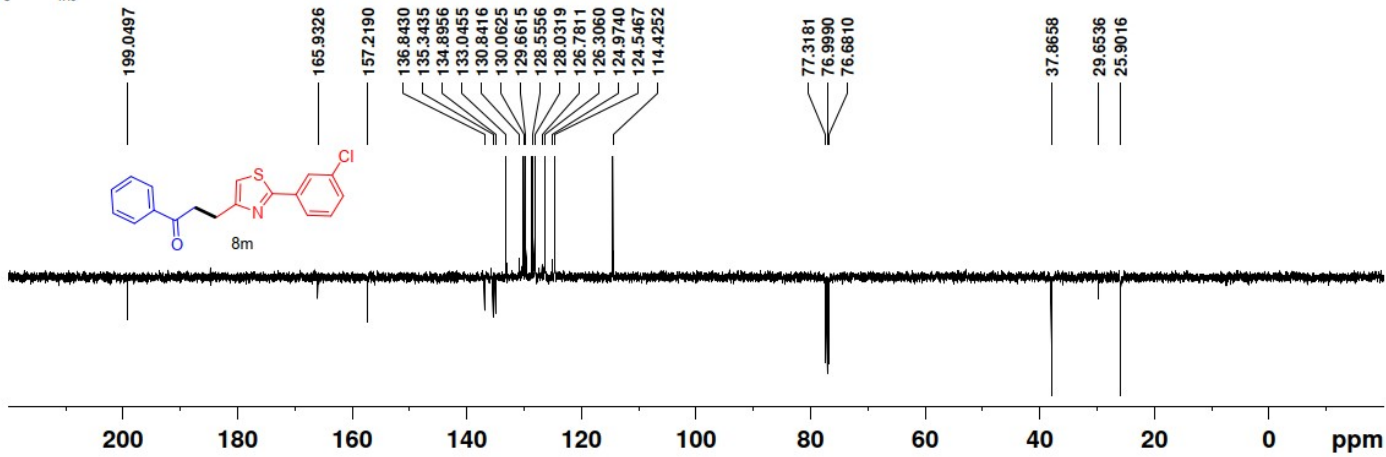

8n IN CDCl3

```

NAME 8n
EXPNO 10
PROCNO 1
Date_ 20220122
Time 13.44
INSTRUM spect
PROBHD 5 mm PABBO BB-
PULPROG zg30
TD 24576
SOLVENT CDCl3
NS 8
DS 0
SWH 8012.820 Hz
FIDRES 0.235043 Hz
AQ 1.333953 sec
RG 101
DW 62.400 usec
DE 6.50 usec
TE 298.1 K
D1 1.0000000 sec
TDO 1
===== CHANNEL f1 =====
NUC1 1H
P1 17.00 usec
PL1 0.00 dB
SFO1 400.2024714 MHz
SI 16384
SF 400.200182 MHz
WDW EM
SSB 0
LB 0.30 Hz
GB 0
PC 1.00
    
```

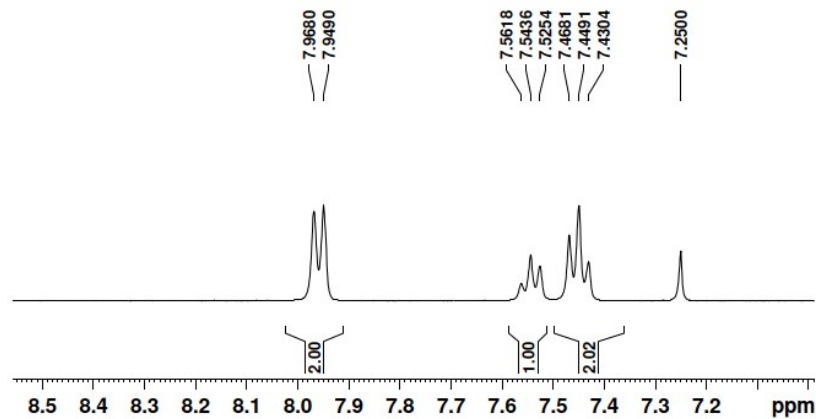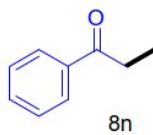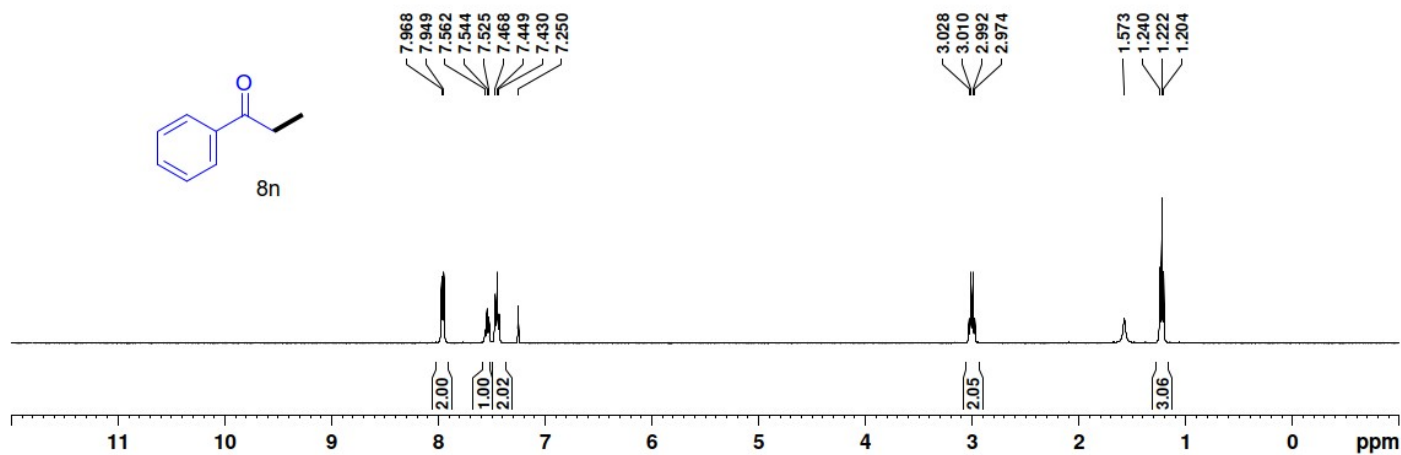

8o IN CDCl3

Current Data Parameters  
 NAME 8o  
 EXPNO 10  
 PROCNO 1  
 F2 - Acquisition Parameters  
 Date\_ 20211228  
 Time 22:08 h  
 INSTRUM spect  
 PROBHD Z8246 0048 (PH)  
 PULPROG zg30  
 TD 24036  
 SOLVENT CDCl3  
 NS 8  
 DS 0  
 SWH 8012.820 Hz  
 FIDRES 0.566735 Hz  
 AQ 1.4989964 sec  
 RG 203  
 DW 62.400 usec  
 DE 6.50 usec  
 TE 300.0 K  
 D1 1.00000000 sec  
 TD0 1  
 SFO1 400.1024006 MHz  
 NUC1 1H  
 PU 6.00 usec  
 P1 18.00 usec  
 F2 - Processing parameters  
 SI 16384  
 SF 400.1001139 MHz  
 WCNW 0  
 SSB 0  
 LB 0.00 Hz  
 GB 0  
 PC 1.00

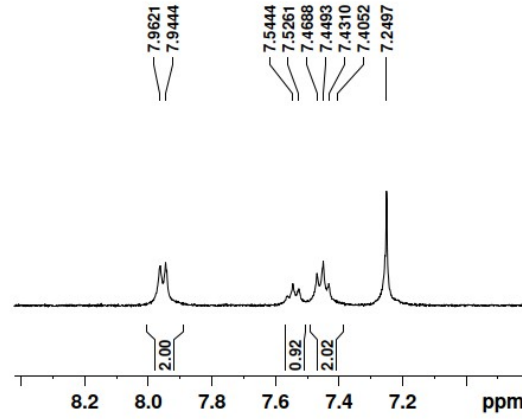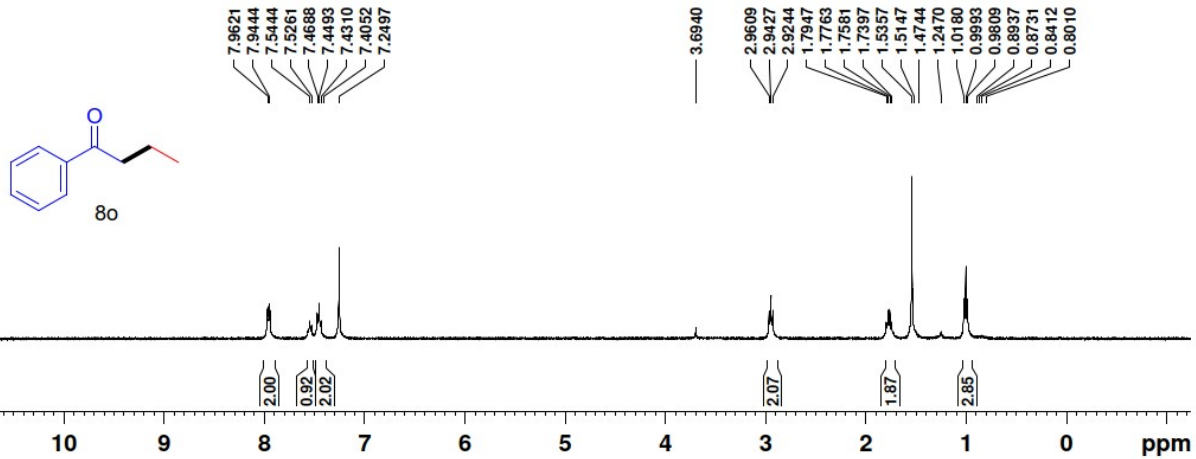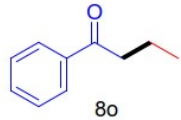

8p IN CDCl3

```

Current Data Parameters
NAME 8p_22PNO
ID
PROCNO 1
F2 - Acquisition Parameters
Date_ 20220215
Time 15:11 h
INSTRUM spect
PULSEPRG zgpg30
TD 24036
SOLVENT CDCl3
NS 6
DS 0
SWH 8012.820 Hz
FIDRES 0.666735 Hz
AQ 1.4998465 sec
RG 203
DM 62.400 usec
DE 6.50 usec
TE 300.0 K
D1 0 sec
TD0
SFO1 400.1024006 MHz
HDC1 12
P0 4.83 usec
P1 14.50 usec
PCPL 10.00000000 W
F2 - Processing parameters
SI 16384
SF 400.1000139 MHz
WDW EM
SSB 0
LB 0 Hz
GB 0
PC 1.00
    
```

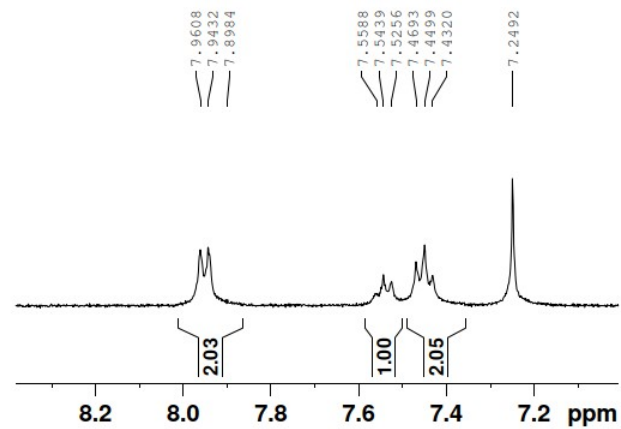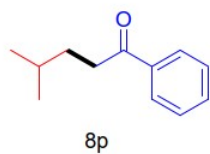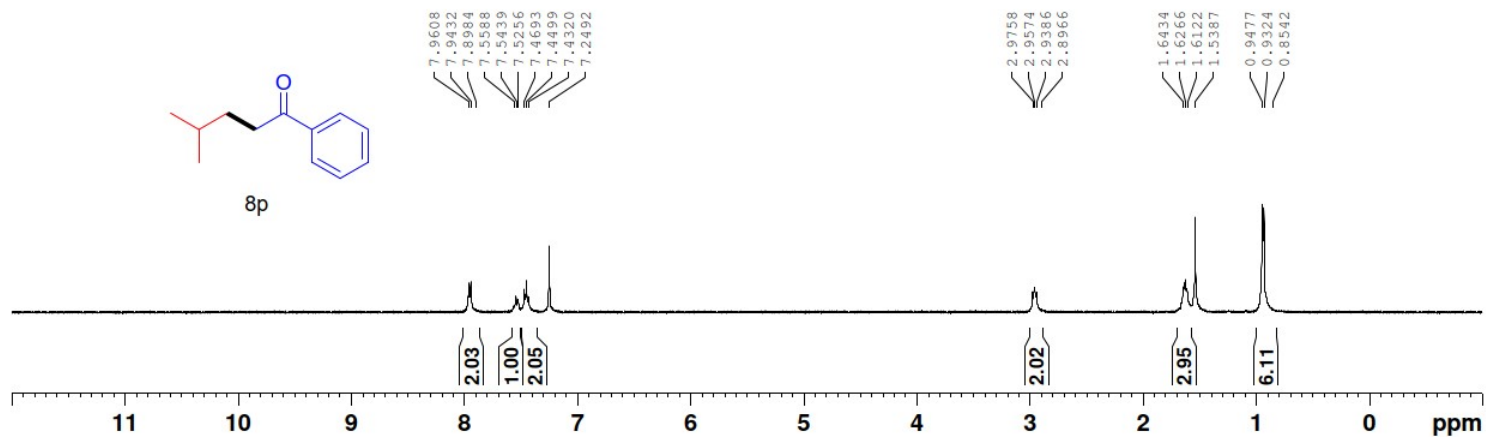

8q IN CDCl3

Current Data Parameters  
 NAME 8q  
 EXPNO 10  
 PROCNO 1

F2 - Acquisition Parameters  
 Date\_ 20211226  
 Time 16.35 h  
 INSTRUM spect  
 PROCBD Z8246\_0048 (PH  
 PULPROG zg30  
 TD 24036  
 SOLVENT CDCl3  
 NS 8  
 DS 0  
 SWH 8012.820 Hz  
 FIDRES 0.668735 Hz  
 AQ 1.4998465 sec  
 RG 57  
 DW 62.400 usec  
 DE 6.50 usec  
 TE 300.0 K  
 D1 1.00000000 sec  
 TDO 1  
 SFO1 400.1024006 MHz  
 NUC1 1H  
 FO 6.00 usec  
 F1 18.00 usec  
 PLW1 10.00000000 W

F2 - Processing parameters  
 SI 16384  
 SF 400.1000139 MHz  
 WDW EM  
 SSB 0  
 LB 0 Hz  
 GB 0  
 PC 1.00

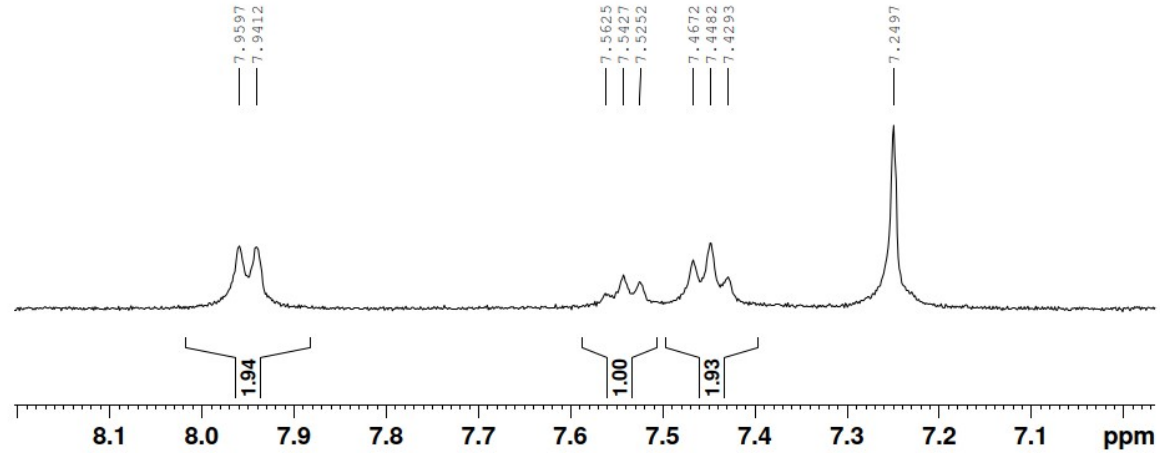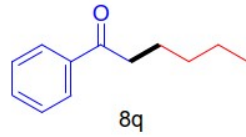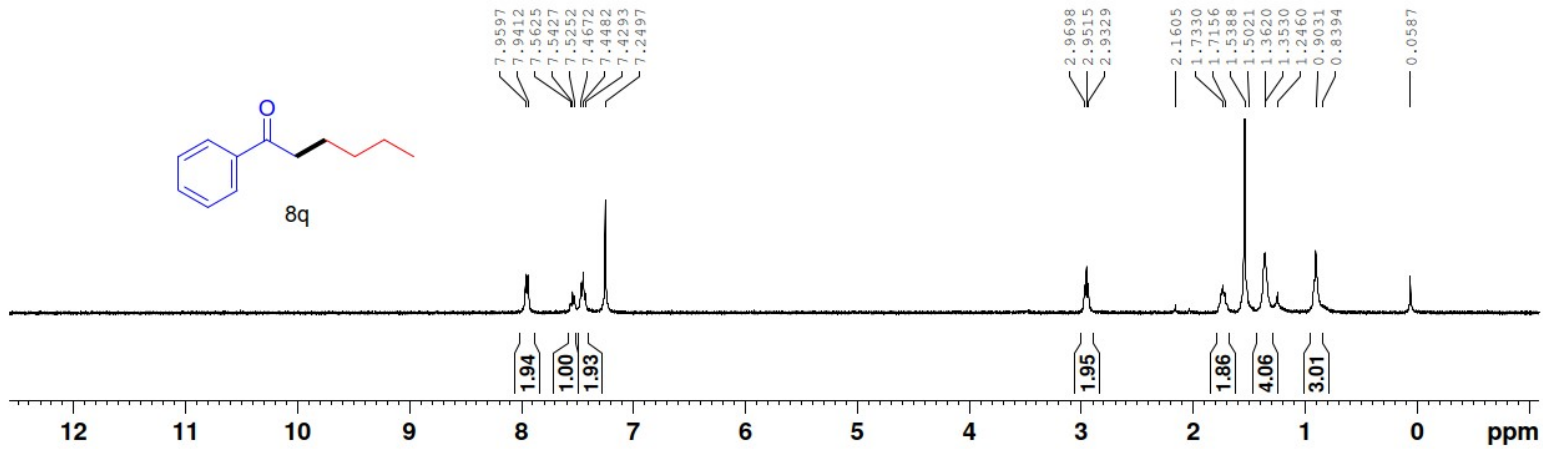

8r IN CDC13

Current Data Parameters  
NAME 8r  
EXPNO 10  
PROCNO 1  
F2 - Acquisition Parameters  
Date\_ 20220307  
Time 15.43 h  
INSTRUM spect  
PROBHD 25246\_0048 (1H)  
PULPROG zg30  
TD 24634  
FIDRES 0.466735 Hz  
AQ 1.4998465 sec  
RG 203  
SW 62.400 usec  
DE 6.50 usec  
TE 300.0 K  
SI 1.00000000 sec  
TD0 1  
SFO1 400.1024066 MHz  
MDC1 18  
PC 18.00 usec  
PLW1 10.00000000 W  
F2 - Processing parameters  
SI 16384  
SF 400.1000139 MHz  
WDW EM  
SSB 0  
LB 0 Hz  
GB 0  
PC 1.00

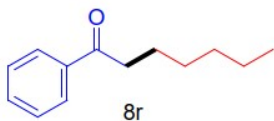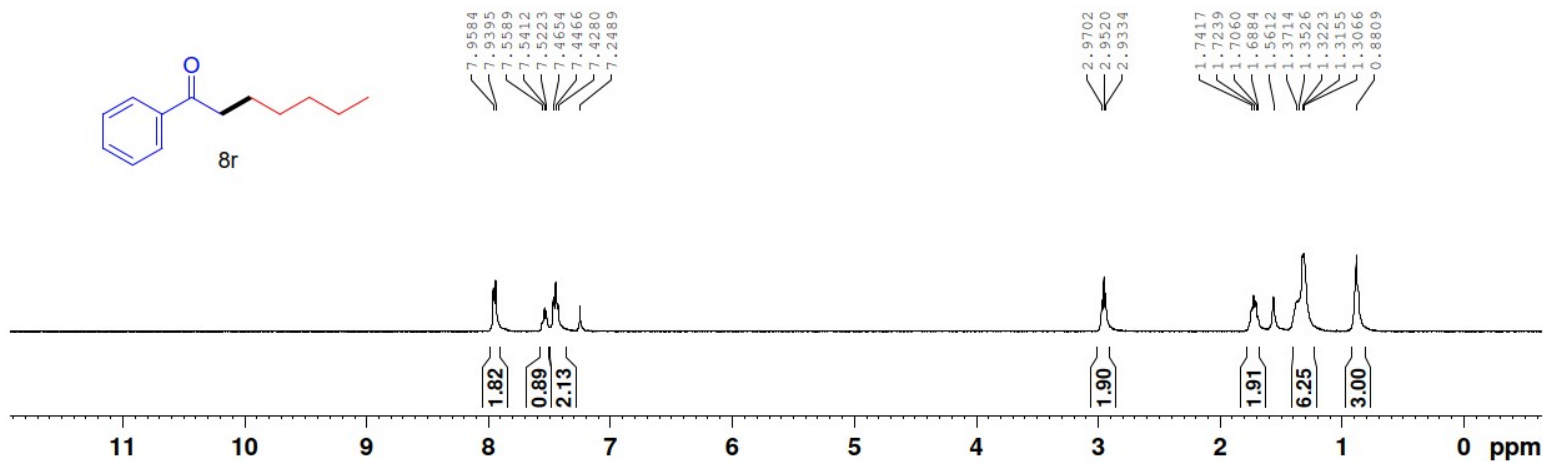

8s IN MeOD

Current Data Parameters  
 NAME 8s  
 EXPRO 10  
 PROCNO 1

F2 - Acquisition Parameters  
 Date\_ 20230515  
 Time 7.39 h  
 INSTRUM Avance  
 PROBHD Z163739\_0713 (4  
 PULPROG zg30  
 TD 24576  
 SOLVENT MeOD  
 NS 8  
 DS 0  
 SWH 8196.721 Hz  
 FIDRES 0.467051 Hz  
 AQ 1.4591360 sec  
 RG 101  
 DW 61.000 usec  
 DE 13.89 usec  
 TE 298.2 K  
 D1 1.00000000 sec  
 TD0 1  
 SFO1 400.6024737 MHz  
 NUC1 1H  
 P0 2.67 usec  
 P1 8.00 usec  
 PLW1 24.03499985 W

F2 - Processing parameters  
 SI 65536  
 SF 400.6000122 MHz  
 MDW 2M  
 SSB 0  
 LB 0.30 Hz  
 GB 0  
 PC 1.00

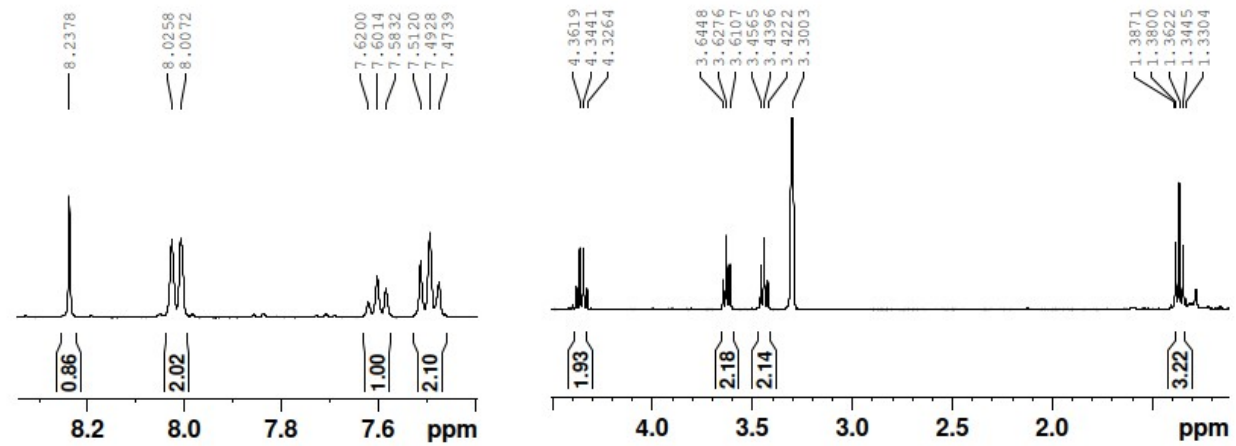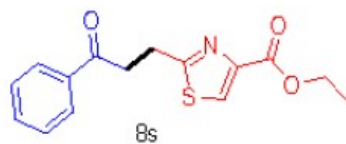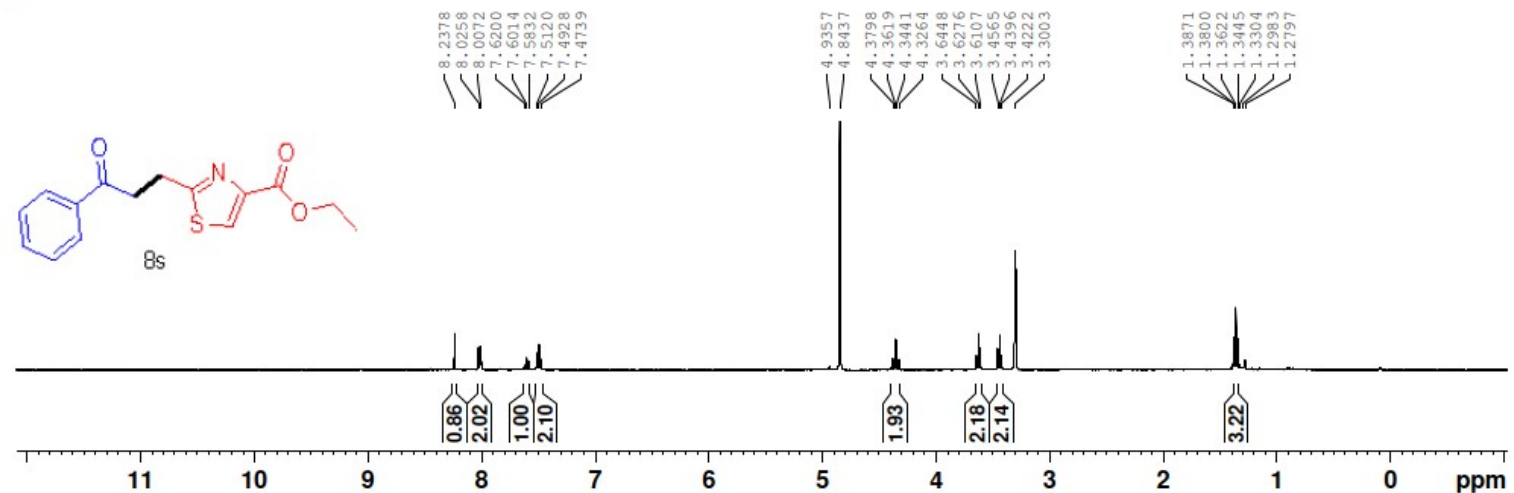



```

Current Data Parameters
NAME      8s
EXPNO     1
PROCNO    1

F2 - Acquisition Parameters
Date_     20220517
Time      9.22 h
INSTRUM   spect
PROBHD    zgpg30_5162 1
PULPROG   zgpg30
TD         65536
SOLVENT   CDCl3
NS         2000
DS         4
SWH        25292.528 Hz
FIDRES     0.770644 Hz
AQ         1.2876128 sec
RG          258.8
DE         19.200 umm
TE         300.2 K
D1         2.00000000 sec
d11        0.02000000 sec
TDS        1
SFO1       100.625188 MHz
NUC1        13C
P1          2.07 umm
PL1         0.00 umm
SFO2       80.6489982 MHz
SFO3       400.1418152 MHz
NUC2        1H
CPDPRG2   waltz16
PCPD2      90.00 umm
PUM2       23.4180021 W
PAM2       0.1850200 W
PAM3       0.0925100 W

F2 - Processing parameters
SI         32768
SF          100.625188 MHz
WDW         EM
SSB         0
LB          1.00 Hz
GB          0
PC          1.00
  
```

8s IN CDCl3-13C

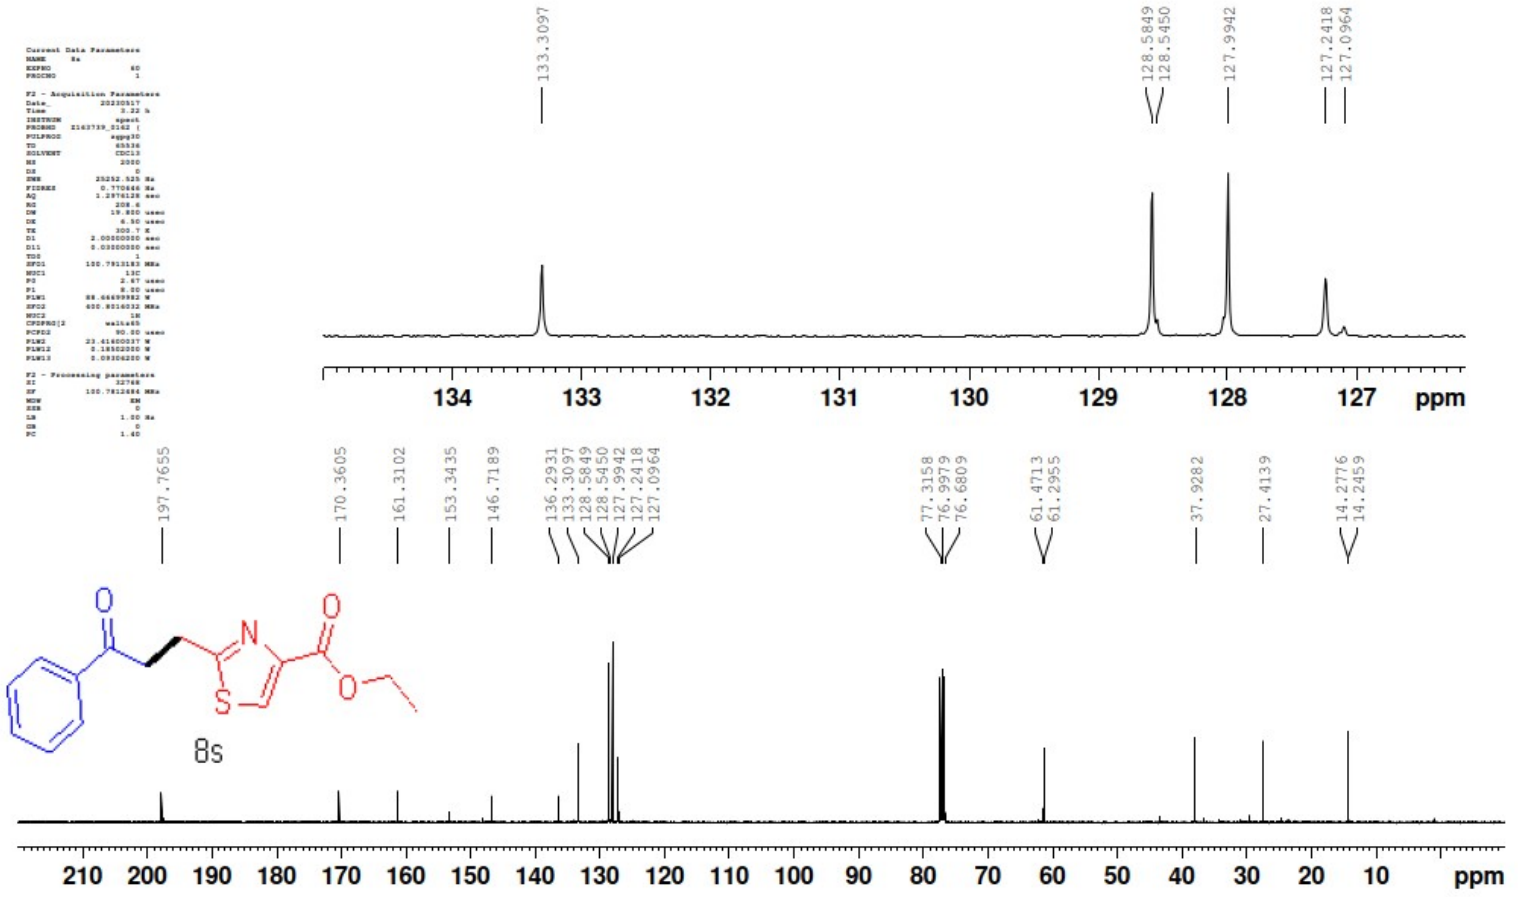

8s IN CDC13-APT

```

Current Data Parameters
NAME      8s
EXPNO    41
PROCNO   1

F2 - Acquisition Parameters
Date_    20230517
Time     5.13 h
INSTRUM  spect
PROCNO   2143739_0162 (
PULPROG  zgpg30
TD        65536
SOLVENT  CDCl3
NS        2000
DS        0
SWH       25252.122 Hz
FIDRES   0.770446 Hz
AQ        1.2976128 sec
RG        298.6
DM        19.800 usec
DE        6.50 usec
TE        298.2 K
CHRG1    149.000000
CHRG2    1.00000000
D1        2.00000000 sec
D2        0.00489455 sec
TDC       1
SFO1     100.7813183 MHz
NUC1      13C
P1        8.00 usec
P2        16.00 usec
PLW1     88.66699982 W
SFO2     400.8016032 MHz
NUC2      1H
CPDPRG2  waltz165
PCPD2    90.00 usec
PLW2     23.41600037 W
PLW12    0.18502000 W

F2 - Processing parameters
SI        32768
SF        100.7812489 MHz
WDW       EM
SSB       0
LB        1.00 Hz
GB        0
PC        1.40
  
```

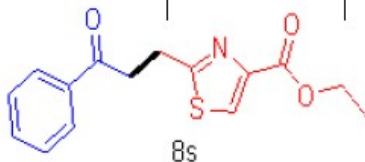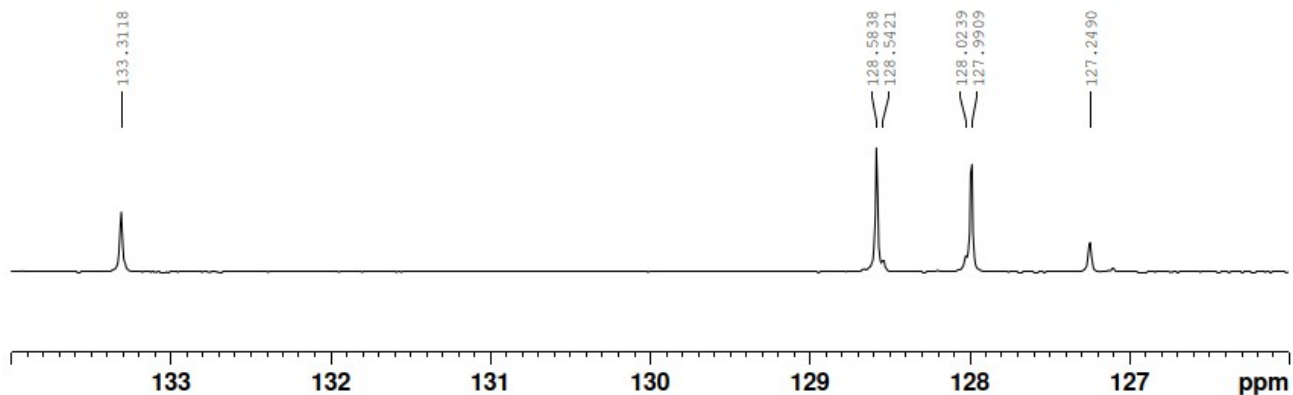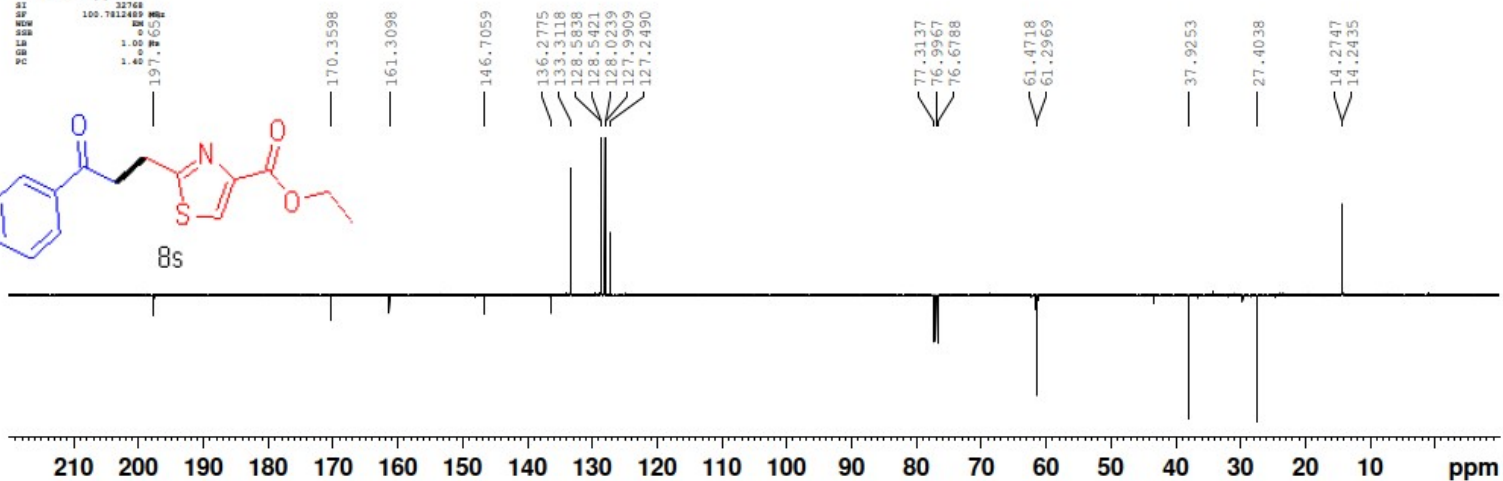

8s' IN DMSO

Current Data Parameters  
 NAME 8s'  
 EXPNO 10  
 PROCNO 1  
 F2 - Acquisition Parameters  
 Date\_ 20230517  
 Time 17.56 h  
 INSTRUM spect  
 PROBHD 5104450\_0773 (4  
 PULPROG zg30  
 TD 24256  
 FIDRES 0.1660  
 NS 16  
 DS 0  
 SWH 8012.820 Hz  
 FWHM 0.664735 Hz  
 AQ 1.4998465 sec  
 RG 10  
 DW 62.400 usec  
 DE 6.50 usec  
 TE 300.0 K  
 D1 1.0000000 sec  
 TSD 1  
 SFO 400.2324014 MHz  
 MOCL 1H  
 PC 4.79 usec  
 P1 14.38 usec  
 P2 19.18000031 W  
 F2 - Processing parameters  
 SI 14384  
 SF 400.2300031 MHz  
 NH 32  
 SH 0  
 LB 0.30 Hz  
 GB 0  
 PC 1.00

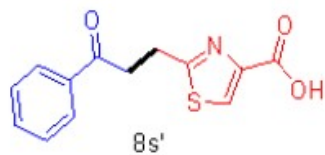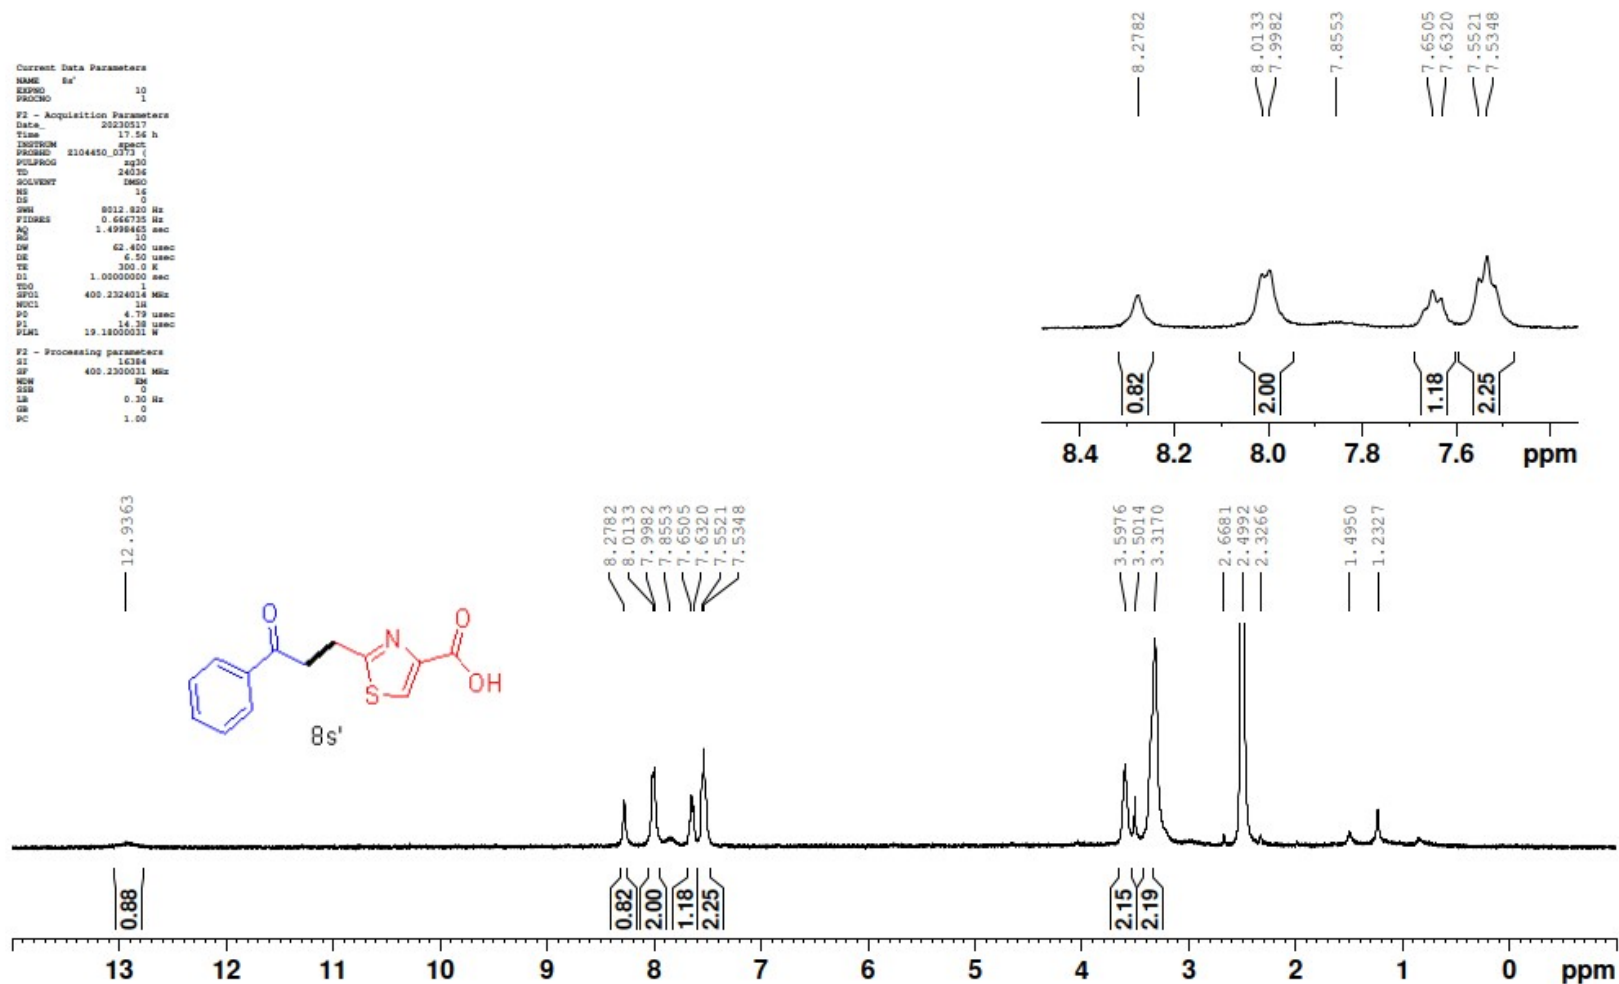

10aa IN DMSO

Current Data Parameters  
 NAME 10aa  
 KEXPNO 10  
 PROCNO 1  
 F2 - Acquisition Parameters  
 Date\_ 20230116  
 Time 19.31 h  
 INSTRUM spect  
 PROCNO 2163739\_0162 (1  
 PULPROG zgpg  
 TD 26226  
 SOLVENT DMSO  
 NS 8  
 DS 0  
 SWH 8012.820 Hz  
 FIDRES 0.366730 Hz  
 AQ 1.4998460 sec  
 RG 19.9  
 DW 62.400 usec  
 DE 18.11 usec  
 TE 296.6 K  
 D1 0 sec  
 TDS 1  
 SFO1 400.1724710 MHz  
 NUC1 1H  
 P2 2.67 usec  
 P1 8.00 usec  
 PLW1 21.73299971 M  
 F2 - Processing parameters  
 SI 16384  
 SF 400.1700000 MHz  
 KW 2K  
 SSB 0  
 LB 0.60 Hz  
 GB 0  
 PC 1.00

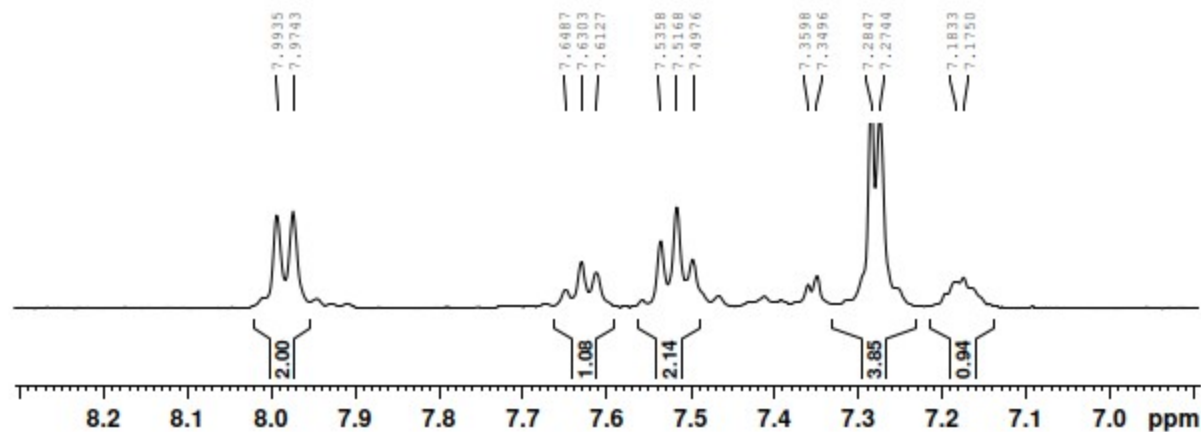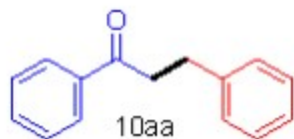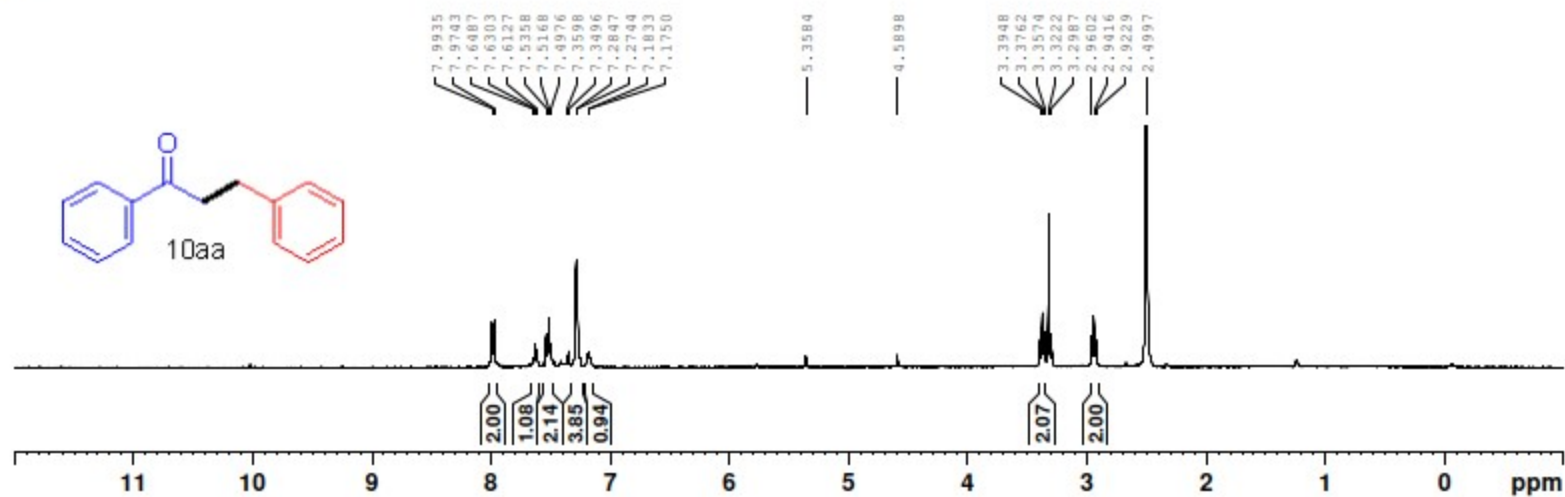

10ab IN MeOD

Current Data Parameters  
 NAME 10ab  
 EXPNO 12  
 PROCNO 1  
 F2 - Acquisition Parameters  
 Date\_ 20230123  
 Time 12.21 h  
 INSTRUM spect  
 PROCNO 2106650\_0713\_1  
 PULPROG zg30  
 TD 32768  
 SOLVENT MeOD  
 NS 8  
 DS 4  
 SFO 8012.820 MHz  
 FIDRES 0.666733 MHz  
 AQ 1.4998660 sec  
 RG 64  
 CM 62.400 umax  
 DE 8.50 umax  
 TE 300.2 K  
 D1 1.00000000 sec  
 TD0 1  
 SFO1 600.2326016 MHz  
 NUC1 13C  
 P0 5.00 umax  
 F1 15.00 umax  
 FUEL 10.00000000 W  
 F2 - Processing parameters  
 SI 64384  
 SF 600.2300116 MHz  
 NCM 0  
 SUB 0  
 LB 0.30 MHz  
 GB 0  
 PC 1.00

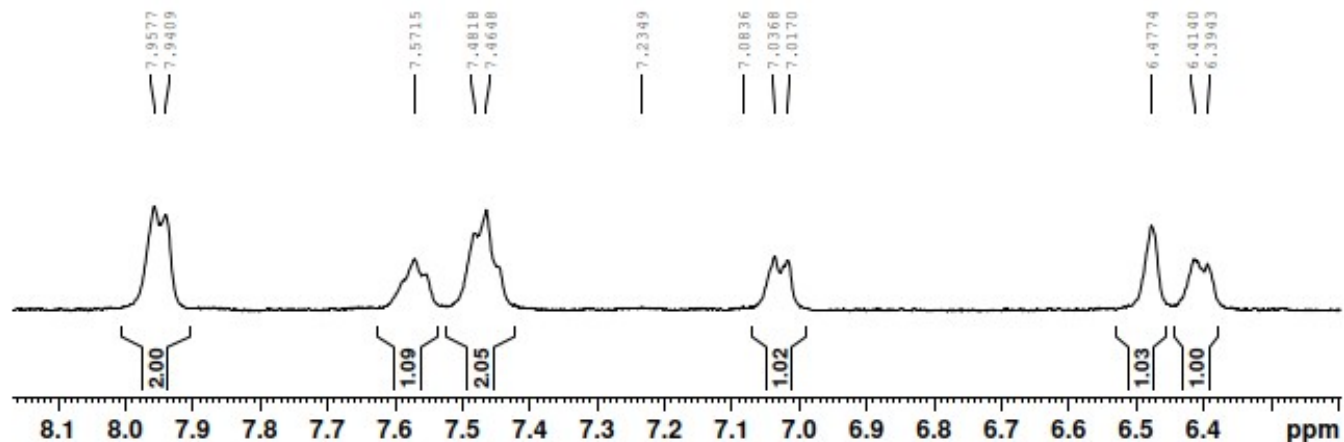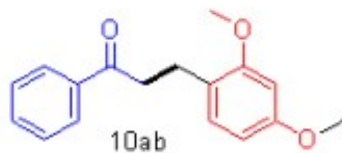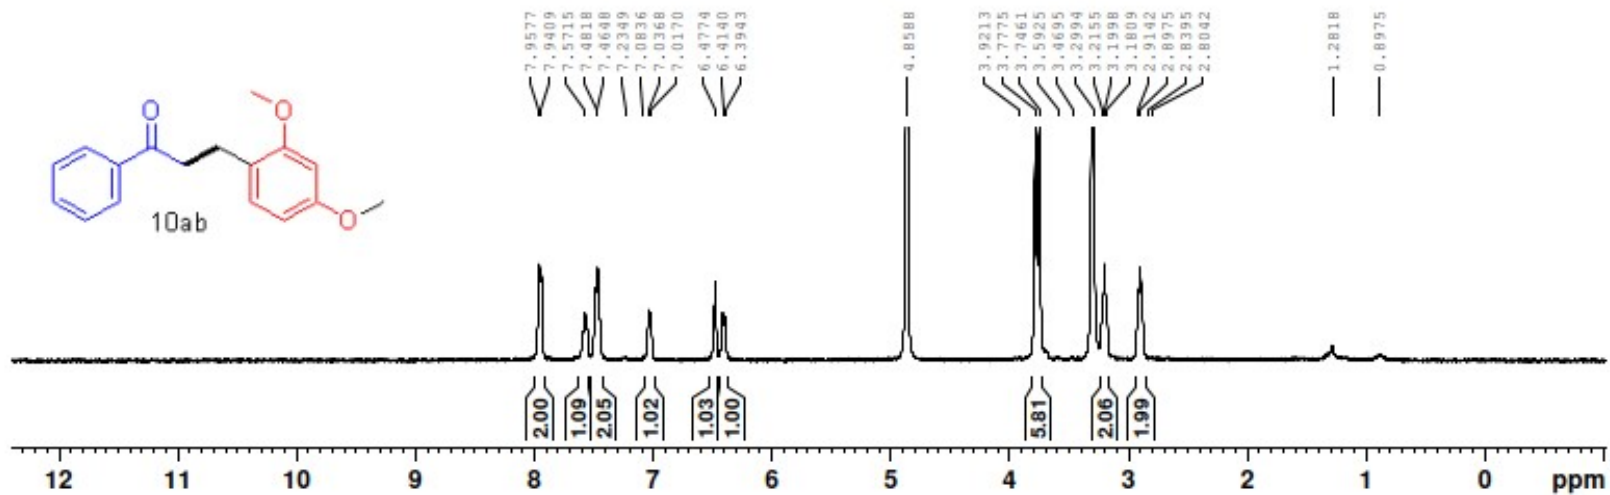

10ac IN MeOD

Current Data Parameters  
 NAME 10ac  
 EXPNO 10  
 PROCNO 1  
 F2 - Acquisition Parameters  
 Date\_ 20230201  
 Time 0.28 h  
 INSTRUM spect  
 PROBRW 2106650\_0373 ( )  
 PULPROG zgpg30  
 TD 32768  
 SOLVENT MeOD  
 NS 16  
 DS 2  
 SFO1 8012.820 MHz  
 FIDRES 0.466733 Hz  
 AQ 1.478465 sec  
 RG 37  
 DM 62.800 umm  
 DE 6.00 umm  
 TE 300.2 K  
 D1 0 sec  
 TSD 1  
 SF01 400.252616 MHz  
 NS1 16  
 DS1 2  
 P1 16.38 umm  
 PCPL1 19.18000001 W  
 F2 - Processing parameters  
 SI 16386  
 SF 400.250017 MHz  
 NS1 16  
 DS1 2  
 SFO1 0.00 Hz  
 LB 0  
 GB 0  
 PC 1.00

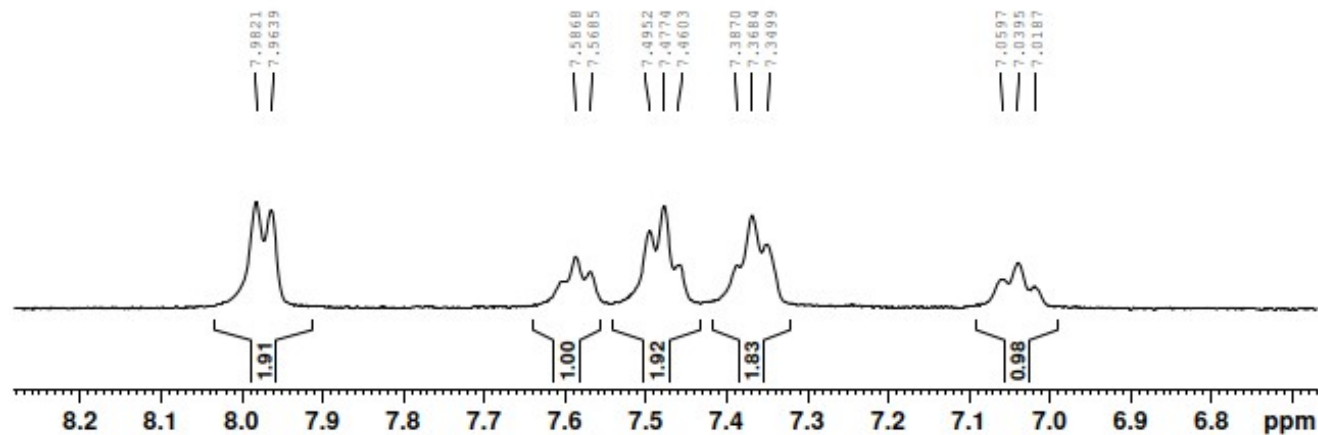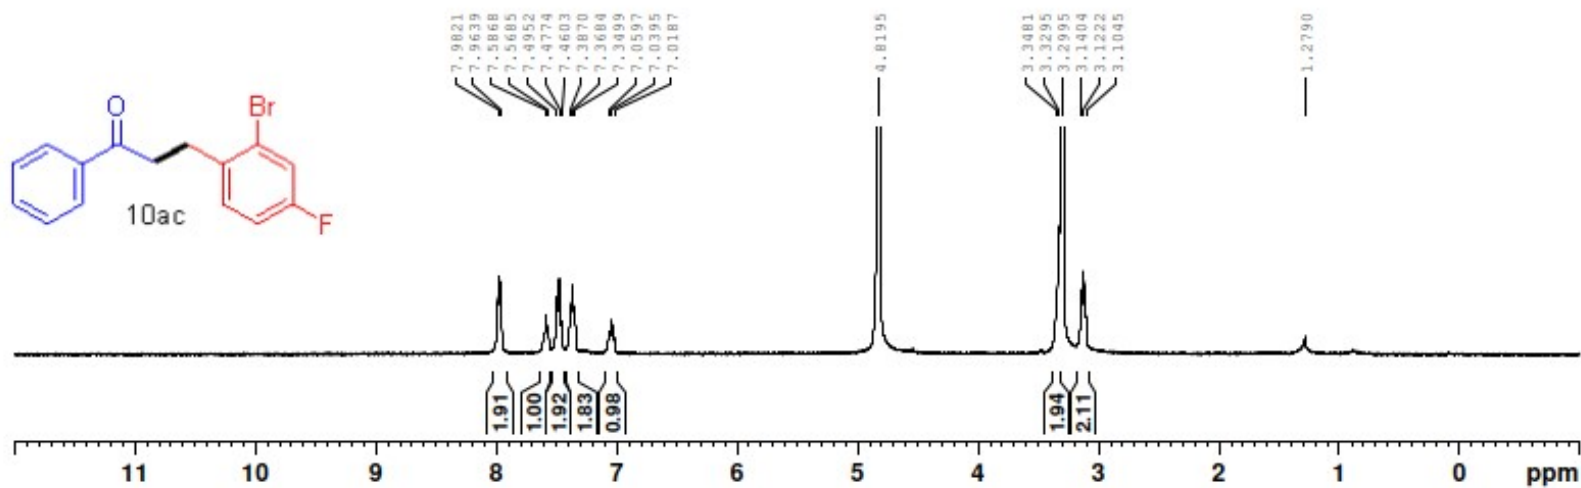

10ac IN CDCl3-13C

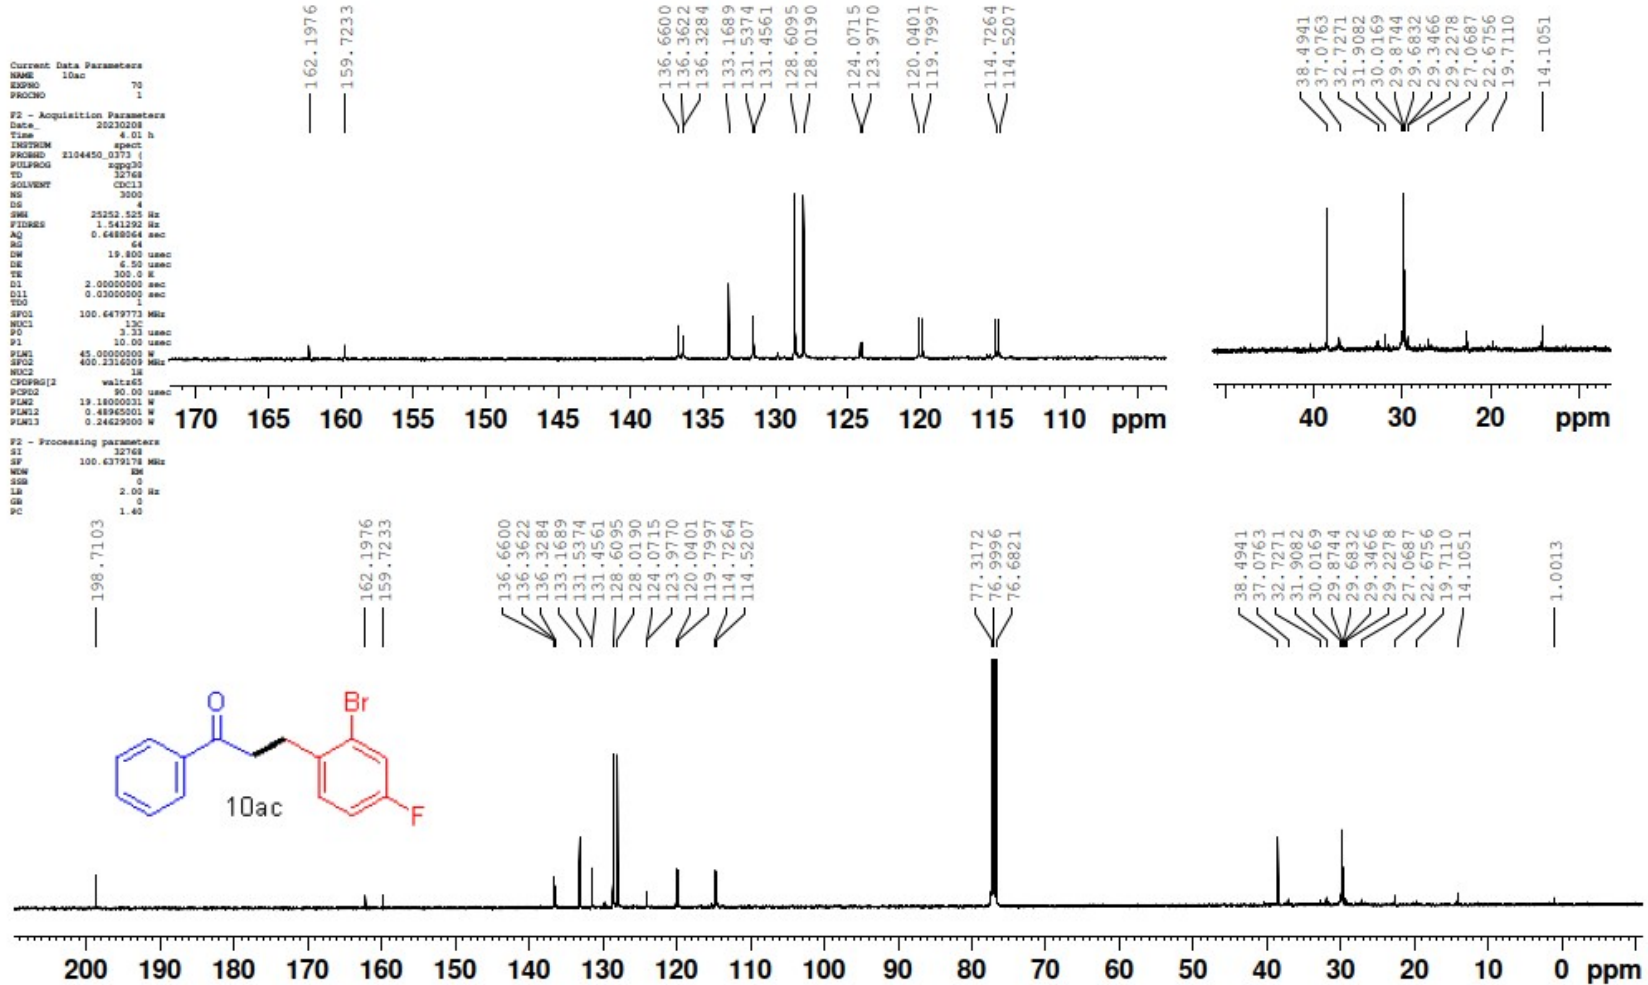

10ac IN CDCl3-APT

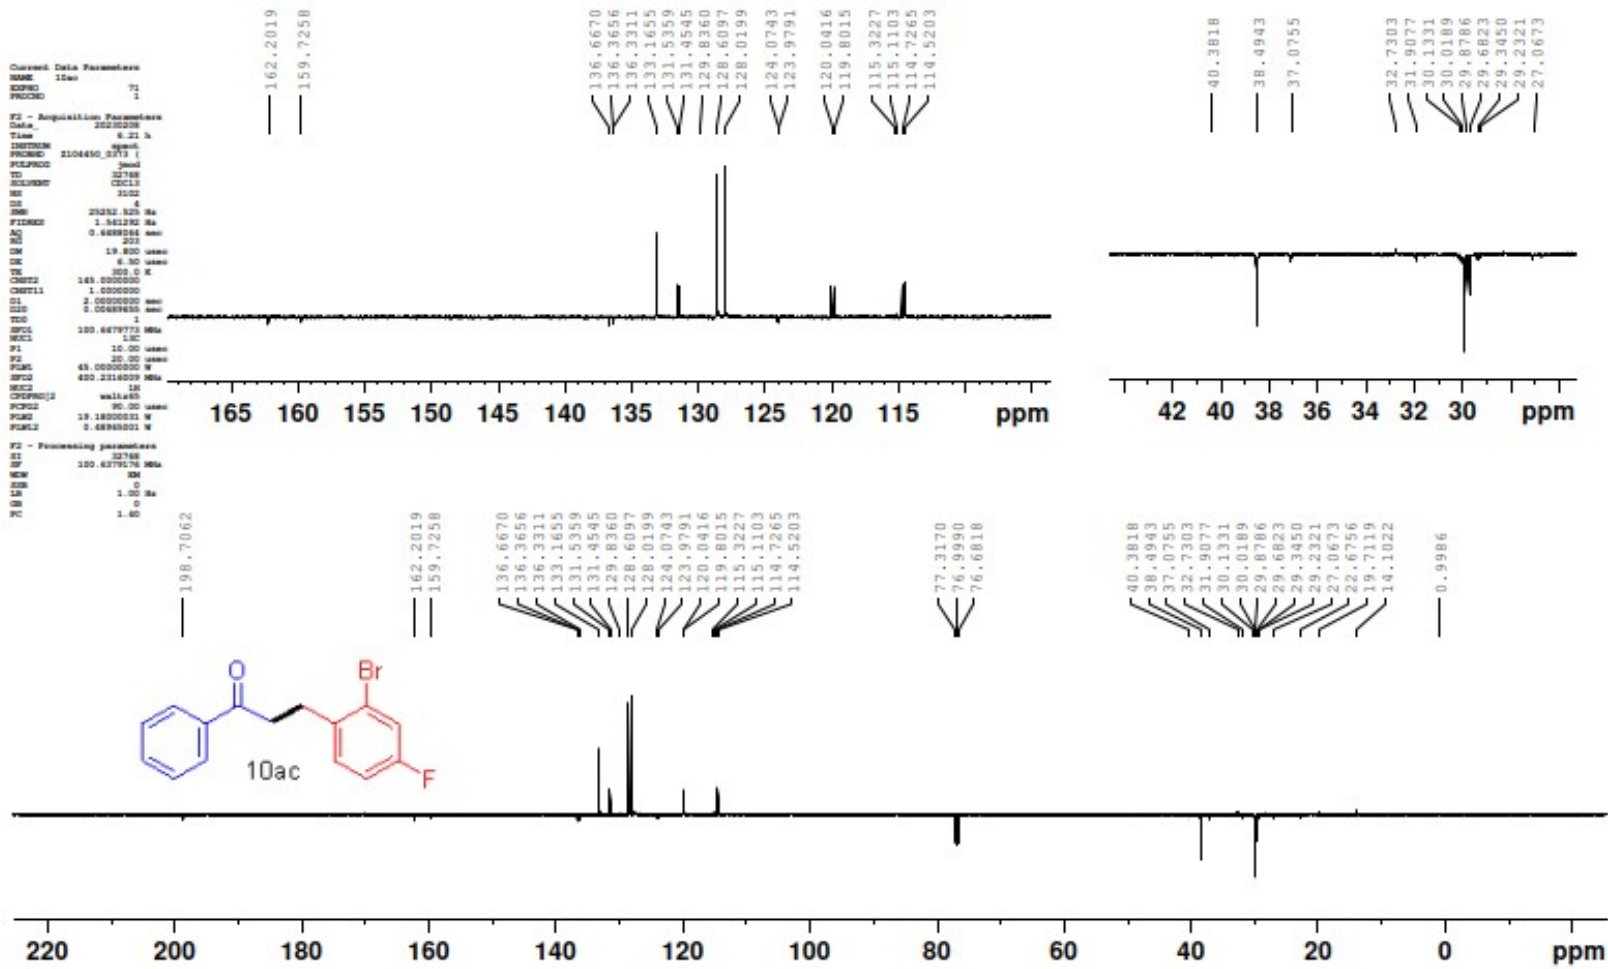



10ad IN CDCl3

Current Data Parameters  
 NAME 10ad  
 EXPNO 10  
 PROCNO 1  
 F2 - Acquisition Parameters  
 Date\_ 20230309  
 Time 21.10 h  
 INSTRUM spect  
 PROBRW 2106430.0373 ( MHz )  
 PULPROG zg30  
 TD 26226  
 SOLVENT CDCl3  
 NS 8  
 DS 0  
 SWH 8012.820 MHz  
 FREQZ 0.486733 MHz  
 AQ 1.4998163 sec  
 RG 82.3  
 DW 82.400 usec  
 DE 8.10 usec  
 TE 300.2 K  
 D1 0.000 sec  
 TDC 1  
 SFO1 400.2328014 MHz  
 NUC1 1H  
 PC 6.79 usec  
 FL1 13.18 usec  
 PL1 19.180000011 dB  
 F2 - Processing parameters  
 SI 16384  
 SF 400.2300176 MHz  
 MDW KM  
 SIK 0  
 LR 0.10 MHz  
 GR 0  
 PR 1.00

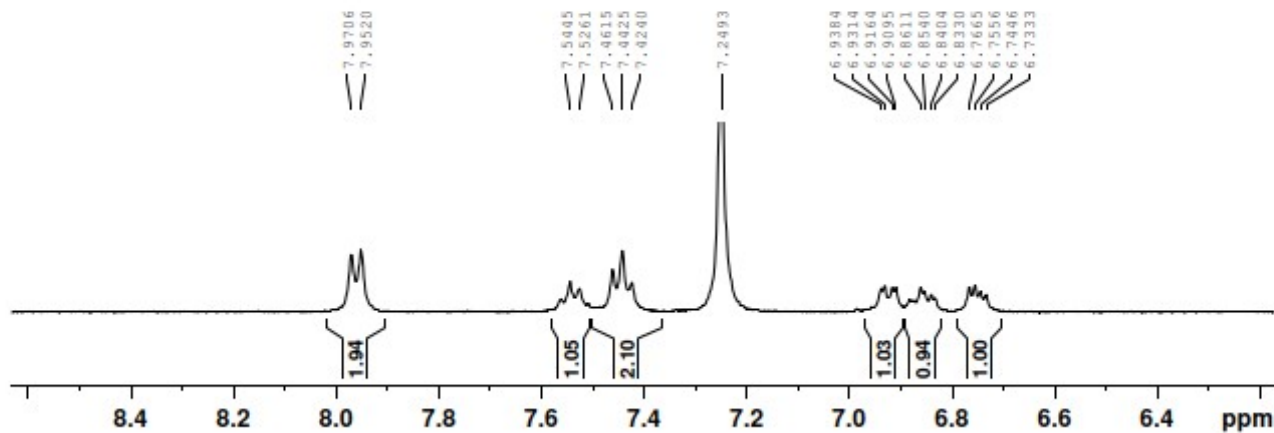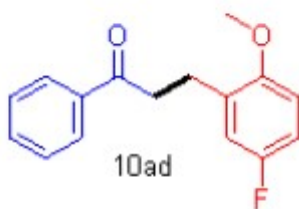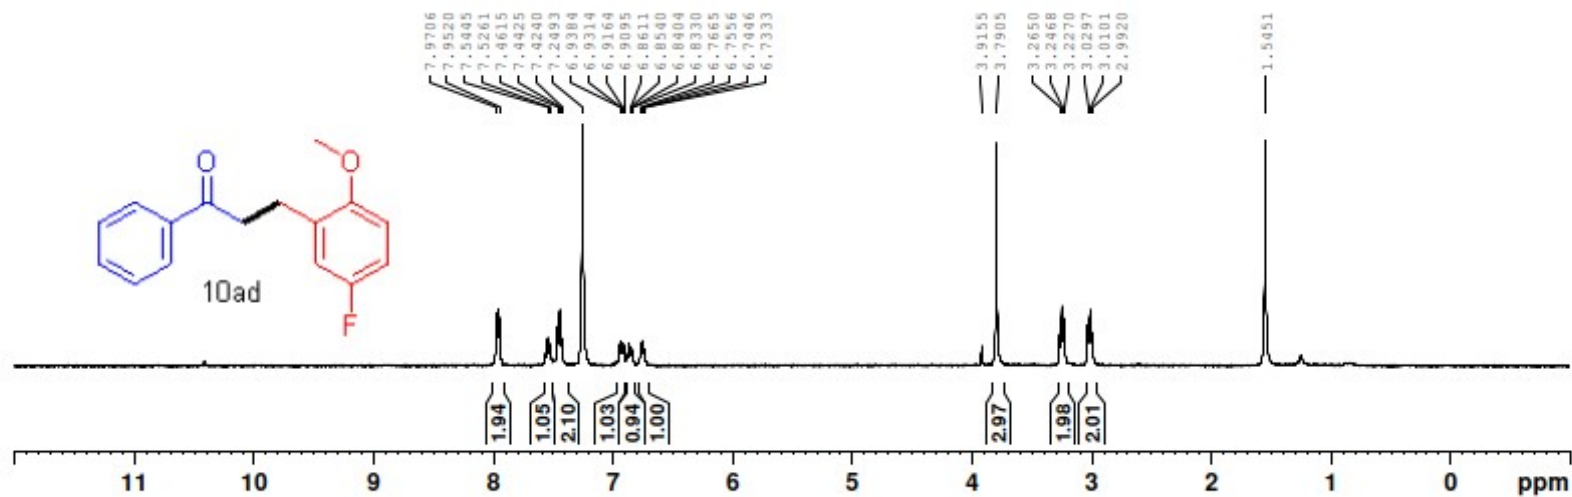

10ad IN MeOD

Current Data Parameters  
 NAME 10ad  
 EXPNO 10  
 PROCNO 1  
 F2 - Acquisition Parameters  
 Date\_ 20230201  
 Time 22:19 h  
 INSTRUM spect  
 FREQID 210860\_073 C  
 PULPROG zg30  
 TD 26288  
 SOLVENT MeOD  
 NS 8  
 DS 0  
 SWH 8012.820 Hz  
 FIDRES 0.466733 Hz  
 AQ 1.4998668 sec  
 RG 225  
 CW 62.600 usec  
 CK 8.50 usec  
 TR 320.0 Hz  
 D1 1.0000000 sec  
 YD0 1  
 SFO1 600.212614 MHz  
 NSCL 18  
 PD 4.79 usec  
 P1 14.38 usec  
 PGM1 19.18000011 W  
 F2 - Processing parameters  
 SI 14284  
 SF 600.2100114 MHz  
 MN 306  
 NR 0  
 LB 0.30 Hz  
 GB 0  
 PC 1.00

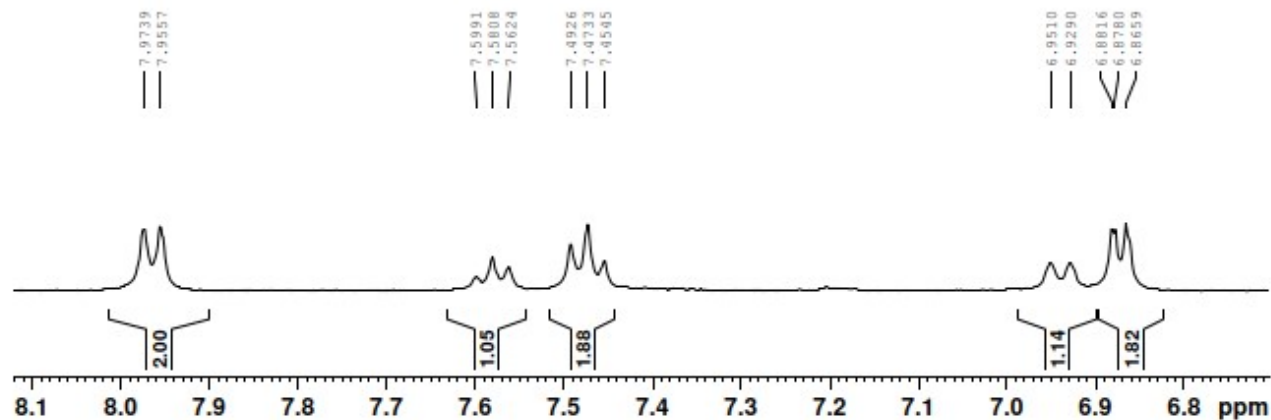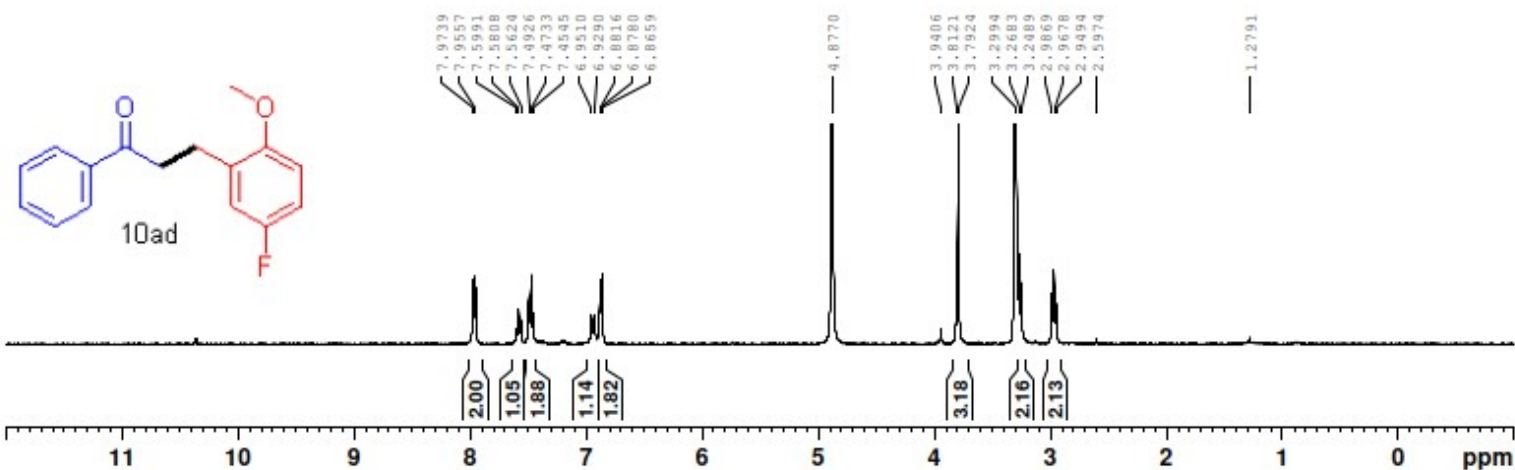

Current Data Parameters  
 NAME 10ad  
 EXPNO 60  
 PROCNO 1  
 F2 - Acquisition Parameters  
 Date\_ 20230310  
 Time 13.36 h  
 INSTRUM Avance Neo  
 PROCNO 216779\_0444\_1  
 F2FREQ 400.136300  
 TD 24576  
 SFOREQ 100.628151  
 AQ 4.00  
 DS 4  
 SWH 2389.323 Hz  
 FIDRES 1.87624 Hz  
 AQ 0.314080 sec  
 SI 101  
 SF 21.000 MHz  
 DE 6.50 MHz  
 VE 298.1 K  
 SI 2.000000 sec  
 SI1 0.0300000 sec  
 TSD 1  
 SFO1 100.628151 MHz  
 PC1 LSC  
 PD 2.57 MHz  
 P1 8.00 MHz  
 P2 80.7820004 W  
 P3 80.7820004 W  
 P4 18  
 CPDPRG2 waltz16  
 PCPD 80.00 MHz  
 P2 21.41000043 W  
 P3 0.17075001 W  
 P4 0.08368400 W  
 F2 - Processing parameters  
 SI 32768  
 SF 100.628151 MHz  
 DS 4  
 SW 2.00 MHz  
 SI 0  
 SF 1.80

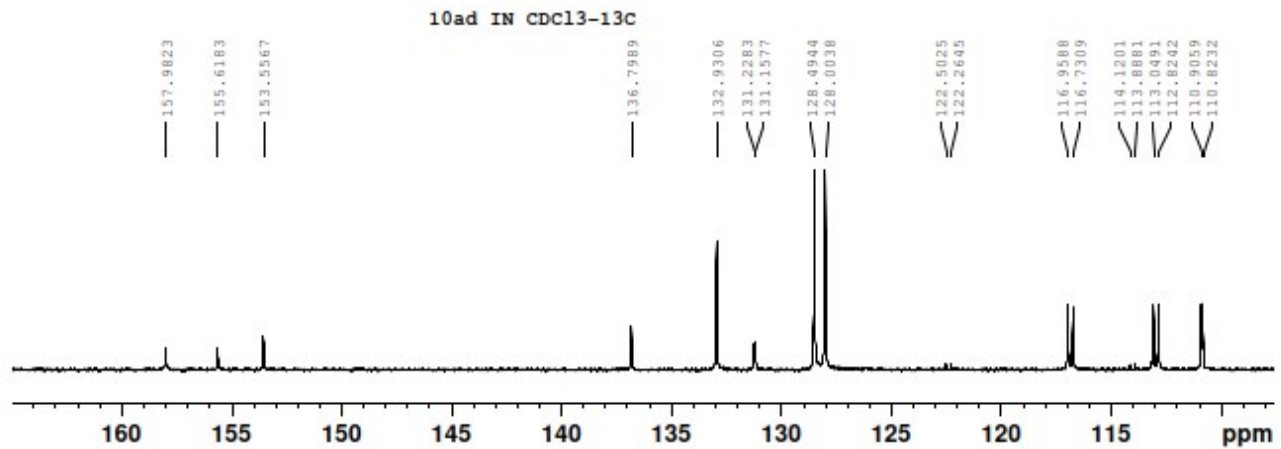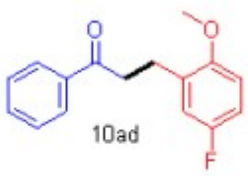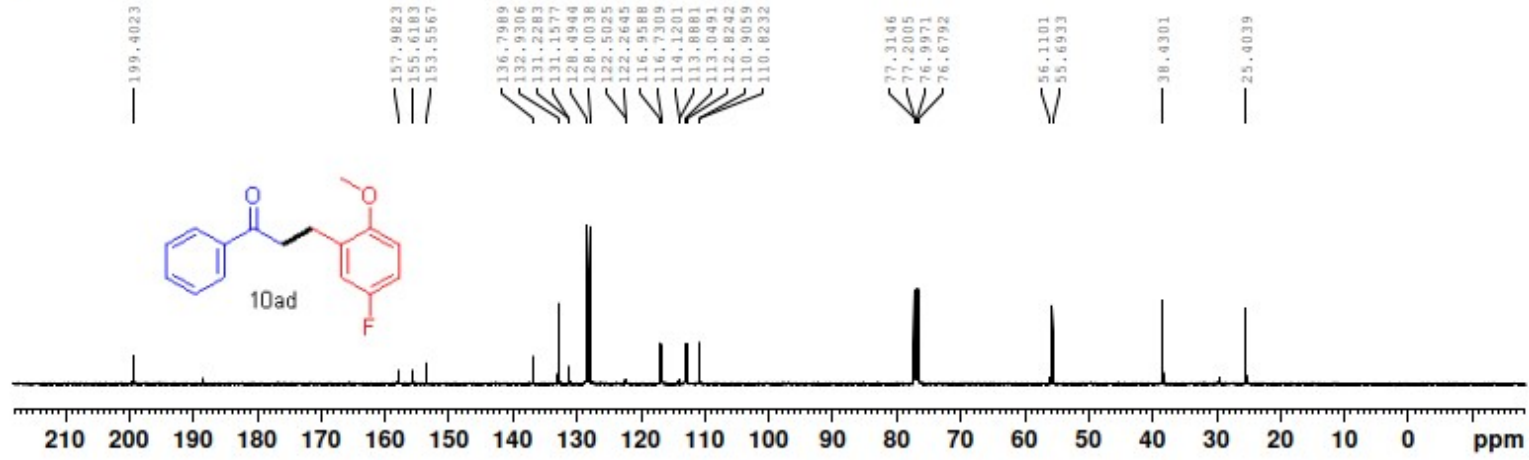

Current Data Parameters  
 NAME 10ad  
 EXPNO 41  
 PROCNO 1  
 F2 - Acquisition Parameters  
 Date\_ 20220310  
 Time 14:13 h  
 INSTRUM Avance Neo  
 PROCNO 1167739\_0446 ( )  
 PULPROG zmg30  
 TD 26574  
 SOLVENT CDCl3  
 NS 404  
 DS 4  
 SWH 23809.523 Hz  
 FIDRES 1.927428 Hz  
 AQ 0.5140363 sec  
 RG 101  
 SW 21.000 usec  
 SE 6.50 usec  
 TR 238.2 s  
 CMT2 145.0000000  
 CMT11 1.0000000  
 D3 2.0000000 sec  
 D30 0.006894501 sec  
 ZG0 1  
 SFO1 100.676101 MHz  
 NUC1 13C  
 P1 8.00 usec  
 P2 14.00 usec  
 PL1 95.74200104 W  
 PL2 400.32100113 MHz  
 PL3 18  
 CDEPRG2 waltz16  
 SFO2 400.0000000 MHz  
 PL4 21.61000001 W  
 PL5 0.17075028 W  
 F2 - Processing parameters  
 SI 32768  
 SF 100.6405221 MHz  
 NUX 66  
 SSB 0  
 LB 2.00 Hz  
 GB 0  
 PC 1.40

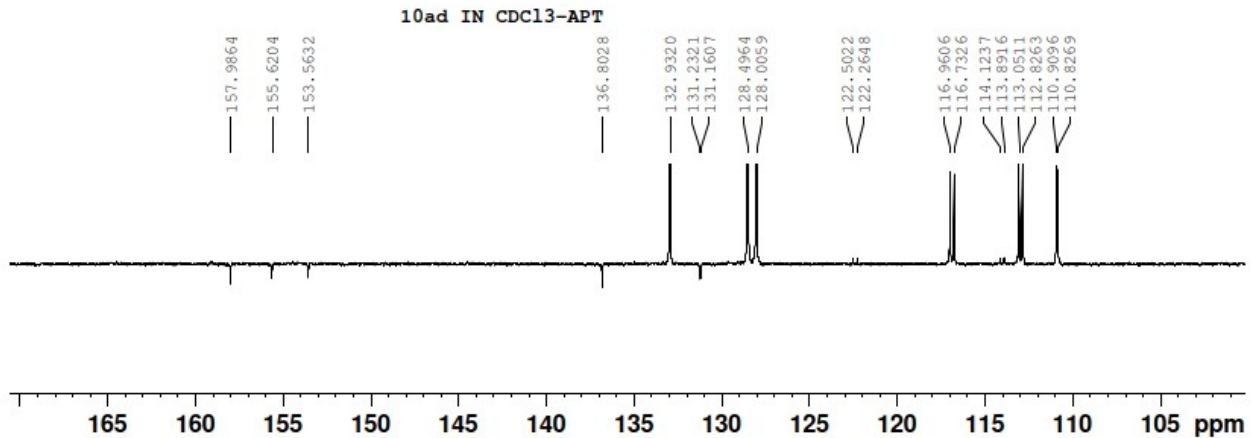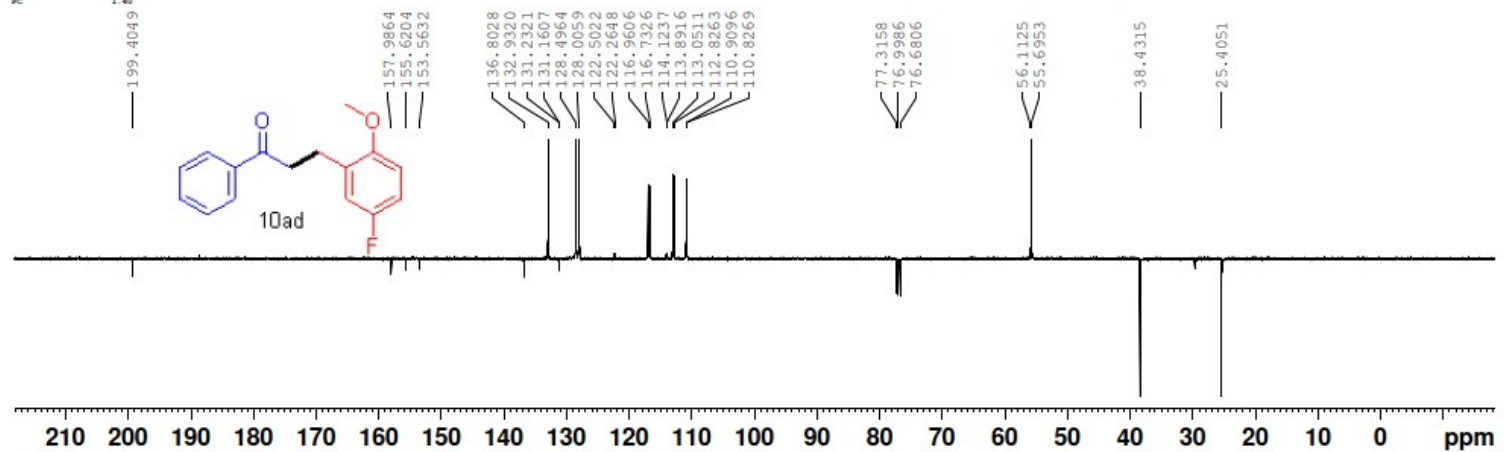

10ae IN MeOD

```

Current Data Parameters
NAME      10ae
EXPNO    10
PROCNO   1

F2 - Acquisition Parameters
Date_    20230202
Time     16.51 h
INSTRUM  spect
PROBHD   z163739_0162 (
PULPROG  zg30
TD       24636
SOLVENT  MeOD
NS       8
DS       0
SWH      8012.820 Hz
FIDRES   0.646735 Hz
AQ       1.4998465 sec
RG       39.54
DM       62.400 usec
DE       18.11 usec
TE       298.3 K
D1       0 sec
TDO      1
SFO1     400.1724710 MHz
NUC1     1H
PQ       2.67 usec
PI       8.50 usec
PLM1     21.75399971 W

F2 - Processing parameters
SI       16384
SF       400.1700119 MHz
WDW      EM
SSB      0
LB       0.60 Hz
GB       0
PC       1.00
    
```

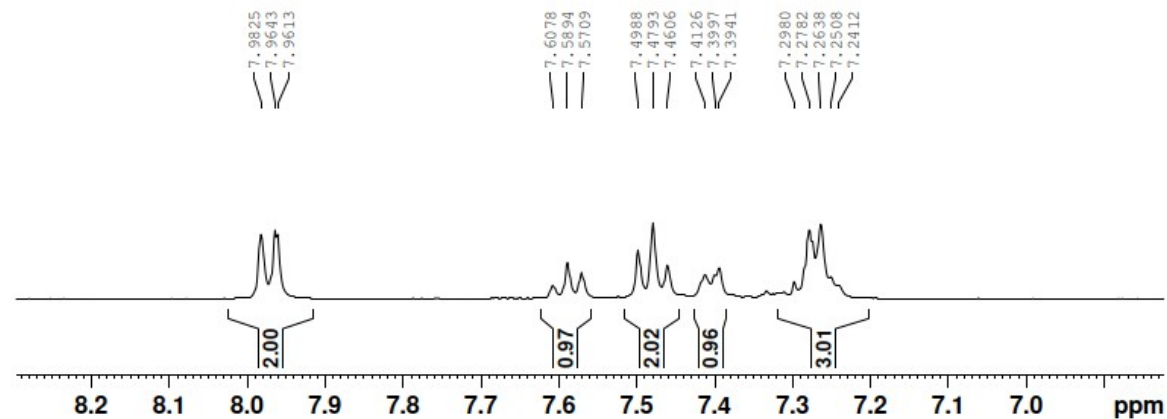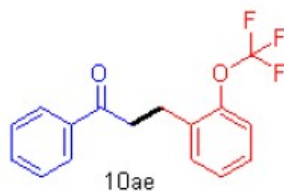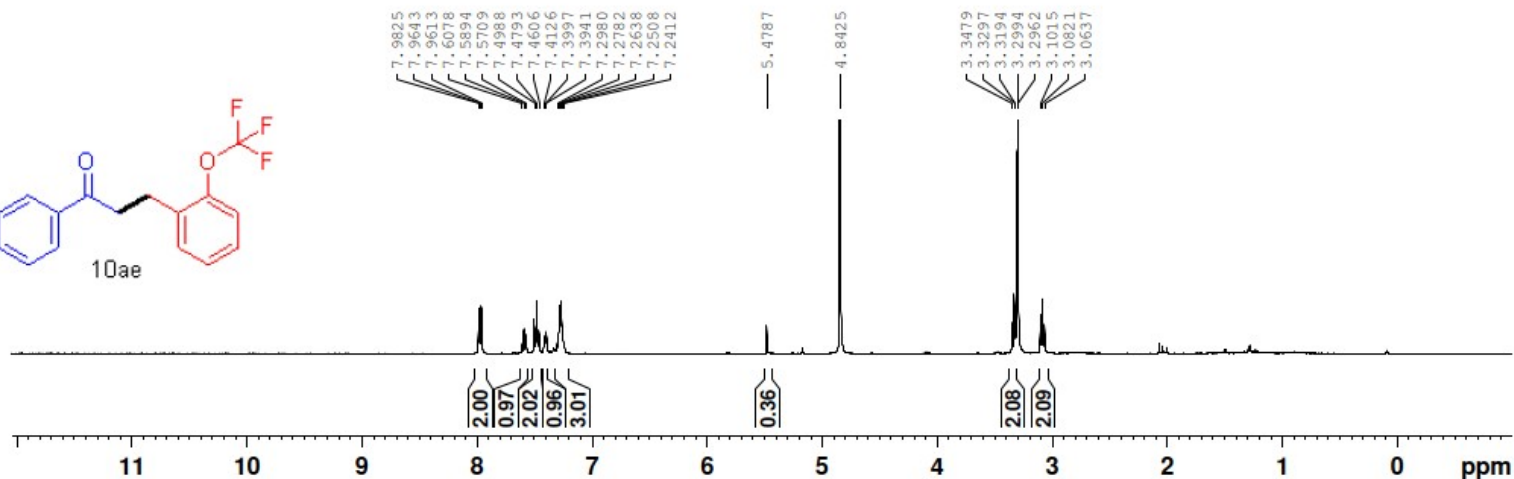

10ae IN CDCl3-13C

```

Current Data Parameters
NAME 10ae
EXPNO 60
PROCNO 1

F2 - Acquisition Parameters
Data
Time 8.26 h
INSTRUM Avance
PROBHD E163739_0713 (
PULPROG zgpg30
TD 6536
SOLVENT CDCl3
NS 2000
DS 4
SWH 23809.524 Hz
FIDRES 0.726099 Hz
AQ 1.3762560 sec
RG 101
DW 21.000 usec
DE 6.50 usec
TE 298.1 K
D1 2.0000000 sec
D11 0.0300000 sec
TDO 1
SFO1 100.7410232 MHz
NUC1 13C
P0 2.67 usec
P1 8.00 usec
PLM1 95.0979997 W
SFO2 400.6016024 MHz
NUC2 1H
CDPFG2 wait65
DCFS2 90.00 usec
PLM2 24.03499985 W
PLM3 0.18273070 W
PLM3 0.09138465 W

F2 - Processing parameters
SI 32768
SF 100.7309541 MHz
WDW EM
SSB 0
LB 1.00 Hz
GB 0
PC 1.40
    
```

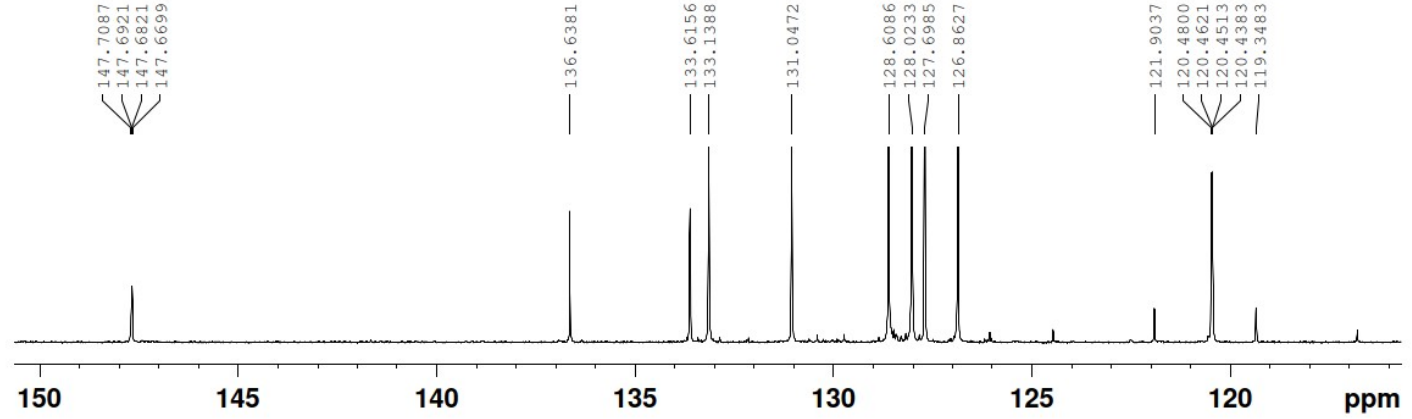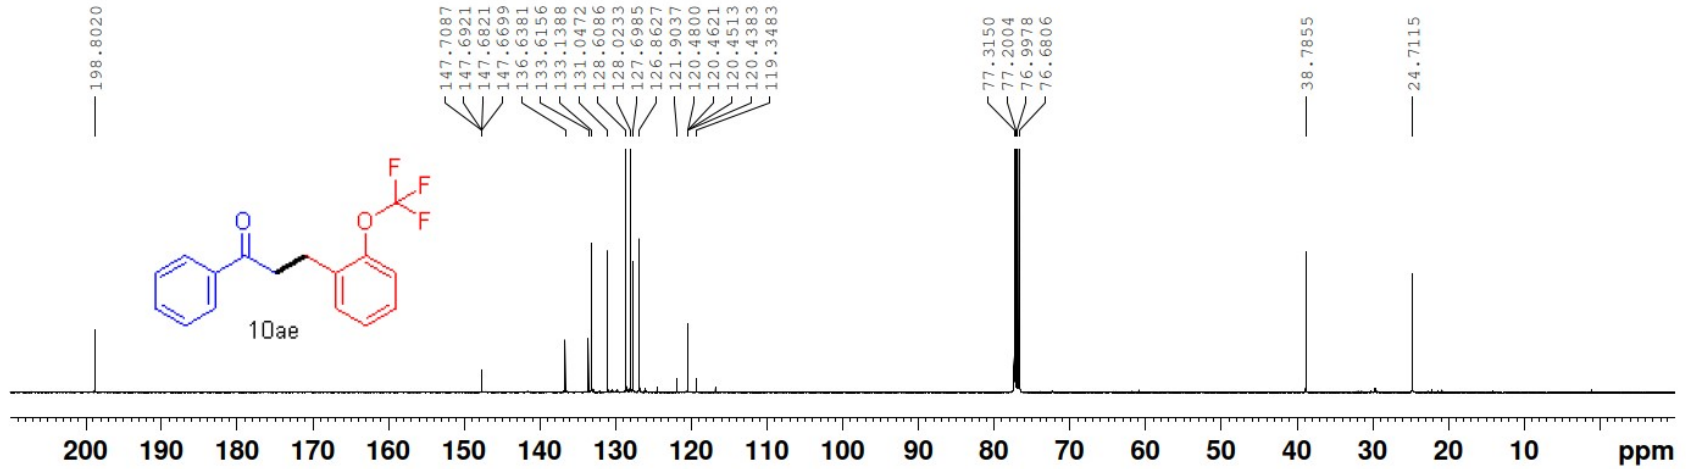

10ae IN CDCl3-APT

```

Current Data Parameters
NAME 10ae
EXPNO 1
PROCNO 1
F2 - Acquisition Parameters
Date_ 20230306
Time 2.37 h
INSTRUM Avance
PROBHD 1H313X_513 (
PULPROG zgpg30
TD 65536
SOLVENT CDCl3
NS 2000
DS 4
SWH 23809.624 Hz
FREQ0 0.126059 Hz
RG 1.0762560 mm
AQ 101
DE 21.100 udm
TE 300.2 K
SE 6.50 udm
CBST2 149.000000
CSTP1 1.000000
D1 2.0000000 s
D2 0.0500000 s
D3 0.0100000 s
YD0 100.741032 MHz
WDW1 1.0
SI 8.00 udm
F2 18.00 udm
RG1 35.0370907 W
SFO1 400.6014024 MHz
SFO2 100.6261250 MHz
CPDPRG12 hsq1d45
PCPD2 90.00 udm
PLG1 24.0389988 W
PLG2 0.1827070 W
F2 - Processing parameters
SI 32768
SF 100.6261250 MHz
WDW 1.0
SSB 0
LB 1.00 Hz
GB 0
PC 1.00
  
```

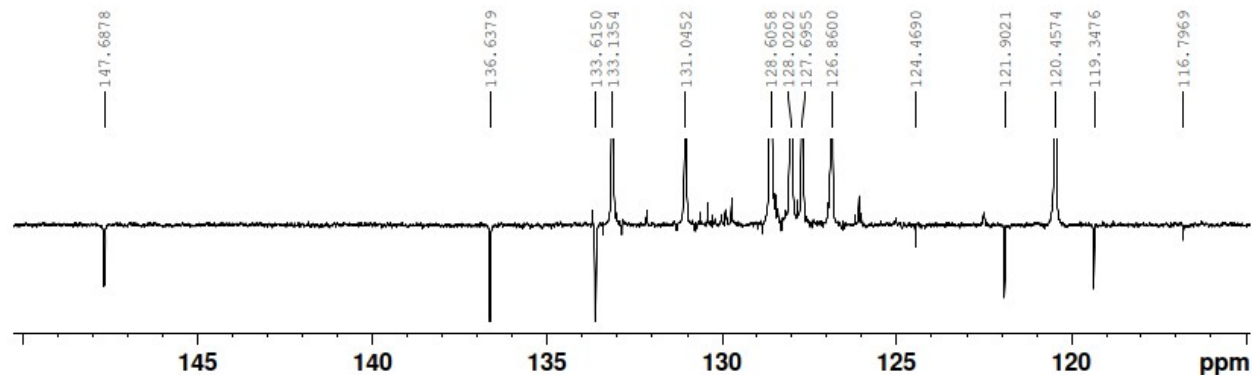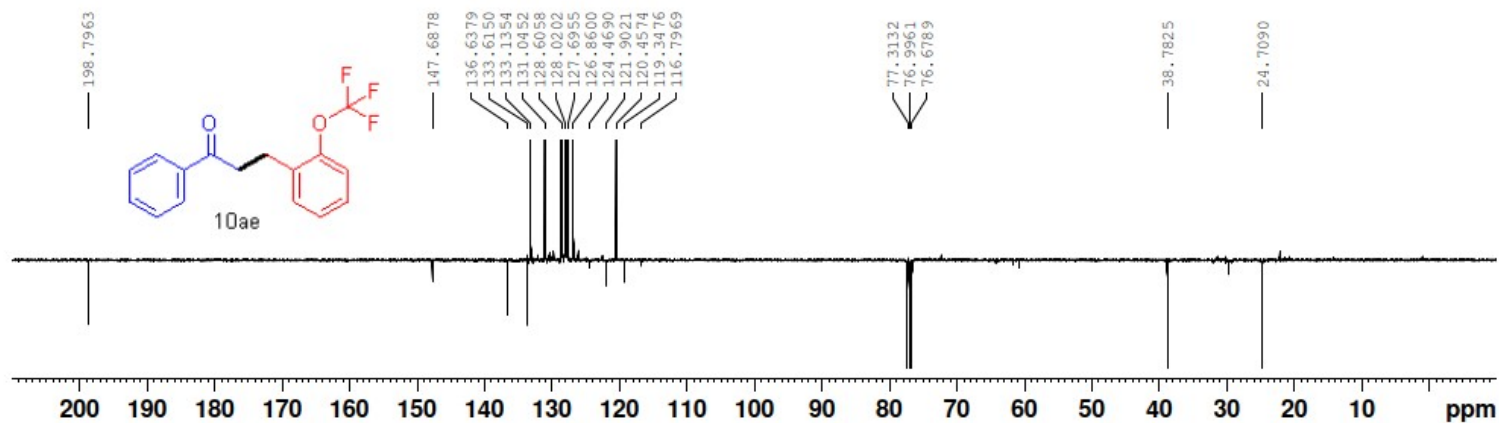

10af IN DMSO

Current Data Parameters  
 NAME 10af  
 EXPRO 10  
 PROCNO 1

F2 - Acquisition Parameters  
 Date\_ 20230203  
 Time 1.09 h  
 INSTRUM spect  
 PROBRD E104450\_0373 (   
 PULPROG zg30  
 TD 24036  
 SOLVENT DMSO  
 NS 8  
 DS 0  
 SWS 8012.820 Hz  
 FIDRES 0.666735 Hz  
 AQ 1.4998465 sec  
 RG 203  
 DW 62.400 usec  
 DE 6.50 usec  
 TE 300.0 K  
 EI 1.00000000 sec  
 TDO 1  
 SFO1 400.2324014 MHz  
 NUC1 1H  
 PC 4.79 usec  
 P1 14.38 usec  
 PL1 19.18000031 W

F2 - Processing parameters  
 SI 16384  
 SF 400.2300028 MHz  
 MW SW  
 SSB 0  
 LB 0.30 Hz  
 GB 0  
 PC 1.00

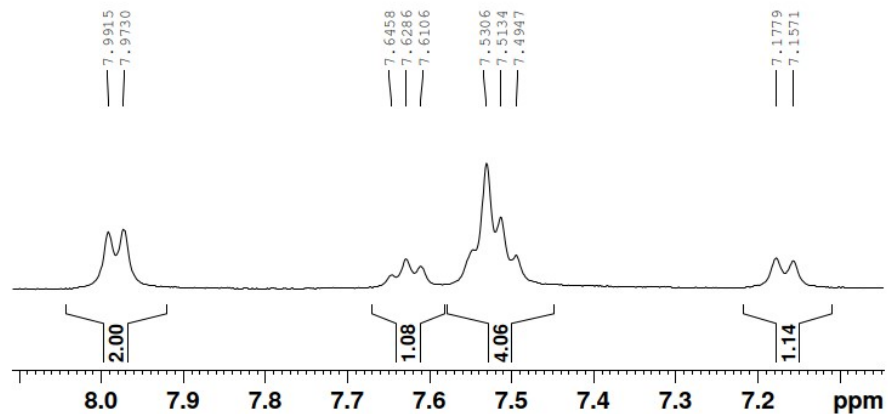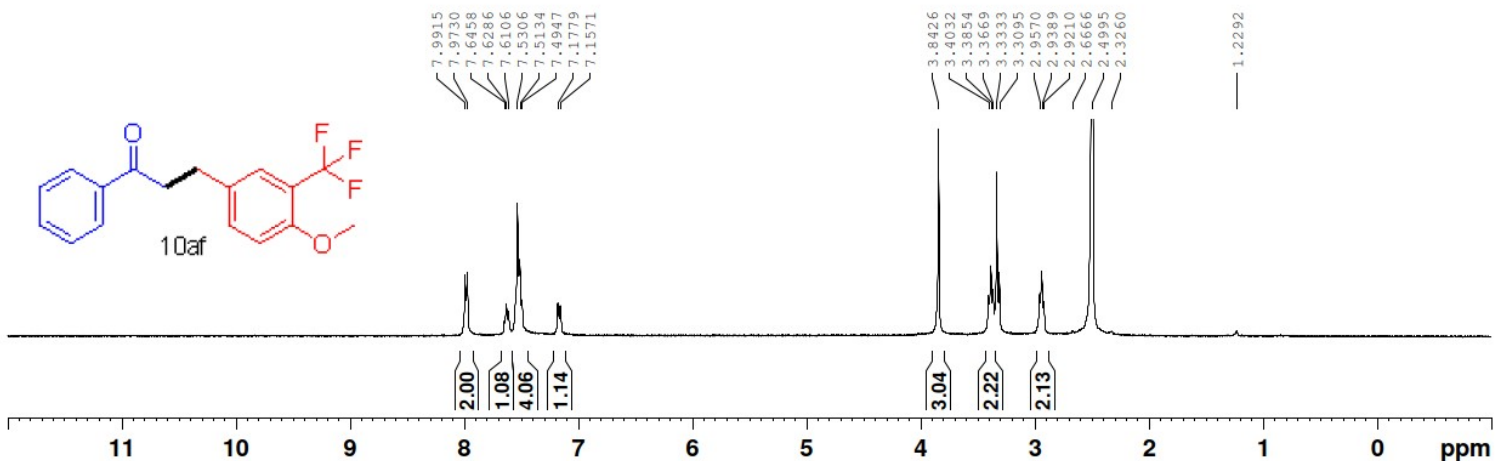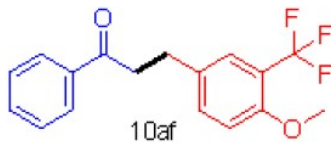



10af IN CDCl3-13C

```

Current Data Parameters
NAME 10af
EXPNO 60
PROCNO 1

F2 - Acquisition Parameters
Date_ 20230225
Time 2:32 h
INSTRUM spect
PROCNO 1104430_0173_1
PULPROG zgpg30
TD 65536
SOLVENT CDCl3
NS 2000
DS 4
SWH 25292.828 Hz
FIDRES 1.841292 Hz
AQ 0.4889364 sec
RG 64
DE 19.800 usec
TE 300.2 K
DQ 0.10 usec
SI 1.0000000 sec
SFL 0.02800000 sec
TOD 1
SFO1 100.6271973 MHz
NUC1 13C
P1 0.33 usec
PL1 0.00 usec
SFO2 400.2514000 MHz
NUC2 1H
SFO3 101.6261260 MHz
PCPD2 80.00 usec
PLWD 18.1800000 W
PLW2 0.4889364 W
PLW3 0.2840000 W
F2 - Processing parameters
SI 32768
SF 100.6271973 MHz
WDW EM
SSB 0
LB 2.00 Hz
GB 0
PC 1.00
  
```

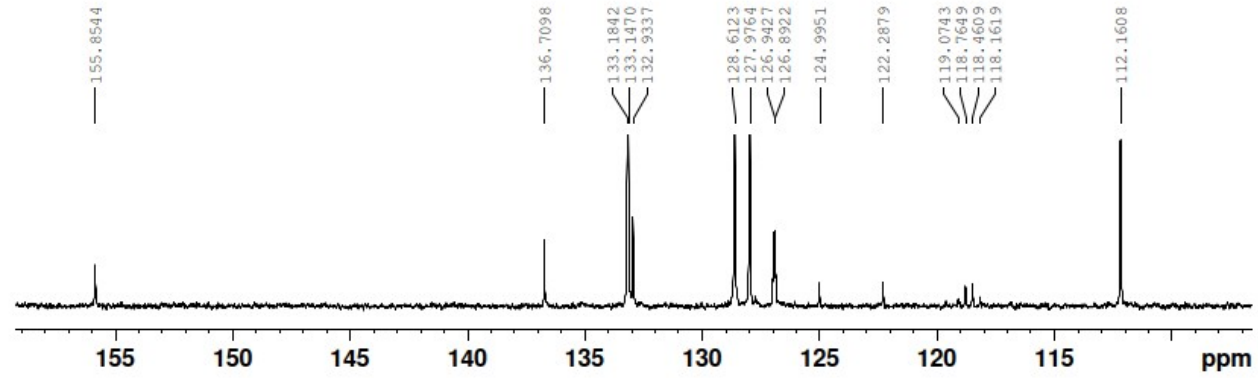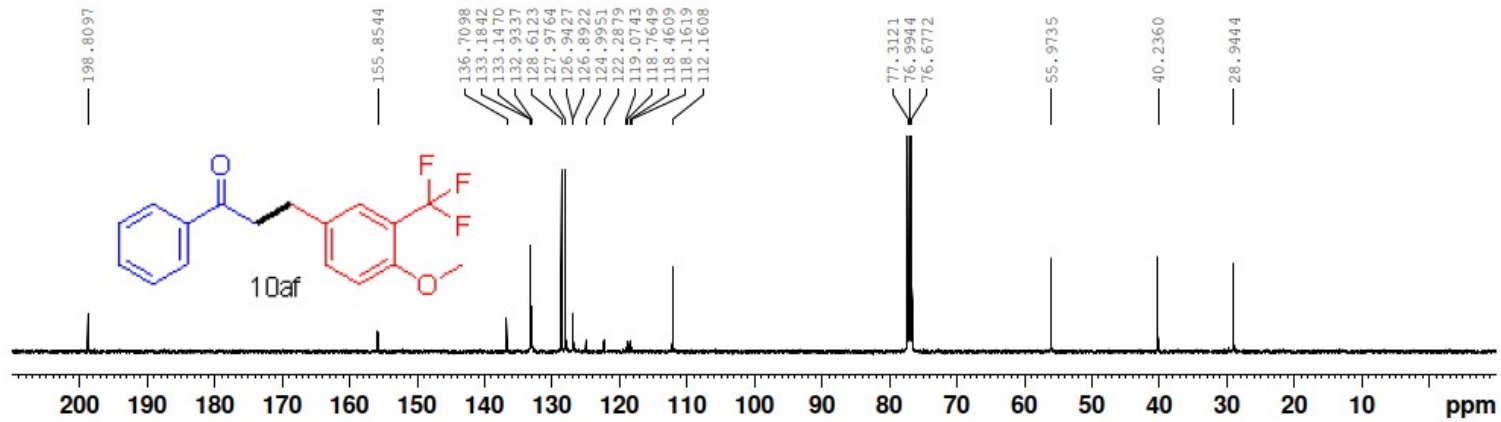

10af IN CDCl3-APT

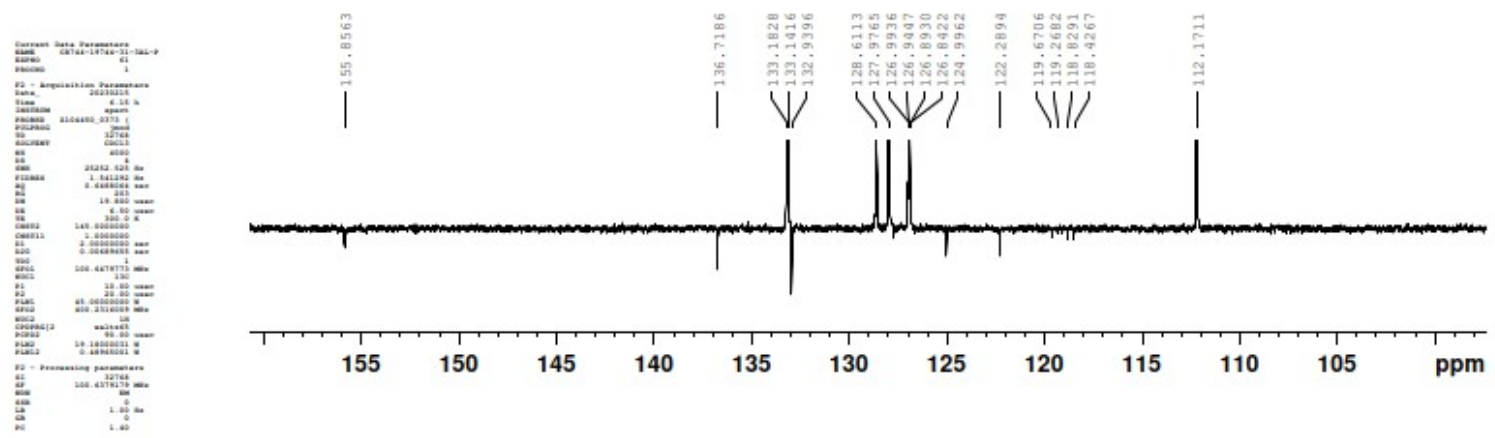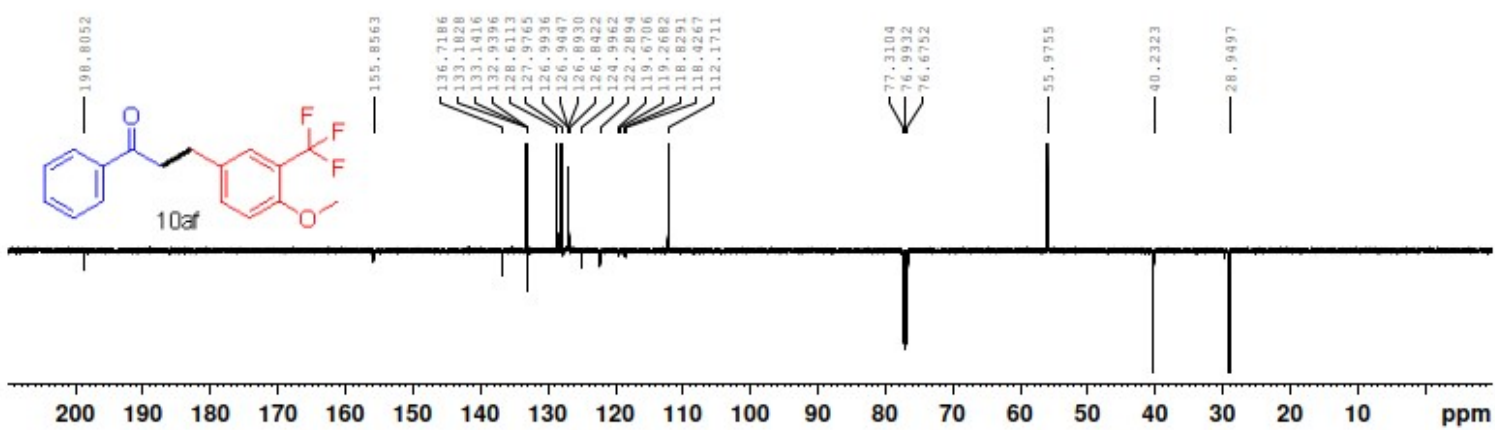

10ag IN MeOD

```

Current Data Parameters
NAME      10ag
EXPNO    10
PROCNO   1

F2 - Acquisition Parameters
Date_    20230202
Time     22.42 h
INSTRUM  spect
PROBHD   z104450_0373 (
PULPROG  zg30
TD       24636
SOLVENT  MeOD
NS       8
DS       0
SWH      8012.820 Hz
FIDRES   0.666735 Hz
AQ       1.4998465 sec
RG       28.5
DM       62.400 usec
DE       6.50 usec
TE       300.0 K
D1       1.00000000 sec
TDO      1
SFO1     400.2324014 MHz
NUC1     1H
PQ       4.79 usec
PI       14.58 usec
PLM1     19.18000031 W

F2 - Processing parameters
SI       6384
SF       400.2300115 MHz
MHZ      MHz
SXB      0
LB       0.30 Hz
GB       0
PC       1.00
    
```

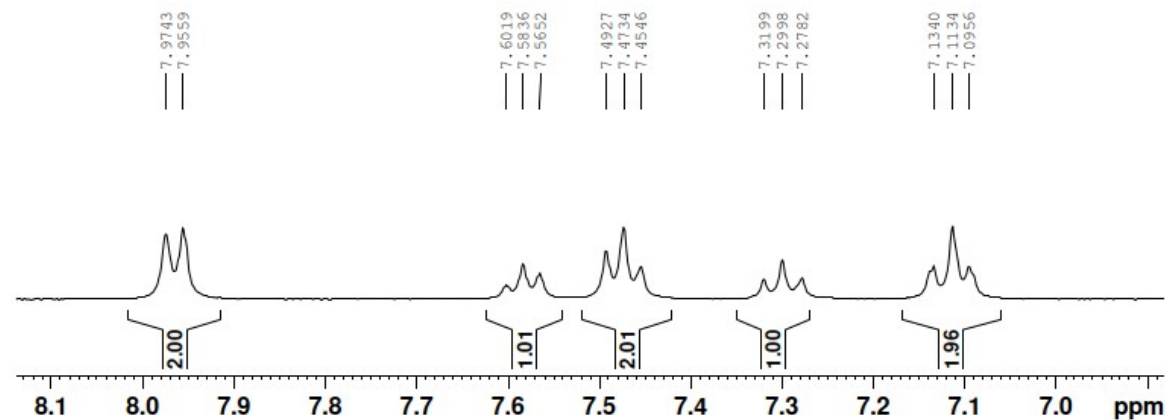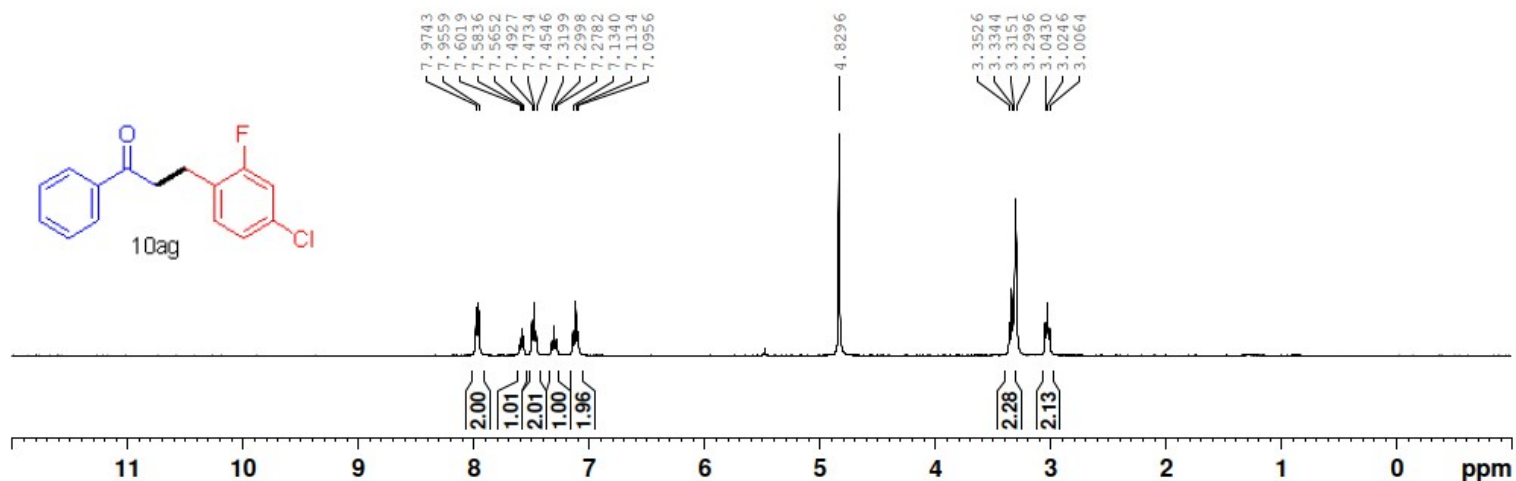

10ag IN CDCl3-13C

```

Current Data Parameters
NAME      10ag
EXPNO    1
PROCNO   1

F2 - Acquisition Parameters
Date_    20200208
Time     11:47 h
INSTRUM  Avance
PROBHD   1H/133
PULPROG  zgpg30
TD        65536
SOLVENT  CDCl3
NS        130
DS        4
SWH       23809.324 Hz
FIDRES    0.726609 Hz
AQ        1.3762300 sec
RG         501
DE         21.000 umm
TE         300.2 K
SI         2.00000000 sec
SIL        0.00000000 sec
TOS        1
SFO1      100.7450212 MHz
NUC1       13C
P1         2.07 umm
PL1        0.00 umm
PL2        00.00000000 W
SFO2      400.0014024 MHz
NUC2       1H
CPDPRG02  waltz16
PCPD2     80.00 umm
PULSE1    24.00000000 W
PULSE2    0.18270070 W
PULSE3    0.00000000 W

F2 - Processing parameters
SI         32768
SF         100.7309800 MHz
WDW        EM
SSB        0
GB         1.00 Hz
LB         1.00
GB         0
PC         1.00
    
```

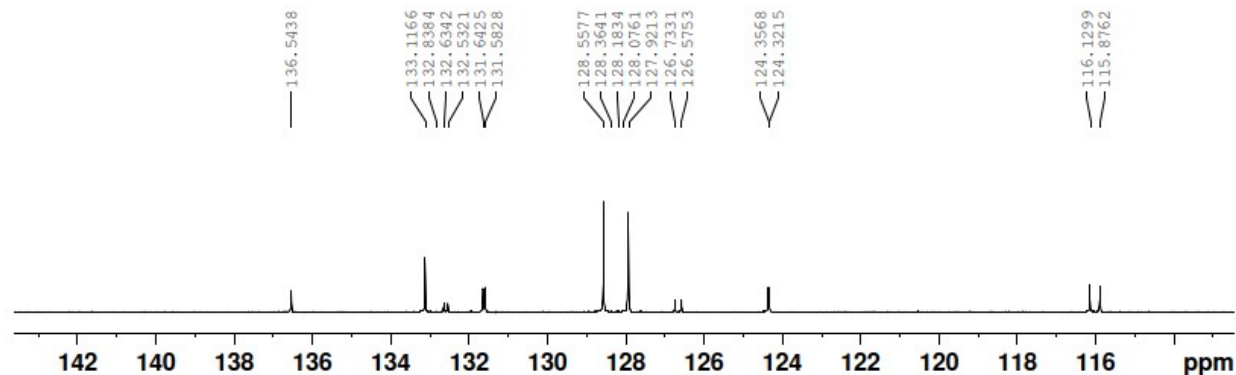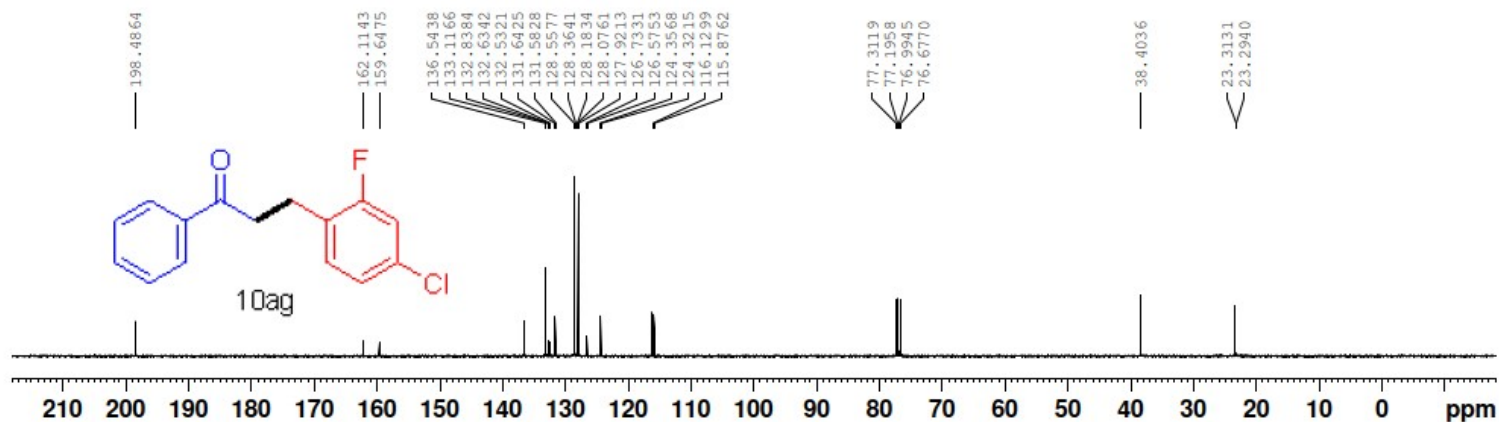

```

Current Data Parameters
NAME 10ag
EXPNO 1
PROCNO 1
F2 - Acquisition Parameters
Date_ 20230328
Time 11:30 h
INSTRUM spect
PROCNO 1163739_0113
PULPROG zgpg30
TD 65536
SOLVENT CDCl3
NS 130
DS 4
SWH 23809.624 Hz
FREQ0 0.126059 MHz
RG 1.0762560 MHz
AQ 101
DE 21.100 uMHz
TE 4.10 uMHz
TD 256.0 K
CMT02 149.000000
CMT01 1.000000
D1 2.0000000 MHz
D2 0.0000000 MHz
YD0 100.7410032 MHz
WDW1 1.00
SI 1.00 uMHz
F2 18.00 uMHz
SFB1 88.0000000 MHz
SFC1 400.4014034 MHz
SFC2
CPDPRG12 hsq148
PCPD2 90.00 uMHz
PLG1 24.0000000 MHz
PLG2 0.1827070 MHz
F2 - Processing parameters
SI 100.7500000 MHz
SF 100.7500000 MHz
SW 23768
DS 4
GB 0
SR 1.00 MHz
OR 1.00
PC

```

10ag IN CDCl3-APT

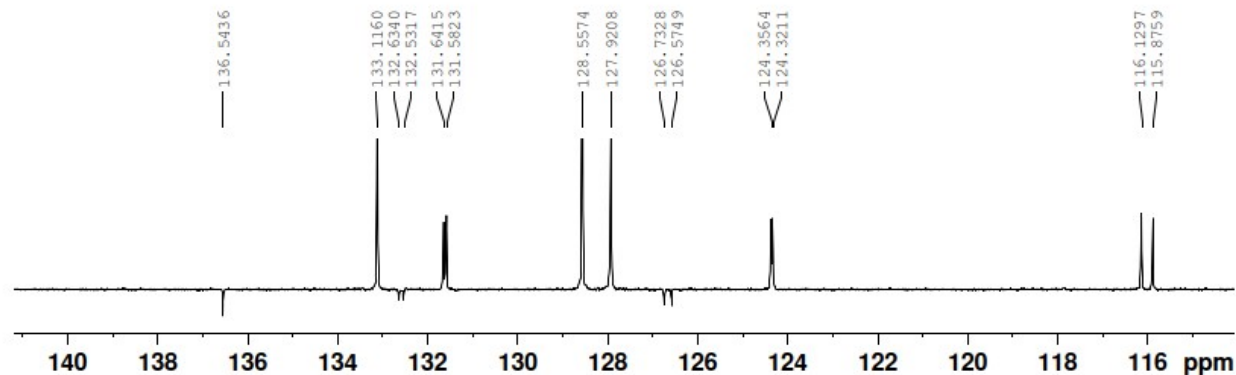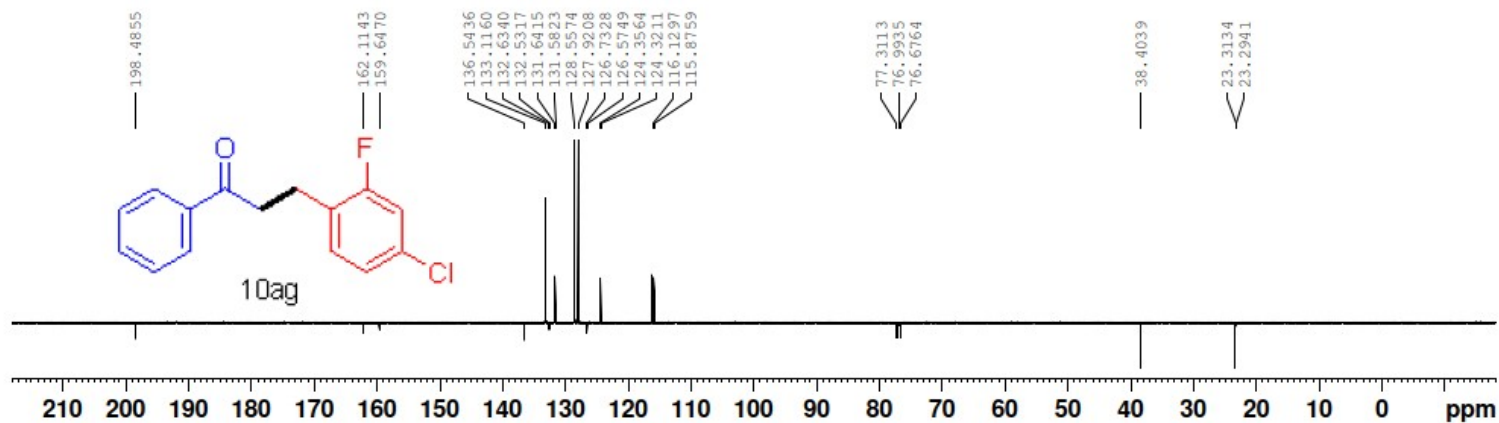

10ah IN MeOD

Current Data Parameters  
 NAME 10ah  
 EXPRO 10  
 PROCNO 1

F2 - Acquisition Parameters  
 Date\_ 20230203  
 Time 23.09 h  
 INSTRUM spect  
 PROBHD E104450\_0373 (   
 PULPROG zg30  
 TD 24036  
 SOLVENT MeOD  
 NS 8  
 DS 0  
 SWS 8012.820 Hz  
 FIDRES 0.666735 Hz  
 AQ 1.4998465 sec  
 RG 50.8  
 DW 62.400 usec  
 DE 6.50 usec  
 TE 300.0 K  
 EI 1.00000000 sec  
 TDO  
 SFO1 400.2324014 MHz  
 NUC1 1H  
 PC 4.79 usec  
 P1 14.38 usec  
 P1M1 19.18000031 u

F2 - Processing parameters  
 SI 16384  
 SF 400.2300115 MHz  
 MHZ SW  
 SSB 0  
 LB 0.30 Hz  
 GB 0  
 PC 1.00

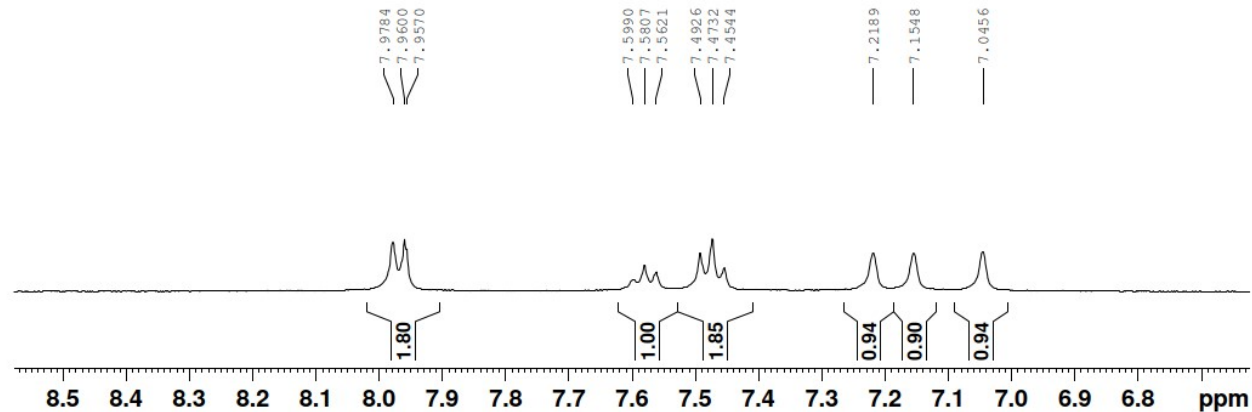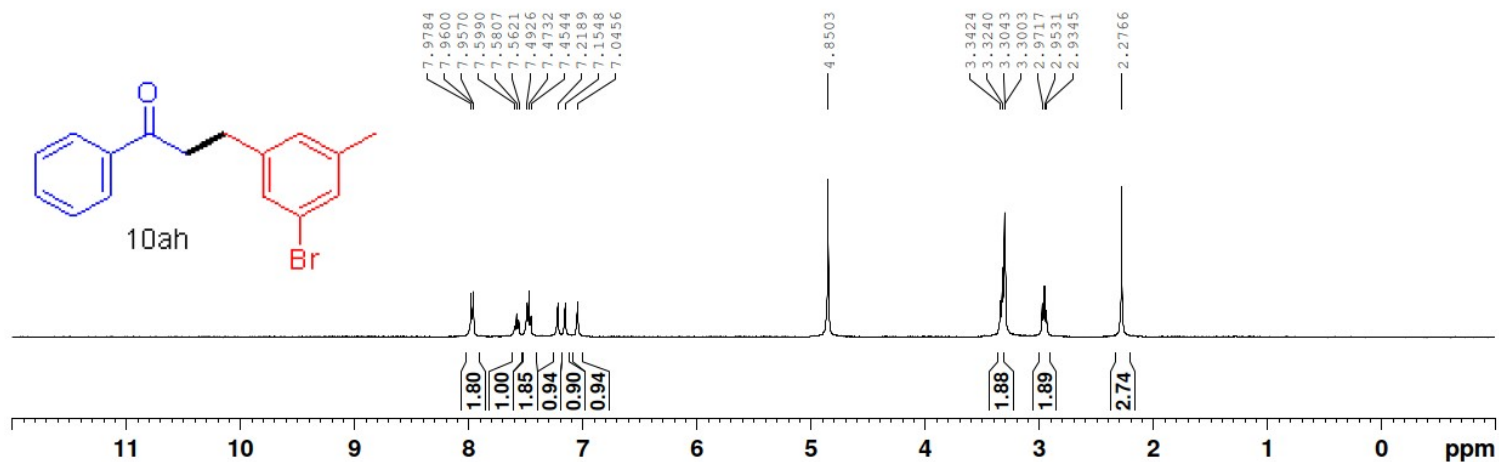

10ah IN CDC13-13C

```

Current Data Parameters
NAME 10ah
EXPNO 60
PROCNO 1

F2 - Acquisition Parameters
Date_ 20230204
Time 14.14 h
INSTRUM Avance Neo
PROBHD 5163739_0466 (
PULPROG zgpg30
TD 24576
SOLVENT CDC13
NS 500
DS 4
SWH 23809.523 Hz
FIDRES 1.937624 Hz
AQ 0.5160960 sec
RG 101
DW 21.000 usec
DE 6.50 usec
TE 298.2 K
D1 2.0000000 sec
D11 0.0300000 sec
TD0 1
SFO1 100.676101 MHz
NUC1 13C
PC 2.67 usec
PI 8.00 usec
P1 95.76200104 W
SFO2 400.3216013 MHz
NUC2 1H
CPDPRG2 waltz65
PCPD2 90.00 usec
PLAC 21.61000061 W
PLM12 0.17075001 W
SML3 0.0888460 W

F2 - Processing parameters
SI 32768
SF 100.6605519 MHz
WDW EM
SSB 0
LB 2.00 Hz
GB 0
PC 1.40
    
```

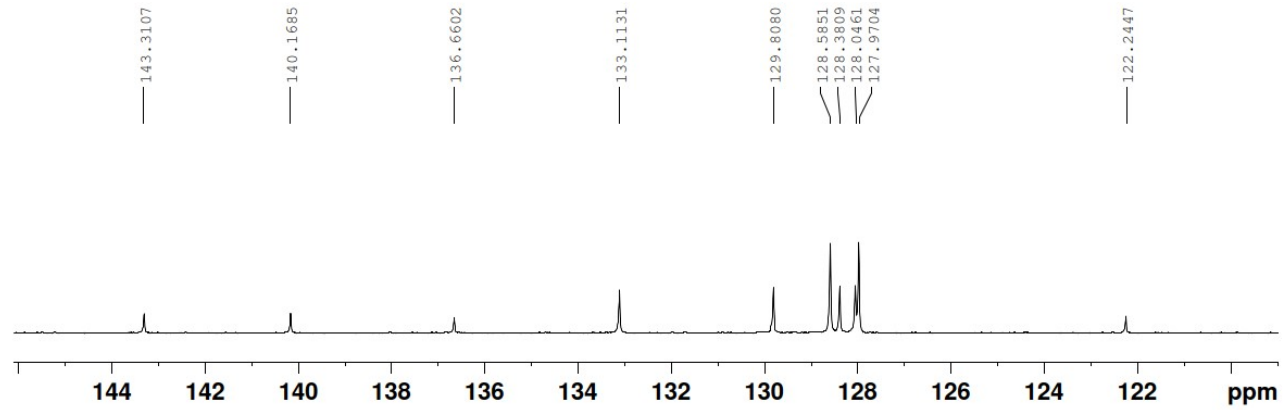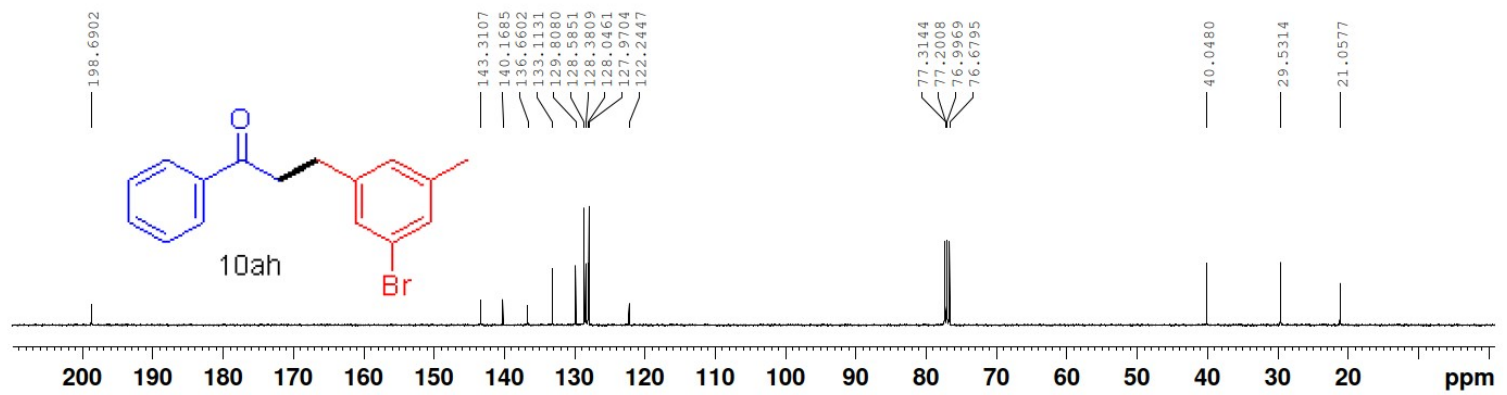

10ah IN CDC13-APT

```

Current Data Parameters
NAME      10ah
EXPNO    61
PROCNO   1

F2 - Acquisition Parameters
Data_    20230204
Time     14:27 h
INSTRUM  Avance Neo
PROBHD   1163739_0446
PULPROG  jmod
TD        24576
SOLVENT  CDCl3
NS        500
DS        4
SWH       23809.523 Hz
FIDRES    1.937624 Hz
AQ         0.5160960 sec
RG         101
DM         21.000 usec
DE         6.50 usec
TE        297.4 K
CNSF2     145.0000000
CNSF11    1.0000000
D1         1.0000000 sec
D20        0.00689655 sec
TDO        1
SFO1      100.6706101 MHz
NUC1       13C
P1         8.00 usec
P2         18.00 usec
PLM1      95.76200104 M
SFO2      400.3216013 MHz
NUC2       1H
CPDPRG2   waltz165
PCPD2     90.00 usec
PLM2      21.61000061 M
PLM12     0.17075001 M

F2 - Processing parameters
SI         32758
SF         100.6605520 MHz
SOLV       CDCl3
SOLV2     1H
SOLV3     13C
LB         2.00 Hz
GB         0
PC         1.40
    
```

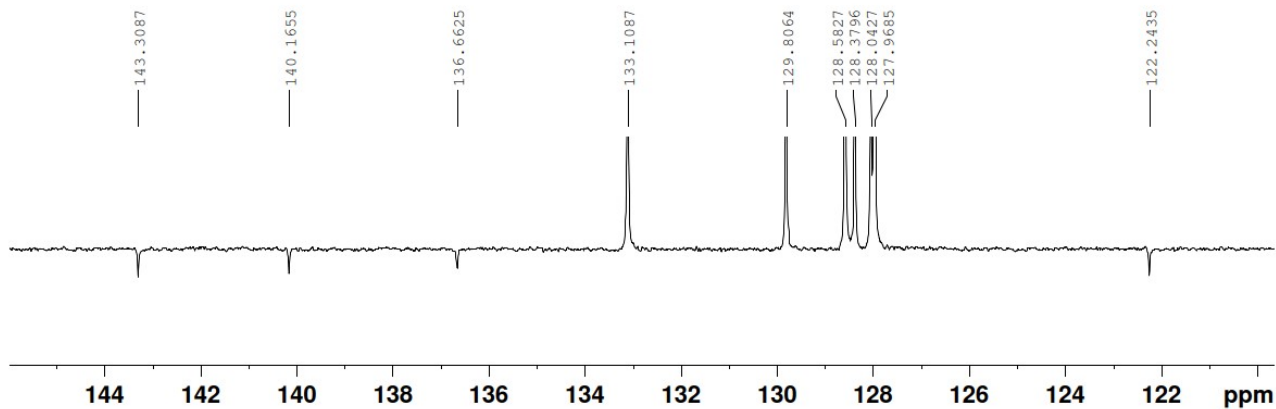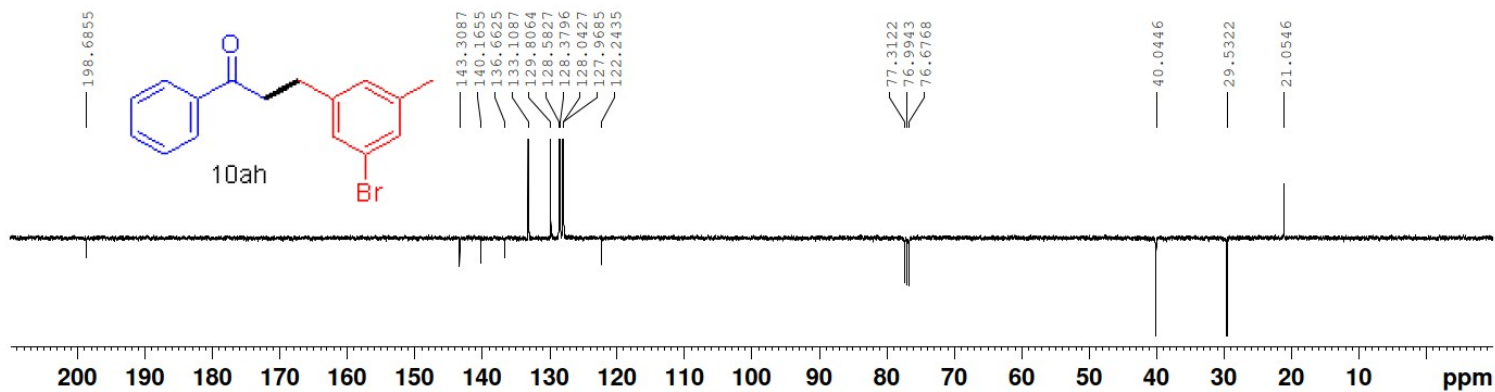



10ai IN DMSO

Current Data Parameters  
 NAME 10ai  
 EXPRO 10  
 PROCNO 1

F2 - Acquisition Parameters  
 Date\_ 20230204  
 Time 0.21 h  
 INSTRUM spect  
 PROBHD E104450\_0373 (   
 PULPROG zg30  
 TD 24036  
 SOLVENT DMSO  
 NS 8  
 DS 0  
 SWS 8012.820 Hz  
 FIDRES 0.666735 Hz  
 AQ 1.4998465 sec  
 RG 50.8  
 DW 62.400 usec  
 DE 6.50 usec  
 TE 300.0 K  
 SI 1.00000000 sec  
 TDO  
 SFO1 400.2324014 MHz  
 NUC1 1H  
 PC 4.79 usec  
 P1 14.38 usec  
 PL1 19.1800031 W

F2 - Processing parameters  
 SI 16384  
 SF 400.2300031 MHz  
 MW SW  
 SSB 0  
 LB 0.30 Hz  
 GB 0  
 PC 1.00

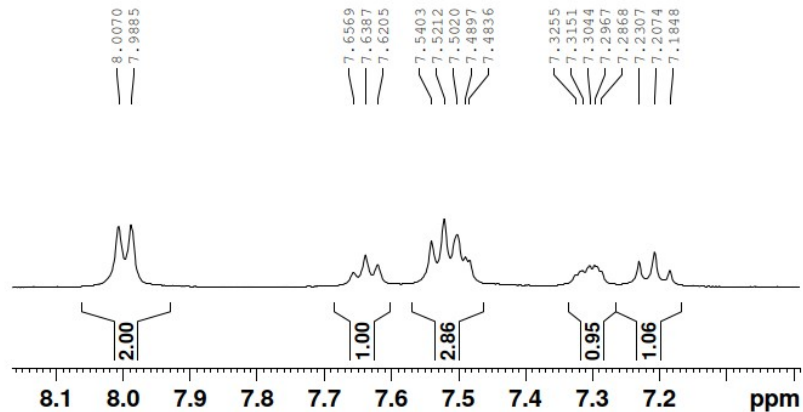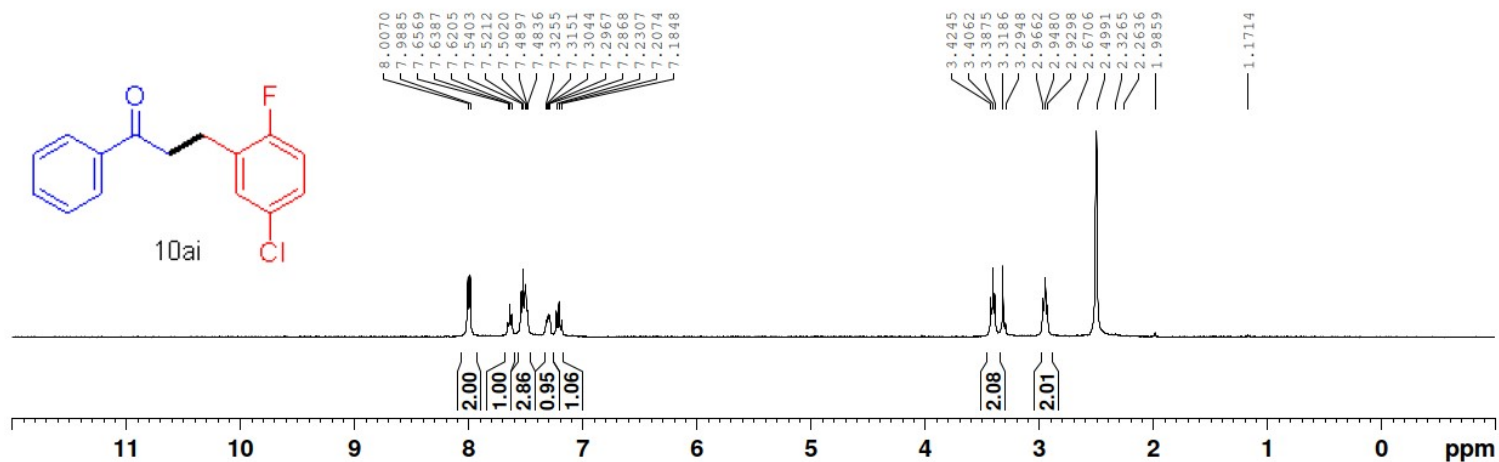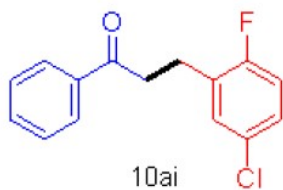

10ai IN CDCl3-13C

```

Current Data Parameters
NAME 10ai
EXPNO 60
PROCNO 1

F2 - Acquisition Parameters
Date_ 20220208
Time 0:27:4
INSTRUM spect
PROBHD 1104450.1713 1
PULPROG zgpg30
TD 32768
SOLVENT CDCl3
NS 2000
DS 4
SWH 23232.328 Hz
FIDRES 1.041292 Hz
AQ 0.1628204 sec
RG 64
DE 10.000 usec
TE 300.2 K
SI 1.03800000 sec
SLL 0.03800000 sec
TSE 1
SFO1 100.6271713 MHz
MPC1 13C
PC 3.33 usec
PI 0.00 usec
PWL1 41.03800000 W
SFO2 400.2514009 MHz
MPC2 1H
PCP2 10.00 usec
PLW2 10.18000000 W
PWL2 0.48000000 W
MPC3 0.24820000 W

F2 - Processing parameters
SI 100.6271713 MHz
SF 100.6271713 MHz
WDW EM
SSB 0
GB 0
PC 1.40
    
```

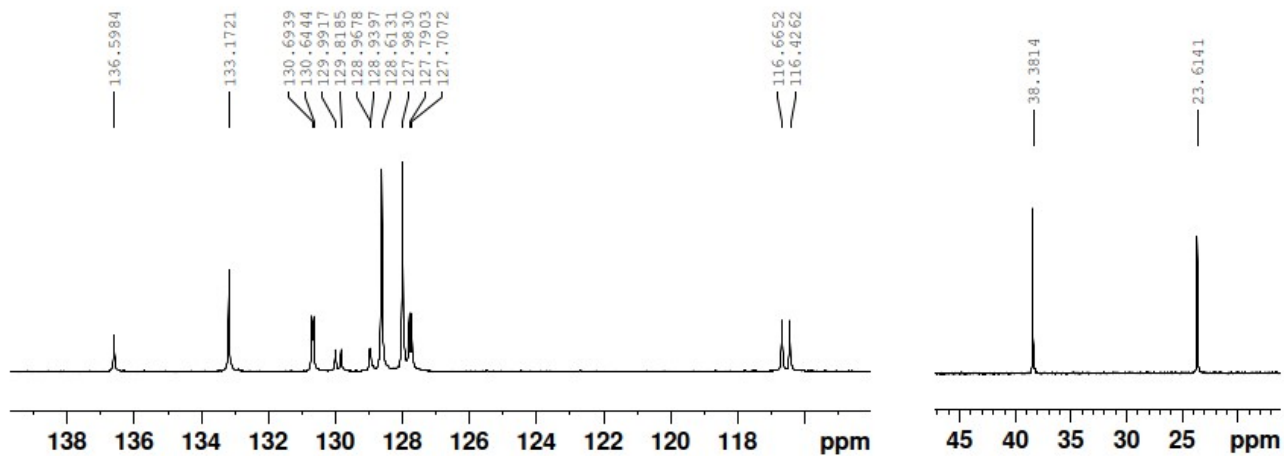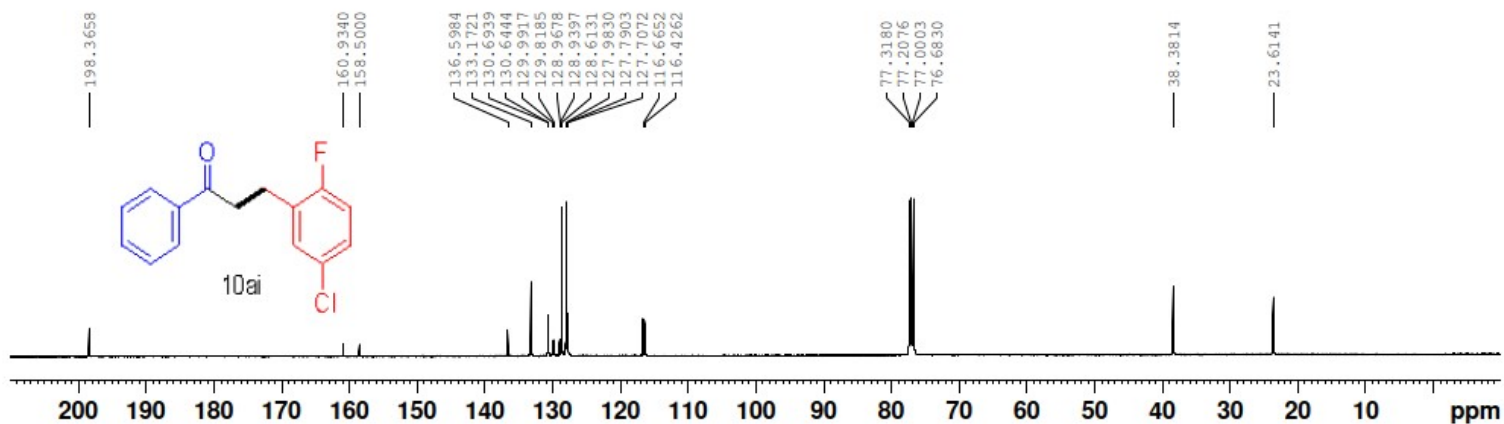

```

Current Data Parameters
NAME 10ai
EXPNO 12a1
SI
PROCNO 1
F2 - Acquisition Parameters
Date_ 20220220
Time 15:25 h
INSTRUM spect
PROBHD 13Q440.0575 (
PULPROG zgpg30
TD 32768
SOLVENT CDCl3
NS 2050
DS 4
SWH 25252.4 Hz
FIDRES 1.641292 Hz
AQ 0.489354 sec
RG 223
CW 19.400 uHz
DE 4.50 uHz
TE 300.2 K
CMT02 149.000000
CMT01 1.000000
DL 2.0000000 sec
DSB 0.0000000 sec
YD0 1
SFO2 100.6279713 MHz
NUC1 13C
NUC2 13C
P2 20.00 uHz
P1W2 48.0000000 W
SFO1 625.2144000 MHz
MDC2 1K
CQPC0012 1411448
PCPD0 80.00 uHz
P1W0 19.1480000 W
P1W12 0.4936000 W
F2 - Processing parameters
SI
SF 100.6279713 MHz
WDW EM
SSB 0
GB 0
PC 1.40
  
```

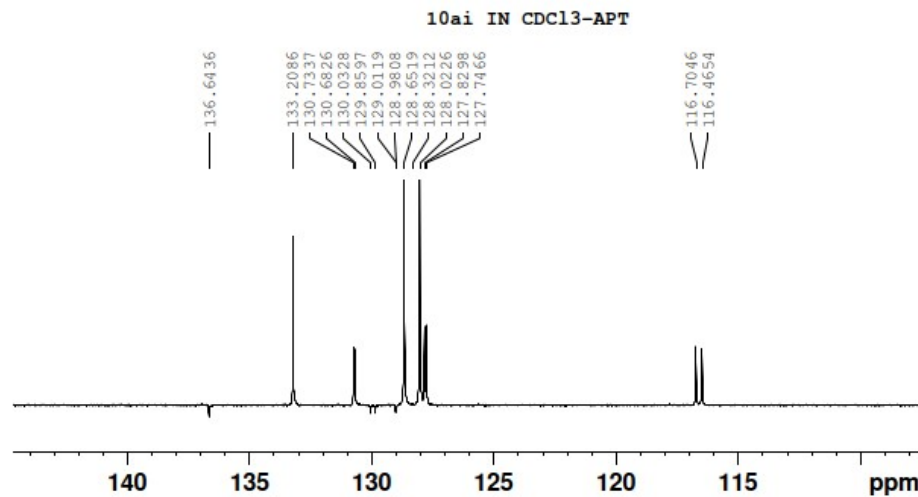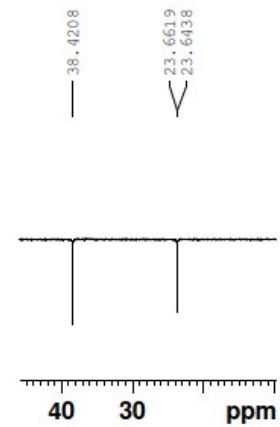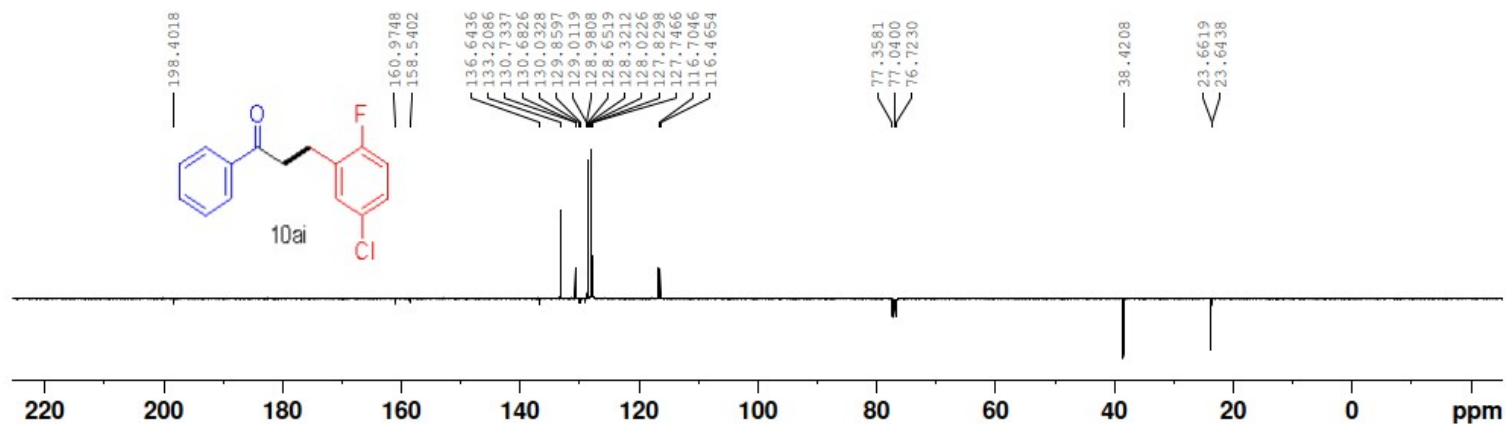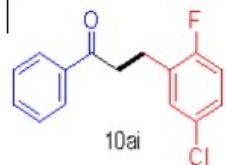

10aj IN MeOD

```

Current Data Parameters
NAME      10aj
EXPNO    10
PROCNO   1

F2 - Acquisition Parameters
Date_    20230210
Time     19.07 h
INSTRUM  spect
PROBHD   z163739_0162 (
PULPROG  zg30
TD       24036
SOLVENT  MeOD
NS       8
DS       0
SWH      8012.820 Hz
FIDRES   0.646735 Hz
AQ       1.4998445 sec
RG       208.6
DM       62.400 usec
DE       18.11 usec
TE       298.4 K
D1       0 sec
TDO      1
SFO1     400.1724710 MHz
NUC1     1H
P0       2.67 usec
P1       8.50 usec
PLM1     21.75399971 W

F2 - Processing parameters
SI       6384
SF       400.1700120 MHz
WDW      EM
SSB      0
LB       0.60 Hz
GB       0
PC       1.00
    
```

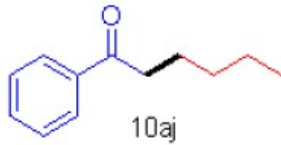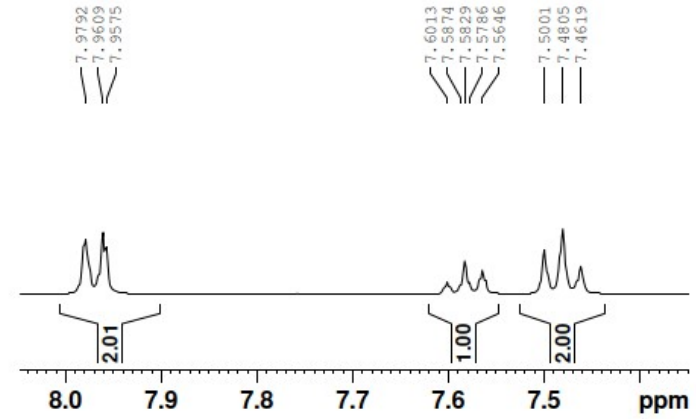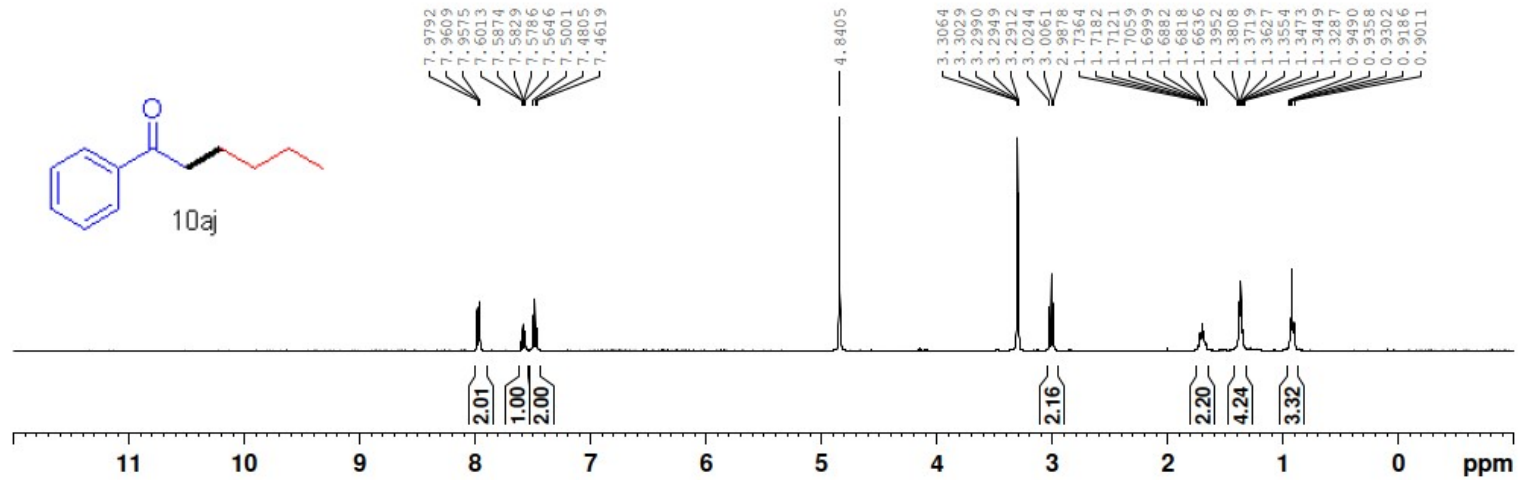

10ak IN DMSO

Current Data Parameters  
 NAME 10ak  
 EXPNO 10  
 PROCNO 1

F2 - Acquisition Parameters  
 Date\_ 20230204  
 Time 13.26 h  
 INSTRUM spect  
 PROCNO 2104450\_0373 ( )  
 PULPROG zg30  
 TD 24036  
 SOLVENT DMSO  
 NS 8  
 DS 0  
 SWH 8012.820 Hz  
 FIDRES 0.664735 Hz  
 AQ 1.4999465 sec  
 RG 30.8  
 CW 42.400 usec  
 DE 4.50 usec  
 TE 300.0 K  
 SI 0 sec  
 TDO 1  
 SFO1 400.2324014 MHz  
 NUC1 1H  
 PG 4.79 usec  
 PI 14.38 usec  
 P181 19.1600021 W

F2 - Processing parameters  
 SI 14384  
 SF 400.230026 MHz  
 NH 8M  
 SH 0  
 LB 0.30 Hz  
 GB 0  
 PC 1.00

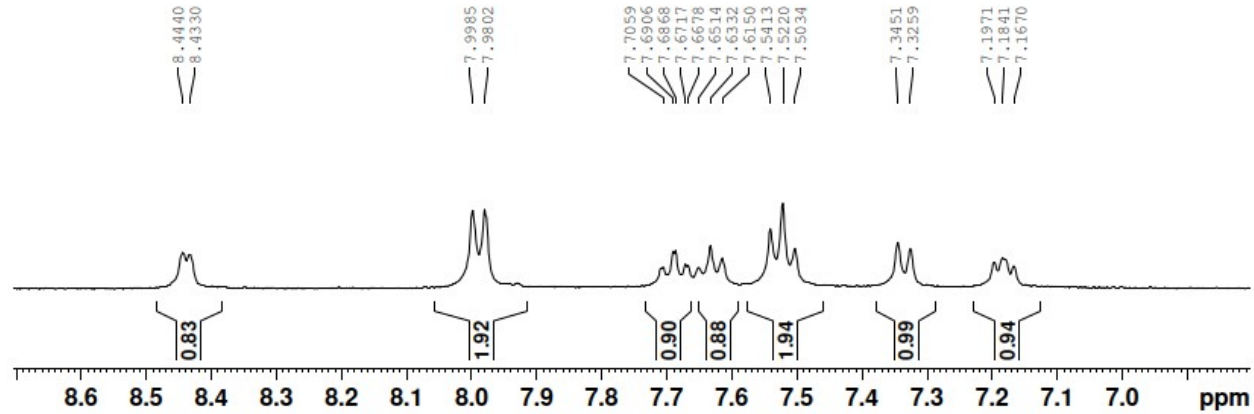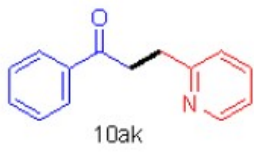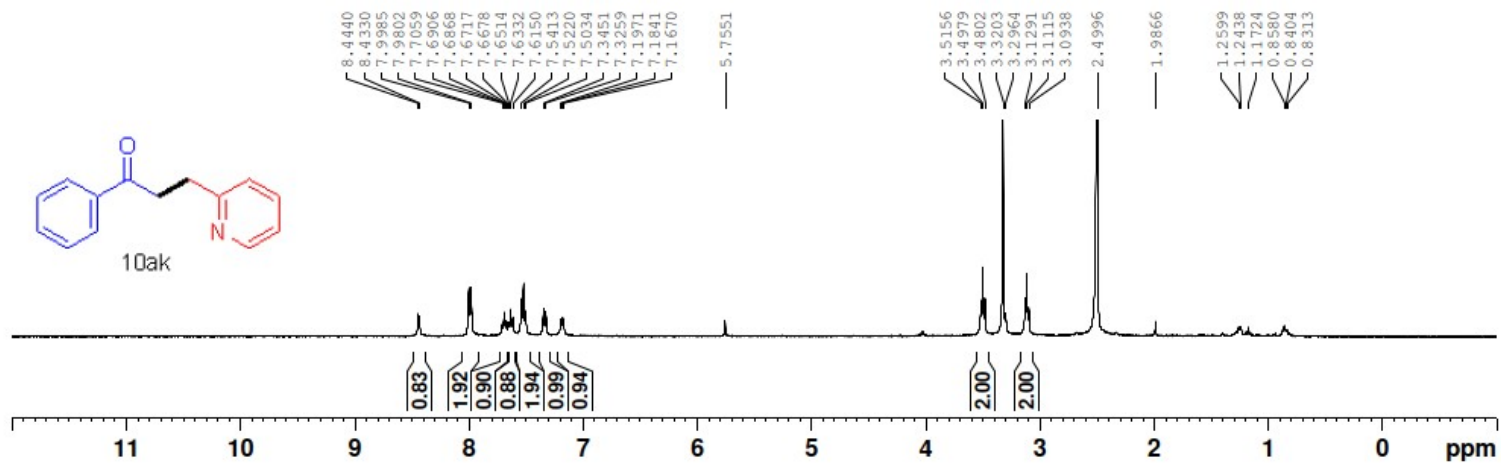

10a1 IN MEOD

```

Current Data Parameters
NAME      10a1
EXPNO     10
PROCNO    1

F2 - Acquisition Parameters
Date_     20230203
Time      14.36 h
INSTRUM   spect
PROBHD    E104450_0373 (
PULPROG   zg30
TD        24036
SOLVENT   MeOD
NS        8
DS        0
SWH       8012.820 Hz
FIDRES    0.644735 Hz
AQ        1.4998465 sec
RG        30.8
CW        42.400 usec
DE        4.50 usec
TE        300.0 K
SI        0 sec
TQ0       1
SFO1      400.2324014 MHz
NUC1      1H
PC        4.79 usec
PI        14.38 usec
P181      19.1600021 W

F2 - Processing parameters
SI        14384
SF        400.2350114 MHz
WDW       EM
SSB       0
LB        0.30 Hz
GB        0
PC        1.00
    
```

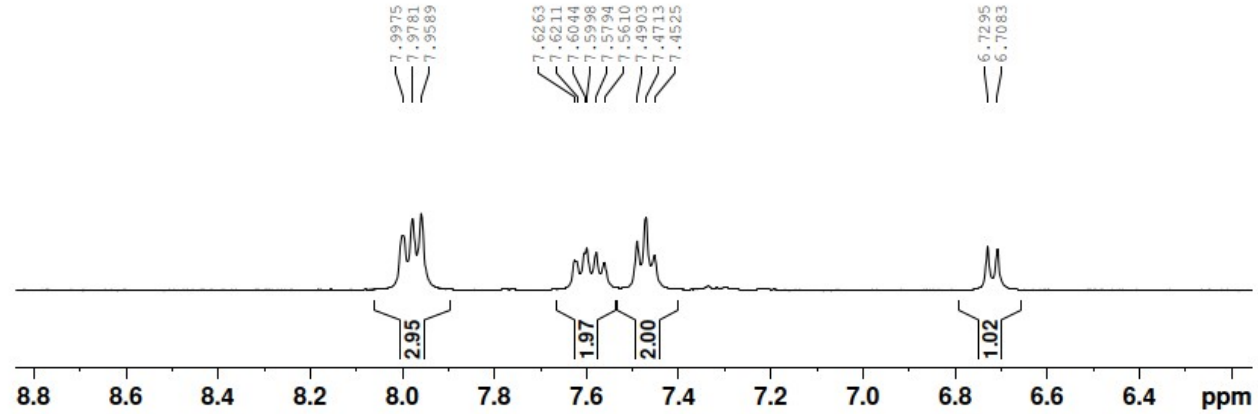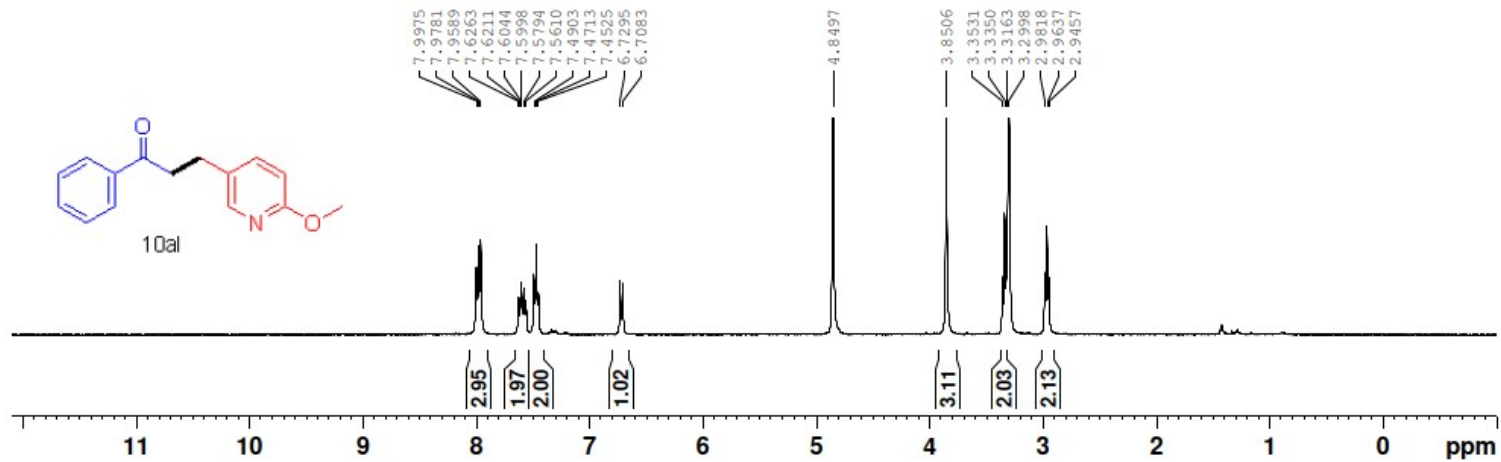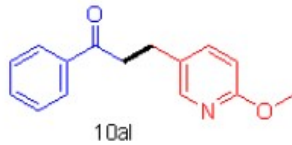

10a1 IN CDCl3-13C

```

Current Data Parameters
NAME      CR144-20008-12-3AP-P
EXPNO    60
PROCNO   1
F2 - Acquisition Parameters
Date_    20230204
Time     2.00 h
INSTRUM  Avance Neo
PROCNO   2143739_0444
PULPROG  zgpg30
TD        24576
SOLVENT  CDCl3
NS        844
DS        4
SWH       23809.523 Hz
FIDRES   1.927424 Hz
AQ        0.5160960 sec
RG        101
DW        21.000 usec
DE        6.50 usec
TE        297.6 K
D1        2.0000000 sec
D11       0.0300000 sec
TSD       1
SFO1      100.626101 MHz
NUC1      13C
PQ        2.47 usec
PI        0.00 usec
PL1       95.74200104 Hz
SFO2      400.3216013 MHz
NUC2      1H
CPSRG2    waltz165
P2RG2     80.00 usec
PLRG2     21.41000061 Hz
PLRG3     0.17070001 Hz
PLRG4     0.00000000 Hz
F2 - Processing parameters
SI        32768
SF        100.626101 MHz
WDW       EM
SSB       0
LB        2.00 Hz
GB        0
PC        1.40
    
```

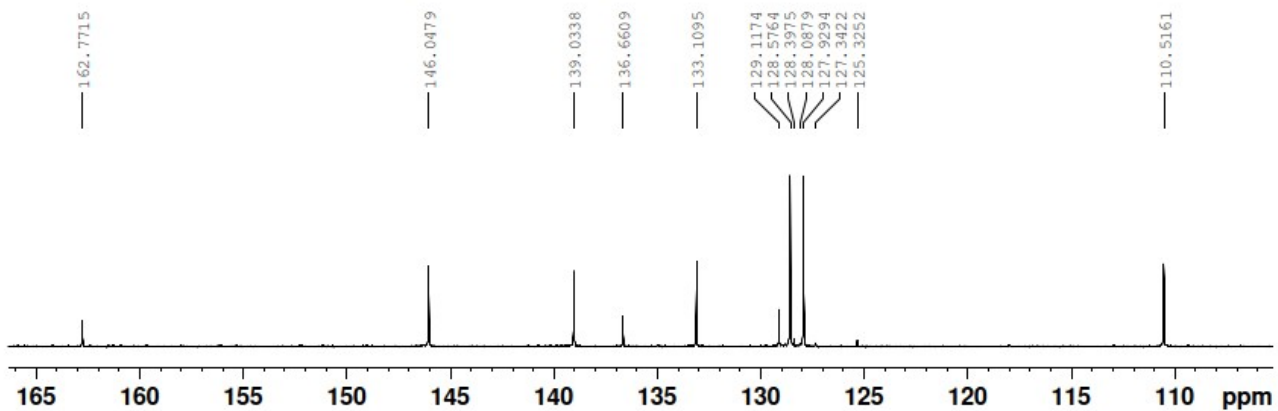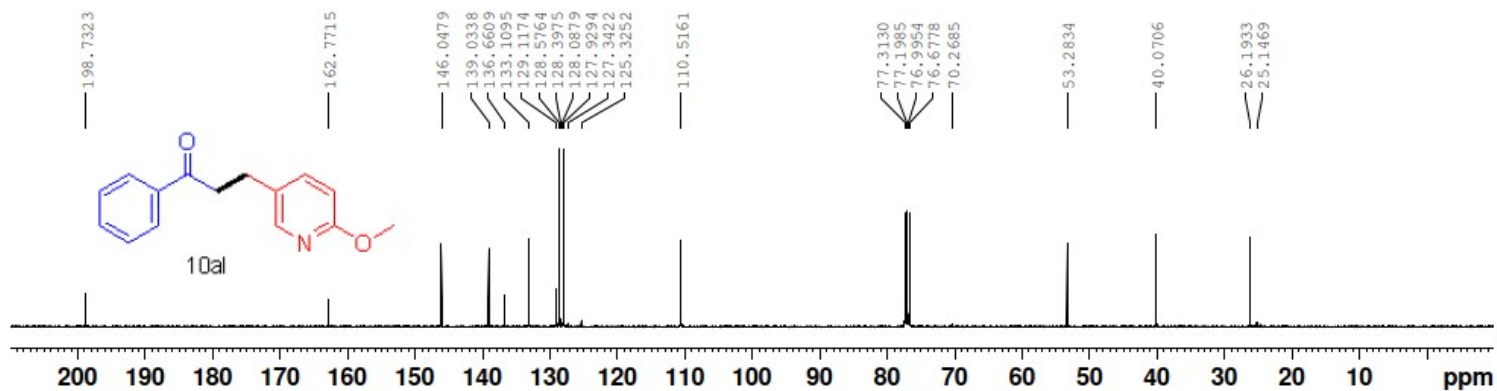

10al IN CDCl3-APT

```

Current Data Parameters
NAME 10al
EXPNO 1
PROCNO 1

F2 - Acquisition Parameters
Date_ 20230204
Time 4:10 h
INSTRUM Avance Neo
PROBHD 1H30000446 (
PULPROG smod
TD 26576
SOLVENT CDCl3
NS 5000
DS 4
SWH 23809.523 Hz
FIDRES 1.927428 Hz
AQ 0.5140960 sec
RG 101
DM 21.000 usec
DE 6.50 usec
TE 297.8 K
CMT2 145.000000
CMT1 1.000000
D1 1.0000000 sec
D2 0.0068945 sec
TSD 1
SFO1 100.676101 MHz
NUC1 13C
P1 8.00 usec
P2 14.00 usec
PLA1 95.7420104 W
PLA2 400.3216011 MHz
NUC2 13C
CQPCPG2 waltz165
SFO2 125.761445 MHz
PLM2 21.4100061 W
PLM1 0.17075001 W

F2 - Processing parameters
SI 32768
SF 100.625116 MHz
RG 656
SFB 0
LB 2.00 Hz
GB 0
PC 1.40
    
```

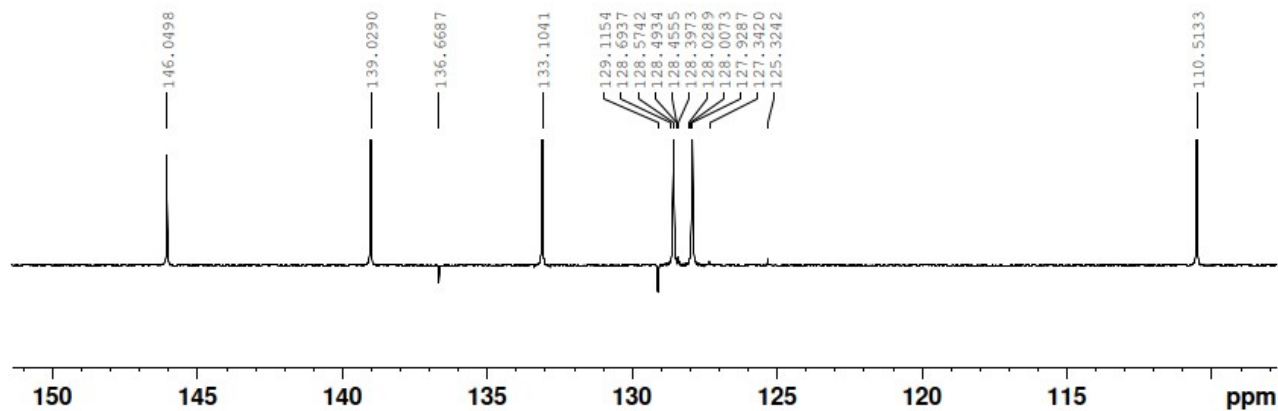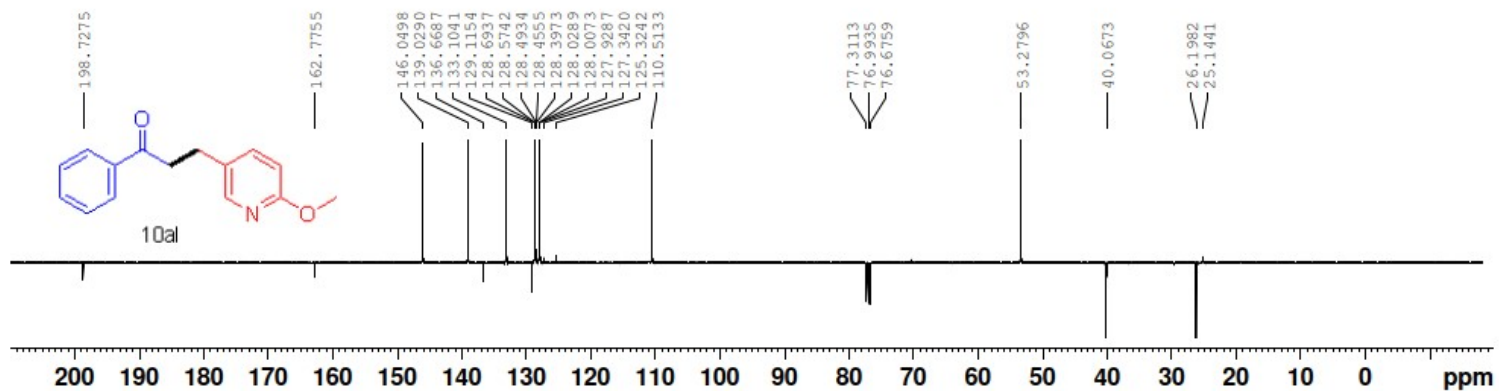



10ba IN MeOD

```

Current Data Parameters
NAME      10ba
EXPNO    10
PROCNO   1

F2 - Acquisition Parameters
Date_    20230211
Time     12.57 h
INSTRUM  spect
PROBHD   E104450_0373 (
PULPROG  zg30
TD        24036
SOLVENT  MeOD
NS        8
DS        0
SWH       8012.820 Hz
FIDRES    0.664735 Hz
AQ        1.4959465 sec
RG        203
SWH       42.400 usec
DE        4.50 usec
TE        300.0 K
SI        1.00000000 sec
TQ0       1
SFO1      400.2324014 MHz
NUC1      1H
PC        4.70 usec
PI        14.38 usec
P181     19.16000031 W

F2 - Processing parameters
SI        14384
SF        400.2300116 MHz
WDW       EM
SSB       0
GB        0
LB        0.30 Hz
GB        0
PC        1.00
    
```

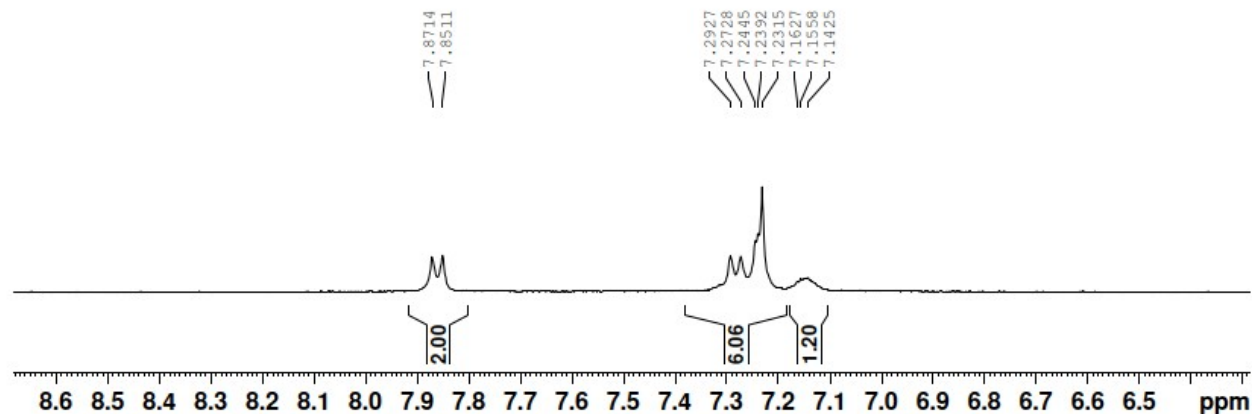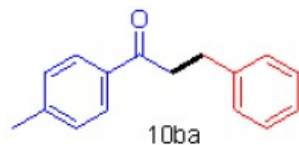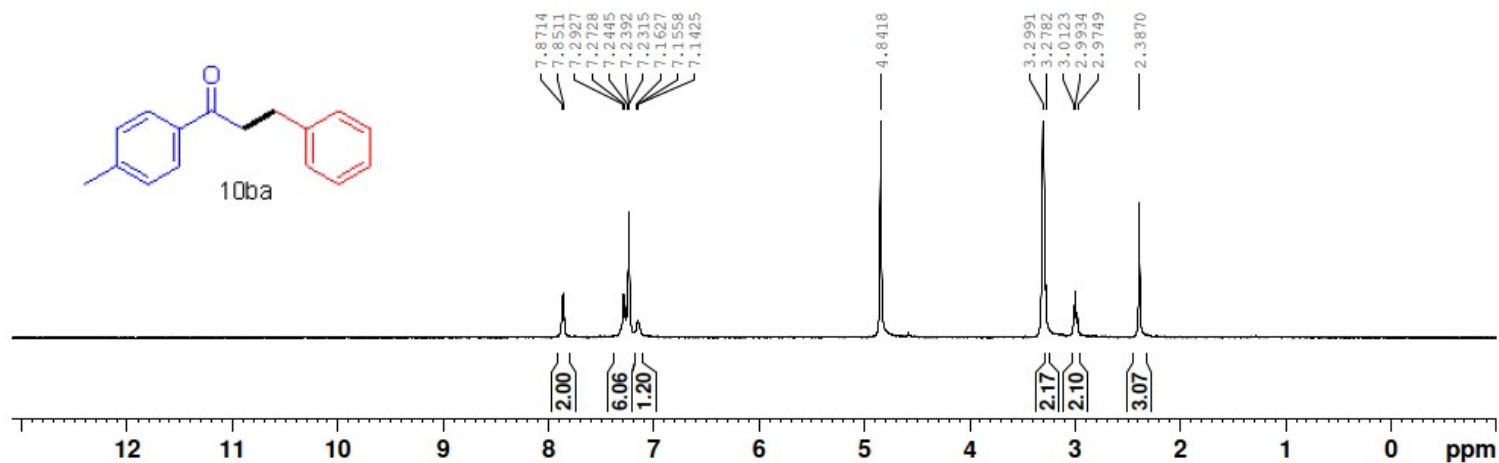

10bj IN MeOD

Current Data Parameters  
 NAME 10bj  
 EXPNO 10  
 PROCNO 1  
 F2 - Acquisition Parameters  
 Date\_ 20230216  
 Time 1.10 h  
 INSTRUM spect  
 PROBHD Z104450\_0373 ( )  
 PULPROG zg30  
 TD 24036  
 SOLVENT MeOD  
 NS 8  
 DS 0  
 SWH 10000.000 Hz  
 FIDRES 0.832085 Hz  
 AQ 1.2018900 sec  
 RG 203  
 DW 50.900 usec  
 DE 6.50 usec  
 TE 300.0 K  
 D1 0 sec  
 TDO 0  
 SFO1 400.2324014 MHz  
 NUC1 1H  
 PD 4.79 usec  
 P1 14.38 usec  
 PL1 19.18000031 W  
 F2 - Processing parameters  
 SI 16384  
 SF 400.2300107 MHz  
 NEW EQ  
 SSB 0  
 LB 0.30 Hz  
 GB 0  
 PC 1.00

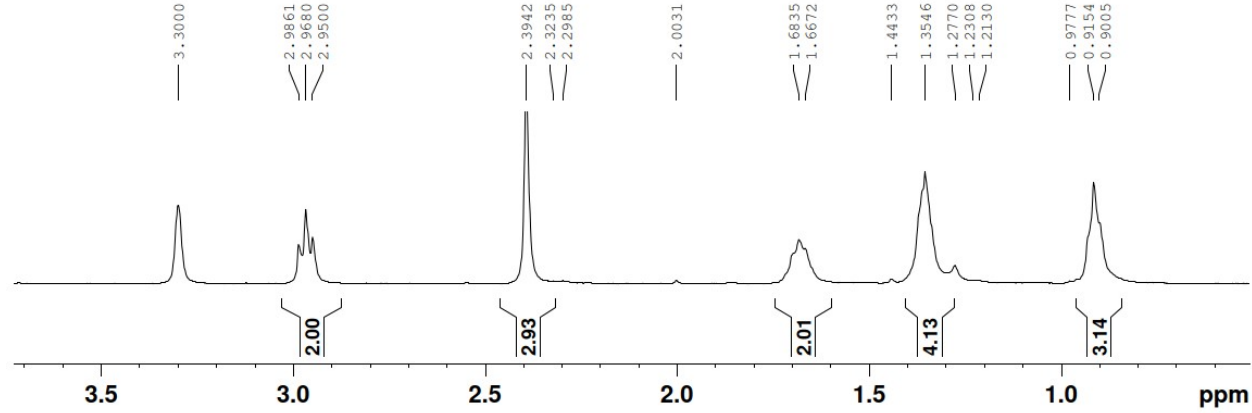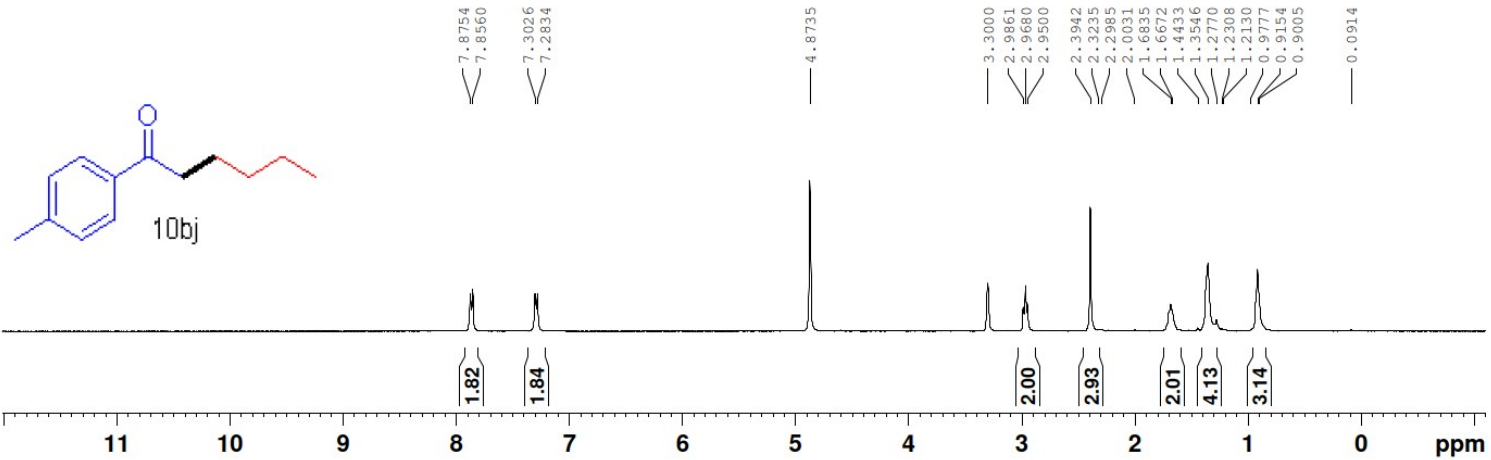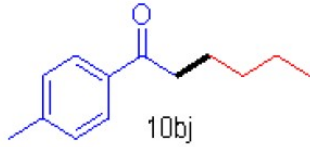

10ca IN MeOD

```

Current Data Parameters
NAME      10ca
EXPNO     10
PROCNO    1

F2 - Acquisition Parameters
Date_     20230210
Time      17.55 h
INSTRUM   spect
PROBHD    E104450_0373 (
PULPROG   zg30
TD         24026
SOLVENT   MeOD
NS         8
DS         0
SWH        8012.820 Hz
FIDRES     0.644735 Hz
AQ         1.4999465 sec
RG         203
SQ         42.400 usec
DE         6.50 usec
TE         300.0 K
SI         0 sec
TQ0        1
SFO1       400.2324014 MHz
NUC1       1H
PQ         4.70 usec
PI         14.38 usec
P181       19.1600021 W

F2 - Processing parameters
SI         14384
SF         400.2320116 MHz
WDW        EM
SSB        0
LB         0.30 Hz
GB         0
PC         1.00
    
```

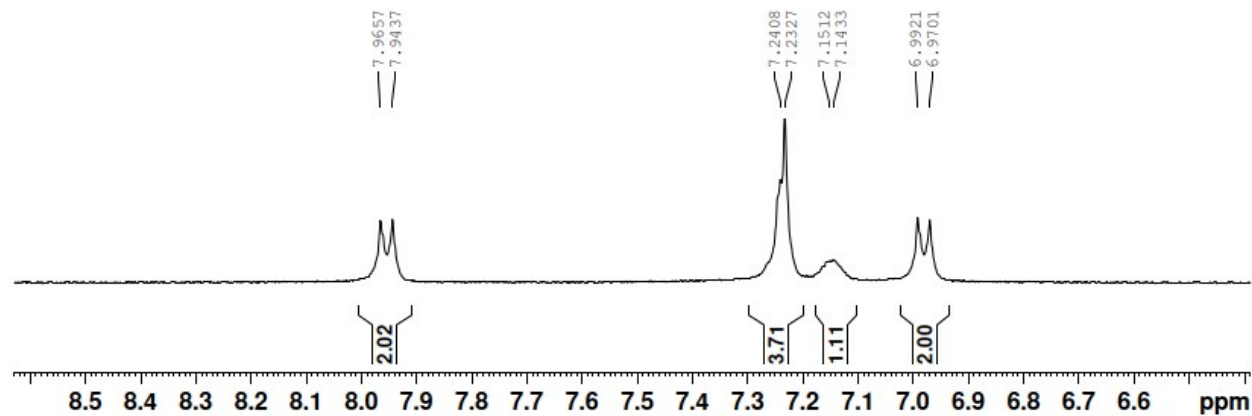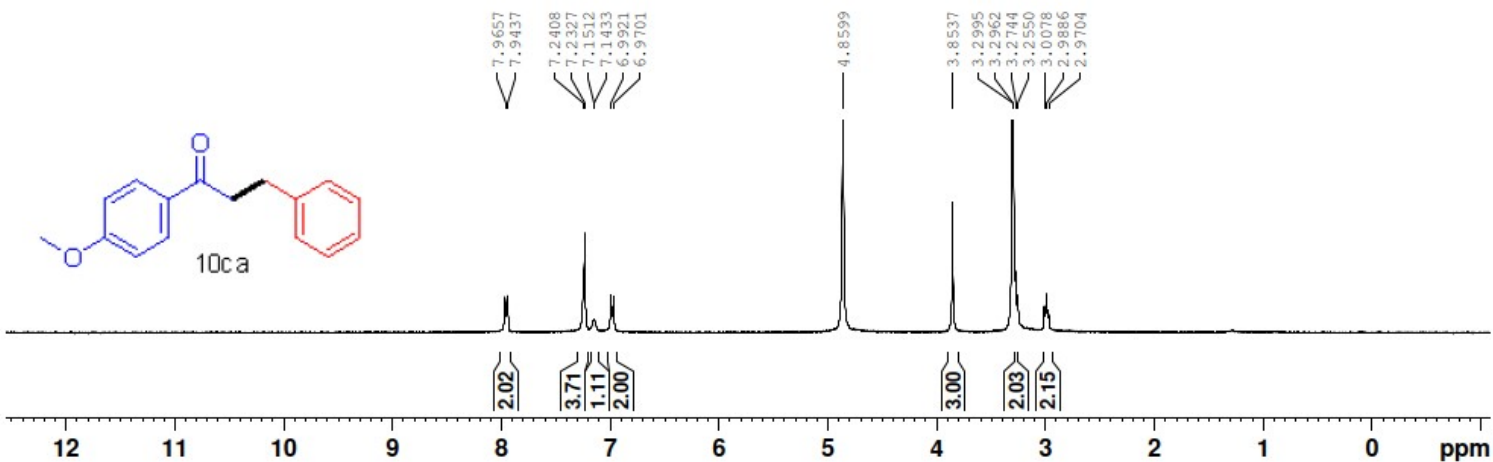

10cj IN MeOD

```

Current Data Parameters
NAME      10cj
EXPNO    10
PROCNO   1

F2 - Acquisition Parameters
Date_    20230216
Time     9.54 h
INSTRUM  spect
PROBHD   E104450_0373 (
PULPROG  zg30
TD       24036
SOLVENT  MeOD
NS       8
DS       0
SWH      8012.820 Hz
FIDRES   0.644735 Hz
AQ       1.4999465 sec
RG       28.5
CW       42.400 usec
DE       6.50 usec
TE       300.0 K
SI       1.00000000 sec
TQO      1
SFO1     400.2324014 MHz
NUC1      1H
PC       4.70 usec
PI       14.38 usec
P181     19.18000031 W

F2 - Processing parameters
SI       14384
SF       400.2350115 MHz
WDW      EM
SSB      0
LB       0.30 Hz
GB       0
PC       1.00
    
```

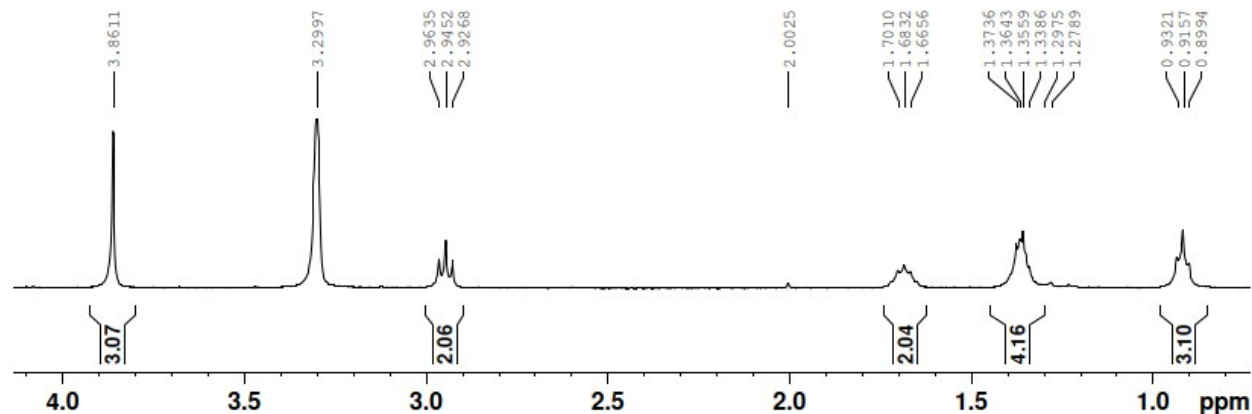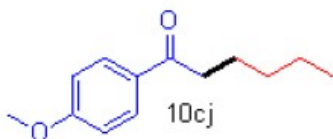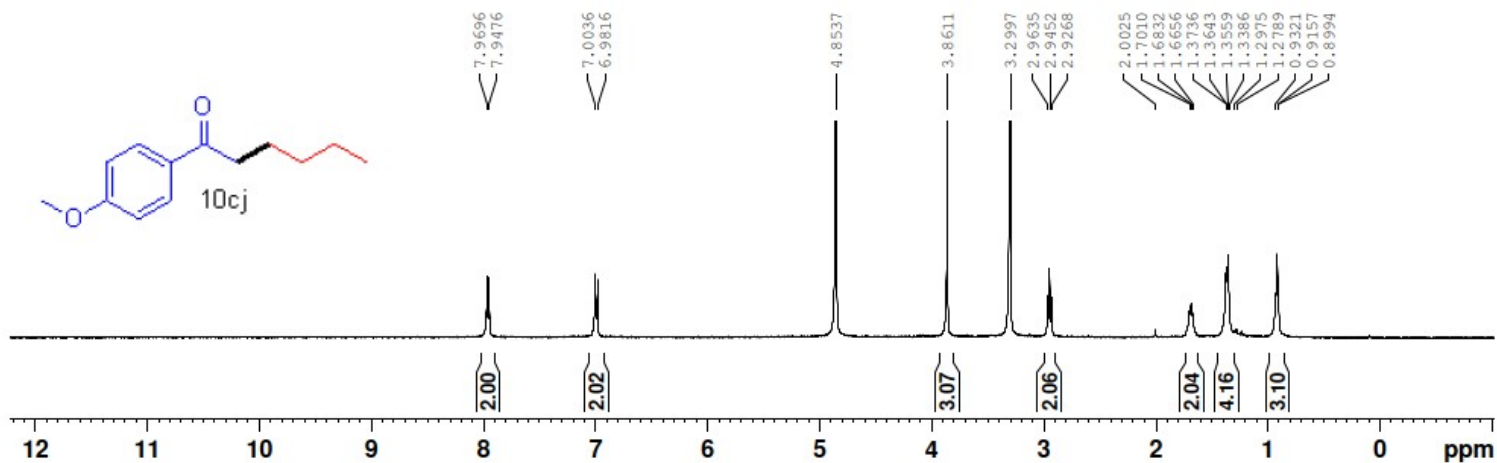

10da IN DMSO

```

Current Data Parameters
NAME 10da
EXPNO 10
PROCNO 1
F2 - Acquisition Parameters
Date_ 20230112
Time 0:17 h
INSTRUM spect
PROBHD 110440 0173 1
PULPROG zgpg
TD 2474
SOLVENT DMSO
SI 0
SF 400.146
DE 0
AQ 0.021800000
RG 320
SQ 0.000000000
WDW EM
SSB 0
LB 0.000000000
GB 0
PC 1.00
F2 - Processing parameters
SI 12896
SF 400.146000000 MHz
WDW EM
SSB 0
LB 0.000000000
GB 0
PC 1.00
  
```

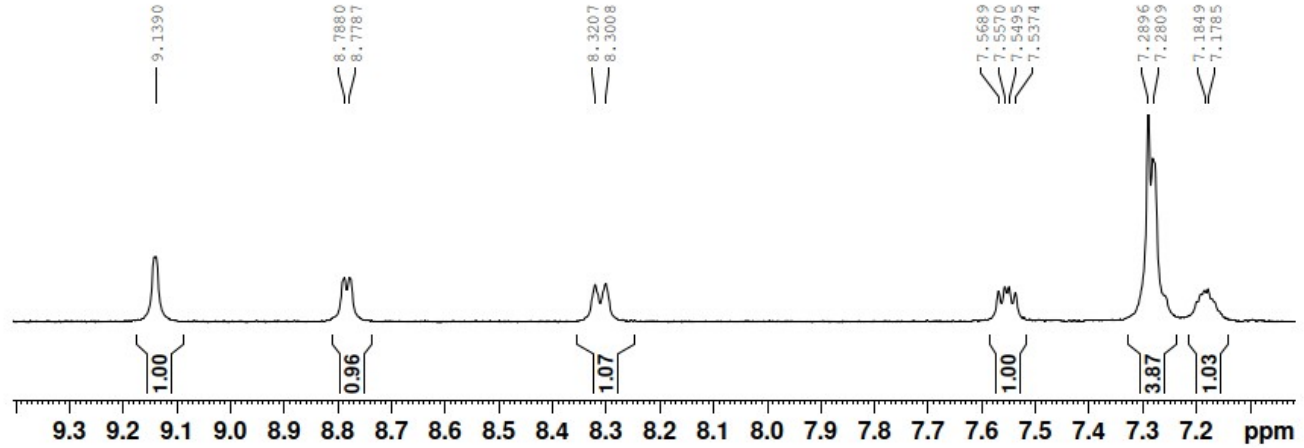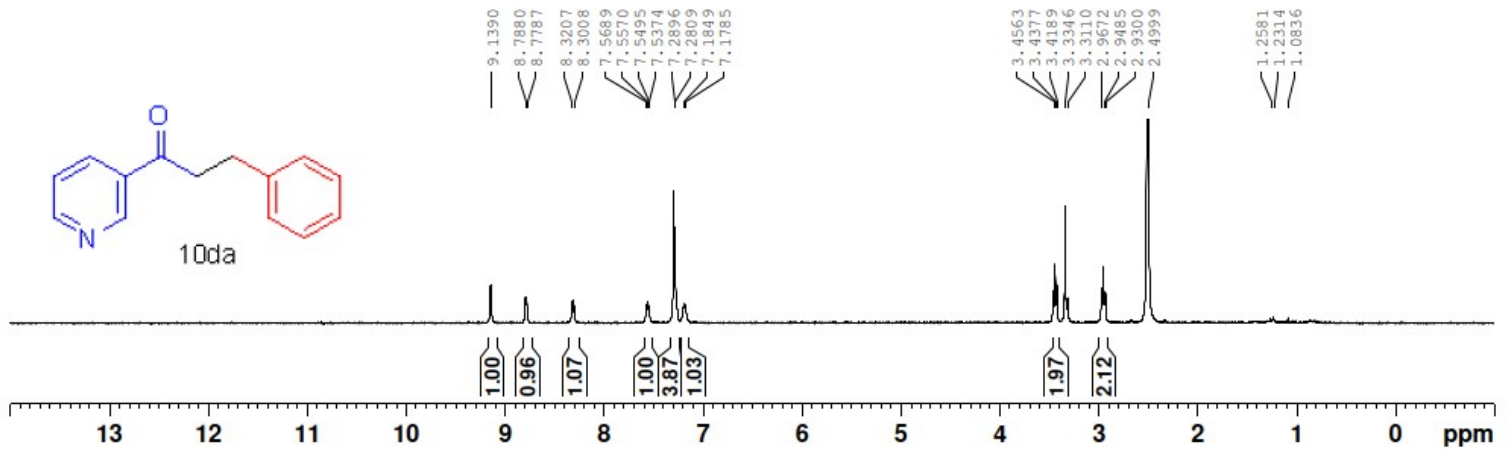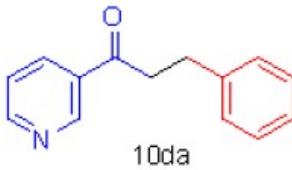

10ea IN DMSO

```

Current Data Parameters
NAME      10ea
EXPNO    10
PROCNO   1

F2 - Acquisition Parameters
Date_    20230119
Time     23.47 h
INSTRUM  spect
PROBHD   z104450_0373 (
PULPROG  zg30
TD       24634
SOLVENT  DMSO
NS       8
DS       0
SWH      8012.820 Hz
FIDRES   0.666735 Hz
AQ       1.4998465 sec
RG       181
CW       62.400 usec
DE       6.50 usec
TE       300.0 K
D1       1.00000000 sec
TDO      1
SFO1     400.2324014 MHz
NUC1     13
PC       5.00 usec
P1       15.00 usec
PLM1     10.00000000 W

F2 - Processing parameters
SI       16384
SF       400.2300026 MHz
SCW      0
SGB      0
LB       0.30 Hz
GB       0
PC       1.00
    
```

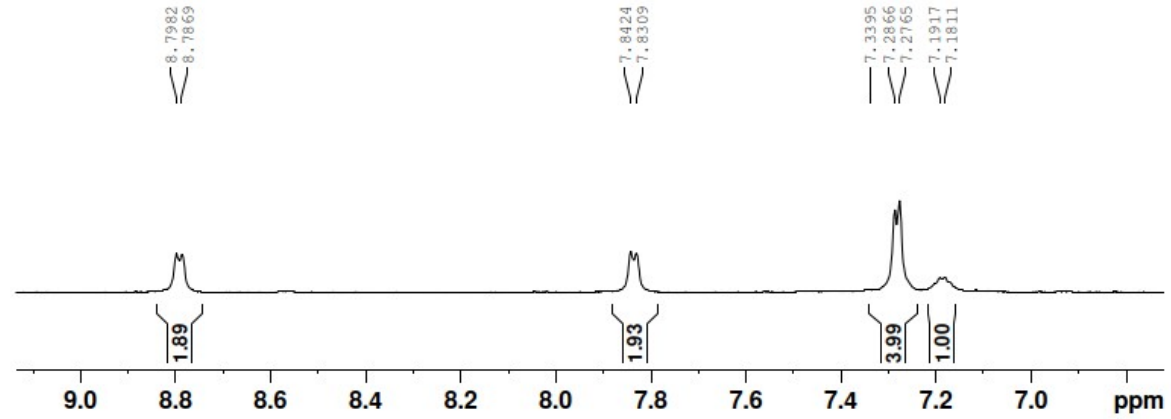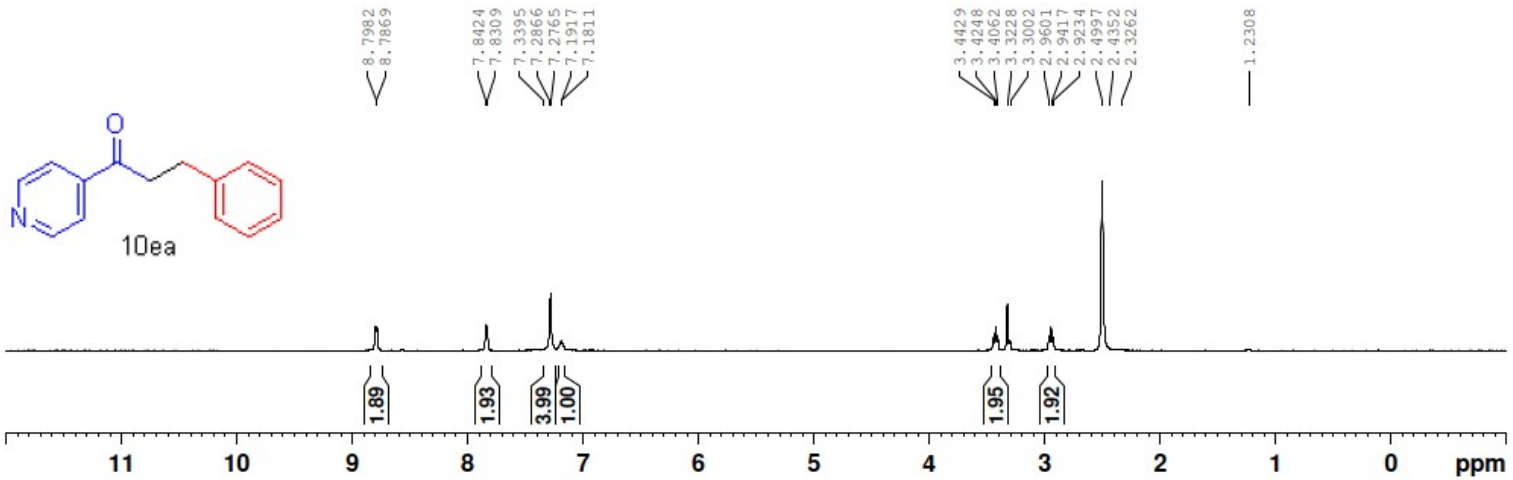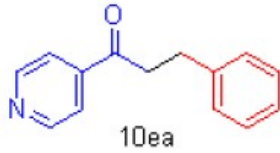

10fa IN CDC13

Current Data Parameters  
 NAME 10fa  
 EXPRO 10  
 FPCNO 1

F2 - Acquisition Parameters  
 Date 20230112  
 Time 18.23 h  
 INSTRUM spect  
 PROBHD E104450\_0373 (   
 PULPROG zg30  
 TD 24576  
 SOLVENT CDC13  
 NS 8  
 DS 0  
 SWS 8012.820 Hz  
 FIDRES 0.652085 Hz  
 AQ 1.1335424 sec  
 RG 203  
 DW 62.400 usec  
 DE 6.50 usec  
 TE 300.0 K  
 SI 1.00000000 sec  
 TDO  
 SFO1 400.2324014 MHz  
 NUC1 1H  
 PC 5.00 usec  
 P1 15.00 usec  
 PL1 10.00000000 W

F2 - Processing parameters  
 SI 16384  
 SF 400.2300132 MHz  
 MW SW  
 SSB 0  
 LB 0.30 Hz  
 GB 0  
 PC 1.00

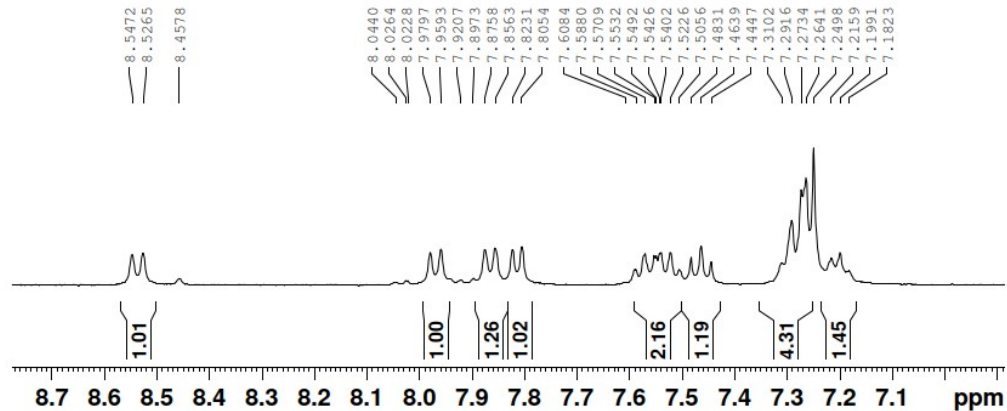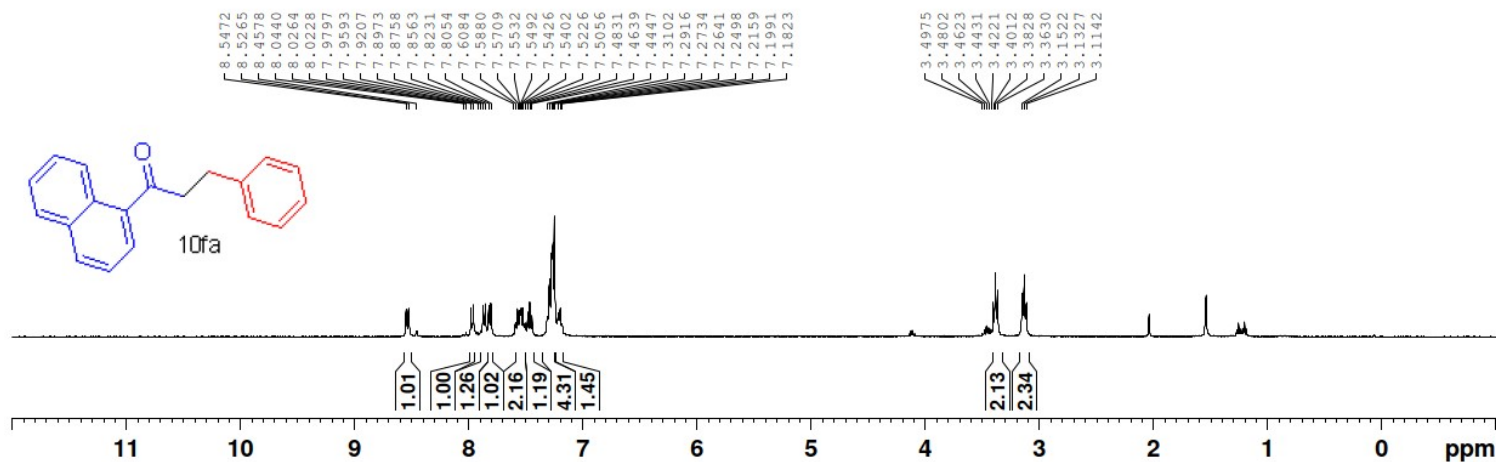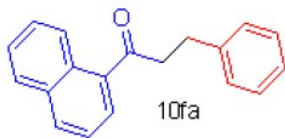

10fm IN DMSO

```

Current Data Parameters
NAME 10fm
EXPNO 10
PROCNO 1
F2 - Acquisition Parameters
Date_ 20230113
Time 2:59 h
INSTRUM spect
PROBHD 1104450_0373 (
PULPROG zg20
TD 24576
SOLVENT DMSO
NS 8
DS 0
SWH 8012.820 Hz
FIDRES 0.452085 Hz
AQ 1.5335424 sec
RG 203
DM 62.400 usec
DE 6.50 usec
TE 300.0 K
D1 0.000 sec
D2 1.000 sec
SFO1 400.2324014 MHz
NUC1 13
P1 4.79 usec
P2 14.38 usec
SFO2 19.18000031 M
F2 - Processing parameters
SI 16384
SF 400.2300025 MHz
WDW EM
SSB 0
LA 0.30 Hz
GB 0
PC 1.00
    
```

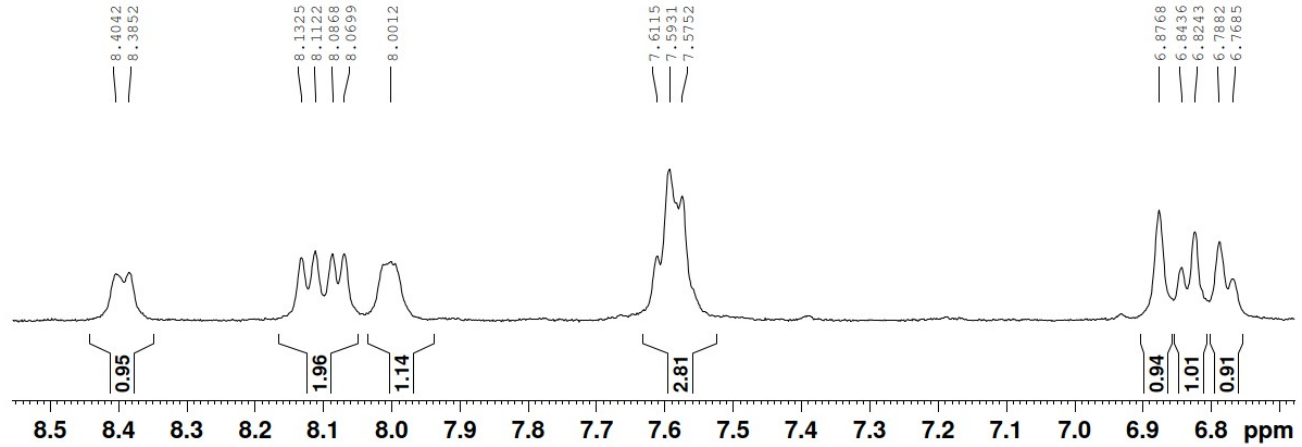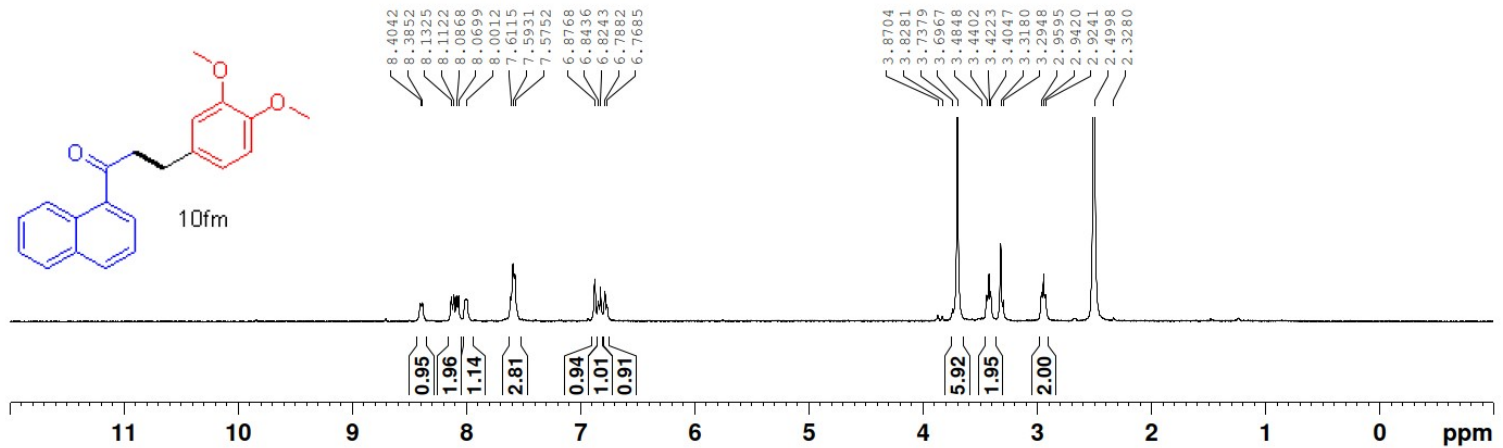



10da' IN DMSO

```

Current Data Parameters
NAME 10da'
EXPNO 10
PROCNO 1
F2 - Acquisition Parameters
Date_ 20230112
Time 0.15 h
INSTRUM spect
PROBHD 1104450_0771
PULPROG zg30
TD 24576
SOLVENT DMSO
NS 8
DS 8
SWH 8012.820 Hz
FIDRES 0.432085 Hz
AQ 1.5335424 sec
RG 203
SW 62.400 usec
DE 6.50 usec
TE 300.0 K
D1 0.00 sec
TSD 1
SFO1 400.2324014 MHz
NUC1 13
PC 10.00 usec
SI 10.00 usec
SF 400.2300225 MHz
WDW EM
SSB 0
LB 0.30 Hz
GB 0
PC 1.00
    
```

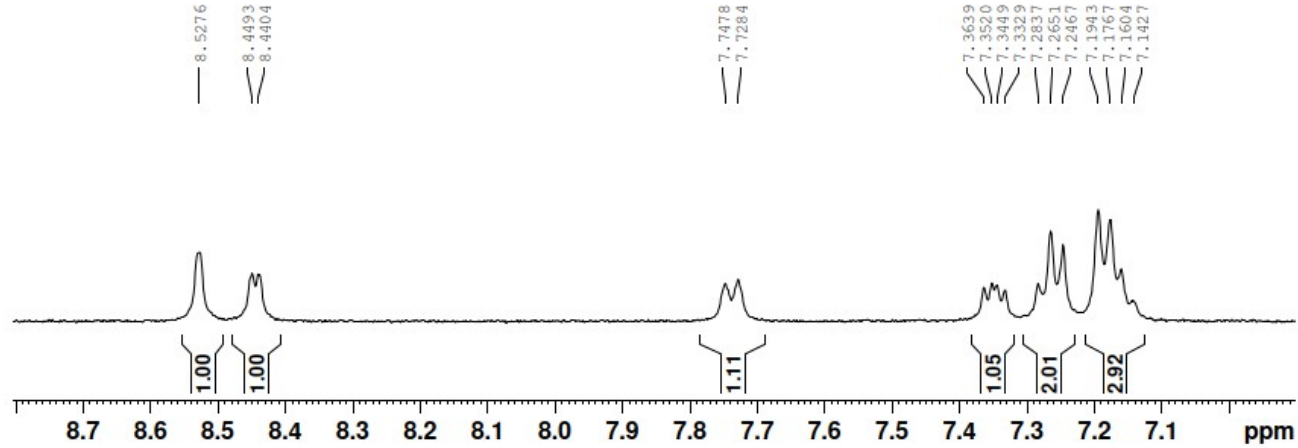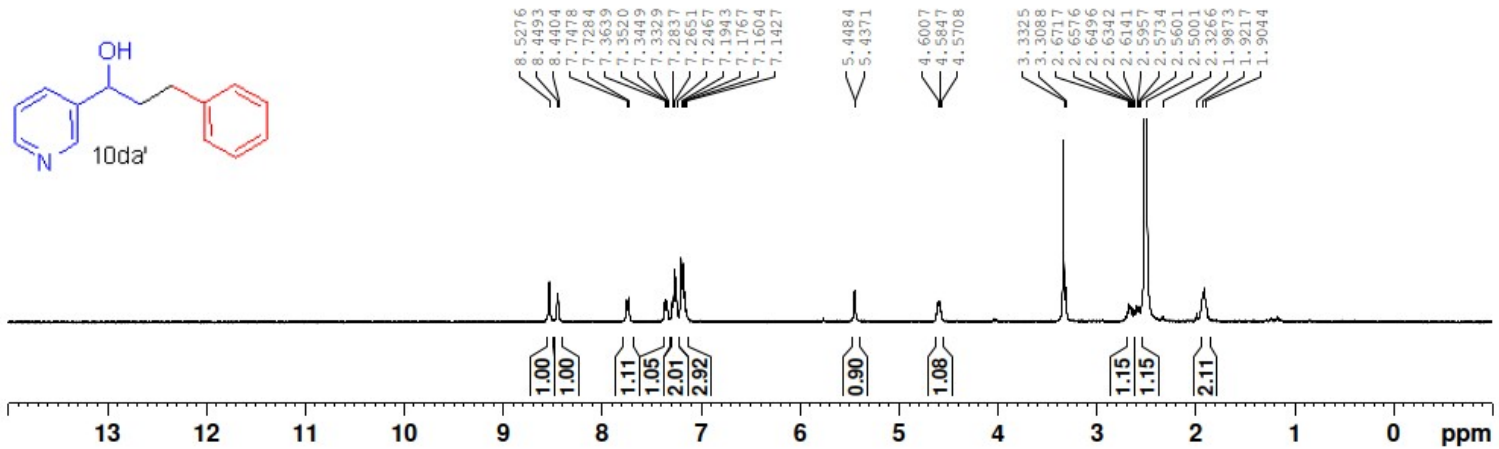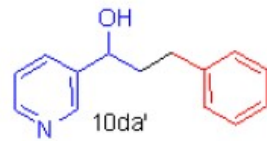

10ea' IN DMSO

```

Current Data Parameters
NAME      10ea'
EXPNO    10
PROCNO   1

F2 - Acquisition Parameters
Date_    20230112
Time     19.34 h
INSTRUM  spect
PROBHD   E104450_0373 (
PULPROG  zg30
TD        65536
SOLVENT  DMSO
NS        8
DS        0
SWH       8012.820 Hz
FIDRES   0.652085 Hz
AQ        1.5335424 sec
RG        203
CW        42.400 usec
DE        4.50 usec
TE        300.0 K
SI        1.00000000 sec
TQD       1
SFO1     400.2324014 MHz
NUC1      1H
PC        5.00 usec
PI        15.00 usec
PL1      10.00000000 dB

F2 - Processing parameters
SI        14384
SF        400.2350026 MHz
WDW       EM
SSB       0
LB        0.30 Hz
GB        0
PC        1.00
    
```

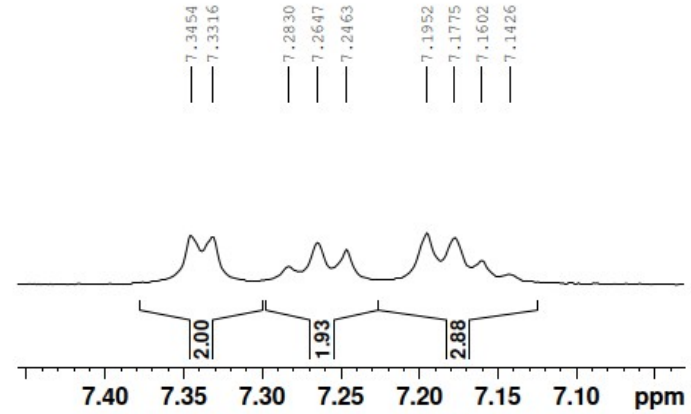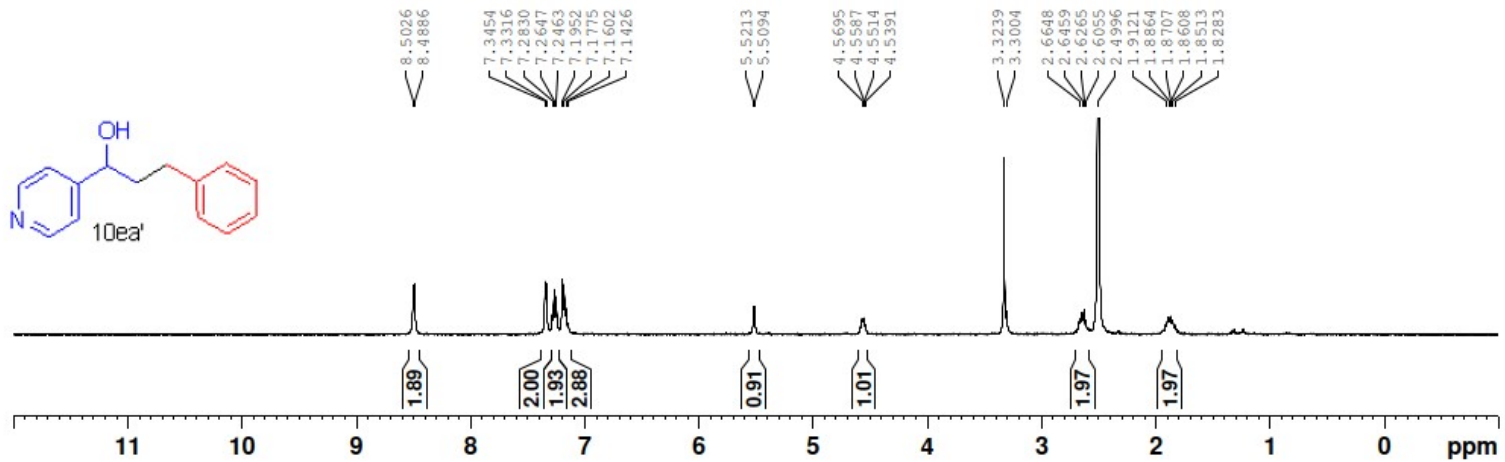

12aa IN MeOD

Current Data Parameters  
 NAME 12aa  
 EXPRO 10  
 PROCNO 1

F2 - Acquisition Parameters  
 Date\_ 20230125  
 Time 0.02 h  
 INSTRUM spect  
 PROBRD E104450\_0373 (   
 PULPROG zg30  
 TD 24036  
 SOLVENT MeOD  
 NS 8  
 DS 0  
 SWH 8012.820 Hz  
 FIDRES 0.664735 Hz  
 AQ 1.4399465 sec  
 RG 203  
 CW 42.400 usec  
 DE 4.50 usec  
 TE 300.0 K  
 SI 0 sec  
 TDO 1  
 SFO1 400.2324014 MHz  
 SDC1 18  
 PG 5.00 usec  
 PI 15.00 usec  
 P181 10.00000000 sec

F2 - Processing parameters  
 SI 14384  
 SF 400.2320115 MHz  
 NMR KW  
 SSB 0  
 LB 0.30 Hz  
 GB 0  
 PC 1.00

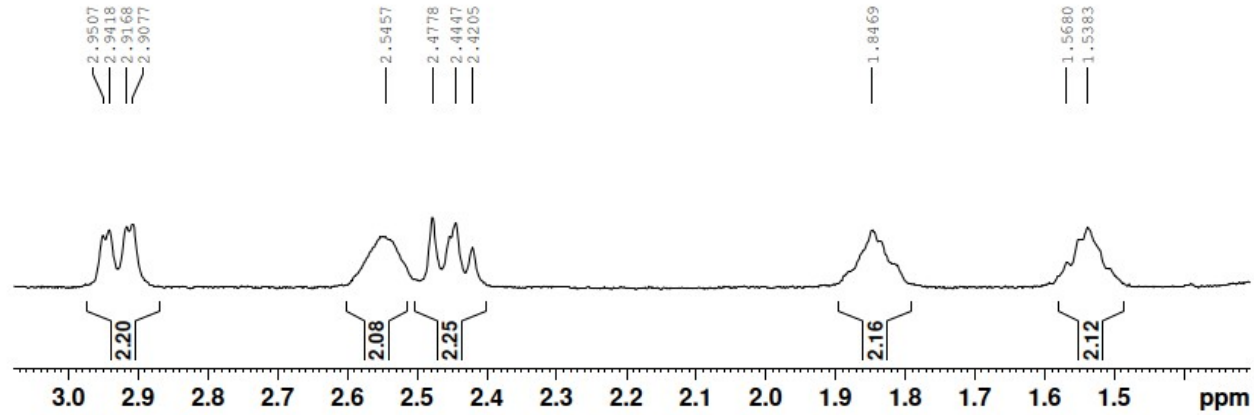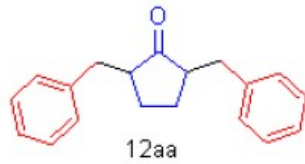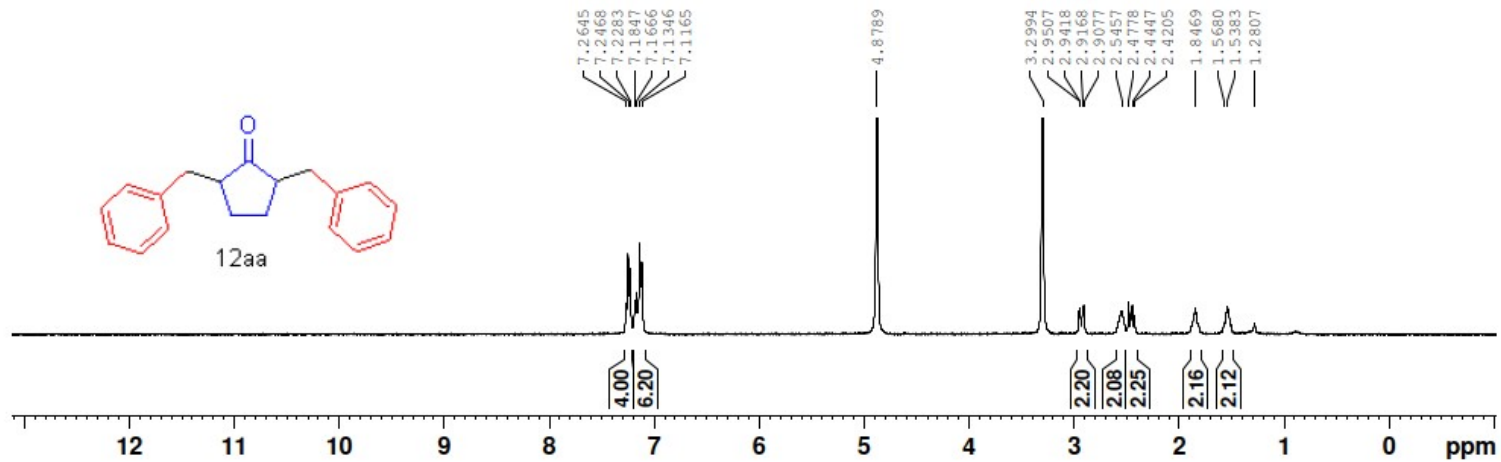

12aa IN CDCl3

```

Current Data Parameters
NAME      12aa
EXPNO    10
PROCNO   1
-----
F2 - Acquisition Parameters
Date_    2020106
Time     18.15 h
INSTRUM  Avance Neo
PROBHD   1H3739_0446 (
PULPROG  zgpg
TD        65536
SOLVENT  CDCl3
NS        8
DS        4
SWH       8196.722 Hz
FIDRES    0.667051 Hz
AQ        1.4951360 sec
RG        101
SWH        61.000 usec
DE        12.89 usec
TE        295.1 K
D1         0 sec
TSD        1
SFO1      400.324019 MHz
NUC1      13C
P2         2.07 usec
PT         0.00 usec
PL1        21.41000061 dB
-----
F2 - Processing parameters
SI        16384
SF        400.320129 MHz
WDW        EM
SSB        0
LB         0.30 Hz
GB         0
PC         1.00
    
```

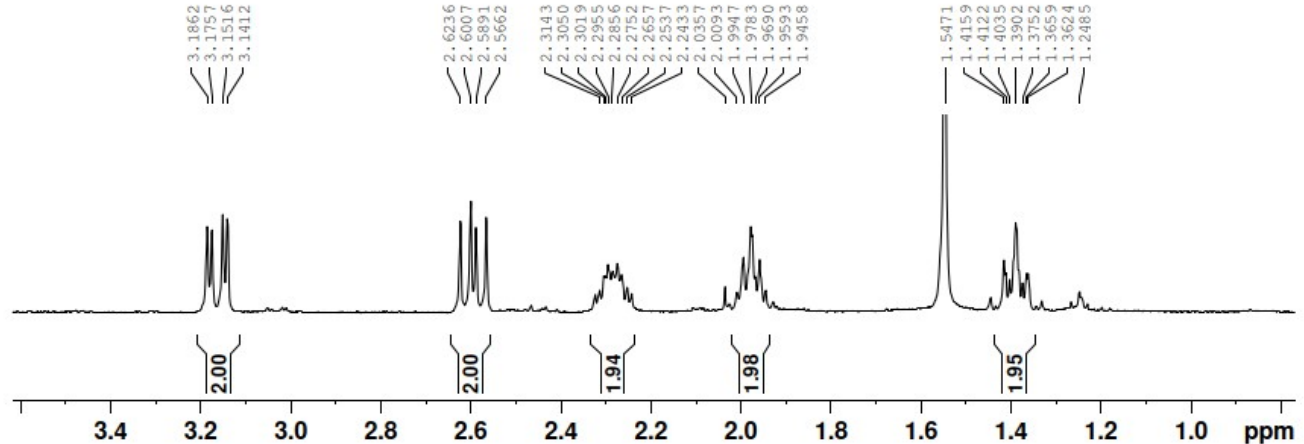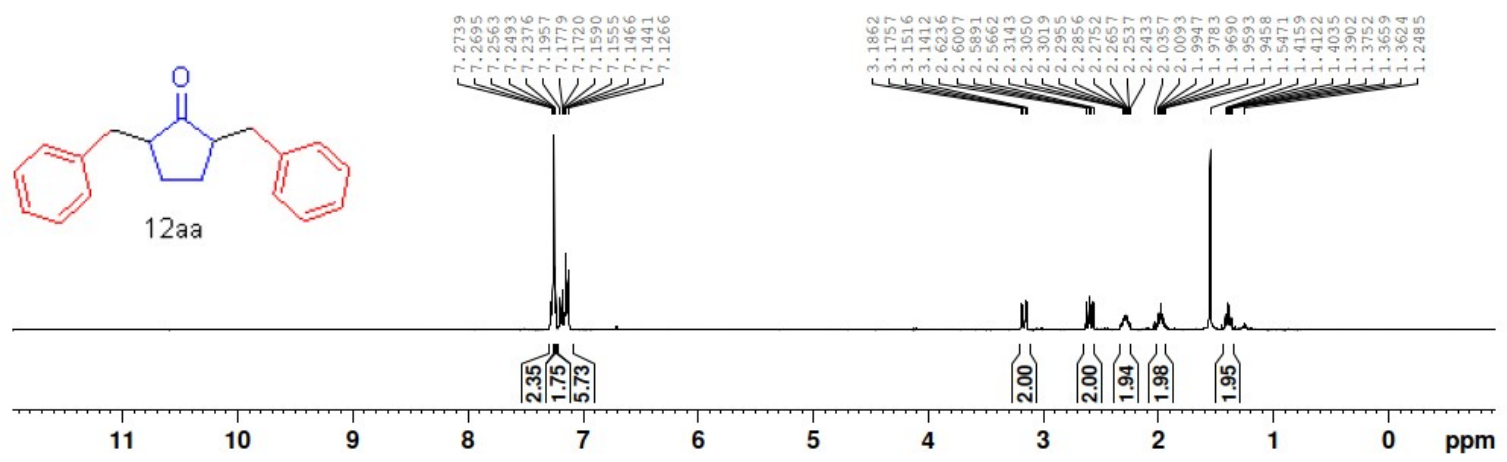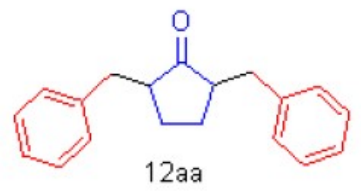

12ab IN MeOD

Current Data Parameters  
 NAME 12ab  
 EXPRO 10  
 PROCNO 1

F2 - Acquisition Parameters  
 Date 20230216  
 Time 10.52 h  
 INSTRUM spect  
 PROBHD E104450\_0373 (   
 PULPROG zg30  
 TD 24036  
 SOLVENT MeOD  
 NS 8  
 DS 0  
 SWS 8012.820 Hz  
 FIDRES 0.666735 Hz  
 AQ 1.4998465 sec  
 RG 28.5  
 DW 62.400 usec  
 DE 6.50 usec  
 TE 300.0 K  
 SI 1.00000000 sec  
 TDO  
 SFO1 400.2324014 MHz  
 NUC1 1H  
 PC 4.79 usec  
 P1 14.38 usec  
 P1M1 19.18000031 u

F2 - Processing parameters  
 SI 16384  
 SF 400.2300116 MHz  
 NH 5  
 SSB 0  
 LB 0.30 Hz  
 GB 0  
 PC 1.00

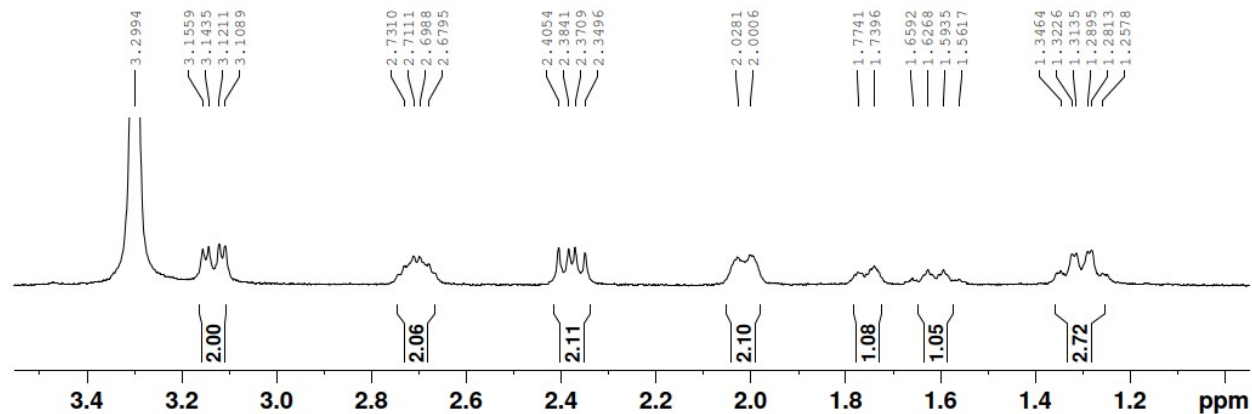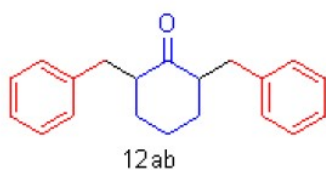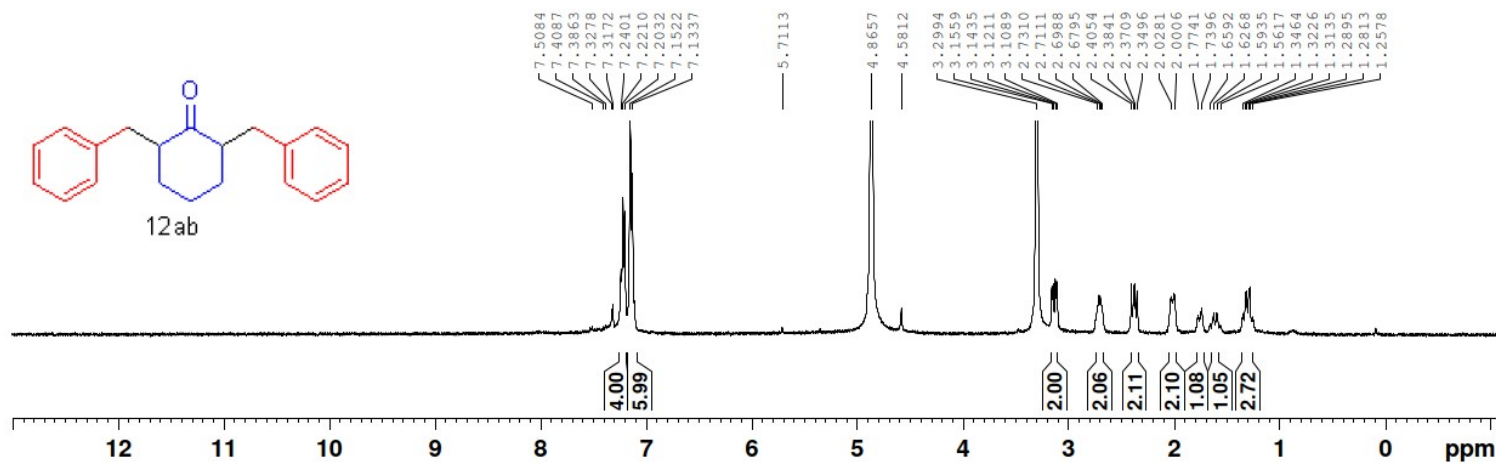

12ac IN MeOD

Current Data Parameters  
 NAME 12ac  
 EXPNO 10  
 PROCNO 1

F2 - Acquisition Parameters  
 Date\_ 20230118  
 Time 16.15 h  
 INSTRUM spect  
 PROBRD BBO4450\_0373 (1  
 PULPROG zg30  
 TD 24036  
 SOLVENT MeOD  
 NS 8  
 DS 0  
 SWH 8012.820 Hz  
 FIDRES 0.644725 Hz  
 AQ 1.4999465 sec  
 RG 203  
 CW 42.400 usec  
 DE 4.50 usec  
 TE 300.0 K  
 SI 1.00000000 sec  
 TDO 1  
 SFO1 400.2324014 MHz  
 NUC1 1H  
 PG 5.00 usec  
 P1 10.00 usec  
 P1R1 10.00000000 sec

F2 - Processing parameters  
 SI 14384  
 SF 400.2324014 MHz  
 WDW EM  
 SSB 0  
 LB 0.30 Hz  
 GB 0  
 PC 1.00

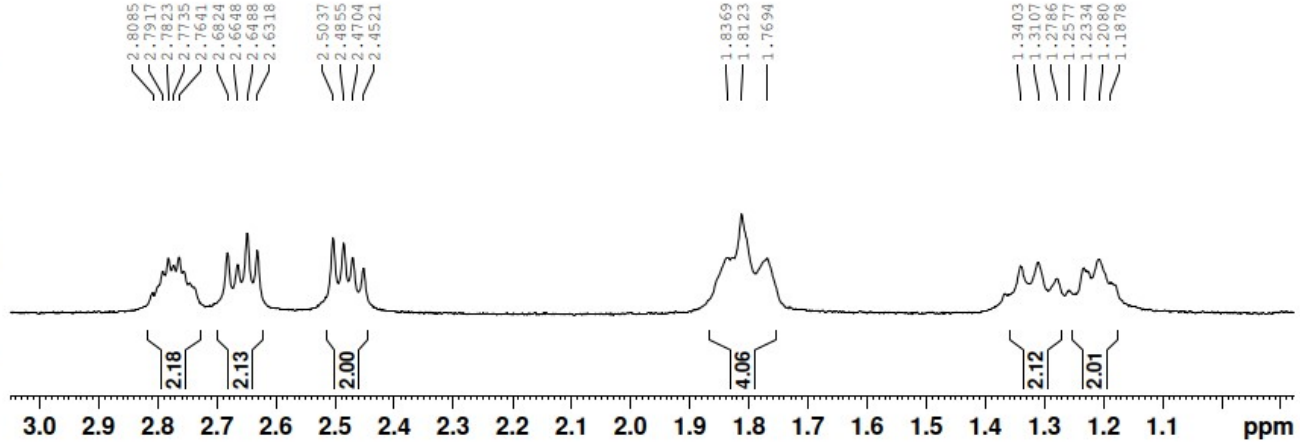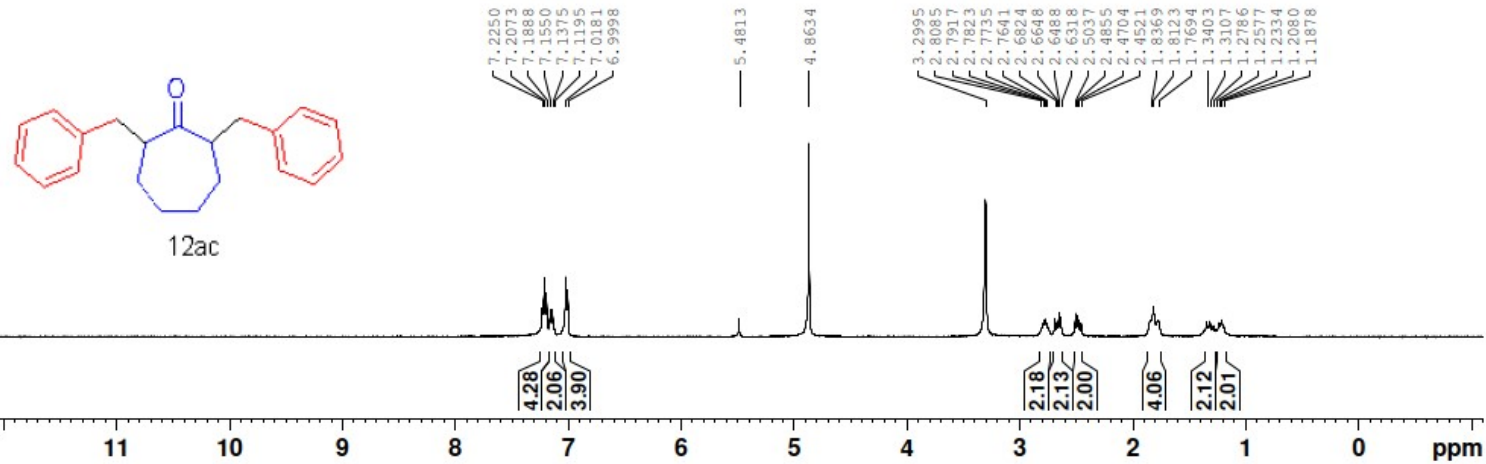

12ac' IN MeOD

```

Current Data Parameters
NAME      12ac'
EXPNO    10
PROCNO   1

F2 - Acquisition Parameters
Date_    20230128
Time     7.26 h
INSTRUM  Avance Neo
PROBHD   Z163739_0446 (
PULPROG  zg30
TD        24576
SOLVENT  MeOD
NS        8
DS        0
SWE       8196.122 Hz
FIDRES   0.467051 Hz
AQ        1.4991360 sec
RG        101
DW        61.000 usec
DE        13.89 usec
TE        295.2 K
D1        1.00000000 sec
TD0       1
SFO1     400.3224019 MHz
NUC1     13C
P0        2.67 usec
P1        8.00 usec
SFO1     21.6100061 MHz

F2 - Processing parameters
SI        16384
SF        400.3200117 MHz
WDW       EM
SSB       0
GB        0.30 Hz
PC        1.00
    
```

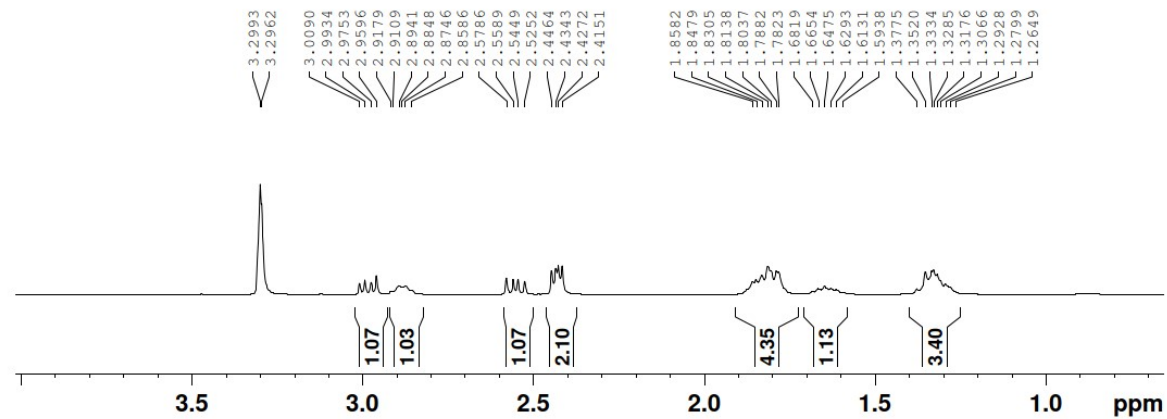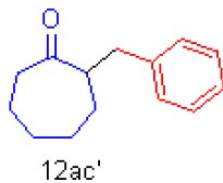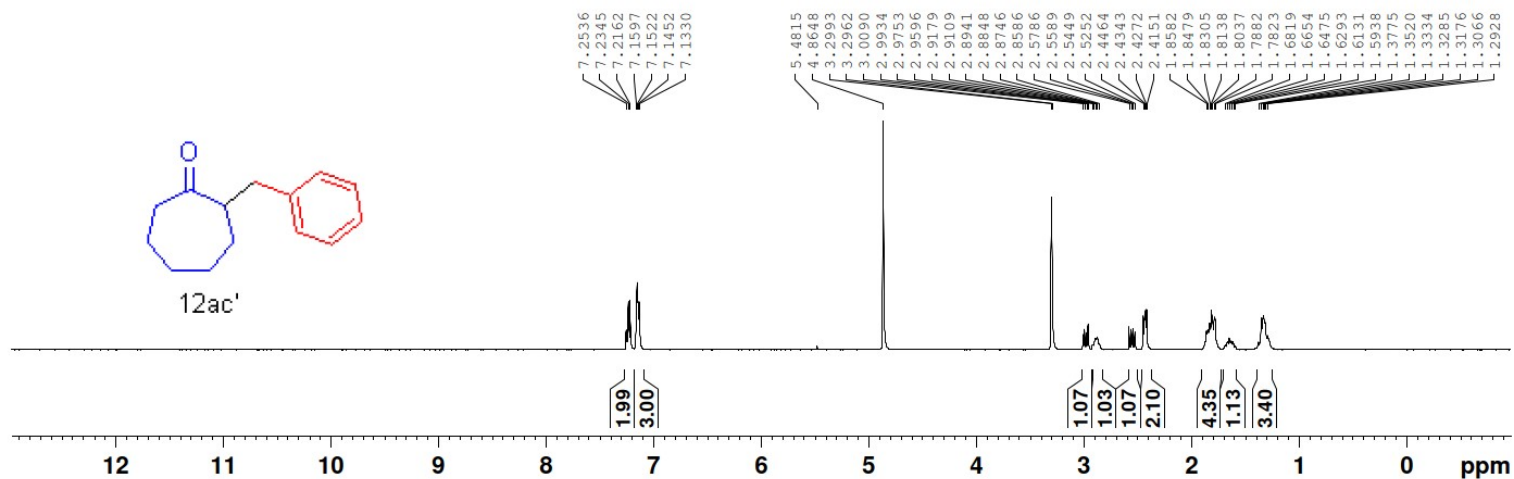

12ad IN MeOD

```

Current Data Parameters
NAME      12ad
EXPNO     10
PROCNO    1

F2 - Acquisition Parameters
Date_     20230125
Time      19.24 h
INSTRUM   spect
PROBHD    E104450_0373 (
PULPROG   zg30
TD         24036
SOLVENT   MeOD
NS         8
DS         0
SWH        8012.820 Hz
FIDRES     0.644735 Hz
AQ         1.4399465 sec
RG         64
CW         62.400 usec
DE         6.50 usec
TE         300.0 K
SI         1.00000000 sec
TQD        1
SFO1       400.2324014 MHz
NUC1        13
PC         5.00 usec
PI         15.00 usec
P181       10.00000000 W

F2 - Processing parameters
SI         14384
SF         400.23240115 MHz
WDW        EM
SSB        0
LB         0.30 Hz
GB         0
PC         1.00
    
```

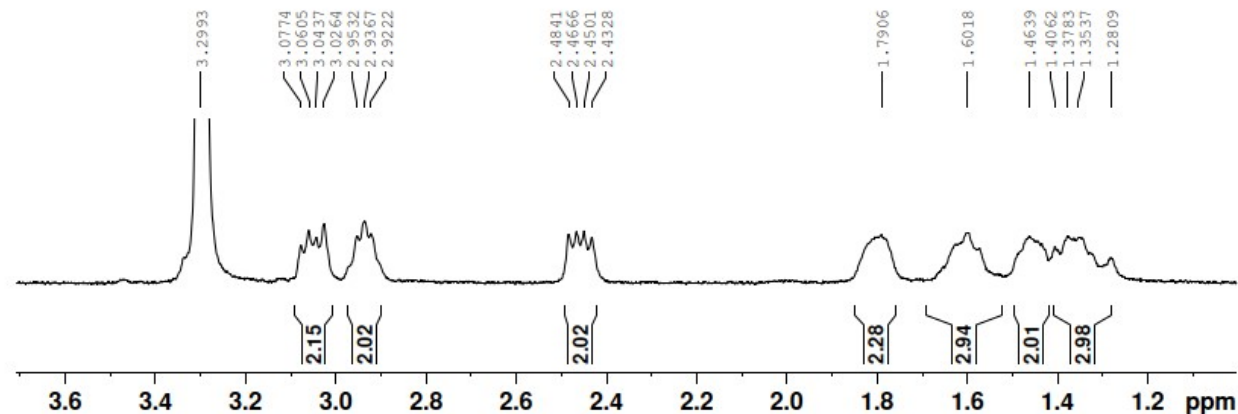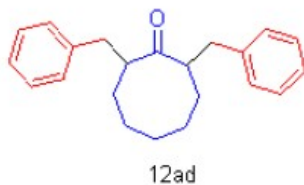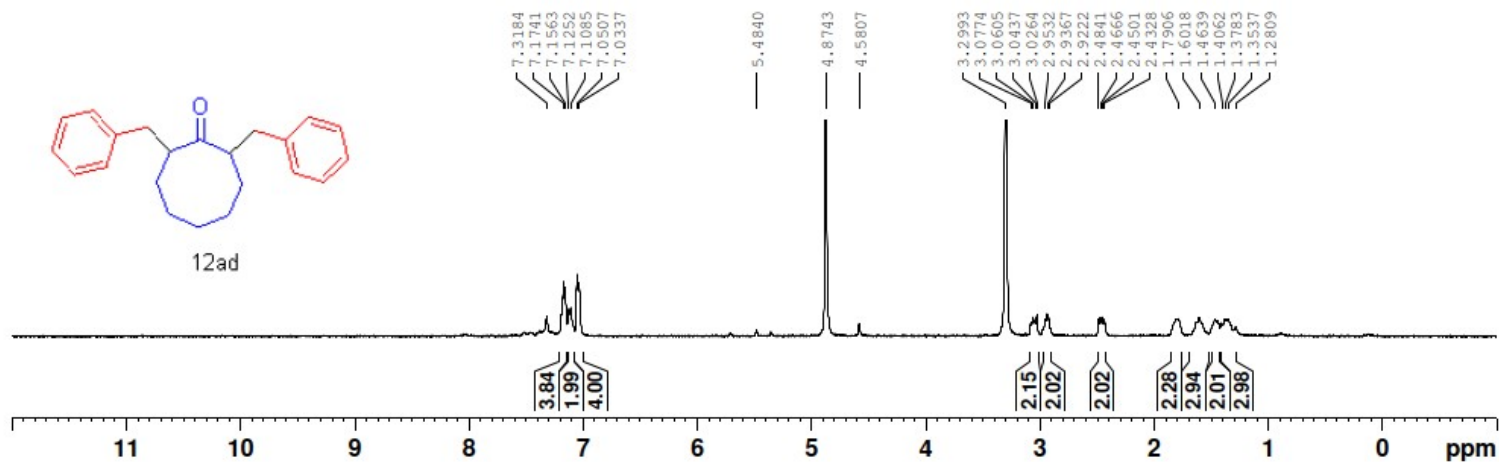



12ad' IN MeOD

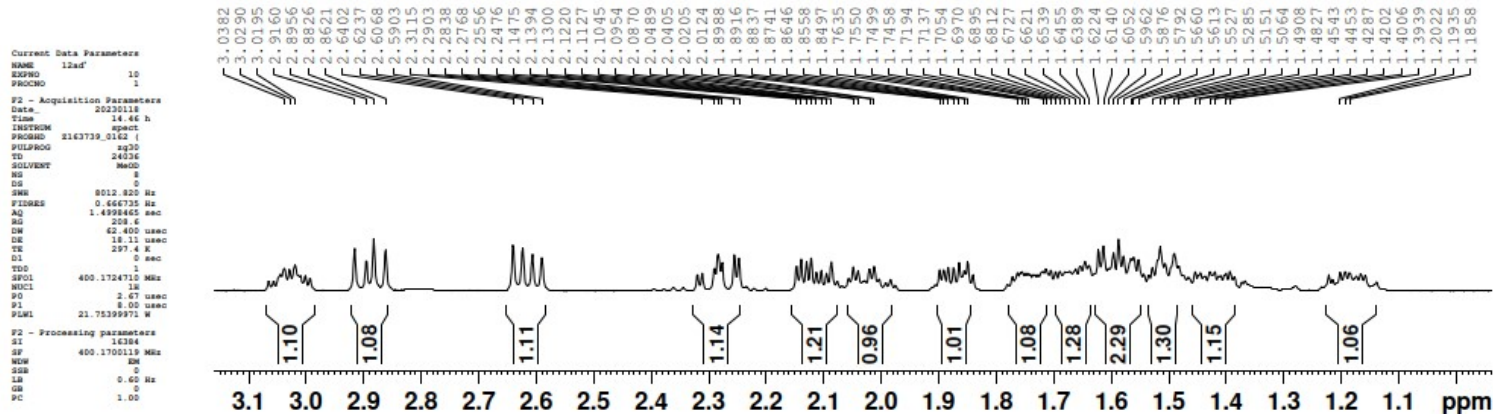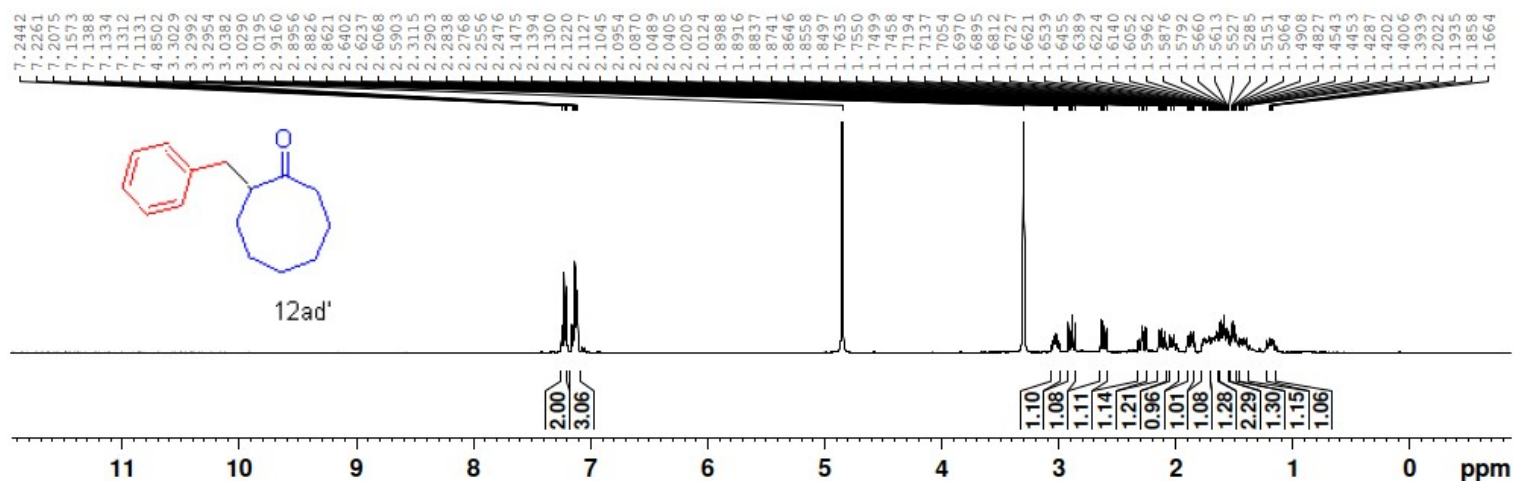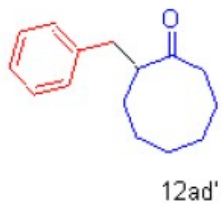

```

Current Data Parameters
NAME 12da'
EXPNO 11
PROCNO 1

F2 - Acquisition Parameters
Date_ 20230309
Time 21:07 h
INSTRUM Avance
PROBHD 1163739_0713 (
PULPROG zg30
TD 24576
SOLVENT DMSO
NS 16
DS 0
SWH 10000.000 Hz
FIDRES 0.513802 Hz
AQ 1.2288001 sec
RG 101
DN 50.000 usec
DE 11.14 usec
TE 300.2 K
D1 0 sec
TD0 1
SFO1 400.6024737 MHz
NUC1 1H
PC 2.87 usec
PI 8.00 usec
PLM1 24.03499985 W

F2 - Processing parameters
SI 65536
SF 400.6000048 MHz
WDW EM
SSB 0
LB 0.30 Hz
GB 0
PC 1.00

```

12da' IN DMSO AT 100 DEG C

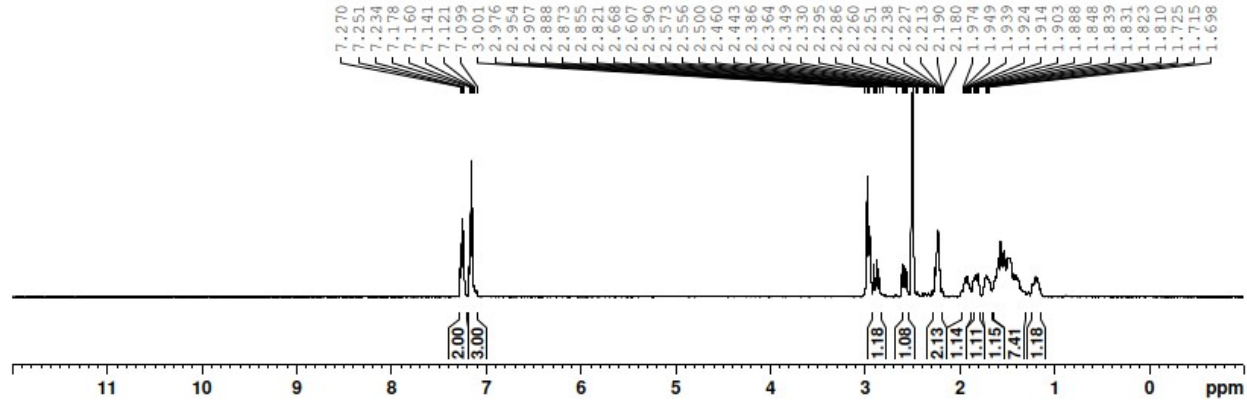

```

Current Data Parameters
NAME 12da'
EXPNO 10
PROCNO 1

F2 - Acquisition Parameters
Date_ 20230309
Time 11:35 h
INSTRUM Avance
PROBHD 1163739_0713 (
PULPROG zg30
TD 24576
SOLVENT DMSO
NS 16
DS 0
SWH 10000.000 Hz
FIDRES 0.813802 Hz
AQ 1.2288001 sec
RG 101
DN 50.000 usec
DE 11.14 usec
TE 298.1 K
D1 0 sec
TD0 1
SFO1 400.6024737 MHz
NUC1 1H
PC 2.87 usec
PI 8.00 usec
PLM1 24.03499985 W

F2 - Processing parameters
SI 65536
SF 400.6000048 MHz
WDW EM
SSB 0
LB 0.30 Hz
GB 0
PC 1.00

```

12da' IN DMSO AT 20 DEG C

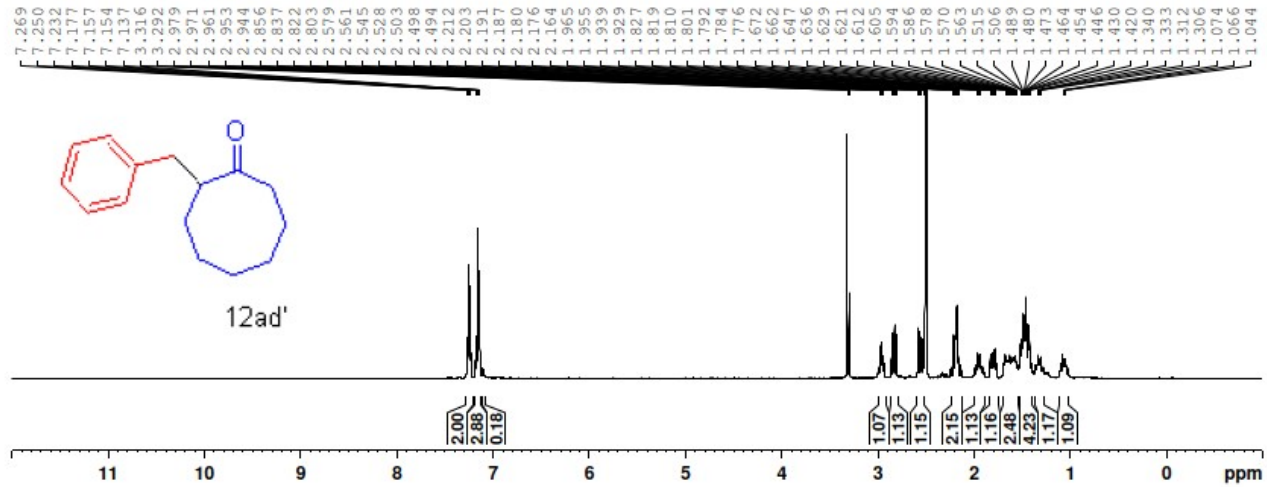

```

Current Data Parameters
NAME      12da'
EXPNO     11
PROCNO    1
F2 - Acquisition Parameters
Date_     20230309
Time      21.07 h
INSTRUM   Avance
PROBHD    Z163739_0713 (
PULPROG   zg30
TD         24576
SOLVENT   DMSO
NS         16
DS         0
SWH        10000.000 Hz
FIDRES     0.813802 Hz
AQ         1.2288001 sec
RG         101
DW         50.000 usec
DE         11.14 usec
TE         373.2 K
D1         0 sec
TDO        1
SFO1       400.6024737 MHz
NUC1       1H
PC         2.67 usec
PL1        8.00 usec
PLW1       24.03499985 W
F2 - Processing parameters
SI         65536
SF         400.6000048 MHz
WDW        EM
SSB        0
LB         0.30 Hz
GB         0
PC         1.00

```

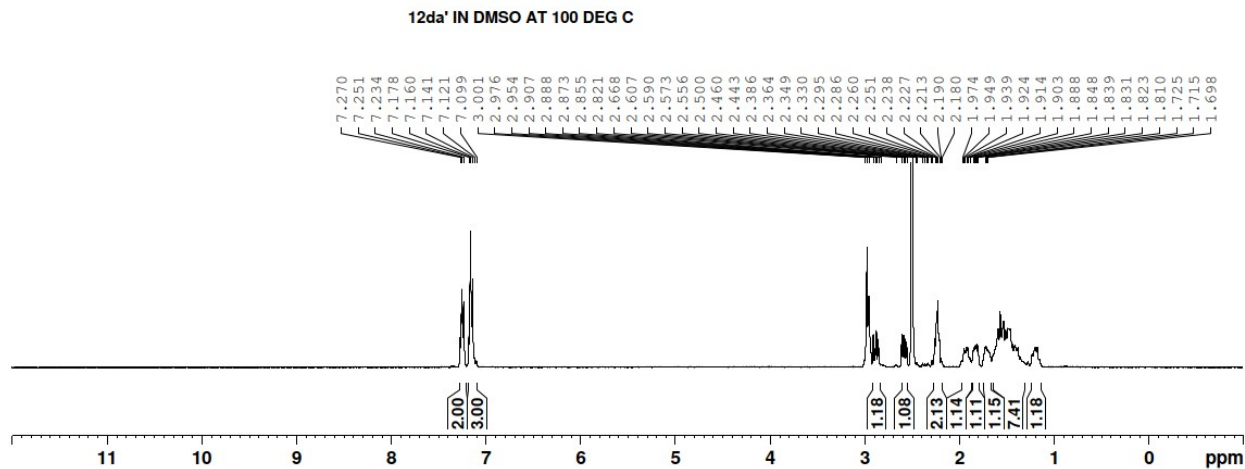

```

Current Data Parameters
NAME      12da'
EXPNO     10
PROCNO    1
F2 - Acquisition Parameters
Date_     20230309
Time      11.35 h
INSTRUM   Avance
PROBHD    Z163739_0713 (
PULPROG   zg30
TD         24576
SOLVENT   DMSO
NS         16
DS         0
SWH        10000.000 Hz
FIDRES     0.813802 Hz
AQ         1.2288001 sec
RG         101
DW         50.000 usec
DE         11.14 usec
TE         298.1 K
D1         0 sec
TDO        1
SFO1       400.6024737 MHz
NUC1       1H
PC         2.67 usec
PL1        8.00 usec
PLW1       24.03499985 W
F2 - Processing parameters
SI         65536
SF         400.6000048 MHz
WDW        EM
SSB        0
LB         0.30 Hz
GB         0
PC         1.00

```

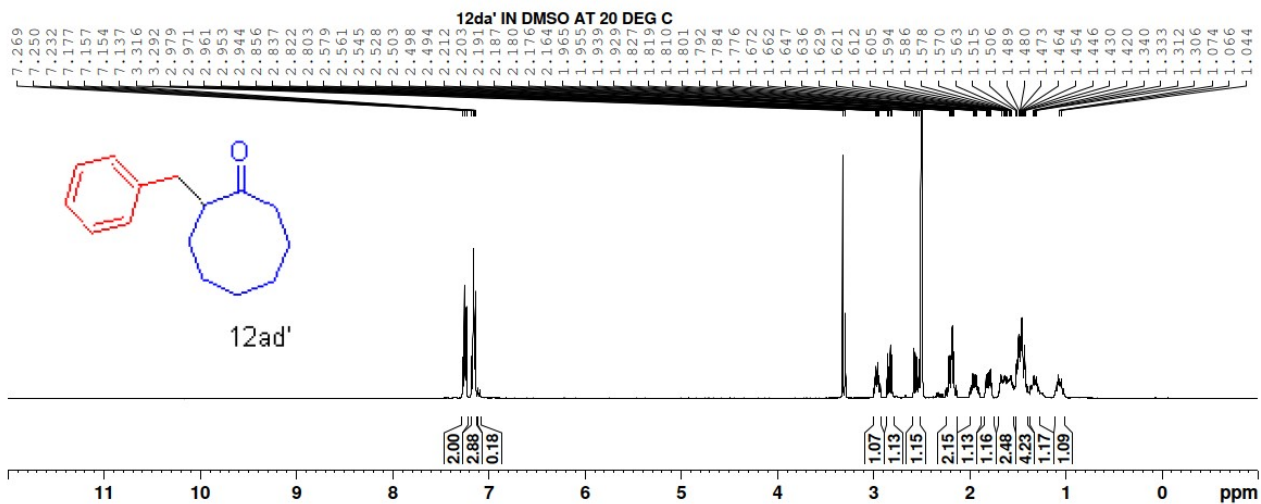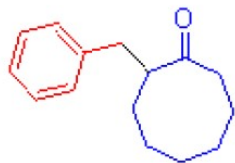

12ad'

```

Current Data Parameters
NAME      12da'
EXPNO    11
PROCNO   1

F2 - Acquisition Parameters
Date_    20230309
Time     21:07 h
INSTRUM  Avance
PROBHD   2163739_0713 (
PULPROG  zg30
TD        24576
SOLVENT  DMSO
NS        16
DS        0
SWH       10000.000 Hz
FIDRES    0.813802 Hz
AQ        1.2288001 sec
RG        101
DW         50.000 usec
DE         11.14 usec
TE        373.2 K
D1         0 sec
TDO       1
SFO1      400.6024737 MHz
NUC1      1H
PC        2.67 usec
P1         8.00 usec
PLW1      24.03499985 W

F2 - Processing parameters
SI        65536
SF        400.6000048 MHz
WDW       EM
SSB       0
LB        0.30 Hz
GB        0
PC        1.00

```

12da' IN DMSO AT 100 DEG C

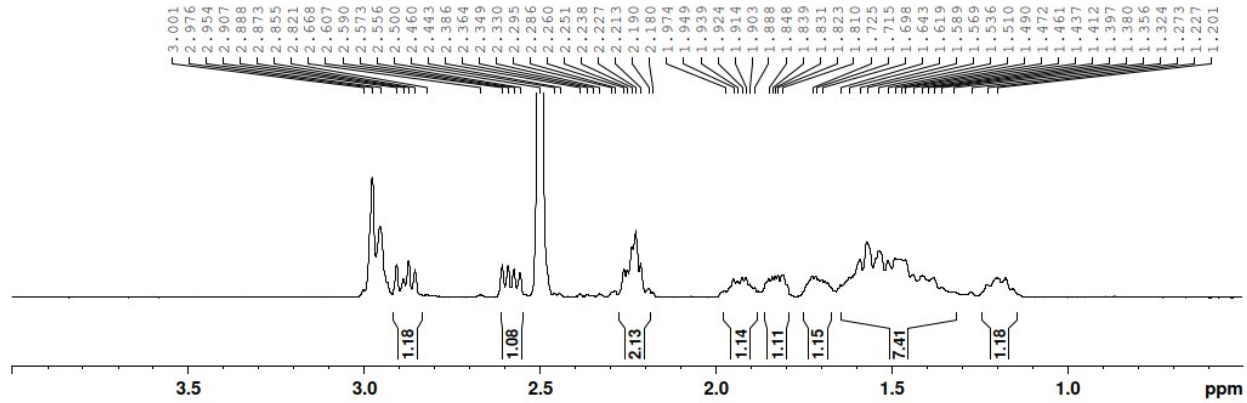

```

Current Data Parameters
NAME      12da'
EXPNO    10
PROCNO   1

F2 - Acquisition Parameters
Date_    20230309
Time     11:35 h
INSTRUM  Avance
PROBHD   2163739_0713 (
PULPROG  zg30
TD        24576
SOLVENT  DMSO
NS        16
DS        0
SWH       10000.000 Hz
FIDRES    0.813802 Hz
AQ        1.2288001 sec
RG        101
DW         50.000 usec
DE         11.14 usec
TE        298.1 K
D1         0 sec
TDO       1
SFO1      400.6024737 MHz
NUC1      1H
PC        2.67 usec
P1         8.00 usec
PLW1      24.03499985 W

F2 - Processing parameters
SI        65536
SF        400.6000048 MHz
WDW       EM
SSB       0
LB        0.30 Hz
GB        0
PC        1.00

```

12da' IN DMSO AT 20 DEG C

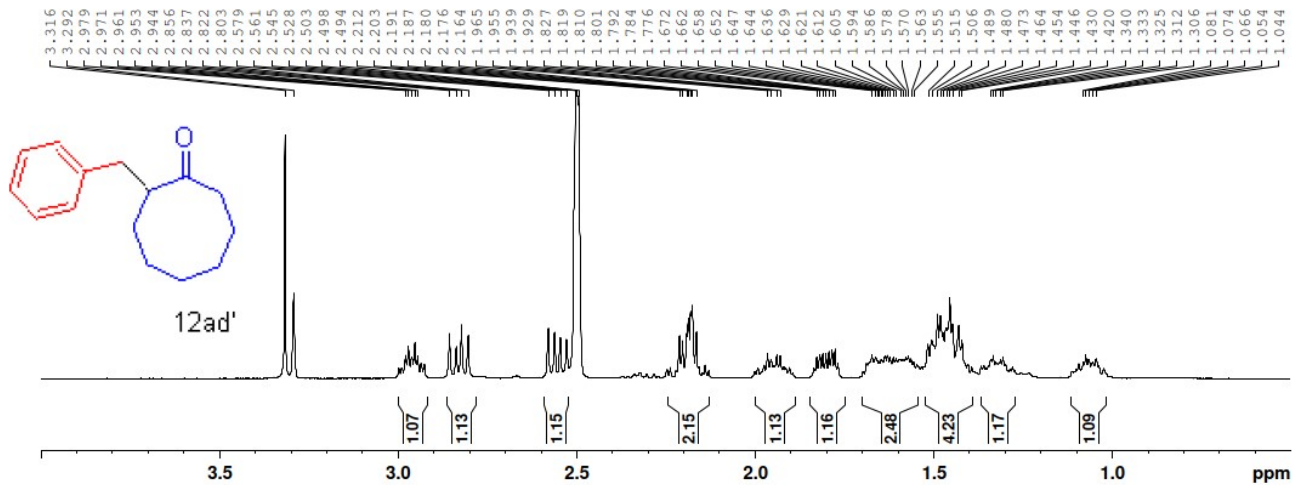

14 IN DMSO

Current Data Parameters  
 NAME 14  
 EXPRO 10  
 PROCNO 1

F2 - Acquisition Parameters  
 Date\_ 20220421  
 Time 18:36 h  
 INSTRUM spect  
 PROBRD 28246.0048 (PS)  
 PULPROG zg30  
 TD 24036  
 SOLVENT dmsd  
 NS 8  
 DS 0  
 SSW 8012.820 Hz  
 FIDRES 0.666735 Hz  
 AQ 1.4998465 sec  
 RG 40.3  
 DW 62.400 usec  
 DE 6.50 usec  
 TE 300.0 K  
 D1 1.00000000 sec  
 TSD 1  
 SFO1 400.1024006 MHz  
 NUC1 1H  
 FO 6.00 usec  
 P1 18.00 usec  
 PLW1 10.00000000 W

F2 - Processing parameters  
 SI 16394  
 SF 400.1000031 MHz  
 MDW EM  
 SSB 0  
 LB 0 Hz  
 GB 0  
 PC 1.00

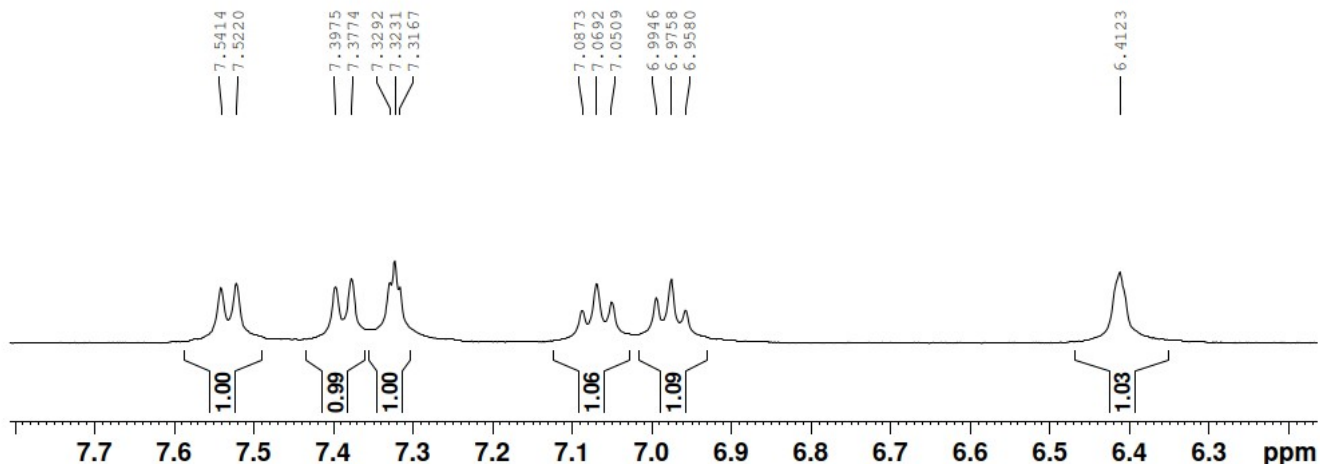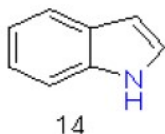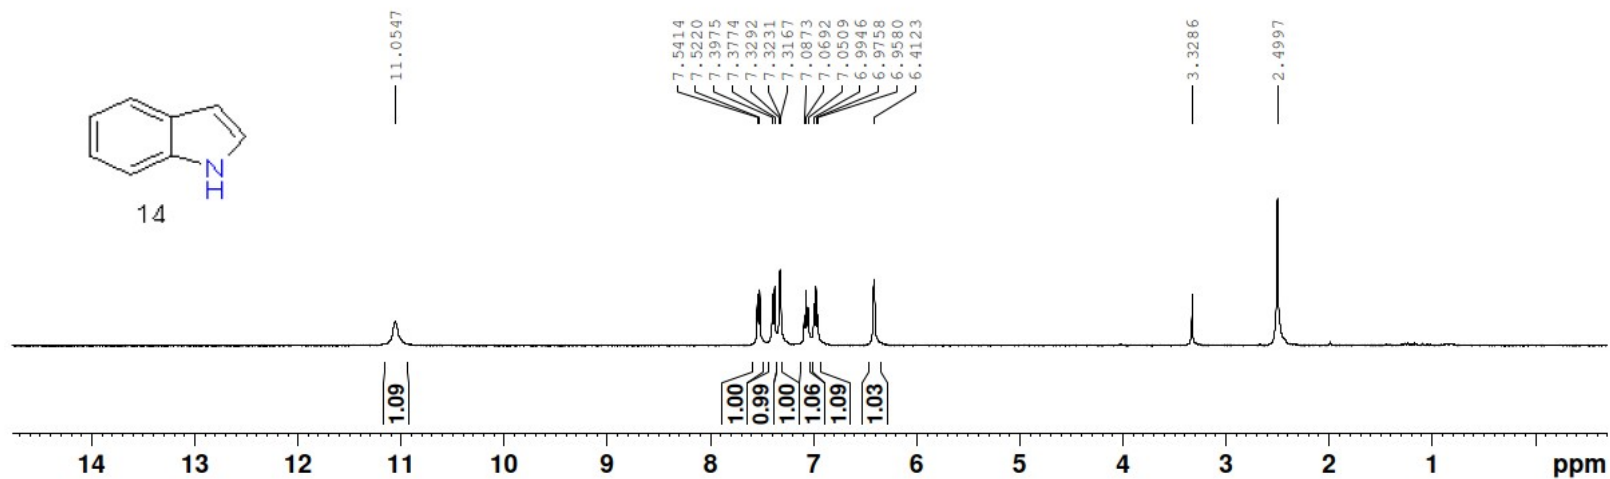

Current Data Parameters  
 NAME 10  
 EXPNO 10  
 PROCNO 1

F2 - Acquisition Parameters  
 Date\_ 20220204  
 Time 22:18 h  
 INSTRUM spect  
 FREQID 88246.5048 MHz  
 PULPROG zgpg30  
 TD 65536  
 SFO 400.1362999 MHz  
 SOLVENT CDCl3  
 NS 8  
 DS 8  
 SWH 8032.820 MHz  
 FIDRES 0.448720 MHz  
 AQ 1.4998460 sec  
 RG 383  
 SW 62.400 usec  
 DE 4.00 usec  
 TR 300.0 MHz  
 TD 1.0000000 sec  
 TSD 0  
 SFO1 400.1004000 MHz  
 NS1 18  
 DS1 18  
 F1 10.0000000 MHz  
 FWHM 10.0000000 MHz

F2 - Processing parameters  
 SI 32768  
 SF 400.1001330 MHz  
 WHW 800  
 SSB 0  
 LB 0 Hz  
 GB 0  
 PC 1.00

10 IN CDC13

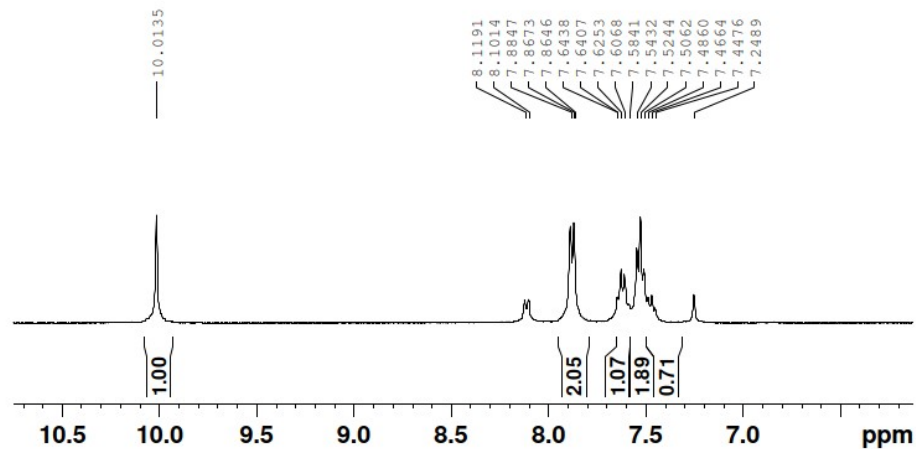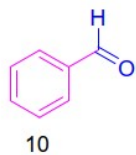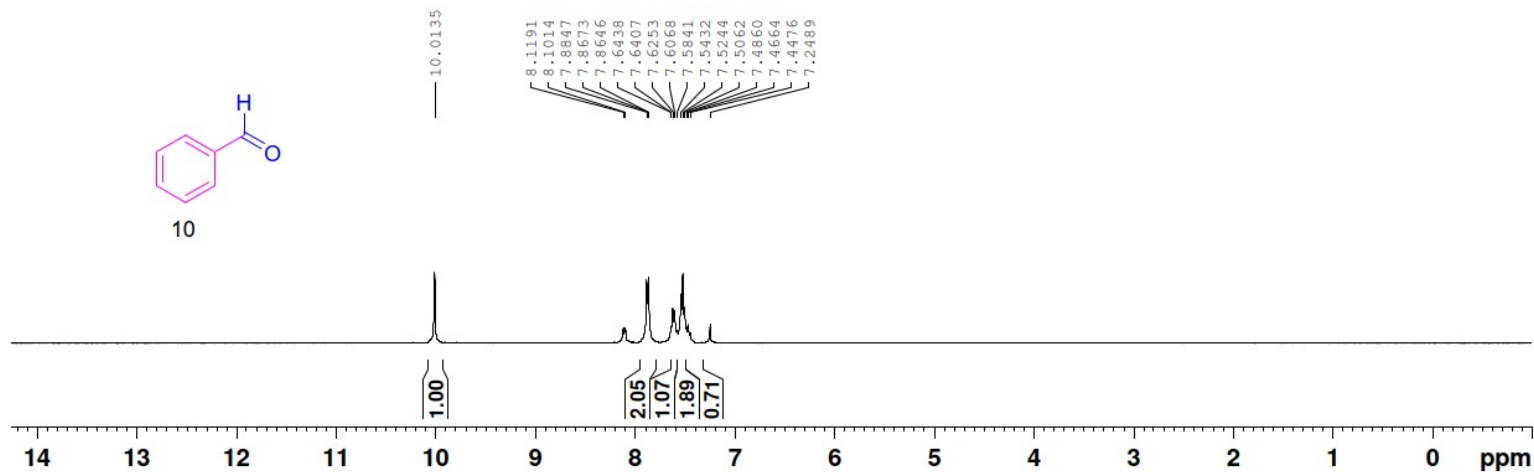

10b IN CDCl3

Current Data Parameters  
 NAME 10b  
 EXPNO 10  
 PROCNO 1

F2 - Acquisition Parameters  
 Date\_ 20220510  
 Time\_ 20.36  
 INSTRUM spect  
 PROBHD 5 mm PABBO BB-  
 PULPROG zg30  
 ID 24576  
 SOLVENT CDCl3  
 NS 8  
 DS 0  
 SWH 8012.820 Hz  
 FIDRES 0.226043 Hz  
 AQ 1.5335923 sec  
 RG 512  
 DW 62.400 usec  
 DE 6.50 usec  
 TE 673.2 K  
 D1 0.00000000 sec  
 TDO

===== CHANNEL f1 =====

NUC1 1H  
 P1 17.00 usec  
 PL1 0.00 dB  
 SFO1 400.2024714 MHz

F2 - Processing parameters  
 SI 16384  
 SF 400.200182 MHz  
 EQ  
 SSB 0  
 LB 0.30 Hz  
 CB 0  
 PC 1.00

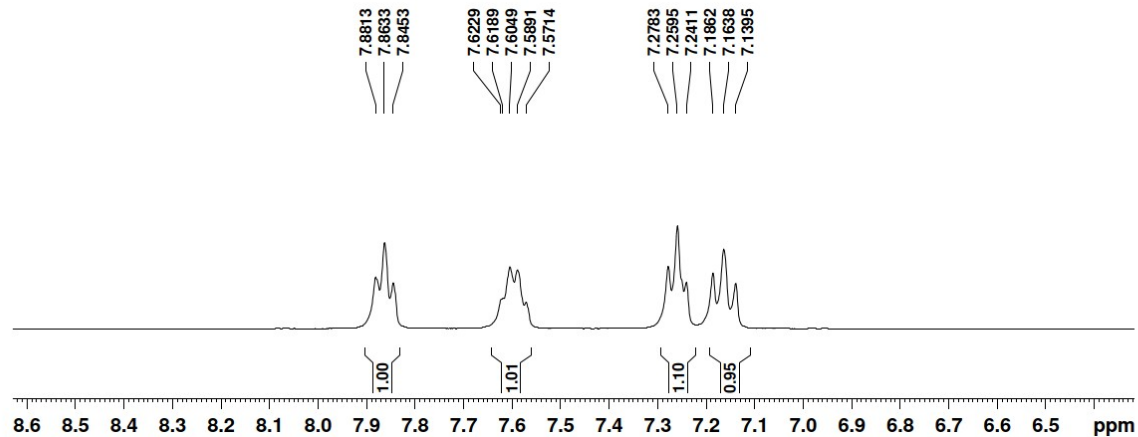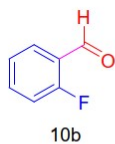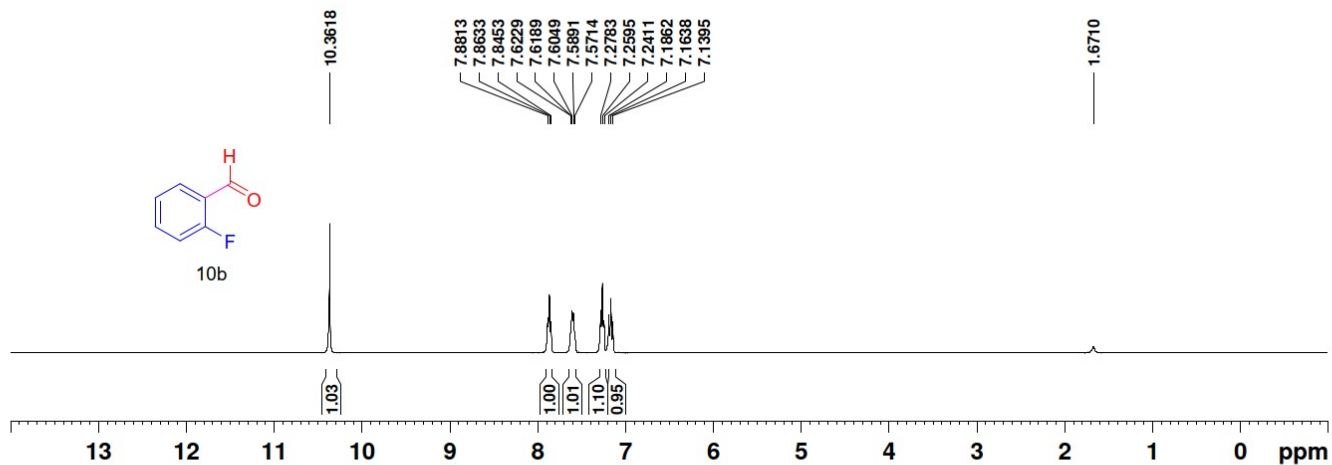

10c IN CDCl3

Current Data Parameters  
NAME 10c  
EXPNO 10  
PROCNO 1

F2 - Acquisition Parameters  
Date\_ 20220511  
Time 19.28  
INSTRUM spect  
PROBHD 5 mm PABBO BB-  
PULPROG zg30  
TD 24576  
SOLVENT CDCl3  
NS 8  
DS 0  
SWH 8012.820 Hz  
FIDRES 0.226043 Hz  
AQ 1.5335923 sec  
RG 512  
DW 62.400 usec  
DE 6.50 usec  
TE 673.2 K  
D1 0.00000000 sec  
TDo 1

===== CHANNEL f1 =====  
NUC1 1H  
P1 17.00 usec  
PL1 0.00 dB  
SFO1 400.2024714 MHz

F2 - Processing parameters  
SI 16384  
SF 400.200185 MHz  
WDW EM  
SSB 0  
LB 0.30 Hz  
CB 0  
PC 1.00

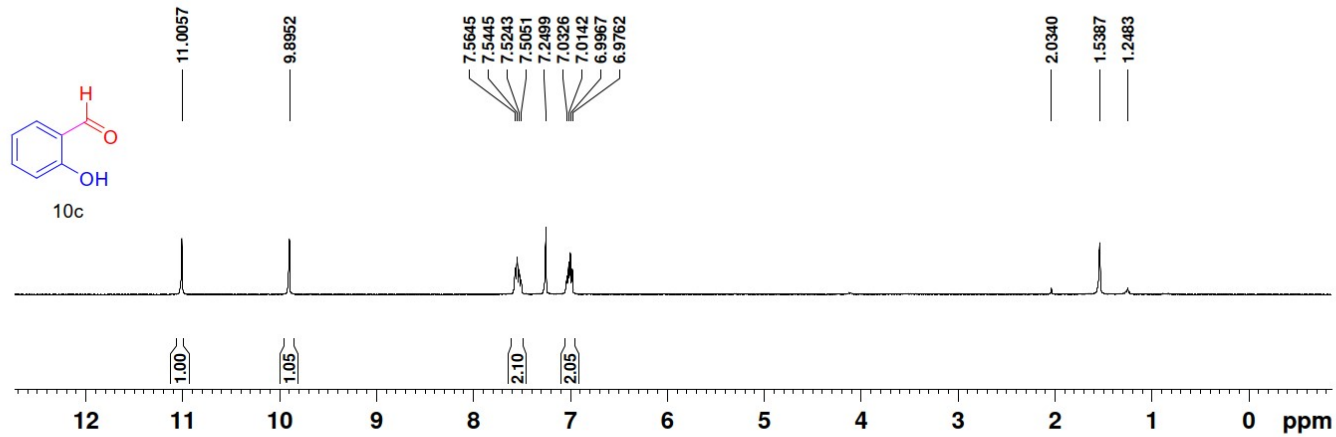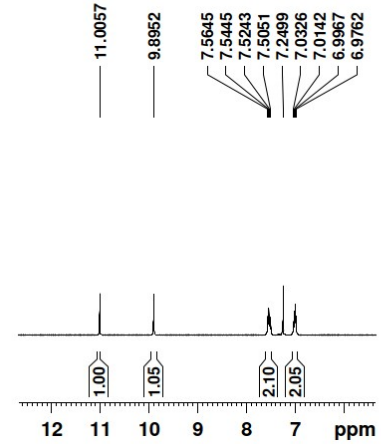



7bd IN DMSO

```

Current Data Parameters
NAME      7bd
EXPNO    10
PROCNO   1

F2 - Acquisition Parameters
Date_    20200514
Time     12.19
INSTRUM  spect
PROBHD   5 mm PABBO MM-
PULPROG  zg30
TD       24036
SOLVENT  DMSO
NS       8
DS       0
SFO1     8012.820 Hz
FIDRES   0.333367 Hz
AQ       1.4399465 sec
RG       128
SWH       62.400 usec
HE       6.50 usec
TE       673.2 K
D1       1.0000000 sec
TD0      1

===== CHANNEL f1 =====
NUC1     1H
P1       17.00 usec
PL1     0 dB
SFO1    400.2024714 MHz

F2 - Processing parameters
SI       16384
SF       400.2000086 MHz
WDW      EM
SSB      0
LA       0.30 Hz
GB       0
CB       1.00
    
```

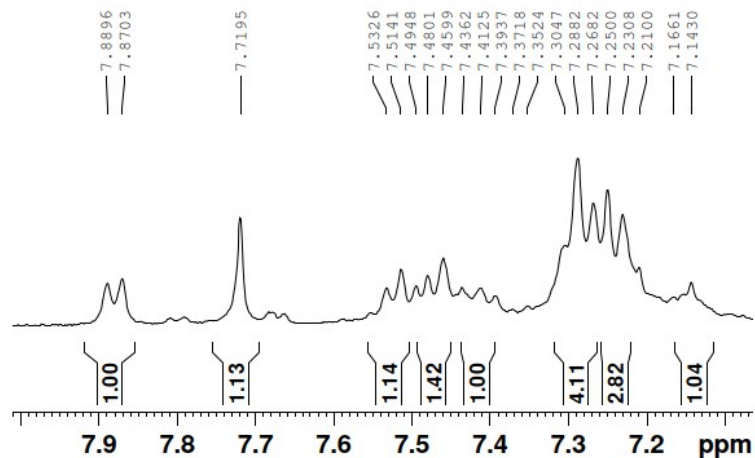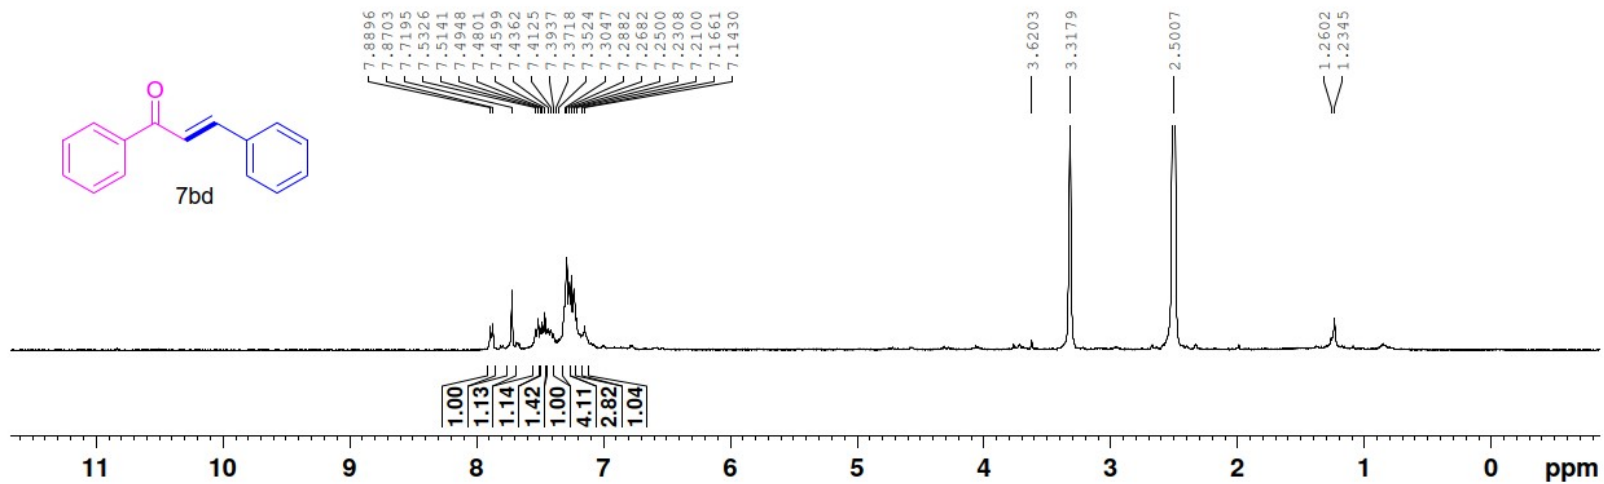

7bd IN CDC13

```

Current Data Parameters
NAME      7bd
EXPNO     10
PROCNO    1
F2 - Acquisition Parameters
Date_     20220309
Time      23.52 h
INSTRUM   apc01
PROBHD    ZB246_0048 (PH
PULPROG   zg30
TD        24036
SOLVENT   CDCl3
NS        8
DS        0
SMH       8012.820 Hz
FIDRES    0.666735 Hz
AQ        1.4998465 sec
RG        45.2
DM        62.400 usec
DE        6.50 usec
TE        300.0 K
D1        1.00000000 sec
TDD       5
SFO1      400.1024006 MHz
NUC1      13
PC        1.00
F2 - Processing parameters
SI        16384
SF        400.1000134 MHz
WDW       EM
SSB       0
LB        0 Hz
GB        0
PC        1.00
    
```

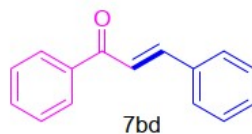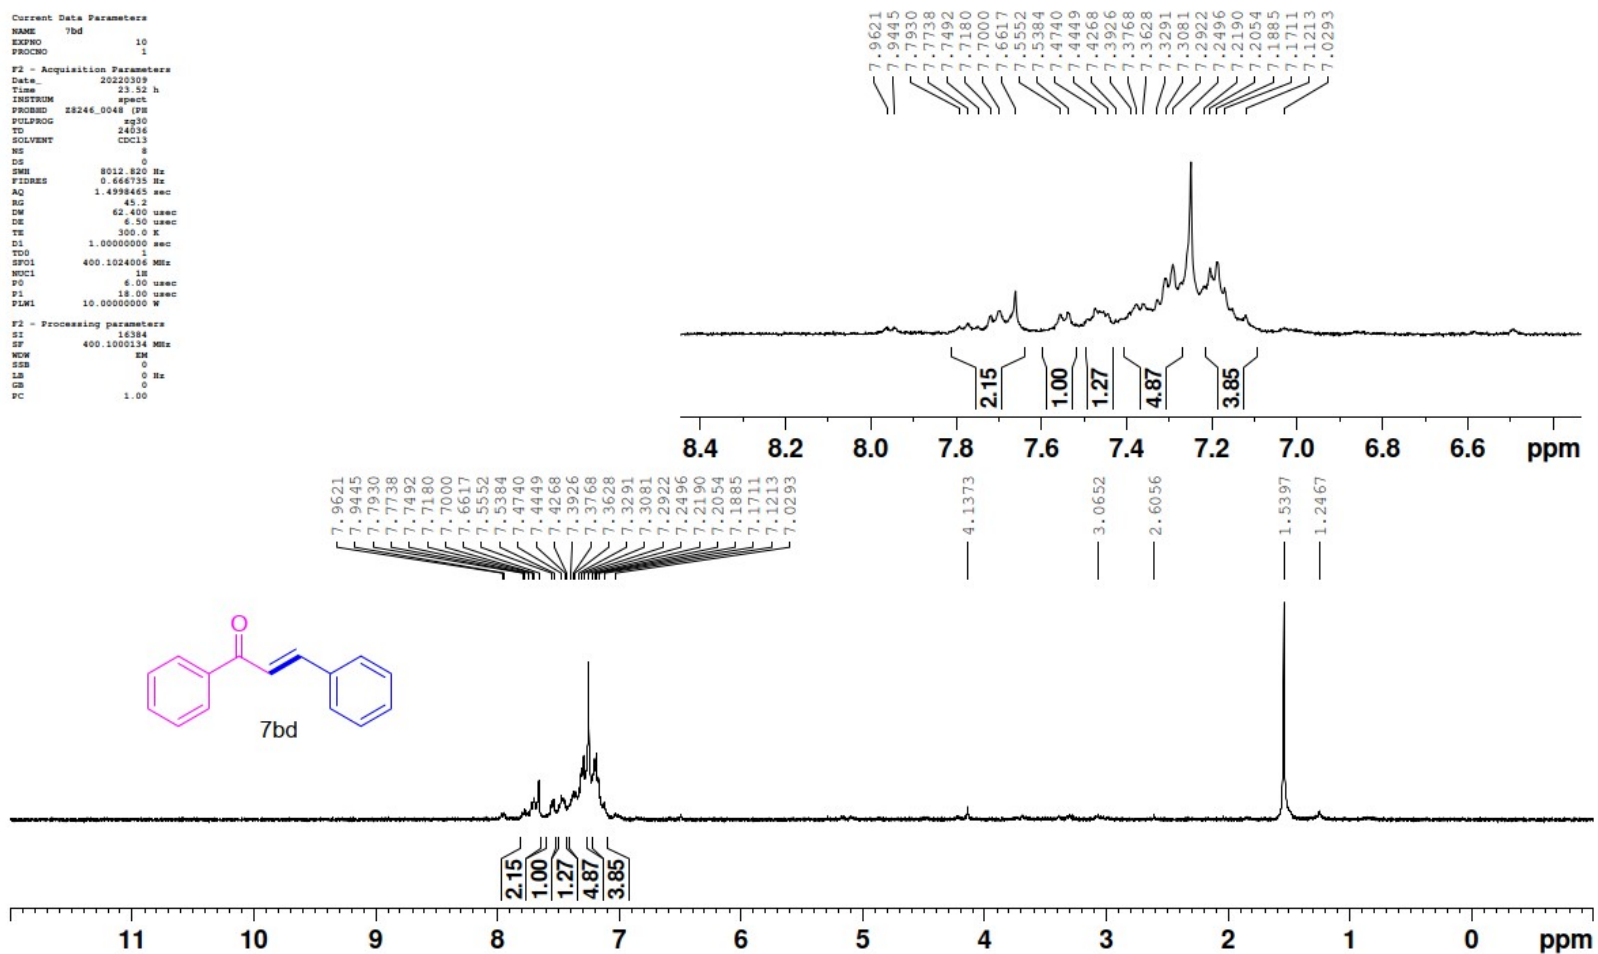

## References

- [1] X.-N. Cao, X.-M. Wan, F.-L. Yang, K. Li, X.-Q. Hao, T. Shao, X. Zhu and M.-P. Song, *The Journal of Organic Chemistry*, **2018**, 83, 3657-3668.
- [2] Xu, Zhongliang; Ba, Mingyu; Zhou, Hua; Cao, Yingli; Tang, Chaojun; Yang, Ying; He, Ricai; Liang, Yu; Zhang, Xuemei; Li, Zhenzhong; et al, *European Journal of Medicinal Chemistry*, **2014**, 85, 27-42.
- [3] C. Meng, J. Xu, Y. Tang, Y. Ai and F. Li, *New J. Chem.*, **2019**, DOI: 10.1039/C9NJ03345A.
- [4] D. Wang, R. T. McBurney, I. Pernik and B. A. Messerle, *Dalton Trans.*, **2019**, DOI: 10.1039/C9DT02819F.
- [5] Zhang, Guoqi ; Wu, Jing; Zeng, Haisu; Zhang, Shu; Yin, Zhiwei ; Zheng, *Shengping Organic Letters*, **2017**, 19(5), 1080-1083.
- [6] C. S. Cho, B. T. Kim, T.-J. Kim, S. C. Shim, *Tetrahedron Letters*, **2002**, 43, 7987-7989.
- [7] S. Genç, S. Günnaz, B. Çetinkaya, S. I. Gülcemal and D. Gülcemal, *The Journal of Organic Chemistry*, **2018**, 83, 2875-2881.
- [8] a) Lei, Chuanhu; Zhu, Daoyong; Tangcuelco, Vicente Tiu III; Zhou, Jianrong Steve, *Organic Letters* , **2019**, 21(15), 5817-5822; b) Elangovan, Saravanakumar; Sortais, Jean-Baptiste; Beller, Matthias; Darcel, Christophe, *Angewandte Chemie*, International Edition, **2015**, 54(48), 14483-14486.
- [9] Seck, Charlotte; Mbaye, Mbaye Diagne; Coufourier, Sebastien; Lator, Alexis; Lohier, Jean-Francois; Poater, Albert ; Ward, Thomas R.; Gaillard, Sylvain ; Renaud, Jean-Luc , *ChemCatChem*, **2017**, 9(23), 4410-4416.
- [10] Chakrabarti, Kaushik; Paul, Bhaskar; Maji, Milan; Roy, Bivas Chandra; Shee, Sujan; Kundu, Sabuj; *Organic & Biomolecular Chemistry*, **2016**, 14(46) 10988-10997.
- [11] Martinez, Ricardo; Brand, Gabriel J.; Ramon, Diego J.; Yus, Miguel, *Tetrahedron Letters*, **2005**, 46(21), 3683-3686.
- [12] Cui, Xinjiang; Zhang, Yan; Shi, Feng; Deng, Youquan, *Chemistry - A European Journal*, **2011**, 17(3), 1021-1028, S1021/1-S1021/69
- [13] Xu, Qing; Chen, Jianhui; Liu, *Quan Advanced Synthesis & Catalysis*, **2013**, 355(4), 697-704.
- [14] Feng; Ma, Juan; Wang, Nana, *Journal of Organic Chemistry*, **2014**, 79(21), 10447-10455.
- [15] Corey, E. J.; Bakshi, Raman K.; Shibata, Saizo, *Journal of the American Chemical Society*, **1987**, 109(18), 5551-3.

- [16] Zook, H. D.; Gumby, W. L., *Journal of the American Chemical Society*, **1960**, 82, 1386-9.
- [17] Prasanna, Ramanathan; Guha, Somraj; Sekar, Govindasamy, *Organic Letters*, 2019, 21(8), 2650-2653.
- [18] Fujita, Kenichi; Asai, Chiho; Yamaguchi, Tetsuhiro; Hanasaka, Fumihiko; Yamaguchi, Ryohei, *Organic Letters*, **2005**, 7(18), 4017-4019.
- [19] Wagholikar, S. G.; Niphadkar, P. S.; Mayadevi, S.; Sivasanker, S., *Applied Catalysis, A: General*, **2007**, 317(2), 250-257.
- [20] Maji, Ankur ; Singh, Anshu ; Singh, Neetu ; Ghosh, Kaushik , *ChemCatChem*, **2020**, 12(11), 3108-3125.
- [21] Narjinari, Himani; Tanwar, Niharika; Kathuria, Lakshay; Jasra, Raksh Vir; Kumar, Akshai, *Catalysis Science & Technology*, **2022**, 12(15), 4753-4762.
- [22] Irvine, John L.; Hall, Iris H.; Carlson, Gerald L.; Piantadosi, Claude, *Journal of Organic Chemistry*, **1972**, 37(12), 2033-4.
- [23] Piantadosi, Claude; Hall, Iris H.; Irvine, John L.; Carlson, Gerald L. *Journal of Medicinal Chemistry*, **1973**, 16(7), 770-5.
- [24] Tian, Fengtao; Yao, Dongmei; Liu, Yuanyuan; Xie, Fang; Zhang, Wanbin, *Advanced Synthesis & Catalysis*, **2010**, 352(11+12), 1841-1845.
- [25] Hall, Iris H.; Carlson, Gerald L.; Abernethy, G. Shuford; Piantadosi, Claude, *Journal of Medicinal Chemistry*, **1974**, 17(12), 1253-7.
- [26] Sheldrick, G. SHELXTL v. 6.12, structure determination software suite. Bruker AXs Madison, Wisconsin, USA: **2000**.
- [27] Bourhis, L. J.; Dolomanov, O. V.; Gildea, R. J.; Howard, J. A.; Puschmann, H. The anatomy of a comprehensive constrained, restrained refinement program for the modern computing environment—Olex2 dissected. *Acta Crystallographica Section A: Foundations and Advances*, **2015**, 71 (1), 59-75.
- [28] a) Sheldrick, G. XS. version 2013/1, Georg-August-Universität Göttingen, Germany, **2013**; b) GM Sheldrick. *Acta Crystallogr., Sect. A* , **2015**, 71, 3-8; c) Sheldrick, G. M. Crystal structure refinement with SHELXL. *Acta Crystallographica Section C: Structural Chemistry*, **2015**, 71 (1), 3-8.; d) Farrugia, L. J. ORTEP-3 for Windows—a version of ORTEP-III with a Graphical User Interface (GUI). *Journal of Applied Crystallography*, **1997**, 30 (5), 565-565.
- [29] a) Gatti, A.; Habtemariam, A.; Romero-Canelón, I.; Song, J.-I.; Heer, B.; Clarkson, G. J.; Rogolino, D.; Sadler, P. J.; Carcelli, M. *Organometallics* , **2018**, 37(6), 891-899; b) Tanaka, K.; Miki, T.; Murata, K.; Yamaguchi, A.; Kayaki, Y.; Kuwata, S.; Ikariya, T.; Watanabe, M. *The Journal of Organic Chemistry*,. **2019**, 84 (17), 10962-10977.
- [30] a) Fun, H.-K.; Kia, R.; D'Silva, E. D.; Patil, P.; Dharmaprakash, S. *Acta Crystallographica Section E: Structure Reports Online* , **2008** , 64 (12), 2274-2275; b) de Oliveira, A. B.; Feitosa, B. R. S.; Näther, C.; Jess, I. *Acta Crystallographica Section E: Structure Reports Online*, **2013**, 69 (12), 1861; c)

Romerosa, A.; Saoud, M.; Campos-Malpartida, T.; Lidrissi, C.; Serrano-Ruiz, M.; Peruzzini, M.; Garrido, J. A.; García-Maroto, F. *Wiley Online Library*: **2007**. d) Ferrari, M. B.; Capacchi, S.; Pelosi, G.; Reffo, G.; Tarasconi, P.; Albertini, R.; Pinelli, S.; Lunghi, P. *Inorganica Chimica Acta*, **1999**, 286 (2), 134-141.

[31] Das, Jagadish; Vellakkaran, Mari ; Banerjee, Debasis .*Journal of Organic Chemistry*, **2019**, 84(2), 769-779.

[32] Wang, Sen; Miao, Rui; Xia, Yanping; Wei, Yifei; Luo, Renshi ; Ouyang, Lu. *Synthesis*, **2022**, 54(23), 5253-5260.

[33] Chan, Louis K. M.; Poole, Darren L.; Shen, Di; Healy, Mark P.; Donohoe, Timothy J. *Angewandte Chemie, International Edition*, **2014**, 53(3), 761-765

[34] Ganguli, Kasturi; Mandal, Adarsha; Kundu, Sabuj , *ACS Catalysis*, **2022**, 12(19), 12444-12457.
